# Supplementary material for: Effects of Kasugamycin on the Translatome of Escherichia coli
Source: PLoS One. 2017 Jan 12;12(1):e0168143. doi: 10.1371/journal.pone.0168143 (PMC5230787; doi:10.1371/journal.pone.0168143)
Supplement: S1 Table — Listed are the gene names, annotation, results of the five DNA microarray analyses in the absence and presence of Kasugamycin, respectively, average results, KEV values, and the p-values of a t-test. (XLS) [file pone.0168143.s004.xls]

## Sheet: Tabelle1
	b No.	Gene	Annotation	untreated 1	untreated 2	untreated 3	untreated 4	untreated 5	average	stand. dev.	variat. coeff.	No. exp		Ksg treated 1	Ksg treated 2	Ksg treated 3	Ksg treated 4	Ksg treated 5	average	stand.dev.	variat. coeff.	No. Exp.		KEV	t-test	b No.
	b0995	torR	DNA-binding response regulator in two-component regulatory system with TorS		1.98716	2.12688		1.15015	1.75473	0.528222	30.1027	3		0.0334301	0.165026	15.9108			0.0992281	0.0872436	87.9223	3		0.0565489	0.563805	b0995
	b2112	yehE	predicted protein			2.34526	0.121749	2.25398	2.29962	0.0645443	2.80673	3		0.0549121	0.159028		0.2249	2.51337	0.14628	0.0857077	58.5916	4		0.0636104	0.420049	b2112
	b2887	ygfT	fused predicted oxidoreductase: Fe-S subunit/nucleotide-binding subunit		2.31382	1.34633		1.62387	1.76134	0.498178	28.284	3		0.0766471	0.156565	1.27151	0.174191		0.135801	0.0519813	38.2776	4		0.077101	0.0225964	b2887
	b1579			0.465392	0.590457	2.5424	0.380111	2.49636	1.29494	1.12037	86.5188	5			0.130527	5.41906	0.128453		0.12949	0.00146628	1.13235	3		0.0999964	0.771375	b1579
	b0643	ybeL	conserved protein	14.7078	1.04798	0.679035		23.0905	9.88133	10.9619	110.935	4		1.15382		0.775612	1.24223		1.05722	0.247853	23.4438	3		0.106992	0.205778	b0643
	b0563			20.3514			13.4296	1.37356	11.7182	9.60397	81.9579	3			1.34727	1.78016	0.797677		1.30837	0.492394	37.6342	3		0.111653	0.20098	b0563
	b2562	yfhL	predicted 4Fe-4S cluster-containing protein	4.00018	998.15		1.62091	0.90154	2.17421	1.62173	74.5894	4			0.211656	0.367871	0.283011	0.236581	0.27478	0.0687448	25.0181	4		0.126382	0.387861	b2562
	b4149	blc	outer membrane lipoprotein (lipocalin)	0.427981		1.41766		1.44263	1.09609	0.578734	52.7999	3		0.127438	0.197115	0.796224			0.162277	0.0492695	30.3614	3		0.14805	0.154834	b4149
	b2079	baeR	DNA-binding response regulator in two-component regulatory system with BaeS	0.497317	0.555131	2.6331	0.863438	1.16443	0.77008	0.30813	40.0127	5		0.058809	0.103767		0.238639	1.2194	0.133738	0.0935864	69.9772	4		0.173668	0.168234	b2079
	b0920	ycbC	conserved inner membrane protein	11.3711	4.37708			0.856531	5.5349	5.35204	96.6963	3		1.26006	1.03493	1.01471	0.915625	0.868384	1.01874	0.151453	14.8666	5		0.184058	0.281325	b0920
	b3375	frlR	predicted DNA-binding transcriptional regulator	0.228226	0.210368	2.19492	0.416757	1.82067	0.974189	0.956208	98.1543	5		0.103091	0.268183			3.3778	0.185637	0.135281	72.8739	3		0.190555	0.827576	b3375
	b4295	yjhU	KpLE2 phage-like element; predicted DNA-binding transcriptional regulator	10.1755			12.375	5.03261	9.19436	3.76823	40.9841	3		3.83083			0.846334	1.58031	2.08583	1.55514	74.5577	3		0.226859	0.0661009	b4295
	b4185	yjfM	conserved protein	3.43441			0.399224	2.05473	2.74457	0.97558	35.5458	3		0.722748	0.669308	0.426314	0.566759	0.832456	0.643517	0.154685	24.0374	5		0.234469	0.27116	b4185
	b2561	yfhH	predicted DNA-binding transcriptional regulator	0.707997	4.40657	0.373155	3.27098	1.68229	2.0882	1.71646	82.198	5			0.728232	0.36905	0.463181	0.46394	0.506101	0.154645	30.5561	4		0.242363	0.108219	b2561
	b1824	yobF	predicted protein	1.22789	1.53873	1.27763	0.569858	0.992486	1.12132	0.364255	32.4845	5		0.325742	0.239304	0.308335	0.243797	0.252563	0.273948	0.0400989	14.6374	5		0.244309	0.00622868	b1824
	b3764	yifE	conserved protein	0.76481	0.723788		1.22025	0.920502	0.907339	0.225163	24.8158	4		0.299439	0.175361	0.290004	0.190286	0.164008	0.22382	0.0654769	29.2543	5		0.246677	0.00681945	b3764
	b3078	ygjI	predicted transporter	2.59221		0.530177	4.42124	1.09228	2.15898	1.7413	80.6538	4		0.486319	0.550957	0.402052	0.690678	0.584355	0.542872	0.108006	19.8953	5		0.251449	0.160324	b3078
	b1809	yoaB	conserved protein	1.8345	1.94359	1.02249	0.849341	1.44267	1.41852	0.482214	33.9942	5		0.329025	0.316045	0.412818	0.317078	0.427477	0.360489	0.0549445	15.2417	5		0.25413	0.00767449	b1809
	b0314	betT	choline transporter of high affinity		8.37145		23.3782	1.14311	4.75728	5.1112	107.44	3		1.16285	2.00794	0.959631	0.976331		1.27669	0.49613	38.8606	4		0.268366	0.277057	b0314
	b1694	ydiF	fused predicted acetyl-CoA:acetoacetyl-CoA transferase: alpha subunit/beta subunit	1.01362			0.434729	5.82647	2.42494	2.96	122.065	3		0.241788	0.423637	1.41683			0.694087	0.632488	91.1252	3		0.286229	0.418787	b1694
	b2154	yeiG	predicted esterase	1.11575	1.10394	1.67012	0.254757	1.27776	1.08447	0.517235	47.6949	5			0.342649		0.287771	2.61708	0.31521	0.0388047	12.3107	3		0.290659	0.998235	b2154
	b0542			1.57358	1.19667		3.50284	1.14401	1.30476	0.234295	17.957	4		0.294412	0.508546			2.60418	0.401479	0.151416	37.7144	3		0.307705	0.479655	b0542
	b3773	ilvY	DNA-binding transcriptional dual regulator	0.452127	1.14937		0.797086	0.959028	0.839403	0.295614	35.2172	4		0.0785801	0.14221	0.634339	0.239758	2.00089	0.273722	0.249382	91.1078	5		0.326091	0.593548	b3773
	b4181	yjfI	conserved protein	6.32377			3.60751	1.03742	3.65623	2.64351	72.3015	3		0.784394		1.35928		1.49637	1.21335	0.377757	31.1334	3		0.331858	0.249142	b4181
	b0474	adk	adenylate kinase	1.7976	1.4002	2.13888	0.941421	1.93497	1.64261	0.475976	28.9767	5		0.671722	0.435727	0.490224	0.523868	0.615857	0.54748	0.095441	17.4328	5		0.333298	0.00590594	b0474
	b1238	tdk	thymidine kinase/deoxyuridine kinase	1.25639		1.16069	0.995746	0.886868	1.07492	0.165247	15.3729	4		0.430149	0.243582	0.376614	0.265442	0.523076	0.367773	0.116171	31.5878	5		0.342138	0.000646178	b1238
	b3009	yghB	conserved inner membrane protein	1.33029	1.01513	0.658651	1.80251	0.888583	1.13903	0.443179	38.9083	5			0.363111	1.0796	0.417756		0.390433	0.0386397	9.89661	3		0.342776	0.151361	b3009
	b3710	mdtL	multidrug efflux system protein	0.272054	0.534956	1.84851	0.759907	1.77003	1.03709	0.726266	70.0292	5		0.0789084	0.241647	0.752675			0.357743	0.351567	98.2734	3		0.344949	0.127081	b3710
	b1839	yebY	predicted protein	1.11876	8.04605	0.911827	0.946076	1.1867	1.04084	0.132879	12.7665	5		0.349982	0.240142		0.284514	0.564996	0.359908	0.143977	40.0037	4		0.345787	0.211842	b1839
	b0669			0.569066	0.345385	0.774777	0.6615	0.913807	0.652907	0.214822	32.9024	5		0.263661	0.190107	0.332951	0.179741	0.168509	0.226994	0.0699738	30.8263	5		0.347667	0.00898414	b0669
	b2048	cpsG	phosphomannomutase	1.00148		1.50505	0.281928	80.4972	0.929489	0.614733	66.1366	4		0.220967	0.432081			1.89323	0.326524	0.14928	45.7179	3		0.351294	0.389411	b2048
	b2772			1.5677		0.363985		1.85845	1.71308	0.205595	12.0015	3		1.73198	0.618272	0.491626		0.69582	0.601906	0.103076	17.1249	4		0.35136	0.526069	b2772
	b2115				0.201415	2.38863	0.089419	2.29462	1.24352	1.26939	102.08	4		0.0723036	0.208823	1.03345			0.438193	0.106045	24.2004	3		0.352381	0.312781	b2115
	b3261	fis	global DNA-binding transcriptional dual regulator	0.412849		0.775881	0.275176	0.743859	0.551941	0.246932	44.7389	4		0.192292	0.150696	0.177625	0.175537	0.292899	0.19781	0.0552167	27.914	5		0.35839	0.061416	b3261
	b3180	yhbY	predicted RNA-binding protein	0.185359	2.20281	0.410878	0.525808	0.540772	0.415704	0.164161	39.4899	5		0.263218	0.145354	0.104152	0.119992	0.120847	0.150713	0.0645946	42.8594	5		0.362548	0.16172	b3180
	b3602	yibL	conserved protein	3.40866			0.667659	1.31452	1.79695	1.43277	79.7337	3		0.546384	0.474559	0.665776	0.521505	1.0646	0.654564	0.239824	36.6387	5		0.364265	0.300601	b3602
	b1087	yceF	predicted protein	5.10651	7.11283		1.11284	1.05903	3.5978	3.01397	83.7725	4		1.03123	1.12035	1.56555	1.20649	1.6446	1.31364	0.274587	20.9027	5		0.365124	0.22687	b1087
	b2765	sscR	6-pyruvoyl tetrahydrobiopterin synthase (PTPS)	1.46244	0.557759	0.863203	1.05722	0.932815	0.974688	0.328911	33.7453	5		0.500945	0.288767	0.395883	0.25713	0.344544	0.357454	0.0961978	26.9119	5		0.366736	0.0115002	b2765
	b1047	mdoC	membrane protein required for modification of periplasmic glucan	2.75712	3.81296	0.945372		1.45829	2.24344	1.2947	57.7104	4		0.840087	0.985798	0.860479	0.623069		0.827358	0.150661	18.2099	4		0.36879	0.115769	b1047
	b4336	yjiN	conserved inner membrane protein	2.59065	2.56306		1.43259	2.93448	2.38019	0.653938	27.4741	4		1.27271	0.923538	0.457358	0.859301	0.893053	0.881193	0.289542	32.8579	5		0.370219	0.0134416	b4336
	b1779	gapA	glyceraldehyde-3-phosphate dehydrogenase A	0.663961	1.13103	0.793447	0.61441	1.25044	0.890656	0.284768	31.9729	5		0.287152	0.314513		0.261433	0.462598	0.331424	0.0900948	27.1841	4		0.372112	0.00915341	b1779
	b1824	yobF	predicted protein	1.48305	1.41097	2.05468	1.28697	0.87998	1.42313	0.423125	29.732	5		0.686403		0.837012	0.389532	0.299758	0.553176	0.251205	45.4114	4		0.388704	0.00723004	b1824
	b4117	adiA	biodegradative arginine decarboxylase	1.24252		1.16131	0.231979	1.87774	1.42719	0.392293	27.4871	4		0.386238	0.321825	0.781783	0.288903	0.996996	0.555149	0.316405	56.9947	5		0.38898	0.192908	b4117
	b0935	ssuD	alkanesulfonate monooxygenase, FMNH(2)-dependent		3.95832		2.70016	1.34585	2.66811	1.30653	48.9684	3		0.870269		1.302	1.02324	1.00706	1.05064	0.181077	17.2349	4		0.393778	0.163445	b0935
	b0937	ssuE	NAD(P)H-dependent FMN reductase		3.84947	0.790733		2.0582	2.2328	1.53682	68.8294	3			1.01067	0.867213	0.823281	0.818986	0.880039	0.0897754	10.2013	4		0.394141	0.266672	b0937
	b2412	zipA	cell division protein involved in Z ring assembly		1.00716	0.947259	0.682304	0.69504	0.83294	0.168452	20.2238	4		0.25028	0.199441	0.286982	0.338471	0.573957	0.329826	0.145635	44.155	5		0.395978	0.00318253	b2412
	b1282	yciH	conserved protein	0.566406	0.827481		1.49737	1.24345	1.03368	0.416282	40.272	4			0.333773		0.328493	0.572717	0.411661	0.139503	33.888	3		0.39825	0.0518465	b1282
	b1088	yceD	conserved protein	0.256474	1.05606	0.446658	0.351987	0.575011	0.537237	0.313029	58.2665	5		0.214771	0.191146		0.244123		0.21668	0.0265399	12.2484	3		0.403323	0.0835914	b1088
	b1658	purR	DNA-binding transcriptional repressor, hypoxanthine-binding	1.49012		1.52195	0.946802	2.06228	1.50529	0.455577	30.2651	4			0.444997	0.53261	0.550021	0.908032	0.608915	0.204638	33.6071	4		0.404517	0.0214671	b1658
	b2631	yfjO	CP4-57 prophage; predicted protein	1.38533	8.64861	1.48855	2.07322	0.655681	3.21652	0.581749	18.0863	5		1.30166	0.946869	2.26775	0.934187	1.08376	1.30685	0.557134	42.6319	5		0.406292	0.355224	b2631
	b3922	yiiS	conserved protein	5.23648	6.13003	1.31388	1.66824	1.22603	3.11493	2.37152	76.1339	5		0.937593	1.56613	1.32917			1.27763	0.31742	24.8445	3		0.410162	0.159018	b3922
	b0122	yacC	predicted protein			1.06226	3.60365	1.69542	2.12044	1.32293	62.3894	3			1.15691	0.612336	0.84966		0.87297	0.273036	31.2767	3		0.411692	0.241145	b0122
	b0946	ycbW	predicted protein	1.73481			2.2212	1.478	1.81134	0.377464	20.8389	3			0.561564	0.881711	0.57736	0.9976	0.754559	0.219	29.0236	4		0.416575	0.0225285	b0946
	b0822	ybiV	predicted hydrolase	1.54309	2.66843	1.37291	0.527148	0.909752	1.40427	0.811208	57.7674	5		0.420505	0.641918	0.6565	0.474371	0.788899	0.596438	0.148803	24.9487	5		0.424733	0.0893872	b0822
	b1481	bdm	biofilm-dependent modulation protein	3.90543		1.01338	0.401052	1.14088	2.15358	1.56061	72.4656	4		0.791631	0.702723	1.06928	0.534817	1.47823	0.915337	0.36941	40.3578	5		0.42503	0.439949	b1481
	b1448	yncA	predicted acyltransferase with acyl-CoA N-acyltransferase domain	3.88681			9.90313	1.72058	2.8037	1.53175	54.6334	3		3.83726	1.39091	0.997821			1.19437	0.277957	23.2723	3		0.425997	0.334575	b1448
	b3093	exuT	hexuronate transporter		95.14	0.783916	2.96665	0.749405	1.49999	1.27028	84.686	4				0.656183	0.558232	0.722198	0.645538	0.0825	12.78	3		0.430361	0.376285	b3093
	b2587	kgtP	alpha-ketoglutarate transporter	3.96656		0.48418		1.05436	1.83503	1.86784	101.788	3		15.0838	0.872638	0.651478	0.799066	0.840713	0.790973	0.0977541	12.3587	5		0.43104	0.578372	b2587
	b4186	yjfC	predicted synthetase/amidase	0.513977		0.490527	2.39081	1.11645	1.12794	0.890359	78.9366	4		0.563046	0.490369	0.406032			0.486482	0.0785796	16.1526	3		0.431301	0.245417	b4186
	b1201	dhaR	predicted DNA-binding transcriptional regulator, dihydroxyacetone	3.69904	2.11505	1.07131	1.58532	3.22622	2.33939	1.10251	47.128	5		0.492641	1.55971	1.0965	0.911868		1.01518	0.442284	43.5671	4		0.43395	0.0536294	b1201
	b4061	yjcC	predicted signal transduction protein (EAL domain containing protein)	3.10195	1.02854	1.58579	2.56388	0.908902	1.83781	0.962618	52.3785	5		0.774115	3.74415	0.849216			0.811666	0.0531048	6.54269	3		0.441648	0.96673	b4061
	b1033	ghrA	2-ketoacid reductase	1.48412	0.890425	1.39438	1.12023	0.958854	1.1696	0.261838	22.3869	5		0.361263	0.674348		1.486		0.517805	0.221385	42.7544	3		0.44272	0.434522	b1033
	b0785	moaE	molybdopterin synthase, large subunit	3.59694		0.544659	0.392878	0.760604	1.76503	0.184794	10.4697	4		0.93463	0.708255		0.707754		0.783547	0.130842	16.6987	3		0.443929	0.530185	b0785
	b4286			0.758689		1.33319	0.440768	2.3038	1.20911	0.817916	67.6461	4		0.298909	0.478058	0.821351	0.550758		0.537269	0.216953	40.3807	4		0.44435	0.199345	b4286
	b3357	crp	DNA-binding transcriptional dual regulator	0.593036	0.903486	0.682963	0.585285	1.0097	0.754894	0.191797	25.4071	5		0.299168	0.369311	0.289862	0.386488		0.336207	0.0487979	14.5142	4		0.44537	0.00650092	b3357
	b1109	ndh	respiratory NADH dehydrogenase 2/cupric reductase	0.637288	0.361128	1.08561	0.214189	1.74411	0.574554	0.383201	66.6954	5		0.138475	0.374423			1.88375	0.256449	0.16684	65.0578	3		0.446344	0.988489	b1109
	b0899	ycaM	predicted transporter	3.80417			7.91386	1.60582	2.705	1.55447	57.4666	3		1.38212	1.67673	0.604263			1.22104	0.554084	45.378	3		0.451402	0.221119	b0899
	b2007	yeeX	conserved protein	1.69728	3.11748	2.16359	0.91641	1.88759	1.95647	0.797572	40.7659	5		1.35106	0.644588	0.751256	0.773068	0.920675	0.888129	0.276879	31.1755	5		0.453945	0.0371104	b2007
	b0621	dcuC	anaerobic C4-dicarboxylate transport	1.05707			0.479772	2.83203	1.45629	1.22589	84.1789	3		0.905606	0.508853	0.554495		0.703167	0.66803	0.178797	26.7647	4		0.458721	0.381271	b0621
	b2353			9.82474			1.25108	2.29139	1.77124	0.735611	41.5309	3		4.2651	0.728967	0.902839			0.815903	0.122946	15.0687	3		0.46064	0.46487	b2353
	b0601	ybdM	conserved protein	2.52851	0.910869	1.02677	0.78517	2.66853	1.58397	0.931403	58.8019	5		0.861276		0.678414	0.757953	0.628757	0.7316	0.101515	13.8757	4		0.461878	0.110027	b0601
	b3718	yieK	predicted 6-phosphogluconolactonase			0.486929	0.893782	1.29007	0.890262	0.401585	45.1086	3		0.372482	0.373426	0.430712	0.346755	0.537348	0.412145	0.076434	18.5454	5		0.462948	0.172792	b3718
	b3065	rpsU	30S ribosomal subunit protein S21	0.906742	0.78602	0.862884	0.758931	0.667551	0.796425	0.0931521	11.6963	5		0.391288	0.294161	0.481672	0.347183	0.338541	0.370569	0.0710353	19.1692	5		0.465291	5.7166e-05	b3065
	b0762	ybhT	predicted protein	0.23302	0.817825	1.47556	1.08106	1.10472	0.942436	0.46059	48.8722	5		0.280741	0.391171	0.638203	0.370969	0.516795	0.439576	0.139368	31.7052	5		0.466425	0.0696541	b0762
	b1778	msrB	methionine sulfoxide reductase B	2.17491		1.37536	3.50888	5.66274	3.18047	1.8743	58.9316	4		1.39265	1.48353		1.2585	1.81909	1.48844	0.239028	16.0589	4		0.467994	0.168316	b1778
	b0884	infA	translation initiation factor IF-1	0.485786	0.838815	0.707885	0.634616	0.787059	0.690832	0.138432	20.0384	5		0.378406	0.339625	0.289098	0.327347	0.285873	0.32407	0.0383639	11.8382	5		0.4691	0.0029914	b0884
	b0521	ybcF	predicted carbamate kinase	1.24623		1.92533	1.30146	2.24132	1.67858	0.485356	28.9146	4			0.632454		0.773173	0.957194	0.787607	0.16285	20.6766	3		0.469209	0.0284808	b0521
	b3144	yraJ	predicted outer membrane protein	1.05821	0.531395	0.624195	1.57646	1.11475	0.981001	0.420677	42.8824	5		0.526476	0.403158		0.426056	0.488972	0.461165	0.0566752	12.2896	4		0.470097	0.049864	b3144
	b2910	zapA	protein that localizes to the cytokinetic ring	0.108475	0.709804	0.538406	0.135911	0.470368	0.392593	0.261984	66.7317	5		0.203084	0.20177	0.156205	0.136685	0.226562	0.184861	0.0370778	20.0571	5		0.470873	0.151254	b2910
	b3776			0.567561	2.71463		1.34051	1.08726	1.42749	0.916431	64.1987	4		0.745327	0.64897	0.69733		0.600948	0.673144	0.0621609	9.23442	4		0.471557	0.198201	b3776
	b0082	mraW	S-adenosyl-dependent methyltransferase activity on membrane-located substrates			1.89887	6.32575	0.945833	1.42235	0.673896	47.3791	3		0.89883	2.85377	0.803133	0.776689	0.213573	0.673056	0.310783	46.1749	5		0.473201	0.361129	b0082
	b1181	ycgN	conserved protein	2.49142	1.77321	1.05691	1.06383	0.979701	1.47302	0.654063	44.403	5		1.09103	0.476927		0.605526	0.622283	0.698943	0.269339	38.5352	4		0.474498	0.0564211	b1181
	b0947	ycbX	predicted 2Fe-2S cluster-containing protein	3.3604	0.764004		3.21458	2.0788	2.35444	1.20516	51.1867	4		1.83126	0.825438	0.914052	0.85551	1.17361	1.11997	0.420683	37.5619	5		0.475685	0.130288	b0947
	b1755	ynjC	fused transporter subunits of ABC superfamily: membrane components	0.78978	4.71941	0.515929	2.34578	0.970556	1.86829	1.74319	93.304	5		0.92862	0.88962	0.984297	0.796197	0.851893	0.890126	0.0718237	8.06894	5		0.476438	0.27802	b1755
	b1651	gloA	glyoxalase I, Ni-dependent	1.81572	1.05354	1.43947	1.50868	0.98561	1.3606	0.34285	25.1984	5		0.847232	0.429118	0.579122	0.575939	0.82204	0.65069	0.178741	27.4695	5		0.478237	0.00626204	b1651
	b2123	yehR	conserved protein	3.10736			2.4478	0.865221	2.14013	1.1523	53.8425	3		0.810909	1.43799	1.13926	0.717474		1.02641	0.32864	32.0185	4		0.479602	0.231959	b2123
	b1826	mgrB	predicted protein	0.64463	0.853405	0.934393	1.30461	0.91157	0.929721	0.238742	25.6789	5		0.514296		0.665471	0.295186	0.309082	0.446009	0.177316	39.7562	4		0.479723	0.0102186	b1826
	b1731	cedA	cell division modulator	1.03914	1.14281	1.08631	1.79824	1.21859	1.25702	0.309859	24.6504	5		0.76686	0.607299	0.474087	0.431131	0.746789	0.605233	0.153033	25.285	5		0.481484	0.00592052	b1731
	b2582	trxC	thioredoxin 2	0.612439	1.56644	1.57678	0.270626	1.16694	1.03865	0.582264	56.0599	5		0.53978	0.480539		0.481035		0.500451	0.0340605	6.80595	3		0.48183	0.107549	b2582
	b3151	yraQ	predicted permease	0.781597			1.31073	2.43224	1.50819	0.842849	55.8849	3		0.699965	0.535265		0.698259	0.999409	0.733224	0.193538	26.3955	4		0.486163	0.24969	b3151
	b1815	yoaD	predicted phosphodiesterase		1.63022		0.902151	1.33779	1.29005	0.366374	28.3999	3		0.832099	0.466933	0.488817	0.733756		0.630401	0.180861	28.6898	4		0.488662	0.071567	b1815
	b2230	yfaA	predicted protein			1.13684	9.4221	1.78482	1.46083	0.458197	31.3656	3		0.81162	0.78153	0.664252	0.60166		0.714765	0.0986283	13.7987	4		0.489287	0.329526	b2230
	b2277	nuoM	NADH:ubiquinone oxidoreductase, membrane subunit M	1.55608		0.878037	0.799351	1.13688	1.09259	0.340983	31.2087	4		0.252035	0.703731	0.652821		1.44082	0.536196	0.247403	46.1405	4		0.490758	0.319283	b2277
	b2384	ypdE	predicted peptidase	1.07408	1.45917			3.95955	1.26662	0.272299	21.4981	3			0.60506	0.369517	0.845111	0.674558	0.623561	0.197117	31.6115	4		0.492303	0.22957	b2384
	b0616	citE	citrate lyase, citryl-ACP lyase (beta) subunit		0.893396	0.52126	2.62665	8.59795	1.3471	1.12364	83.4113	4		0.616005		0.669851		0.714601	0.666819	0.0493683	7.40355	3		0.495002	0.274653	b0616
	b2919	scpB	methylmalonyl-CoA decarboxylase, biotin-independent	4.06948		0.713161		1.0577	1.94678	1.84637	94.842	3		1.73753	0.738783	0.80448	0.775742	0.767434	0.964794	0.432607	44.8393	5		0.495584	0.455237	b2919
	b1582	ynfA	conserved inner membrane protein		1.25699	0.941684		0.969047	1.05591	0.174679	16.5431	3		0.685985	0.377123		0.221461	0.812962	0.524383	0.272544	51.9742	4		0.496618	0.0261155	b1582
	b4060	yjcB	predicted inner membrane protein	1.38587	0.582972	1.40629	1.34399	1.08043	1.15991	0.348146	30.0149	5		0.551288	0.461935	0.657556	0.602464	0.60935	0.576518	0.0743037	12.8883	5		0.497037	0.0184628	b4060
	b0691				5.62485	1.60864	3.52886	1.06235	2.06662	1.29546	62.6852	4		4.82566			1.04498	1.02629	1.03564	0.013216	1.27613	3		0.501127	0.706607	b0691
	b0382	iraP	predicted protein		0.812106	1.69619		1.50011	1.33614	0.464291	34.7488	3		0.810254	0.538175	0.663674	0.511777	0.828107	0.670397	0.147581	22.014	5		0.501744	0.123602	b0382
	b1785	yeaI	predicted diguanylate cyclase		1.52357		0.747371	1.18842	1.15312	0.389302	33.7608	3		0.746809	0.460918		0.528748		0.578825	0.149379	25.8073	3		0.501965	0.111317	b1785
	b1283	osmB	lipoprotein	3.00696	0.989323		1.93074	0.93825	1.71632	0.973934	56.7455	4		0.929971	0.790333	0.78371	0.756663	1.04716	0.861567	0.123757	14.3642	5		0.501985	0.177188	b1283
	b3570	bax	conserved protein	0.389371	0.644671	0.478515	1.15103	0.871092	0.706937	0.308655	43.6609	5		0.42734	0.191028	0.394327	0.339164	0.43708	0.357788	0.100767	28.1638	5		0.50611	0.0629101	b3570
	b0779	uvrB	excinulease of nucleotide excision repair, DNA damage recognition component	0.381992	6.38781	0.428419	0.304111	0.64648	1.62976	2.66287	163.39	5			0.629222	0.675023	0.923916	1.08032	0.827119	0.21274	25.7206	4		0.507509	0.538246	b0779
	b3467	yhhM	conserved protein			2.30418	0.189801	1.78064	2.04241	0.370201	18.1257	3		1.19503	1.21515	0.719524			1.04324	0.280523	26.8897	3		0.510786	0.613598	b3467
	b1356	racR	Rac prophage; predicted DNA-binding transcriptional regulator		3.27458	1.11076	2.36574	1.2215	1.99314	1.0255	51.4512	4		0.521117		1.36879	0.909421	1.27627	1.0189	0.386625	37.9453	4		0.511202	0.153112	b1356
	b0570	cusS	sensory histidine kinase in two-component regulatory system with CusR, senses copper ions	2.3834	1.22925		3.31897	1.00176	1.98334	1.07643	54.2736	4		1.11194		0.932397	25.3969		1.02217	0.126957	12.4204	3		0.515377	0.471089	b0570
	b3836	tatA	TatABCE protein translocation system subunit	1.22937	0.9953	0.89134	1.41629	1.13748	1.13396	0.204278	18.0146	5		0.57153	0.434641	0.613129	0.565379	0.75018	0.586972	0.113171	19.2804	5		0.517632	0.00171887	b3836
	b1166	ymgB	predicted protein	3.32192		0.936833	4.51262	0.863073	2.40861	1.80885	75.0992	4		1.02334	1.31118		1.10924	1.54661	1.24759	0.233016	18.6772	4		0.517971	0.290049	b1166
	b0327	yahM	predicted protein	0.293431	1.30073	0.400561		0.948015	0.735684	0.473376	64.345	4		0.453739	0.360145	0.16393	0.505966	0.433824	0.383521	0.133436	34.7923	5		0.521312	0.234862	b0327
	b0282	yagP	predicted transcriptional regulator	1.44576	1.84656		0.958753	0.871122	1.28055	0.454182	35.4678	4		0.813597	0.625961	0.771508	0.604069	0.524874	0.668002	0.120677	18.0653	5		0.521653	0.0704148	b0282
	b1571	ydfA	Qin prophage; predicted protein			1.45086	3.30918	1.39406	2.05136	1.08967	53.1192	3		0.911353	1.02444	1.2805			1.0721	0.189133	17.6414	3		0.522627	0.257972	b1571
	b3070	yqjH	predicted siderophore interacting protein	0.499182	1.46698	0.542519	1.15366	1.28875	0.990219	0.442914	44.7289	5		0.682893	0.593465	0.566805	0.310733	0.456808	0.522141	0.143078	27.4022	5		0.527298	0.0763235	b3070
	b3086	ygjQ	predicted thioredoxin-like protein	1.82189	0.816274	0.661057	1.59282	1.01624	1.18166	0.502705	42.5424	5		0.871759	0.558061	0.580185	0.648124	0.459276	0.623481	0.154408	24.7654	5		0.527633	0.0663952	b3086
	b1807	yeaZ	predicted peptidase	0.821317	1.70324	0.717955		0.990244	1.05819	0.444438	41.9999	4				0.473826	0.507434	0.697712	0.559657	0.120734	21.5728	3		0.528882	0.10734	b1807
	b3953	frwD	predicted enzyme IIB component of PTS		1.17627	0.982874	1.88122	1.12884	1.2923	0.401146	31.0412	4		0.629765		0.843521	0.834985	0.427734	0.684001	0.197364	28.8543	4		0.52929	0.0480858	b3953
	b1563	relE	Qin prophage; toxin of the RelE-RelB toxin-antitoxin system			1.83517	24.6842	1.97846	1.90681	0.101321	5.31362	3		0.521902	0.970025	1.59763	0.953447		1.01075	0.442846	43.8136	4		0.530073	0.379831	b1563
	b3556	cspA	major cold shock protein	0.6528	0.710682	1.48236	0.247845	0.720639	0.762865	0.447084	58.6059	5		0.255376	0.17659	0.546566	0.314497	0.733402	0.405286	0.229477	56.6208	5		0.531269	0.16294	b3556
	b2067	yegE	predicted diguanylate cyclase, GGDEF domain signalling protein	4.81663	2.1706		14.398	0.896111	2.62778	1.99984	76.104	4		1.60213	2.16554	0.422242			1.39664	0.889632	63.6981	3		0.53149	0.26599	b2067
	b1878	flhE	conserved protein	0.574886			3.68048	0.838965	1.69811	1.72185	101.398	3		1.35753	0.735262	0.967718	0.669524	0.783626	0.902731	0.277344	30.7228	5		0.531609	0.508277	b1878
	b2362	yfdS	CPS-53 (KpLE1) prophage; predicted protein	3.81017			2.3197	1.00975	2.37987	1.40118	58.8763	3		1.24396	1.10549	1.54127	1.12501	1.32307	1.26776	0.176875	13.9518	5		0.5327	0.302541	b2362
	b1771	ydjG	predicted oxidoreductase	2.39028	2.06349	1.0255	3.03877	0.74851	1.85331	0.954419	51.4981	5		0.995893	1.13901		0.979727	0.835689	0.98758	0.124007	12.5567	4		0.532874	0.112321	b1771
	b2972	pppA	bifunctional prepilin leader peptidase/ methylase		2.81501		2.04801	1.72189	2.19497	0.561184	25.5668	3			2.10755	0.792904	0.727669	1.05157	1.16992	0.640542	54.7507	4		0.533002	0.0767626	b2972
	b3691	dgoT	D-galactonate transporter		0.42995	1.03599	1.54681	0.821145	0.958475	0.465599	48.5771	4		1.99635		0.601048		0.42551	0.513279	0.124124	24.1825	3		0.535517	0.934479	b3691
	b1539	ydfG	L-allo-threonine dehydrogenase, NAD(P)-binding	0.907486	1.67042	1.02594	1.03664	1.15963	1.16002	0.298951	25.7711	5		0.669048	0.754973	0.534243	0.663491	0.486431	0.621637	0.109198	17.5662	5		0.535884	0.0126269	b1539
	b1836	yebV	predicted protein	2.40975		0.645907	1.43402	1.00056	1.37256	0.762876	55.5806	4		1.02498	0.65192	0.648341	0.600068	0.756273	0.736317	0.171138	23.2424	5		0.536455	0.193658	b1836
	b3791	rffA	TDP-4-oxo-6-deoxy-D-glucose transaminase	3.67241			1.35987	2.24596	2.42608	1.16674	48.0917	3			1.94725	1.17988		0.784627	1.30392	0.591154	45.3367	3		0.537461	0.235053	b3791
	b1147	ymfL	e14 prophage; predicted DNA-binding transcriptional regulator	3.50802		1.46083	1.86248	1.09216	1.98087	1.06559	53.7941	4		0.541934	1.2881	1.14964	1.1179	1.24636	1.06879	0.302553	28.3081	5		0.539553	0.185116	b1147
	b3378	yhfU	predicted protein	0.351528	0.258944	1.61802	0.434219	1.48041	0.828624	0.66251	79.9531	5		0.201774	0.318249	0.949177	0.322858	1.19001	0.448014	0.338773	75.6166	5		0.540673	0.535552	b3378
	b2157	yeiE	predicted DNA-binding transcriptional regulator		1.60169	2.42311	2.08269	1.03277	1.78506	0.604223	33.8488	4		1.15493	0.948339	0.796938			0.966736	0.179704	18.5887	3		0.541569	0.067961	b2157
	b3382	yhfY	conserved protein	1.90433			0.819585	1.52863	1.41751	0.550842	38.8597	3		1.02066	0.754289		0.585742	0.719636	0.770081	0.182176	23.6568	4		0.543262	0.17106	b3382
	b1890	motA	proton conductor component of flagella motor	2.31936	0.796633	0.804792	1.9185	0.900698	1.348	0.719057	53.3426	5		0.798602	0.58434	0.670762	0.669996	0.950902	0.73492	0.142924	19.4476	5		0.545194	0.129601	b1890
	b2237	inaA	conserved protein	0.470284	0.62829	1.25887	0.290079	0.541684	0.637841	0.368792	57.8188	5		0.315085	0.293117	0.292268	0.250699	0.590404	0.348314	0.137321	39.4244	5		0.546083	0.15985	b2237
	b4275			0.280185	0.650027	0.550989	1.2321	0.628308	0.668322	0.347922	52.059	5		0.377127	0.4312	0.419392	0.274842	0.323929	0.365298	0.0657703	18.0045	5		0.54659	0.123453	b4275
	b1811	yoaH	conserved protein	1.61656			0.704479	1.23925	1.18676	0.458302	38.6178	3		0.617464	0.955463	0.496718	0.521534	0.661385	0.650513	0.183367	28.188	5		0.54814	0.171255	b1811
	b4067	actP	acetate transporter	0.598472	1.34797	0.653466	1.17868	0.876923	0.931102	0.326241	35.0382	5			0.568818	0.452011	0.479369	0.544061	0.511065	0.0545165	10.6672	4		0.548881	0.043822	b4067
	b4148	sugE	multidrug efflux system protein	0.0894754	0.817244	0.72847	0.301073	0.495408	0.486334	0.300013	61.6888	5		0.184786	0.413811		0.201335	0.268169	0.267025	0.104285	39.0543	4		0.549057	0.186523	b4148
	b0791	ybhQ	predicted inner membrane protein	1.53465		1.04852	0.849491	1.35277	1.19636	0.306092	25.5853	4		0.356678	0.709497		0.621558	0.957442	0.661294	0.247923	37.4906	4		0.552756	0.0363062	b0791
	b2265	menF	isochorismate synthase 2		1.24542	1.30509	0.235887	3.11844	1.47621	1.1997	81.2692	4		0.207633	0.278566	1.43095		1.34899	0.816537	0.663625	81.2732	4		0.553131	0.382949	b2265
	b2171	yeiP	predicted elongtion factor	1.72125	1.19786	0.733966	1.77981	1.01896	1.29037	0.451946	35.0245	5		0.840581	0.802788	0.728744	0.623896	0.572882	0.713778	0.114189	15.9978	5		0.553157	0.0442779	b2171
	b0985	gfcC	conserved protein	3.77781	1.79806	1.69687	14.4668	1.20915	2.12047	1.13441	53.4981	5		0.956035	1.2514	1.52703	0.999541	1.13425	1.17365	0.229209	19.5295	5		0.553485	0.244948	b0985
	b2108	yehA	predicted fimbrial-like adhesin protein		3.0076	1.99935	0.608823	1.95041	1.89155	0.984215	52.0323	4		0.321709		1.08934		1.73593	1.04899	0.707974	67.4908	3		0.554569	0.244962	b2108
	b0667			0.0859792	0.373401	0.276926	0.0722402	0.78106	0.317921	0.288709	90.8116	5		0.321125	0.290804	0.112031	0.0829248	0.0753057	0.176438	0.119514	67.7371	5		0.554974	0.35503	b0667
	b1529	marC	predicted transporter	1.07257	2.03279	1.10346	0.631436	1.45969	1.25999	0.52245	41.4646	5		0.625992	0.451545	0.734938	0.646556	1.04063	0.699932	0.216398	30.917	5		0.555506	0.0742934	b1529
	b0623	cspE	DNA-binding transcriptional repressor	1.35954		1.58591	0.49063	1.29803	1.18353	0.478228	40.4071	4		0.761885	0.732551	0.765298	0.498922	0.530492	0.65783	0.131745	20.0272	5		0.555822	0.112604	b0623
	b3661	nlpA	cytoplasmic membrane lipoprotein-28	5.38657		1.25542	267.986	0.708636	2.45021	2.42112	98.8128	4		1.10278	6.66754	1.624			1.36339	0.368558	27.0324	3		0.556439	0.395372	b3661
	b4282			1.00748		1.09933	1.06057	1.03594	1.05083	0.0389366	3.70532	4		0.400328		0.670435		0.68392	0.584894	0.159981	27.3522	3		0.556602	0.0324527	b4282
	b3589	yiaY	predicted Fe-containing alcohol dehydrogenase	0.357626		0.575952	0.471705	0.88346	0.572186	0.22586	39.4732	4		0.190569	0.502715	0.181655	0.412877	0.305188	0.318601	0.139743	43.8614	5		0.556813	0.109248	b3589
	b0078	ilvH	acetolactate synthase III, thiamin-dependent, small subunit	0.848157			2.51211	1.05322	1.47116	0.907301	61.6724	3		1.19283	0.804228	0.475412	0.755752	0.868503	0.819345	0.257133	31.3828	5		0.556937	0.338734	b0078
	b2012	yeeD	conserved protein	1.74653			1.74558	0.981248	1.49112	0.441561	29.6128	3		0.831466	0.809157	0.651888	1.0397	0.828398	0.832123	0.137946	16.5776	5		0.558052	0.115371	b2012
	b4277	yjgZ	KpLE2 phage-like element; predicted protein	2.76706	0.635644		1.13939	1.9242	1.61657	0.932411	57.6783	4		1.16155	0.793815	1.06535	0.93588	0.557939	0.902906	0.237315	26.2835	5		0.558531	0.223997	b4277
	b2733	mutS	methyl-directed mismatch repair protein	1.69736	3.5101	0.411374	2.25939	1.58485	1.89261	1.12669	59.5307	5		11.5415	0.798078	1.33105	1.11289	0.991183	1.0583	0.223305	21.1003	5		0.559175	0.586921	b2733
	b3013	yqhG	conserved protein	1.34696	0.89026	0.818051	1.78021	0.937857	1.15467	0.405742	35.1393	5		0.832501	0.567601	0.48952	0.577626	0.761639	0.645777	0.144449	22.3682	5		0.559276	0.0458799	b3013
	b1122	ymfA	predicted inner membrane protein	0.606587	2.30582		1.18845	1.30578	1.35166	0.705759	52.2142	4		0.689292	0.649706	0.740331	0.660054	1.04513	0.756902	0.164917	21.7884	5		0.559979	0.190175	b1122
	b1061	dinI	DNA damage-inducible protein I	1.1043		1.11413	2.05246	0.926907	1.29945	0.509327	39.1956	4		0.318009		0.965341	0.903833		0.729061	0.357307	49.0092	3		0.561055	0.142276	b1061
	b2749	ygbE	conserved inner membrane protein	0.252711		1.08746	0.14181	1.02395	0.626482	0.498361	79.5491	4		0.245179	0.318822	0.461203	0.386698		0.352975	0.0924427	26.1896	4		0.563425	0.354909	b2749
	b4176	yjeT	conserved inner membrane protein	1.66454	0.670671	1.2555	2.66186	0.927912	1.4361	0.77965	54.2896	5		0.804777	0.826104	0.713823	0.762714	0.951414	0.811766	0.0890997	10.976	5		0.565259	0.148028	b4176
	b3478	nikC	nickel transporter subunit	0.269016	0.2518	1.24387	0.215365	1.57365	0.71074	0.64807	91.1825	5		0.0929305			0.259586	0.854264	0.40226	0.400218	99.4922	3		0.565974	0.437558	b3478
	b1499	ydeO	predicted DNA-binding transcriptional acfivator			1.40427	2.38043	1.51105	1.76525	0.535433	30.3319	3			0.919078	1.17844	0.907351		1.00162	0.153243	15.2994	3		0.567412	0.123058	b1499
	b1281	pyrF	orotidine-5'-phosphate decarboxylase	1.34223			0.464514	1.43997	1.08224	0.537193	49.6372	3		0.450087	0.376089	0.589294	0.504099	1.15264	0.614442	0.310761	50.5762	5		0.567751	0.26758	b1281
	b0541	insF	IS3 element protein InsF	0.384412	1.15924	1.02114	1.55763	0.96251	1.01699	0.422986	41.5921	5		0.624563	0.570816	0.359713	0.888607	0.450777	0.578895	0.201574	34.8204	5		0.569225	0.0837326	b0541
	b1027	insE	IS3 element protein InsE	1.5061			1.91801	1.46657	1.63023	0.250011	15.336	3			0.758505	1.2899		0.736496	0.928302	0.31335	33.7552	3		0.569431	0.0411695	b1027
	b2498	upp	uracil phosphoribosyltransferase	1.0472	0.914749	1.23071	0.78144	1.71601	1.13802	0.36329	31.9229	5		0.668044	0.523506	0.616366	0.722578	0.710125	0.648124	0.081121	12.5163	5		0.569517	0.0376033	b2498
	b2144	sanA	predicted protein	0.659969	1.37825	1.41719	0.321587	1.24479	1.00436	0.488061	48.5944	5		0.273157	0.561074	0.638292	0.550328	0.844071	0.573384	0.205124	35.7743	5		0.570897	0.124324	b2144
	b4106	phnC	phosphonate/organophosphate ester transporter subunit	2.39281	2.00109	0.437192	2.05868	0.695624	1.51708	0.88536	58.3595	5		0.954483	0.903413	0.907978	0.89338	0.674134	0.866678	0.110172	12.7119	5		0.57128	0.176278	b4106
	b4334	yjiL	predicted ATPase, activator of (R)-hydroxyglutaryl-CoA dehydratase	0.41942	0.671042	0.618377	0.339475	1.16417	0.642496	0.322149	50.1403	5		0.181444	0.371943			0.547751	0.367046	0.183203	49.9127	3		0.571281	0.174273	b4334
	b1016				1.38857		19.2976	1.9109	1.64973	0.369346	22.3882	3		5.78945	0.895484	0.879808	1.19295	0.822012	0.947564	0.166614	17.5834	5		0.574374	0.441287	b1016
	b3840				1.12004	0.734579	1.50531	0.828619	1.04714	0.346735	33.1127	4				0.539417	0.563123	0.710512	0.604351	0.0926996	15.3387	3		0.577147	0.0792304	b3840
	b2480	bcp	thiol peroxidase, thioredoxin-dependent	2.54831		0.687967	0.96249	1.46027	1.41476	0.820526	57.9976	4			0.876693	0.745743	0.829529		0.817322	0.066323	8.11468	3		0.577711	0.241467	b2480
	b0724	sdhB	succinate dehydrogenase, FeS subunit	2.36754	0.73571	1.2864	3.20717	0.81445	1.68225	1.07246	63.7515	5				0.899948	0.924927	1.11043	0.978435	0.114991	11.7525	3		0.581621	0.217214	b0724
	b3406	greB	transcription elongation factor	0.545505	1.37934	0.973537	0.775369	0.921791	0.919109	0.306197	33.3145	5		0.473286	0.421018	0.455506	0.591893	0.733197	0.53498	0.1281	23.9449	5		0.582064	0.0458688	b3406
	b3042	yqiC	conserved protein	1.81673	1.18764	1.27843	1.15676	0.987196	1.28535	0.315195	24.5221	5		0.855479	0.746427	0.744005	0.725836	0.670561	0.748462	0.0671886	8.9769	5		0.582301	0.0174487	b3042
	b0288	ykgJ	predicted ferredoxin	2.06399	1.99925	1.73083	0.968616	1.10289	1.57312	0.508418	32.3191	5		0.577127	1.01795	1.06601	0.935263	0.992399	0.917751	0.196167	21.3748	5		0.583396	0.0419294	b0288
	b3818	yigG	predicted inner membrane protein	1.42489	1.76963	1.08262	0.972347	1.35713	1.32132	0.312949	23.6846	5		0.553662	0.882368	0.965773	0.544732	0.912881	0.771883	0.205486	26.6214	5		0.584175	0.0137107	b3818
	b2672	ygaM	predicted protein	2.27369		0.7858	2.24988	1.00212	1.57787	0.794696	50.365	4			0.951864		0.971621	0.843776	0.922421	0.0688205	7.46086	3		0.584597	0.19748	b2672
	b2614	grpE	heat shock protein	0.47698	0.45068	2.42419	0.713815	1.88661	1.19045	0.906948	76.1851	5		0.0835531		1.48829	0.518102		0.69665	0.71919	103.235	3		0.585197	0.432012	b2614
	b2326	yfcM	conserved protein	2.29077	0.91316	1.22081	1.21475	1.32498	1.39289	0.524949	37.6877	5		0.409152	0.982472	0.568797	1.08298	1.03424	0.815529	0.305473	37.457	5		0.585493	0.0746045	b2326
	b0528	ybcJ	predicted RNA-binding protein	5.70856			0.74223	1.26135	1.00179	0.367074	36.6418	3		0.743335	0.438721		0.436342	0.727824	0.586555	0.172197	29.3574	4		0.585507	0.335002	b0528
	b2901	bglA	6-phospho-beta-glucosidase A			1.74725	2.11996	1.00743	1.62488	0.566271	34.85	3			4.12003	0.773567	1.2906	0.793156	0.95244	0.293017	30.7649	4		0.58616	0.896969	b2901
	b2653			3.46779			1.626	0.662681	1.91882	1.42529	74.2796	3		1.36978			0.744179	1.26586	1.12661	0.335244	29.757	3		0.587134	0.439052	b2653
	b2181	yejG	predicted protein	0.999319	1.61035	0.80002	1.73527	1.12048	1.25309	0.402303	32.105	5		0.87479	0.622221	0.760419		0.698627	0.739014	0.106716	14.4403	4		0.589755	0.0437447	b2181
	b1552	cspI	Qin prophage; cold shock protein			1.59631	1.37165	1.1563	1.37476	0.220022	16.0044	3		0.34505	0.727193	2.52868	1.0456	1.13498	0.813206	0.357824	44.0016	5		0.591527	0.601308	b1552
	b2863			0.791793			1.17825	0.739534	0.903192	0.239635	26.532	3		0.546671	0.421748	0.412135	0.515992	0.776363	0.534582	0.147203	27.536	5		0.591881	0.0973436	b2863
	b4326	yjiD	DNA replication/recombination/repair protein	2.10553	0.906124		1.25628	0.891846	1.28994	0.569242	44.1292	4		0.898933			0.751084	0.644978	0.764998	0.127548	16.673	3		0.593048	0.161427	b4326
	b4083	yjcS	predicted alkyl sulfatase	6.34485	1.12824			0.871922	1.00008	0.181244	18.1229	3			0.583946	0.453496	0.746833		0.594758	0.146967	24.7104	3		0.59471	0.344772	b4083
	b1799	yeaT	predicted DNA-binding transcriptional regulator	3.61002	0.886366	1.33985	1.58967	1.44401	1.77398	1.05951	59.7247	5		0.609676	1.4557	1.0457	1.12551		1.05914	0.348263	32.8815	4		0.597044	0.215583	b1799
	b3950	frwB	predicted enzyme IIB component of PTS	1.29037	1.20749	1.51049	1.52362	1.41688	1.38977	0.138142	9.9399	5		0.30905	1.05122	0.822098		1.14588	0.832062	0.374234	44.9767	4		0.598705	0.0525245	b3950
	b3695			2.00069		0.873145	13.6448	1.10834	1.32739	0.594832	44.8122	4		0.501739	1.05617	1.10107	0.633056	0.68296	0.795	0.267709	33.6741	5		0.59892	0.326828	b3695
	b1003	yccJ	predicted protein	1.93919	1.37142	1.48195	1.25571	1.10577	1.43081	0.316586	22.1264	5		0.843755	0.902715		0.82428	0.861454	0.858051	0.0334228	3.8952	4		0.599697	0.0150546	b1003
	b1887	cheW	purine-binding chemotaxis protein		1.08398	0.906706	1.30495	0.951404	1.06176	0.178751	16.8353	4		0.689707	0.628467	0.547148		0.692705	0.639507	0.0683179	10.6829	4		0.602308	0.0125449	b1887
	b3254			1.27977	1.14282	1.09389	1.29442	1.14668	1.19152	0.0898453	7.54042	5		0.964166	0.793702	0.725085	0.588412	0.517805	0.717834	0.175535	24.4534	5		0.602455	0.00174515	b3254
	b1314	ycjR	predicted enzyme	1.86524	1.00331		1.39057	1.00943	1.31713	0.407831	30.9635	4		0.556787	0.97721	0.846833			0.79361	0.215205	27.1173	3		0.602528	0.083631	b1314
	b2518	ndk	multifunctional nucleoside diphosphate kinase and apyrimidinic endonuclease and 3'-phosphodiesterase	1.03552	1.33548	1.54039	1.07581	1.32963	1.26337	0.208221	16.4814	5		0.895173	0.583525	0.654011	0.685752	0.98901	0.761494	0.172189	22.612	5		0.60275	0.00344513	b2518
	b1407	ydbD	predicted protein		1.28793	1.29535	2.44122	1.84224	1.71669	0.548351	31.9424	4		0.635126	1.32154	1.22715		0.957989	1.03545	0.308141	29.7592	4		0.603168	0.0857588	b1407
	b0525	ppiB	peptidyl-prolyl cis-trans isomerase B (rotamase B)	1.29218	1.43405	1.12359	0.602344	1.23816	1.13807	0.319604	28.0831	5		0.655836	0.558112		0.689663	0.846685	0.687574	0.119845	17.4301	4		0.60416	0.0312244	b0525
	b0966	hspQ	DNA-binding protein, hemimethylated	0.542162	8.91557	1.35911	0.943809	0.850119	0.923799	0.33713	36.4938	5		0.382352	0.497359	0.498924	0.73652	0.676196	0.55827	0.144792	25.9358	5		0.60432	0.288045	b0966
	b1591	dmsD	twin-argninine leader-binding protein for DmsA and TorA	2.07162			4.9769	1.3017	2.78341	1.93823	69.6352	3		2.04467	1.52477	1.80509	1.35669		1.6828	0.30399	18.0645	4		0.604584	0.429403	b1591
	b1387	maoC	fused aldehyde dehydrogenase/enoyl-CoA hydratase		1.53121		2.88469	1.0806	1.83217	0.938947	51.2479	3		0.951891	1.16832	1.25279	0.940833	1.22882	1.10853	0.151255	13.6446	5		0.605038	0.313002	b1387
	b3713	yieF	chromate reductase, Class I, flavoprotein			0.916265	1.69316	1.87419	1.49454	0.508913	34.0515	3		0.62203	0.875985	1.16763	0.864522	1.00401	0.906837	0.200821	22.1452	5		0.606767	0.175146	b3713
	b4311	nanC	N-acetylnuraminic acid outer membrane channel protein	1.39425	1.1953	1.66465	0.356873	2.6161	1.44543	0.816803	56.5092	5		0.669266			0.60258	1.35965	0.877166	0.419174	47.7872	3		0.606853	0.242472	b4311
	b4338			0.848887			1.99536	0.851463	1.2319	0.661176	53.6711	3		0.981966	0.780061	0.627634	0.542673	0.816063	0.749679	0.171051	22.8166	5		0.608553	0.333036	b4338
	b3088	alx	predicted inner membrane protein, part of terminus			0.545145	1.50407	1.12171	1.05697	0.482727	45.6707	3		0.852399	0.661209			0.41645	0.643352	0.218522	33.9662	3		0.608674	0.275626	b3088
	b1536	ydeI	conserved protein	3.96648	0.621277	1.40024	1.52704	0.990181	1.70104	1.31569	77.3463	5		0.711418	0.950472		0.816484	1.66389	1.03557	0.430157	41.5383	4		0.608783	0.336518	b1536
	b4030	psiE	predicted phosphate starvation inducible protein	0.870554		0.955141	1.02705	0.864871	0.929403	0.0770811	8.29361	4		0.758834	0.460374	0.597585	0.447641		0.566109	0.145313	25.6688	4		0.60911	0.00854108	b4030
	b4128	yjdK	predicted protein		2.86301		1.75727	1.17105	1.93044	0.859171	44.5064	3		1.10179	1.16255	1.23881	1.05334	1.33253	1.1778	0.110865	9.41285	5		0.610121	0.267827	b4128
	b0396	araJ	predicted transporter	2.05989	0.729754	0.777464	1.71394	1.42399	1.34101	0.581801	43.3854	5			1.48142	0.440392	0.731658	0.622481	0.818987	0.45767	55.8825	4		0.610725	0.175663	b0396
	b2052	fcl	bifunctional GDP-fucose synthetase: GDP-4-dehydro-6-deoxy-D-mannose epimerase/ GDP-4-dehydro-6-L-deoxygalactose reductase		1.98132	1.63758	1.44648	1.08404	1.53736	0.374564	24.3642	4		0.793677	0.97132	0.719339	1.27281		0.939287	0.246201	26.2115	4		0.610976	0.0428363	b2052
	b1547	ydfN	Qin prophage; predicted side tail fibre assembly protein	5.14686			1.40687	1.65233	2.73535	2.09203	76.4812	3		1.13139		1.73855		2.16011	1.67669	0.517144	30.8432	3		0.612968	0.475926	b1547
	b1667	ydhR	predicted protein			1.27767	6.95927	1.26499	1.27133	0.00896556	0.705211	3		0.897373	0.803645		0.713235	0.705013	0.779816	0.0902144	11.5687	4		0.613386	0.334982	b1667
	b2225	yfaP	conserved protein	0.804377	3.28281	0.857024	2.8811	0.708935	1.70685	1.26442	74.079	5			0.925121	1.48329	1.04393	0.736238	1.04714	0.317167	30.2888	4		0.613495	0.316304	b2225
	b0720	gltA	citrate synthase	0.386522		1.9869	0.434141	1.33084	1.0346	0.769239	74.3513	4		0.430125	0.45551	0.746254	0.504659	1.03805	0.63492	0.25788	40.6162	5		0.613687	0.382597	b0720
	b0649	djlC	Hsc56 co-chaperone of HscC	0.614279	1.84957		1.79879	0.892954	1.2889	0.628815	48.787	4		0.824839	0.64116	0.914008			0.793336	0.139125	17.5368	3		0.615515	0.214023	b0649
	b4324	uxuR	DNA-binding transcriptional repressor	1.50889	1.05948	0.793949	0.778582	0.905252	1.00923	0.301057	29.8303	5		0.656555	0.870703	0.507251	0.480906	0.592163	0.621516	0.155733	25.057	5		0.615832	0.0430533	b4324
	b0602	ybdN	conserved protein		1.46273	1.2187	3.02264	1.29656	1.75016	0.854405	48.8187	4		1.06488	36.8632	1.37148	1.09269	0.784121	1.07829	0.240059	22.2629	5		0.616112	0.416573	b0602
	b0349	mhpC	2-hydroxy-6-ketonona-2,4-dienedioic acid hydrolase	0.779151		1.05493	1.3326	0.866538	1.00831	0.244917	24.29	4			0.689678	0.645264		0.52914	0.621361	0.0828953	13.3409	3		0.616242	0.0442851	b0349
	b0220	ivy	inhibitor of vertebrate C-lysozyme	1.17034	0.791185	1.0096	1.57638	1.13016	1.13553	0.287236	25.2953	5		0.467019	0.557099	0.987861	0.678152	0.818041	0.701634	0.207342	29.5513	5		0.61789	0.0278923	b0220
	b1461	pptA	4-oxalocrotonate tautomerase	5.00898	2.3603	1.16114	3.38486	1.23234	2.03466	1.05449	51.8261	5		1.24034	1.25324	1.24949	1.02998	1.5155	1.25771	0.172269	13.6971	5		0.618142	0.130094	b1461
	b2655			2.12568	1.53916	1.5854	1.19655	0.765398	1.44244	0.503851	34.9305	5		0.657345	1.05321	0.548361	0.976094	1.22455	0.891911	0.281424	31.5529	5		0.618336	0.0748826	b2655
	b1310	ycjN	predicted sugar transporter subunit: periplasmic-binding component of ABC superfamily		1.39284	1.88316	1.91255	1.12194	1.57762	0.386144	24.4764	4		0.937938	13.9807	1.09357	0.967247	0.905252	0.976001	0.0823666	8.43919	5		0.618654	0.485663	b1310
	b1659	ydhB	predicted DNA-binding transcriptional regulator	2.76906	3.41879		1.32312	0.925182	2.10904	1.17902	55.9032	4		0.875628	1.35722	1.60096	1.25588	1.46068	1.31007	0.274409	20.9461	5		0.621172	0.269819	b1659
	b1695	ydiO	predicted acyl-CoA dehydrogenase	3.06885		1.20348	2.39699	1.34636	2.00392	0.887255	44.2759	4		0.769924	1.35104	1.75497	1.08252	1.26669	1.24503	0.361897	29.0674	5		0.621296	0.187014	b1695
	b1934				1.92795	1.7654		1.32886	1.67407	0.309813	18.5066	3		0.40319	0.878434	1.29474	0.890192	1.73406	1.04012	0.500172	48.0877	5		0.621314	0.0694608	b1934
	b3421	rtcB	conserved protein	0.907782			0.76917	1.10012	0.92569	0.166199	17.954	3		24.3362	0.740635	0.338596		0.647838	0.575689	0.210506	36.566	4		0.621903	0.416155	b3421
	b1257	yciE	conserved protein		2.30526	1.18023	1.99685	1.48184	1.74105	0.505132	29.0131	4			1.14349	1.07306	0.824619	1.29711	1.08457	0.196935	18.1579	4		0.622941	0.0744108	b1257
	b2073	yegL	conserved protein		0.991984	0.554497	1.18502	3.44638	0.910501	0.323064	35.482	4		1.74747	0.508707	0.476099	0.724681		0.569829	0.135093	23.7076	4		0.625841	0.391651	b2073
	b3598	yibI	predicted inner membrane protein	1.78188	1.71399	1.2813	0.621022	1.57597	1.39483	0.473328	33.9343	5		0.573374	0.819958	1.17687	0.641105	1.15737	0.873736	0.282651	32.3497	5		0.626408	0.0752357	b3598
	b3003	yghA	predicted glutathionylspermidine synthase, with NAD(P)-binding Rossmann-fold domain	3.93028	1.752	0.505788	1.93027	0.864979	1.26326	0.687062	54.388	5		9.27093	0.896877	0.81384	0.857994	0.599287	0.791999	0.132878	16.7775	5		0.626949	0.716618	b3003
	b0032	carA	carbamoyl phosphate synthetase small subunit, glutamine amidotransferase	1.57463		1.32354	3.14314	1.32972	1.84275	0.874771	47.4709	4		19.5356		1.53167	0.780334		1.156	0.531273	45.9579	3		0.627322	0.468666	b0032
	b2056	wcaD	predicted colanic acid polymerase		1.0916	1.6268	2.30952	1.03864	1.51664	0.59159	39.0067	4		0.716442	0.922706			1.21993	0.953028	0.253112	26.5588	3		0.628381	0.158344	b2056
	b0373	insE	IS3 element protein InsE	0.623121	1.76855	0.563391	0.978546	1.00543	0.987809	0.480387	48.6316	5		0.615585	0.70449	0.514022	0.702153	0.56927	0.621104	0.0832255	13.3996	5		0.62877	0.163833	b0373
	b0481	ybaK	conserved protein	1.36309	1.52636		0.511494	1.14945	1.1376	0.445021	39.1193	4		0.801367	0.569655	0.798465	0.632485	0.779298	0.716254	0.107803	15.0509	5		0.629619	0.153339	b0481
	b4027	yjbF	predicted lipoprotein	0.569456		0.570333	0.815137	1.36277	0.829425	0.373888	45.078	4		0.551514	0.556195	0.348994	0.470596	0.687205	0.522901	0.124401	23.7905	5		0.630438	0.20036	b4027
	b0465_			0.303104	0.490925	0.790175	1.50357	1.02091	0.821737	0.4701	57.2081	5		0.589619	0.342684	0.601244	0.449803	0.612083	0.519086	0.118629	22.8533	5		0.631694	0.227613	b0465_
	b1394	paaG	acyl-CoA hydratase	79.3932	2.03035	1.06218	3.19465	0.978279	1.81636	1.03548	57.0082	5		1.46468	0.914957	0.953874	1.25993		1.14836	0.261282	22.7526	4		0.632229	0.355963	b1394
	b2556	yfhK	predicted sensory kinase in two-component system	0.735113	0.79953	1.32426	2.14257	1.11661	1.22362	0.566688	46.3126	5		0.604829	0.808228	0.619488	0.865784	0.976552	0.774976	0.160555	20.7174	5		0.633349	0.153811	b2556
	b2618	yfjF	predicted protein	1.0461	1.49476	1.10531	0.565336	0.929169	1.02814	0.334662	32.5504	5		0.593423	0.598537	0.624589	0.538617	0.904749	0.651983	0.144723	22.1973	5		0.634141	0.0649196	b2618
	b0126	can	carbonic anhydrase	0.564641	1.23161	0.970692	0.47579	0.882465	0.825041	0.308057	37.3384	5		0.388518	0.569467	0.757887	0.382878		0.524687	0.177988	33.9227	4		0.635954	0.112847	b0126
	b4248	yjgH	predicted mRNA endoribonuclease			0.633963	1.51312	1.02072	1.05593	0.440632	41.7292	3		0.740234	0.603863	0.489798	0.752663	0.77458	0.672228	0.121989	18.147	5		0.636619	0.268062	b4248
	b1447	ydcZ	predicted inner membrane protein	0.801835	2.14866	0.789205		1.2406	1.24508	0.637905	51.2343	4		0.681739	0.621387	0.965664	0.760285	0.934453	0.792705	0.152251	19.2065	5		0.636672	0.252331	b1447
	b0306	ykgE	predicted oxidoreductase		1.28089	0.661186	9.59766	2.48409	1.47539	0.926887	62.8233	4			1.10696	0.693504	1.04668	0.915634	0.940694	0.183128	19.4673	4		0.637591	0.302582	b0306
	b0771	ybhJ	predicted hydratase	0.986308		1.36364	1.4475	1.18944	1.24672	0.204187	16.3779	4		0.502686	1.08832	0.60182	1.04382	0.738014	0.794932	0.261706	32.9218	5		0.637618	0.0226955	b0771
	b4241	treR	DNA-binding transcriptional repressor	1.4099		1.2964	2.60445	0.965011	1.56894	0.715679	45.6154	4		1.28381	1.20484	1.04452		0.472564	1.00143	0.366364	36.584	4		0.638286	0.223688	b4241
	b0315	yahA	predicted DNA-binding transcriptional regulator	2.42595	6.1799	1.42631	2.74526	1.06511	1.91566	0.798231	41.6688	5		0.814934	1.51662	1.35847	1.17655	1.2492	1.22316	0.261691	21.3948	5		0.638504	0.164081	b0315
	b2981			1.15485	0.613747	0.524729	1.45127	0.876421	0.924204	0.383812	41.5289	5			0.601663		0.620249	0.548444	0.590119	0.0372686	6.31544	3		0.638516	0.123484	b2981
	b1161	ycgX	predicted protein	1.72985	0.905425	1.7079	1.57299	1.06154	1.39554	0.3849	27.5807	5		0.799249	0.923778	1.00662	0.826602	0.902338	0.891718	0.0823622	9.23636	5		0.638977	0.0413506	b1161
	b0694	kdpE	DNA-binding response regulator in two-component regulatory system with KdpD	0.757606		1.35401	1.26034	1.01866	1.09765	0.267119	24.3354	4		0.376879	0.673374	0.896891	0.785412	0.774607	0.701433	0.197948	28.2205	5		0.639029	0.0524898	b0694
	b3291	mscL	mechanosensitive channel	1.23265	0.963013	1.67891	1.56269	1.14437	1.31633	0.297307	22.5861	5		0.775633	0.774726		0.726991	1.08805	0.841349	0.166026	19.7334	4		0.639163	0.0212155	b3291
	b0108	ppdD	predicted major pilin subunit	0.662475	0.465105	0.305819	1.52125	1.55145	0.901221	0.593494	65.8544	5		0.557112	0.693988	0.446729		0.606669	0.576124	0.103166	17.9068	4		0.639271	0.291232	b0108
	b3919	tpiA	triosephosphate isomerase	1.03791	0.797559	0.759175	0.896779	1.0577	0.909823	0.135776	14.9234	5		0.558743	0.593593	0.577155	0.589909	0.590513	0.581983	0.0144378	2.48079	5		0.639666	0.00545306	b3919
	b2077	mdtD	multidrug efflux system protein	1.17581	0.720935		1.1388	1.4723	1.12696	0.309107	27.4283	4		0.71216	0.982736	0.469227			0.721374	0.256878	35.6095	3		0.640105	0.118357	b2077
	b2224	atoB	acetyl-CoA acetyltransferase	1.66216	0.729446	0.721338	1.553	1.16618	1.16643	0.442789	37.9612	5		0.78536	0.813664		0.642813		0.747279	0.0915705	12.2539	3		0.640657	0.1019	b2224
	b4221	ytfN	conserved protein	1.42667	1.1876	2.21031	1.10072	1.95265	1.57559	0.485606	30.8206	5		0.213315	0.919954		0.936936	1.97266	1.01072	0.72454	71.6857	4		0.641485	0.238131	b4221
	b4002	zraP	Zn-binding periplasmic protein	1.72621	0.866275	1.03962	1.53219		1.29107	0.404627	31.3403	4		0.623567	0.670474	1.10077	1.05922	0.709613	0.832729	0.228242	27.4089	5		0.644989	0.105284	b4002
	b1561	rem	Qin prophage; predicted protein	1.74588	0.976528	1.48779	2.04979	1.04337	1.46067	0.457626	31.3298	5		1.17649	0.735976	1.03558		0.824755	0.9432	0.19994	21.1981	4		0.64573	0.0657663	b1561
	b2289	lrhA	DNA-binding transcriptional repressor of flagellar, motility and chemotaxis genes	0.39762	1.25735	0.555251	0.300835	0.696909	0.641593	0.375935	58.594	5		0.466886		0.354407	0.370695	0.465216	0.414301	0.0601283	14.5132	4		0.645738	0.2501	b2289
	b1463	nhoA	N-hydroxyarylamine O-acetyltransferase	2.28931		1.24244	1.36546		1.63241	0.572215	35.0535	3		0.924518	1.35238	1.13239	1.03087	0.840439	1.05612	0.198786	18.8223	5		0.646972	0.217922	b1463
	b0189	rof	modulator of Rho-dependent transcription termination	0.601383		0.921523	0.673489	1.16284	0.839807	0.255299	30.3997	4		0.509227	0.409476	0.556763	0.542601	0.701724	0.543958	0.105294	19.357	5		0.647718	0.0985687	b0189
	b2106	rcnA	membrane protein conferring nickel and cobalt resistance		2.50668	1.79222		1.45786	1.91892	0.53577	27.9204	3			1.3206	1.31652	1.09346		1.24353	0.129977	10.4523	3		0.648036	0.154358	b2106
	b1545	pinQ	Qin prophage; predicted site-specific recombinase	1.20082			0.948063	1.1117	1.08686	0.128196	11.795	3		0.570583	0.792941	0.79068	0.394417	0.973389	0.704402	0.224519	31.8737	5		0.648107	0.0220969	b1545
	b1654	grxD	conserved protein	2.33013		1.66462	1.07701	2.0568	1.78214	0.543677	30.507	4		3.11338	0.780521	1.07629	1.76717	1.00081	1.1562	0.426202	36.8624	5		0.64877	0.657139	b1654
	b2120	yehM	predicted protein	1.7088	1.07168	1.37173	1.53044	0.923583	1.32125	0.322852	24.4354	5		0.973449	3.18143	0.967861	0.894998	0.592837	0.857286	0.179885	20.9831	5		0.648846	0.998665	b2120
	b1821	yebN	conserved inner membrane protein	0.62933	0.637039	0.638954	1.09348	1.099	0.819559	0.252604	30.8219	5		0.737439	0.573356	0.510501	0.351468	0.486621	0.531877	0.14056	26.4272	5		0.64898	0.0658625	b1821
	b2702	srlA	glucitol/sorbitol-specific enzyme IIC component of PTS	1.91771	0.888081	1.21732	1.60612	1.00486	1.32682	0.428749	32.3141	5		1.09212	1.33542	0.689669	0.605621	0.587442	0.862056	0.334625	38.8171	5		0.649716	0.0945751	b2702
	b2873	hyuA	D-stereospecific phenylhydantoinase	1.93171	0.545177	0.609736	1.66974	0.971257	1.14552	0.626646	54.7039	5		0.586521	1.41314	0.692613	0.566078	0.467399	0.74515	0.381884	51.2493	5		0.650488	0.264202	b2873
	b0073	leuB	3-isopropylmalate dehydrogenase	1.01082	2.16595	0.236031	2.41374	1.11056	1.38742	0.894933	64.5034	5		1.1942	0.815189		1.06402	0.537017	0.902607	0.290046	32.1342	4		0.650566	0.306317	b0073
	b2032	wbbK	lipopolysaccharide biosynthesis protein	2.32615	0.807256	1.23948	1.98018	1.05813	1.48224	0.643145	43.3901	5		1.02839	0.934074	1.06815	0.644693	1.14666	0.964393	0.194428	20.1606	5		0.650632	0.148824	b2032
	b2294	yfbU	conserved protein	1.30165	1.7627	1.50344		1.69143	1.5648	0.206733	13.2114	4		0.69832	0.821369	1.0097		1.54799	1.01934	0.374969	36.7854	4		0.651418	0.0547752	b2294
	b2122			3.14712	1.21473	0.710754	2.04509	1.1276	1.64906	0.967212	58.6524	5		0.884634		1.44251		0.899069	1.0754	0.318003	29.5706	3		0.652132	0.274313	b2122
	b3393	hofO	conserved membrane protein	2.44462	0.812853	0.407816	1.8537	1.25143	1.35409	0.812063	59.9713	5		8.30236	1.0755	0.695238			0.885369	0.268885	30.3698	3		0.65385	0.504115	b3393
	b0702	ybfB	predicted inner membrane protein	38.3305	2.09328	1.31235	1.07338	1.05341	1.38311	0.487848	35.2718	5		0.752381	0.862903	1.02859	0.816467	1.06184	0.904436	0.134884	14.9136	5		0.653916	0.34713	b0702
	b2203	napB	nitrate reductase, small, cytochrome C550 subunit, periplasmic		7.45968	0.731381	3.75746	1.0972	1.86201	1.65166	88.7031	4		1.16397		1.25666	1.25885	1.19474	1.21855	0.0469804	3.85542	4		0.654429	0.279969	b2203
	b0930	asnS	asparaginyl tRNA synthetase	0.490012	1.13128	0.610793	0.460096	0.794111	0.697259	0.275877	39.5659	5		0.464635	0.455426	0.367619	0.465591	0.531918	0.457038	0.058601	12.8219	5		0.655478	0.123645	b0930
	b3017	sufI	repressor protein for FtsI			1.02996	1.43107	0.777798	1.07961	0.329455	30.5162	3			0.920282	0.79017	0.559254	0.561828	0.707884	0.178239	25.1791	4		0.655685	0.178674	b3017
	b1535	ydeH	conserved protein	1.94271		1.06091	2.49469	1.24727	1.6864	0.659065	39.0813	4			1.13296	0.778873	1.16462	1.34846	1.10623	0.238023	21.5166	4		0.655973	0.177427	b1535
	b3828	metR	DNA-binding transcriptional activator, homocysteine-binding	3.51615	0.908524		0.990341	1.42859	1.10915	0.279651	25.213	4		3.21419	0.716541	0.9282	0.614714	0.65238	0.727959	0.139957	19.2259	5		0.65632	0.560757	b3828
	b1094	acpP	acyl carrier protein (ACP)	0.306155	0.917128	0.693729	0.280029	0.497136	0.538835	0.269238	49.9667	5		0.275752	0.244968		0.357689	0.536944	0.353838	0.131012	37.026	4		0.656672	0.225709	b1094
	b1917	yecC	predicted transporter subunit: ATP-binding component of ABC superfamily	2.42112		0.952252	1.42966	1.22911	1.50804	0.639418	42.4007	4		1.11801	1.09783	1.09975	0.64705	0.988864	0.9903	0.19854	20.0485	5		0.656682	0.204435	b1917
	b2135	yohC	predicted inner membrane protein	0.58637			1.22672	0.913645	0.908912	0.320202	35.2292	3		0.536406	0.737105	0.630261	0.551243	0.529512	0.596905	0.0881131	14.7617	5		0.656725	0.230101	b2135
	b3923	uspD	stress-induced protein		1.00778	1.86775		0.811741	1.22909	0.561715	45.7016	3		0.93991	4.13352	1.48296			0.807625	0.383997	47.5464	3		0.65709	0.439214	b3923
	b4068	yjcH	conserved inner membrane protein involved in acetate transport	0.966177	1.43066	0.805046	1.01049	1.43435	1.12934	0.287114	25.4231	5		0.807374	0.806754	0.824278	0.597782	0.676297	0.742497	0.100438	13.5271	5		0.657459	0.0363782	b4068
	b3762			0.785109	0.605504	0.729338		1.00811	0.782016	0.168386	21.5322	4		0.656259	0.46878	0.554538	0.320086	0.571405	0.514214	0.127302	24.7567	5		0.657549	0.042102	b3762
	b0970	yccA	inner membrane protein	0.635914	1.91478	1.00749	0.459893	0.76438	0.956493	0.571667	59.767	5			0.528252	0.661999		0.696684	0.628978	0.088939	14.1402	3		0.657588	0.272826	b0970
	b2271	yfbL	predicted peptidase			1.67194	2.25244	1.31749	1.74729	0.472009	27.0138	3		0.642586	1.28349	1.37346	1.30051		1.15001	0.340527	29.6107	4		0.658168	0.146518	b2271
	b4265	idnT	L-idonate and D-gluconate transporter	14.0021	1.21867	1.46121	1.95344	1.03448	1.41695	0.398073	28.0937	5		0.75275	0.496222	1.07265	1.6052	0.742891	0.933944	0.427423	45.7653	5		0.659123	0.300473	b4265
	b3678	yidJ	predicted sulfatase/phosphatase			0.929878	2.21777	1.17593	1.44119	0.683694	47.4395	3		0.906819	1.05076	1.04173	0.844706	0.906826	0.950169	0.0913549	9.6146	5		0.659294	0.339278	b3678
	b0267	yagA	CP4-6 prophage; predicted DNA-binding transcriptional regulator	1.39705			1.17799	0.959683	1.17824	0.218681	18.56	3		0.632001	0.980416	0.852473	0.715055	0.704389	0.776867	0.138932	17.8836	5		0.659346	0.065032	b0267
	b3715	yieH	predicted hydrolase		1.4203	1.21729	1.28908	1.26842	1.29877	0.0864522	6.65645	4		2.43038	0.844873		0.905413	0.818806	0.856364	0.0444321	5.18847	4		0.659364	0.909419	b3715
	b3676	yidH	conserved inner membrane protein	1.11581			0.530951	0.943619	0.86346	0.300557	34.8084	3			0.566217	0.361106	0.738503	0.612492	0.56958	0.156896	27.5459	4		0.659648	0.226029	b3676
	b2360	yfdQ	CPS-53 (KpLE1) prophage; predicted protein	4.89405	1.7552	0.898058	3.56504	0.911227	1.78238	1.25427	70.3703	5			1.13957		1.22776	1.1644	1.17724	0.0454748	3.86282	3		0.660489	0.195013	b2360
	b0308	ykgG	predicted transporter			2.27008	1.12405	1.4048	1.59965	0.597346	37.3424	3		1.35498		0.762258	33.338		1.05862	0.419115	39.5908	3		0.661782	0.442565	b0308
	b0788	ybhN	conserved inner membrane protein		1.66283		2.81038	1.21014	1.89445	0.824882	43.542	3			1.59367	1.26006	1.20299	0.961231	1.25449	0.260596	20.7731	4		0.662191	0.309606	b0788
	b1980			2.84237	1.54872	1.38333	1.19133	1.02785	1.59872	0.722397	45.186	5		0.483941	0.881073	1.26572	0.917827	1.7567	1.06105	0.477435	44.9963	5		0.663689	0.207969	b1980
	b4156	yjeM	predicted transporter	1.61546	1.93696	1.36232	3.61819	1.1075	1.92809	0.993443	51.5248	5		1.10602		1.15894	1.57514		1.28003	0.256936	20.0726	3		0.663888	0.227115	b4156
	b4188	yjfN	predicted protein	0.508516			6.6873	1.06467	0.786596	0.393263	49.9956	3		0.759864	0.377891	0.430275			0.522677	0.207073	39.6179	3		0.66448	0.375596	b4188
	b3212	gltB	glutamate synthase, large subunit	1.55383	0.833044			1.58773	1.32487	0.426269	32.1745	3		0.7218	8.1155	1.03922			0.880511	0.224452	25.4911	3		0.664603	0.501048	b3212
	b4273	insD	KpLE2 phage-like element; IS2 insertion element transposase InsAB'		1.59608	1.14532	0.969983	1.20685	1.22956	0.264151	21.4834	4		0.298337		1.09356	0.868027	1.01747	0.819348	0.359752	43.9071	4		0.666376	0.120058	b4273
	b4210	ytfF	predicted inner membrane protein	1.16845	1.26074	0.685538	1.03025	0.931496	1.01529	0.223431	22.0065	5		0.724777	0.596286	0.670898		0.717585	0.677387	0.0591075	8.72581	4		0.667182	0.0251469	b4210
	b3770	ilvE	branched-chain amino-acid aminotransferase	2.10548		1.16152	1.84273	1.80971	1.72986	0.401337	23.2006	4			1.32958	0.900232	1.09023	1.29708	1.15428	0.199803	17.3098	4		0.667268	0.0566349	b3770
	b1883	cheB	fused chemotaxis regulator: protein-glutamate methylesterase in two-component regulatory system with CheA	1.78977	0.956224	0.690902	1.53053	0.996403	1.19277	0.451906	37.8872	5		0.639424	1.24095	0.556962	0.746808	0.797162	0.796262	0.265546	33.3491	5		0.667576	0.138095	b1883
	b1744	astE	succinylglutamate desuccinylase	2.14396	0.843147	1.02143	1.91228	1.05292	1.39475	0.589415	42.2596	5		0.943429	1.10357		0.795723	0.887456	0.932544	0.129255	13.8605	4		0.668612	0.156149	b1744
	b1793	yoaF	conserved outer membrane protein	2.47911	1.00117	1.58131	1.28844	0.901654	1.45034	0.633351	43.6693	5		0.848467	0.987036	1.25703	0.941404	0.817641	0.970316	0.17427	17.9601	5		0.669029	0.168211	b1793
	b3627	rfaI	UDP-D-galactose:(glucosyl)lipopolysaccharide-alpha-1,3-D-galactosyltransferase		2.43545	0.811126	1.89484	1.08784	1.55731	0.744368	47.7982	4			1.29639	1.07878	0.944895	0.851423	1.04287	0.193056	18.512	4		0.66966	0.263327	b3627
	b0116	lpd	lipoamide dehydrogenase, E3 component is part of three enzyme complexes	0.757468	1.0147	0.765698	0.565127	1.15021	0.85064	0.231339	27.1959	5		0.597058	0.441053	0.51668	0.561922	0.734336	0.57021	0.108713	19.0654	5		0.67033	0.0518121	b0116
	b1138	ymfE	e14 prophage; predicted inner membrane protein	4.31167	8.63359	1.56909	1.46004	1.06139	2.10055	1.49015	70.9407	5		1.59855	1.45741		1.06758	1.51728	1.41021	0.235626	16.7086	4		0.671351	0.235056	b1138
	b2162	rihB	ribonucleoside hydrolase 2	1.6329	0.960509	1.26435	1.72438	0.923813	1.30119	0.370458	28.4707	5		0.916628	0.810304		0.839828	0.933082	0.87496	0.0592427	6.7709	4		0.672431	0.0608346	b2162
	b1534	ydeE	predicted transporter	0.692832	0.987027	0.558434	0.923726	1.02846	0.838096	0.20314	24.2383	5		0.315117	0.388823	0.721689	0.354004	1.03918	0.563762	0.311201	55.2009	5		0.67267	0.143516	b1534
	b2003	yeeT	CP4-44 prophage; predicted protein	1.23019	0.66145	1.28244	0.702291	1.22146	1.01957	0.30949	30.3551	5		0.146266	0.870625	0.602025		1.12785	0.686691	0.419396	61.0749	4		0.673514	0.238403	b2003
	b3561	wecH	conserved inner membrane protein	0.632454		1.23306	0.717671	1.11427	0.924364	0.293991	31.8047	4		0.392923	0.614676		0.474537	1.01004	0.623044	0.273767	43.9403	4		0.674025	0.184489	b3561
	b3593	rhsA	rhsA element core protein RshA	0.220347	0.34399	0.715814	0.480878	0.849445	0.522095	0.259402	49.6848	5		0.195061	0.473861	0.386959			0.35196	0.142657	40.5322	3		0.674131	0.276874	b3593
	b2372	yfdV	predicted transporter	1.93515	1.19386	0.718409	1.72113	1.56675	1.42706	0.479768	33.6194	5		1.14673	0.967239	0.558324	1.02798	1.11263	0.96258	0.236721	24.5923	5		0.67452	0.101586	b2372
	b1789	yeaL	conserved inner membrane protein	1.6235	2.59469	1.7162	1.41435	1.1013	1.69001	0.55815	33.0264	5		0.641116	1.54548		0.953916	1.42043	1.14023	0.418953	36.7427	4		0.674692	0.135479	b1789
	b4084	alsK	D-allose kinase	1.76104	1.01006	1.6506	1.4405	1.13618	1.39967	0.32266	23.0525	5		0.555698	0.808785	1.33539	0.946884	1.08382	0.946115	0.29231	30.8958	5		0.675953	0.0485036	b4084
	b4050	pspG	phage shock protein G	1.5081	1.30183	1.16968	1.08642	0.906342	1.19448	0.226494	18.9618	5		0.809688	0.737993	0.890021	0.972794	0.6266	0.807419	0.133877	16.5809	5		0.675961	0.0148326	b4050
	b0705			0.487395	0.949354	0.834093	1.074	0.954006	0.859769	0.22479	26.1453	5		0.371439		0.515134		0.857185	0.581253	0.249532	42.93	3		0.676057	0.188889	b0705
	b2139			162.483			1.84613	1.21013	1.52813	0.449719	29.4294	3			1.02545	0.966509		1.10744	1.03313	0.0707776	6.85078	3		0.676077	0.419117	b2139
	b4120	melB	melibiose:sodium symporter	2.11161	0.629036	0.489591	1.98929	1.02381	1.24867	0.758927	60.779	5				0.898377	0.695962	0.940795	0.845045	0.13084	15.4832	3		0.676757	0.304992	b4120
	b0076	leuO	DNA-binding transcriptional activator			0.993326	1.29848	0.909595	1.06713	0.204679	19.1802	3		0.695486	0.782357	0.949095	0.592511	0.592587	0.722407	0.149526	20.6983	5		0.67696	0.0768227	b0076
	b0426	yajQ	predicted nucleotide binding protein	0.760487	1.03253	0.799109	0.668966	1.17765	0.887747	0.210309	23.6902	5		0.661706	0.651331	0.524401	0.529972	0.639812	0.601444	0.068257	11.3488	5		0.677495	0.0353581	b0426
	b2103	thiD	bifunctional hydroxy-methylpyrimidine kinase/ hydroxy-phosphomethylpyrimidine kinase		1.88303		0.981614	1.17432	1.34632	0.474685	35.2579	3		0.930566	0.985237	0.957912	0.911166	0.780083	0.912993	0.0793947	8.69609	5		0.678138	0.253436	b2103
	b0698	kdpA	potassium translocating ATPase, subunit A	1.45024	0.882767	0.3057	1.12378	1.44198	1.04089	0.474555	45.5913	5		0.590001	0.872876		0.688759	0.676171	0.706952	0.119005	16.8335	4		0.679179	0.194942	b0698
	b2005	yeeV	CP4-44 prophage; toxin of the YeeV-YeeU toxin-antitoxin system	0.518576	0.780642	1.58595	0.328684	1.61806	0.966381	0.602128	62.3075	5		0.327402	0.454434	0.862125	0.633085	1.00756	0.65692	0.280716	42.7321	5		0.679774	0.340034	b2005
	b0898	ycaD	predicted transporter		107.962	0.955044		0.733964	0.844504	0.156327	18.5111	3			2.54394		0.671229	0.477404	0.574317	0.137055	23.864	3		0.680064	0.426843	b0898
	b0648	ybeU	predicted tRNA ligase	1.83909	3.08524	2.21738	1.60204	1.17344	1.98344	0.723029	36.4533	5		1.04081	1.54337	1.36948	1.14862	1.64373	1.3492	0.255051	18.9038	5		0.680235	0.12382	b0648
	b4155	poxA	predicted lysyl-tRNA synthetase	0.495444	0.636833		0.307576	0.819502	0.564839	0.216823	38.3866	4		0.442395	0.282859	0.318145	0.306785	0.571439	0.384325	0.121523	31.6199	5		0.680415	0.203292	b4155
	b4192	ulaG	predicted L-ascorbate 6-phosphate lactonase	1.41896	1.00709	0.977668	1.3546	1.3439	1.22044	0.210422	17.2414	5		0.930041	0.911936	0.883586		0.600052	0.831404	0.155415	18.693	4		0.681231	0.0153685	b4192
	b2226	yfaQ	predicted protein	1.71512	0.47104	0.561224	1.64661	1.0551	1.08982	0.584065	53.5928	5				0.970865	0.778859	0.482102	0.743942	0.246245	33.1	3		0.682629	0.291039	b2226
	b3929	rraA	ribonuclease E (RNase E) inhibitor protein	0.557711		0.651855	1.41628	0.801899	0.856936	0.386216	45.0694	4		0.649685	0.491415	0.6867		0.513589	0.585347	0.0972699	16.6175	4		0.68307	0.256383	b3929
	b3856	mobB	molybdopterin-guanine dinucleotide biosynthesis protein B	0.315084	0.852244	0.551798	0.600224	0.71646	0.607162	0.200271	32.9848	5		0.509633	0.471513	0.325312	0.281013	0.486959	0.414886	0.104072	25.0844	5		0.68332	0.105335	b3856
	b3938	metJ	DNA-binding transcriptional repressor, S-adenosylmethionine-binding	0.911902	0.759012	1.24332	1.12885	0.856384	0.979894	0.200155	20.4262	5		0.753178			0.737413	0.520035	0.670209	0.130293	19.4406	3		0.68396	0.0391623	b3938
	b4234	yjgA	conserved protein	1.09583	1.55273	0.777802	1.23693	1.11761	1.15618	0.279316	24.1586	5			0.523874	0.895439	0.954655		0.791323	0.233502	29.5078	3		0.68443	0.103342	b4234
	b0271	yagH	CP4-6 prophage; predicted xylosidase/arabinosidase	3.12317	1.03005	2.61263	1.27312	2.56404	2.1206	0.915341	43.1642	5		0.870676	1.97463	2.26484	0.997133	1.15222	1.4519	0.626211	43.1305	5		0.684664	0.219167	b0271
	b3697	yidA	predicted hydrolase	0.679236	0.513187	0.901972	1.28499	0.826375	0.841153	0.289262	34.3887	5		0.475449	0.493854	0.758525	0.482282	0.671966	0.576415	0.130543	22.6473	5		0.685268	0.11522	b3697
	b1599	mdtI	multidrug efflux system transporter	1.80952		0.886038	1.81302	1.18668	1.42381	0.463928	32.5835	4		1.01059	1.16311	0.773244	0.94244	0.994028	0.976683	0.140327	14.3677	5		0.685962	0.147804	b1599
	b1160	elbA	predicted protein	3.56873		2.09946	1.37029	0.99735	2.00896	1.13612	56.5529	4		1.22058	1.42122	1.42656	1.45175		1.38003	0.107129	7.76286	4		0.686937	0.34957	b1160
	b2553	glnB	regulatory protein P-II for glutamine synthetase	1.33814	0.785707	0.93368	0.944073	0.966124	0.993544	0.20538	20.6714	5		0.757634	0.957899	0.562042	0.528389	0.610397	0.683272	0.176739	25.8665	5		0.687712	0.03422	b2553
	b1358	ydaT	Rac prophage; predicted protein		6.71432	1.27193	1.75731	1.16309	1.39744	0.316368	22.639	4		1.07941	0.967634		0.839235		0.962092	0.120181	12.4917	3		0.688465	0.278215	b1358
	b1339	abgR	predicted DNA-binding transcriptional regulator	1.28848	1.03175	1.49969	1.26467	1.12449	1.24182	0.178253	14.3542	5		0.550625	0.591717			1.42251	0.85495	0.491948	57.5412	3		0.688468	0.304414	b1339
	b2839	lysR	DNA-binding transcriptional dual regulator			0.960736	2.59858	1.61969	1.72634	0.824116	47.7378	3			0.964749	1.27225	1.07173	1.46617	1.19372	0.221889	18.5879	4		0.691478	0.379762	b2839
	b3046_					1.35971	1.23217	1.1442	1.24536	0.108357	8.70084	3		0.596795	0.792167	0.917115	0.717283	1.28657	0.861987	0.264317	30.6637	5		0.692159	0.0304572	b3046_
	b1207	prs	phosphoribosylpyrophosphate synthase	0.46289	0.57411	0.789785	0.35073	0.576836	0.55087	0.162858	29.5638	5		0.384567	0.277877	0.372628	0.404487	0.468186	0.381549	0.0686816	18.0007	5		0.69263	0.0812117	b1207
	b1653	lhr	predicted ATP-dependent helicase		2.08922	1.60835		0.958577	1.55205	0.567421	36.5594	3		0.958916	1.14747		1.12657		1.07765	0.10336	9.59118	3		0.694342	0.283012	b1653
	b1054	lpxL	lauryl-acyl carrier protein (ACP)-dependent acyltransferase	2.04478		0.992786	1.56116	0.692041	1.32269	0.601345	45.4636	4		0.903717	0.902202	1.12123	0.821978	0.844392	0.918704	0.118736	12.9243	5		0.69457	0.272692	b1054
	b3672	ivbL	ilvB operon leader peptide	0.200139	1.0818		1.05936	0.85642	0.79943	0.412186	51.5601	4		0.564035	0.560224	0.542013			0.555424	0.0117697	2.11905	3		0.694775	0.321746	b3672
	b0144	yadB	glutamyl-Q tRNA(Asp) synthetase	0.927651	0.873875			0.932333	0.911286	0.0324836	3.56458	3			0.532116	0.67028	0.699619		0.634005	0.0894495	14.1086	3		0.695725	0.0225724	b0144
	b0604	dsbG	periplasmic disulfide isomerase/thiol-disulphide oxidase	1.37453		1.14598	1.21412	0.784656	1.12982	0.249258	22.0617	4		6.96901	32.6026	0.718994	1.08974	0.549836	0.786188	0.276151	35.1253	5		0.695852	0.304964	b0604
	b4269	yjgB	predicted alcohol dehydrogenase, Zn-dependent and NAD(P)-binding	1.00504	0.396308	0.778125	1.20787	0.975158	0.8725	0.306694	35.1511	5		0.42908	0.657037	0.684201	0.784316	0.486019	0.608131	0.146791	24.138	5		0.696998	0.134993	b4269
	b2739	ygbM	conserved protein	0.518137			0.794827	1.41283	0.908597	0.458067	50.4147	3		0.80588	0.509392	0.404526	0.638955	0.81163	0.634077	0.179795	28.3554	5		0.697864	0.410759	b2739
	b2180	yejF	fused predicted oligopeptide transporter subunits of ABC superfamilly: ATP-binding components	1.81065		1.33189	2.68057	1.20155	1.75616	0.669604	38.1288	4		0.817241	1.28774	1.42957	1.36845		1.22575	0.278464	22.7179	4		0.69797	0.217216	b2180
	b1519	tam	trans-aconitate methyltransferase	1.3994		0.884596	0.74462	1.07215	1.02519	0.283269	27.6308	4		0.69367	2.47274	0.646301	1.04734	0.476009	0.71583	0.239957	33.5216	5		0.69824	0.918289	b1519
	b1050	yceK	predicted lipoprotein	1.44311			0.873241	1.39385	1.23673	0.315757	25.5315	3		1.0461	0.606263	0.744701	0.758389	1.16429	0.863948	0.23192	26.8442	5		0.698572	0.164406	b1050
	b3980	tufB	protein chain elongation factor EF-Tu (duplicate of tufA)	0.744696	0.849291	0.755366	0.745449	1.17583	0.854126	0.185105	21.6719	5		0.767329	0.45663	0.497559	0.669308	0.599694	0.598104	0.126327	21.1212	5		0.700253	0.0375738	b3980
	b1675	ydhZ	predicted protein	1.75758	0.709109	1.28532	1.39249	0.671914	1.16328	0.465925	40.0525	5		0.911797	0.5551	1.32445	0.507531	0.775727	0.81492	0.328836	40.3519	5		0.700534	0.213132	b1675
	b1693	aroD	3-dehydroquinate dehydratase	1.22192	2.60698	0.882611	1.45635	1.02416	1.4384	0.68798	47.8294	5		0.873057	1.13981		0.980706	1.03737	1.00774	0.111343	11.0488	4		0.700595	0.236341	b1693
	b4363	yjjB	conserved inner membrane protein	1.73369	1.04546	0.707461	1.44028	1.27408	1.24019	0.389373	31.3961	5		1.17206	0.763979	0.940596	0.698904	0.770262	0.86916	0.191495	22.0322	5		0.700826	0.105845	b4363
	b3457	livH	leucine/isoleucine/valine transporter subunit	1.63787	0.784107	0.688691	1.7834	1.28606	1.23602	0.491783	39.7875	5			1.12787	0.69074	0.824686	0.822571	0.866466	0.185186	21.3726	4		0.70101	0.178649	b3457
	b1727	yniC	predicted hydrolase	1.04081	3.03884	0.839237	0.927522	1.1205	0.982018	0.123815	12.6082	5		0.873152	0.655974	0.634679	0.497639	0.781998	0.688688	0.14424	20.9442	5		0.701299	0.164691	b1727
	b0967	yccW	predicted methyltransferase			1.2101	1.79017	1.08051	1.36026	0.377909	27.7821	3		1.11057	0.919349	0.902866	0.886486		0.954818	0.104699	10.9654	4		0.701939	0.199216	b0967
	b1476	fdnI	formate dehydrogenase-N, cytochrome B556 (gamma) subunit, nitrate-inducible	2.84583	0.88414	1.69644	1.55836	0.930645	1.58308	0.794071	50.1598	5		0.97025	1.02804	1.03392	1.08668	1.45254	1.11429	0.193535	17.3685	5		0.703872	0.262073	b1476
	b0804	ybiX	conserved protein	0.263953	1.01308	1.15414	0.323879	1.42162	0.835336	0.516002	61.7717	5		0.163766	0.583257	0.987587	0.501312	0.704642	0.588113	0.300328	51.0663	5		0.704043	0.387915	b0804
	b0292	matC	predicted protein	1.70972		0.818679	1.6773	0.99286	1.29964	0.460517	35.4342	4		1.03118	1.01203	0.636426	1.15604	0.740868	0.91531	0.217336	23.7446	5		0.70428	0.19777	b0292
	b4199	yjfY	predicted protein	1.24657	0.598034	1.20792	1.44771	0.698275	1.0397	0.370541	35.6392	5		0.841068	0.58749	0.758007	0.693124	0.784838	0.732905	0.0971526	13.2558	5		0.704919	0.13912	b4199
	b1188	ycgB	conserved protein	1.35144	0.47951	1.48912	1.24558	0.957129	1.10456	0.400358	36.2461	5		0.690348	0.510193	1.02404	0.825336	0.844733	0.778929	0.19146	24.5799	5		0.705197	0.154214	b1188
	b2269	elaD	predicted enzyme	8.95733			0.951497	1.70632	1.32891	0.533741	40.1639	3				0.809107	0.878829	1.12386	0.937264	0.165312	17.6377	3		0.705289	0.36914	b2269
	b2130	yehY	predicted transporter subunit: membrane component of ABC superfamily		1.78935	0.673991	5.02482	1.44442	1.30259	0.571048	43.8395	4		0.826092	1.15347	1.14774	0.85487	0.612454	0.918925	0.231307	25.1715	5		0.705461	0.264513	b2130
	b4200	rpsF	30S ribosomal subunit protein S6	0.482641	0.726226	0.267918	0.385076	0.852121	0.542796	0.241548	44.5006	5		0.418261	0.331304	0.408733		0.373672	0.382992	0.0394336	10.2962	4		0.705591	0.215004	b4200
	b0893	serS	seryl-tRNA synthetase, also charges selenocysteinyl-tRNA with serine	0.90081	0.952902	0.806052	0.564283	1.14518	0.873846	0.212736	24.3447	5				0.556458	0.63283	0.66137	0.616886	0.0542427	8.79298	3		0.705944	0.0522646	b0893
	b3236	mdh	malate dehydrogenase, NAD(P)-binding	0.419456	1.28509	0.540139	0.443706	1.07412	0.752504	0.399521	53.0922	5		0.701295	0.44295	0.432448	0.636089	0.445622	0.531681	0.127276	23.9384	5		0.706549	0.293983	b3236
	b2013	yeeE	predicted inner membrane protein	1.59433	1.42403		1.83133	1.07404	1.48093	0.318557	21.5106	4		1.07093	1.01959	1.07611	1.07767	0.992897	1.04744	0.0388523	3.70927	5		0.707283	0.07158	b2013
	b3820	yigI	conserved protein	0.869889	0.843757	0.506585	0.494079	0.812942	0.70545	0.18838	26.7036	5		0.515232	0.515927	0.456321	0.427835	0.582864	0.499636	0.0601395	12.0367	5		0.708251	0.0695232	b3820
	b2275	yfbP	predicted protein	1.04361	4.13594	0.949827		2.03517	1.34287	0.60138	44.7832	4		0.75098	1.02981	1.13071	0.654269	1.19112	0.951377	0.236759	24.886	5		0.708466	0.237602	b2275
	b2758	ygcJ	predicted protein	9.47115	1.26734	1.02978	3.21624	1.14511	1.66462	1.03895	62.4136	5			1.14843	1.48587	1.46868	0.615689	1.17967	0.406752	34.4802	4		0.708671	0.274488	b2758
	b1953	yodD	predicted protein		1.26657	1.30335	1.72757	1.6254	1.48072	0.230357	15.557	4			1.37061	1.40141	0.376623		1.04954	0.582971	55.5452	3		0.708806	0.328499	b1953
	b2680			1.724	1.081	0.816676	2.42505	0.926616	1.39467	0.674849	48.3878	5			0.978787	1.48262	0.669674	0.823781	0.988717	0.352626	35.6651	4		0.708926	0.288034	b2680
	b1707	ydiV	conserved protein	2.46711	5.41661	0.975704	2.14119	1.37258	1.73915	0.68527	39.4027	5			1.3092	1.41042	1.05857	1.15415	1.23309	0.156982	12.7308	4		0.709017	0.187886	b1707
	b4350	hsdR	endonuclease R	1.79225	1.61627		1.18337	1.11112	1.42575	0.33084	23.2046	4		0.448039	0.962407	1.30488	0.892945	1.45078	1.01181	0.391468	38.6899	5		0.709668	0.129705	b4350
	b1568	ydfX	Qin prophage; predicted protein			1.42388	1.45153	1.04161	1.30567	0.229106	17.5469	3		0.54297	0.753646	0.711978	1.10095	1.52547	0.927004	0.391214	42.202	5		0.709982	0.135218	b1568
	b3091	uxaA	altronate hydrolase			2.0175	3.22845	1.56842	2.27146	0.858662	37.8023	3		1.30974		1.77454	2.53559	0.834536	1.6136	0.724624	44.9073	4		0.710382	0.344981	b3091
	b3472	dcrB	periplasmic protein	0.803992	0.881126	0.897715	0.519578	1.04729	0.82994	0.194584	23.4456	5		0.490967	0.498139	0.462802	0.76022	0.736172	0.58966	0.145573	24.6876	5		0.710485	0.060621	b3472
	b0681	ybfM	predicted outer membrane porin	1.36586	0.674921	1.50212	1.63062	1.0238	1.23947	0.388326	31.3301	5		0.83719	0.613712	1.19136			0.880755	0.291279	33.0715	3		0.710592	0.193295	b0681
	b1850	eda	multifunctional 2-keto-3-deoxygluconate 6-phosphate aldolase and 2-keto-4-hydroxyglutarate aldolase and oxaloacetate decarboxylase	0.853494	1.0718	1.06015	0.679309	1.09393	0.951736	0.180455	18.9606	5		0.743822	0.842257	0.814745	0.577334	0.403745	0.676381	0.183949	27.196	5		0.710681	0.043907	b1850
	b0803	ybiI	conserved protein	1.36336	0.71767	1.22826	1.46681	1.0711	1.16944	0.292944	25.0499	5				1.1814	0.605359	0.709413	0.832057	0.30698	36.8941	3		0.711499	0.197849	b0803
	b1396	paaI	predicted thioesterase	3.2912	1.59927		1.94254	1.31388	2.03672	0.87492	42.9573	4		1.08135	1.6984	1.58964		1.42807	1.44936	0.26931	18.5813	4		0.711617	0.276503	b1396
	b2251	nudI	predicted NUDIX hydrolase	1.52025	0.589145	1.09732	1.39096	0.800413	1.07962	0.39049	36.1692	5		0.7973	0.52077	0.961436	0.694962	0.868952	0.768684	0.169501	22.0508	5		0.711995	0.158442	b2251
	b3636	rpmG	50S ribosomal subunit protein L33			1.40066	0.344255	0.967816	0.904242	0.531062	58.73	3			0.331189	0.597999		1.00367	0.644287	0.338624	52.5579	3		0.712516	0.520722	b3636
	b0754	aroG	3-deoxy-D-arabino-heptulosonate-7-phosphate synthase, phenylalanine repressible	2.70416	1.39334	0.84514	0.88113	1.20604	1.40596	0.760823	54.1141	5		1.22878	1.03815	0.812293		0.927895	1.00178	0.177217	17.6902	4		0.712524	0.307342	b0754
	b1045	ymdB	conserved protein	1.52894	5.06275	0.987869	1.22836	1.01374	1.5863	0.250516	15.7924	5		1.06674	1.15998	1.34656	0.948058		1.13033	0.168226	14.8828	4		0.71256	0.346768	b1045
	b1478	adhP	ethanol-active dehydrogenase/acetaldehyde-active reductase	2.08994	0.835876		3.40112	1.03384	1.84019	1.17724	63.974	4		1.14449	1.63675	1.86413	0.885671	1.02658	1.31152	0.418804	31.9327	5		0.712709	0.445139	b1478
	b2371	yfdE	predicted CoA-transferase, NAD(P)-binding	0.554232	3.34403	0.313695	0.985001	0.712327	0.641314	0.28171	43.927	5		0.273777		0.386652		0.711038	0.457155	0.226996	49.6541	3		0.712842	0.263842	b2371
	b1668	ydhS	conserved protein with FAD/NAD(P)-binding domain	2.01244		0.743559	0.992603	0.907579	1.16405	0.574965	49.3937	4		13.3397	0.658311	0.800584	0.99636	0.871335	0.831648	0.141086	16.9646	5		0.714446	0.436498	b1668
	b3002	yqhA	conserved inner membrane protein	0.4276		0.462371	0.459099	0.758518	0.526897	0.155208	29.457	4			0.248454	0.339053	0.47489	0.444635	0.376758	0.103474	27.4644	4		0.715051	0.165836	b3002
	b1409	ynbB	predicted CDP-diglyceride synthase	1.76534	2.71249	0.962334	2.03815	1.00942	1.69755	0.73566	43.3366	5		1.18953	1.23627	1.39906	1.06043	1.1844	1.21394	0.122271	10.0723	5		0.715112	0.217047	b1409
	b2707	srlR	DNA-bindng transcriptional repressor			1.53627	2.49916	1.32894	1.78813	0.624442	34.9216	3		0.827741	2.50496			0.503489	1.27873	1.07425	84.0092	3		0.715123	0.525747	b2707
	b1400	paaY	predicted hexapeptide repeat acetyltransferase	2.23376	1.33015	1.7887	1.66478	1.04706	1.61289	0.452545	28.058	5		0.956238		1.73668	0.769949		1.15429	0.512892	44.4336	3		0.715665	0.272133	b1400
	b3865	yihA	GTP-binding protein	1.39434	0.596075	0.823796	1.28087	1.05498	1.03001	0.326769	31.7248	5			0.700646	0.732921	0.734048	0.782883	0.737625	0.0339151	4.59788	4		0.716133	0.115944	b3865
	b0774	bioA	7,8-diaminopelargonic acid synthase, PLP-dependent	1.20765	1.94943	0.629391	1.71996	0.959403	1.29317	0.541328	41.8607	5		1.02114	0.827276	0.802668	1.05331		0.926098	0.129378	13.9703	4		0.716148	0.208283	b0774
	b0685	ybfE	lexA-regulated predicted protein	0.969985	0.764911	0.804455	1.69452	0.9931	1.04539	0.376332	35.9991	5			0.802971		0.774483	0.668771	0.748742	0.070706	9.44331	3		0.71623	0.154543	b0685
	b2473	ypfH	predicted hydrolase	1.49024	0.7586	0.809256	1.53685	1.11645	1.14228	0.365905	32.0329	5		0.9132	0.828086	0.785858	0.915904	0.650031	0.818616	0.109539	13.381	5		0.716651	0.120179	b2473
	b4377	yjjU	predicted esterase	0.470769	1.3451	0.433006	0.419769	0.68115	0.66996	0.391907	58.4971	5		0.556266	0.449371	0.413132	0.503503	0.478402	0.480135	0.0542697	11.303	5		0.716663	0.341685	b4377
	b3109			1.78605	0.428806	0.611387	1.48523	0.776806	1.01765	0.587123	57.6938	5		0.934594	0.765342	0.601614	0.834456	0.511348	0.729471	0.17198	23.576	5		0.716815	0.343505	b3109
	b2826	ppdA	conserved protein	1.74878	0.421913	1.1266	1.39144	1.80747	1.29924	0.563113	43.3418	5			0.932527	1.06376	1.18748	0.547816	0.932895	0.277022	29.6949	4		0.718032	0.249217	b2826
	b1450	yncC	predicted DNA-binding transcriptional regulator	0.436644	3.17599	1.50014	0.30488	1.10044	0.835526	0.563497	67.4421	5		0.221172	0.512986	0.662566	0.53826	1.06502	0.600001	0.306208	51.0346	5		0.718112	0.250178	b1450
	b2843	kduI	predicted 5-keto 4-deoxyuronate isomerase	1.94126	1.01598	1.2202	1.86994	1.15821	1.44112	0.431165	29.9188	5		0.705846	0.971123	1.17509	1.21816	1.10776	1.0356	0.206693	19.9589	5		0.718606	0.108844	b2843
	b4080	mdtP	predicted outer membrane factor of efflux pump	0.270196	0.689893	0.508422		0.913804	0.595579	0.273028	45.8424	4		0.331347	0.494356	0.438746	0.474341	0.401657	0.428089	0.0646176	15.0944	5		0.718779	0.3097	b4080
	b0858	ybjO	predicted inner membrane protein			1.23783	1.31849	0.896163	1.15083	0.224204	19.482	3		0.624266	0.795281	0.632754	1.10675	0.977906	0.827391	0.212643	25.7004	5		0.718952	0.111961	b0858
	b4329	yjiG	conserved inner membrane protein	16.7204		1.24297	1.48301	1.354	1.35999	0.120131	8.83324	4		1.25817	0.902843	1.03182		0.718389	0.977805	0.226889	23.2039	4		0.718978	0.351947	b4329
	b2160	yeiI	predicted kinase		2.64887	1.81817	1.84089	0.904766	1.80317	0.712738	39.5269	4		1.12674	1.38336		1.17606	1.50129	1.29686	0.175883	13.5622	4		0.719211	0.25235	b2160
	b1616			1.26155	0.474335	0.868588	0.733682	0.744355	0.816502	0.287196	35.1739	5			0.488723	0.601838	0.649203	0.61278	0.588136	0.0692994	11.7829	4		0.720312	0.152168	b1616
	b1423	ydcJ	conserved protein	0.431695	0.678936	1.1955	0.403636	2.19845	0.677441	0.366854	54.1529	5		0.199627	0.539953		0.375431	0.837103	0.488029	0.271049	55.5395	4		0.7204	0.228592	b1423
	b1577				2.39083	0.681671		1.04639	1.37297	0.900164	65.5635	3		0.798772	1.6799	0.962777	0.830555	0.675316	0.989463	0.399285	40.3537	5		0.720676	0.5449	b1577
	b3483	yhhH	predicted protein	2.37894		1.90344	1.2695	1.06396	1.65396	0.601042	36.3396	4		0.62294	1.07295	1.36489	1.00583	1.89483	1.19229	0.473423	39.7071	5		0.720869	0.258437	b3483
	b0841	ybjG	undecaprenyl pyrophosphate phosphatase	2.30076	0.615527	0.762925	0.781856	0.617362	0.694418	0.0903696	13.0137	5		0.794119	0.320034	0.548326	0.44268	0.39821	0.500674	0.183626	36.6758	5		0.720998	0.189283	b0841
	b4194	ulaB	L-ascorbate-specific enzyme IIB component of PTS	1.04222	1.28439	0.64765	1.4407	1.86249	1.25549	0.452366	36.031	5		0.69404	0.905043	1.03345	0.989525		0.905515	0.150717	16.6444	4		0.721244	0.165256	b4194
	b2385	ypdF	predicted peptidase			0.580437	2.03239	0.846128	1.15298	0.773086	67.0509	3		2.99262	0.635513	0.67633	1.19139	0.826585	0.832455	0.253003	30.3924	5		0.722001	0.865837	b2385
	b2232	ubiG	bifunctional 3-demethylubiquinone-9 3-methyltransferase/ 2-octaprenyl-6-hydroxy phenol methylase	1.08358	0.641882	1.08232	0.952829	0.975028	0.947128	0.180888	19.0986	5			0.647713	0.714386	0.769728	0.604274	0.684025	0.0729053	10.6583	4		0.72221	0.0279622	b2232
	b3827	yigM	predicted inner membrane protein	1.66155	0.42055	0.628959	1.39382	1.15246	1.05147	0.518695	49.3305	5		0.948342	0.980754	0.606582		0.507399	0.760769	0.239128	31.4325	4		0.723531	0.308928	b3827
	b2082	ogrK	DNA-binding transcriptional regulator prophage P2 remnant	1.7584		1.31423	1.86275	1.0897	1.50627	0.365632	24.274	4		1.02252	0.653788	1.3617	1.13966	1.27671	1.09088	0.276575	25.3535	5		0.724223	0.113201	b2082
	b3974	coaA	pantothenate kinase	0.901178	1.44621	1.39723	1.29428	1.52806	1.31339	0.245479	18.6904	5		0.514394	0.944776	0.86396	0.81773	1.61571	0.951314	0.405537	42.6291	5		0.724318	0.134108	b3974
	b1014	putA	fused DNA-binding transcriptional regulator/proline dehydrogenase/pyrroline-5-carboxylate dehydrogenase	1.49093	3.00529		0.724695	2.04305	1.81599	0.959613	52.8424	4		0.659121	1.2776	1.83488	1.1683	1.64093	1.31617	0.455411	34.6014	5		0.724764	0.390923	b1014
	b2158	yeiH	conserved inner membrane protein	0.64799	2.07028	0.622759	1.20812	0.86869	1.08357	0.59945	55.3219	5			0.687703	0.981112	0.722424	0.750953	0.785548	0.132916	16.9202	4		0.724965	0.335171	b2158
	b2391				2.08072		1.74213	1.01402	1.61229	0.545072	33.8074	3			1.29326	1.24726	1.22167	0.914695	1.16922	0.17225	14.732	4		0.725193	0.292219	b2391
	b0829	gsiA	fused predicted peptide transport subunits of ABC superfamily: ATP-binding components		2.04069	1.49506	2.58391		2.03989	0.544427	26.6891	3		0.799293	2.37233	1.37158	1.37607		1.47982	0.653752	44.1778	4		0.725442	0.273077	b0829
	b2165	yeiN	conserved protein	1.15251	1.59569	0.655571	1.52404	0.922295	1.17002	0.397761	33.9961	5		0.680987	0.797976	1.10769	0.833994	0.82495	0.84912	0.156969	18.4861	5		0.725731	0.151747	b2165
	b1195	ymgE	predicted inner membrane protein		1.08242	1.56716	2.01486	1.13133	1.44894	0.43568	30.0689	4		1.52474	3.37599	0.993251	1.13184	0.556875	1.05168	0.399355	37.9732	5		0.725824	0.904189	b1195
	b4048	yjbM	predicted protein	2.23672	0.641183	1.23855	1.53821	0.942784	1.31949	0.611904	46.3743	5		0.942996	0.891285	0.883223	0.922598	1.1516	0.95834	0.110681	11.5493	5		0.726296	0.259878	b4048
	b1441	ydcT	predicted spermidine/putrescine transporter subunit	1.42191	0.569339	0.824745	1.20461	0.838298	0.971782	0.338463	34.8291	5			0.664241		0.886626	0.566986	0.705951	0.163852	23.21	3		0.72645	0.187588	b1441
	b0847	ybjL	predicted transporter	4.29296			1.61977	1.08667	1.35322	0.376957	27.8563	3		0.800021	1.02108		1.0152	1.09653	0.983209	0.127617	12.9797	4		0.72657	0.306415	b0847
	b1739	osmE	DNA-binding transcriptional activator	1.61078	1.25386	1.49678	1.49084	2.67669	1.70579	0.558076	32.7165	5		0.914683	2.54046	0.918186	1.25535	0.572915	1.24032	0.765805	61.7426	5		0.727122	0.306865	b1739
	b2626	yfjJ	CP4-57 prophage; predicted protein	2.86016	2.90943	1.17607	2.0202	0.969104	1.98699	0.909409	45.7681	5		1.34653	1.78744	1.39118	1.13569	1.56407	1.44498	0.2448	16.9414	5		0.727222	0.259371	b2626
	b1110	ycfJ	predicted protein	1.67429	0.802809	1.85979	1.47277	1.02217	1.36637	0.443191	32.4357	5		0.973465		1.12362	0.676719	1.20109	0.993722	0.231498	23.296	4		0.727273	0.153788	b1110
	b1743	spy	envelope stress induced periplasmic protein	2.56247		1.2867	2.03977	1.06643	1.73884	0.689319	39.6424	4		1.01089	1.46532	1.4152	0.984191	1.44867	1.26486	0.244872	19.3597	5		0.727412	0.267151	b1743
	b3509	hdeB	acid-resistance protein	839.605		1.03287	1.253	1.73746	1.34111	0.360465	26.8781	4			0.974538	0.925928		1.02783	0.976098	0.050969	5.2217	3		0.727828	0.390283	b3509
	b3001	yghZ	aldo-keto reductase	1.18555	1.06854	1.02831	1.6508	1.05122	1.19689	0.260901	21.7984	5		0.917318	1.00975	1.01536	0.888652	0.526534	0.871522	0.20075	23.0345	5		0.728158	0.0602401	b3001
	b2627	yfjK	CP4-57 prophage; conserved protein	1.50504		1.34009	1.56315	1.0754	1.37092	0.218497	15.938	4			1.06611		0.987224	0.941619	0.998319	0.0629835	6.30896	3		0.728211	0.0364956	b2627
	b3207	yrbL	predicted protein	1.2733	0.671284	0.608332	1.19946	0.824529	0.915381	0.304517	33.2667	5		1.03225	0.595212	0.524993	0.570271	0.610427	0.666631	0.206932	31.0414	5		0.728255	0.17433	b3207
	b2389	yfeO	predicted ion channel protein	1.74886	0.608076	0.781359			1.0461	0.614746	58.7656	3			0.502354	1.16241	0.93871	0.445956	0.762358	0.345859	45.367	4		0.728763	0.525042	b2389
	b4203	rplI	50S ribosomal subunit protein L9	0.372934	0.736613	0.276747	0.185428	0.539671	0.422279	0.21926	51.9231	5		0.302061	0.252027	0.341752	0.318005	0.325326	0.307834	0.0343058	11.1443	5		0.728984	0.310298	b4203
	b4332	yjiJ	predicted inner membrane protein	0.770572		0.679384	0.72995	1.08324	0.815787	0.182163	22.3297	4		0.459854	0.515772	0.538098	0.73505	0.727022	0.595159	0.127302	21.3895	5		0.729552	0.0929193	b4332
	b3096	yqjB	conserved protein	0.885665	2.10367	0.62204		0.951225	1.14065	0.657586	57.6501	4		0.866525	1.12963	0.753935	0.837612	0.578617	0.833263	0.200058	24.009	5		0.730516	0.42557	b3096
	b2986	yghT	predicted protein with nucleoside triphosphate hydrolase domain	1.49995	1.11546	0.565303		0.946904	1.03191	0.387726	37.5738	4		0.785449	0.793496	0.552893	0.839998	0.799801	0.754327	0.114549	15.1856	5		0.731004	0.249684	b2986
	b3857	mobA	molybdopterin-guanine dinucleotide synthase	1.50606	0.640494	1.2171	1.14548	1.1374	1.12931	0.311815	27.6111	5		0.92508	0.815942	0.862806	0.823276	0.703174	0.826056	0.0811887	9.82847	5		0.731471	0.0948782	b3857
	b0227	yafL	predicted lipoprotein and C40 family peptidase	1.93619	1.1149	0.646729	0.533582	0.80289	1.00686	0.563609	55.977	5		0.705006	0.673799	0.801482	0.744362	0.758482	0.736626	0.0492212	6.68197	5		0.731609	0.344828	b0227
	b1140	intE	e14 prophage; predicted integrase	1.57994	1.1959	1.45317	1.10958	0.781037	1.22392	0.311974	25.4896	5		0.680349	0.777021		0.822827	1.30251	0.895677	0.277648	30.9987	4		0.731808	0.14013	b1140
	b2072	yegK	predicted protein	0.75885	1.84239	0.897995	0.530986	0.811033	0.968251	0.507155	52.3784	5		0.596743	0.635513	0.990758	0.611427		0.70861	0.188776	26.6404	4		0.731845	0.336384	b2072
	b2080	yegP	predicted protein	1.91025	0.772052	0.91521	1.25996	1.10191	1.19188	0.442038	37.0875	5		0.873534	0.878531	1.0205	0.671392	0.917455	0.872282	0.126892	14.5471	5		0.731855	0.185183	b2080
	b2322	yfcJ	predicted transporter	2.58521			1.14923	0.820635	1.51836	0.938416	61.8047	3		0.88346		0.93724		1.51586	1.11219	0.350626	31.5258	3		0.732494	0.541206	b2322
	b3040	zupT	zinc transporter	0.662571	1.00899	0.437062	0.943025	0.800303	0.770389	0.229324	29.7673	5		0.878421	0.472883	0.548139	0.423976	0.500276	0.564739	0.181024	32.0545	5		0.733057	0.156173	b3040
	b0439	lon	DNA-binding ATP-dependent protease La	0.385643	1.03396	0.994841	1.15735	1.18081	0.950522	0.325509	34.2453	5		0.409169	0.851709	0.75239	0.699476	0.772794	0.697107	0.170001	24.3866	5		0.733394	0.173511	b0439
	b2842	kduD	2-deoxy-D-gluconate 3-dehydrogenase	0.386665		0.88993	0.365826	3.70756	0.547474	0.296759	54.2052	4		0.481862			0.321514	1.11124	0.401688	0.113384	28.2268	3		0.733712	0.45521	b2842
	b3665	ade	cryptic adenine deaminase	0.838867	0.991575	0.900199		1.11375	0.961098	0.119556	12.4396	4		0.463711		0.745878	0.917556	0.694435	0.705395	0.187245	26.5447	4		0.733947	0.0685998	b3665
	b2352	yfdI	CPS-53 (KpLE1) prophage; predicted inner membrane protein			1.59179	2.68265	1.0976	1.79068	0.811025	45.2914	3			1.12456	1.40756	1.19884	1.52817	1.31478	0.185982	14.1454	4		0.734234	0.417176	b2352
	b4393	trpR	DNA-binding transcriptional repressor, tryptophan-binding	0.317544		1.22632		1.48241	1.35437	0.181079	13.37	3		1.60261	0.76188		0.407261	1.20784	0.994898	0.520984	52.3656	4		0.734585	0.976333	b4393
	b0519			0.882255	1.32293	0.365522	1.27432	1.08435	0.985875	0.387968	39.3527	5		0.84182	0.712786	0.61822			0.724275	0.112242	15.4971	3		0.734653	0.216938	b0519
	b2298	yfcC	predicted inner membrane protein	1.86247		0.392666	0.407007	1.04454	0.92667	0.69398	74.8896	4		2.67382	0.637618			0.724934	0.681276	0.0617416	9.06264	3		0.735187	0.614447	b2298
	b3347	fkpA	FKBP-type peptidyl-prolyl cis-trans isomerase (rotamase)	1.00473	38.0672	0.866584	0.806438	1.20632	0.971018	0.177478	18.2776	5		0.751412		0.831833	0.650054	0.62332	0.714155	0.0959099	13.4298	4		0.73547	0.359316	b3347
	b1792	yeaO	conserved protein	1.31157	0.906727	1.12406	1.03116	1.29715	1.13414	0.173549	15.3023	5		0.817961	0.843387	0.842432	0.853231	0.814255	0.834253	0.0171454	2.05517	5		0.735585	0.0177282	b1792
	b2923	argO	arginine transporter	1.0771			7.06429	1.65252	1.36481	0.406884	29.8125	3		1.10879	0.822835	1.02115	1.01749	1.0622	1.00649	0.109127	10.8423	5		0.73746	0.358021	b2923
	b0557	borD	DLP12 prophage; predicted lipoprotein			1.37772	1.25275	1.87347	1.50131	0.328296	21.8673	3			0.995552	1.31861		1.00782	1.10733	0.18308	16.5335	3		0.737571	0.16313	b0557
	b0981	etk	cryptic autophosphorylating protein tyrosine kinase Etk		1.98088	1.44218		1.52874	1.6506	0.289283	17.5259	3		1.27925	1.24597	1.30857	1.04211	1.21681	1.21854	0.10449	8.57504	5		0.738242	0.113195	b0981
	b3055	htrG	predicted signal transduction protein (SH3 domain)	0.762492			0.420128	0.564558	0.582393	0.171878	29.5123	3		0.468625	0.428533	0.387954	0.323129	0.541821	0.430013	0.082443	19.1722	5		0.738355	0.260017	b3055
	b0913	ycaI	conserved inner membrane protein	1.67112	2.26355	1.51356	1.93826	1.17417	1.71213	0.414037	24.1825	5			1.30766		1.17732	1.30812	1.26437	0.0753864	5.96237	3		0.738477	0.0719041	b0913
	b1816	yoaE	fused predicted membrane protein/conserved protein			1.35754	1.82427	1.30808	1.49663	0.284818	19.0306	3		8.3714	1.0248	0.987298	1.30375		1.10528	0.1729	15.643	4		0.738514	0.491038	b1816
	b1628	rsxB	predicted iron-sulfur protein	1.16387	0.949614	1.12788	1.37395	1.04042	1.13115	0.159077	14.0633	5		0.810926	0.694932		0.824952	1.01076	0.835392	0.130627	15.6366	4		0.738536	0.0183382	b1628
	b3026	qseC	sensory histidine kinase in two-component regulatory system with QseB		1.37904	2.15844		0.876632	1.47137	0.645874	43.896	3		1.14289	1.26108	0.862389		1.08083	1.0868	0.167248	15.3891	4		0.738629	0.411775	b3026
	b0356	frmA	alcohol dehydrogenase class III/glutathione-dependent formaldehyde dehydrogenase	2.01173			1.34971	1.19255	1.518	0.434748	28.6396	3		1.13535	1.10117	1.25943	1.01796	1.09269	1.12132	0.0882887	7.87363	5		0.738686	0.253096	b0356
	b0253	ykfA	CP4-6 prophage; predicted GTP-binding protein			1.66672	1.61493	1.17003	1.48389	0.273045	18.4006	3		1.13297	1.03266	0.809902	1.1095	1.39619	1.09624	0.21067	19.2174	5		0.738762	0.113092	b0253
	b0497	rhsD	rhsD element protein		5.75662		1.99326	0.924312	1.45878	0.755857	51.8142	3		1.34365	1.15785	0.736112			1.0792	0.31131	28.8463	3		0.739797	0.341426	b0497
	b1527	yneK	predicted protein	0.507155	1.4588	1.87551	0.588886	1.24844	1.13576	0.582773	51.3113	5		0.155497	0.416711	1.2369	0.924605	1.47253	0.84125	0.550567	65.4464	5		0.740694	0.435277	b1527
	b2237	inaA	conserved protein	0.951537	1.10054	0.574348	0.684489	0.812319	0.824646	0.208963	25.3397	5		0.421124	0.777768	0.560474	0.625109	0.669859	0.610867	0.132364	21.6682	5		0.740763	0.0960148	b2237
	b0543	emrE	DLP12 prophage; multidrug resistance protein	1.69316	0.805822		1.38879	1.06349	1.23782	0.386065	31.1892	4		0.973887	0.828066	1.13632	0.73923	0.909092	0.917319	0.150758	16.4347	5		0.741079	0.19705	b0543
	b4144	yjeI	conserved protein	0.762188	4.9243	1.0071	0.726592	1.18807	0.92099	0.217377	23.6025	5		0.633507		0.628309		0.787234	0.683017	0.0902922	13.2196	3		0.741612	0.266857	b4144
	b0965	yccU	predicted CoA-binding protein with NAD(P)-binding Rossmann-fold domain	2.26517	5.21645		1.51546	0.804308	1.52831	0.730514	47.7987	4		1.60562	0.918322	1.06065	1.02634	1.05892	1.13397	0.269976	23.808	5		0.741976	0.267886	b0965
	b1402	insD	KpLE2 phage-like element; IS2 insertion element transposase InsAB'	2.00982	1.26408	0.851472	2.10648	1.14874	1.47612	0.553288	37.4826	5		0.953914	0.910973	1.41138	1.07062	1.12973	1.09532	0.197272	18.0104	5		0.742028	0.206851	b1402
	b2732	ygbA	predicted protein	0.677218	0.975974	0.727246	0.922477	1.26047	0.912677	0.23178	25.3956	5		0.786297		0.807733	0.449034	0.667697	0.677691	0.164408	24.2601	4		0.742531	0.119262	b2732
	b3288	fmt	10-formyltetrahydrofolate:L-methionyl-tRNA(fMet) N-formyltransferase	1.79768	7.41336	1.74582	2.30215	1.19361	1.75982	0.453264	25.7563	5		1.01598	1.62721	1.57274	1.028	1.29462	1.30771	0.289757	22.1576	5		0.743094	0.239594	b3288
	b4151	frdD	fumarate reductase (anaerobic), membrane anchor subunit	0.676497	0.737423	1.05121	1.30491	1.09763	0.973534	0.262309	26.944	5		0.622944	0.914531	0.694066	0.934563	0.455946	0.72441	0.202237	27.9175	5		0.744103	0.133544	b4151
	b1434	ydcN	predicted DNA-binding transcriptional regulator	1.65272	1.1138	1.63003	1.82117	0.931764	1.4299	0.384335	26.8785	5		1.03541	1.1685	1.45697		0.604604	1.06637	0.354583	33.2513	4		0.745768	0.185744	b1434
	b1506			1.8562	2.22031	1.10011	1.85592	1.0542	1.61735	0.515319	31.8619	5		1.06695	1.90856	1.04986	0.892682	1.12013	1.20764	0.400885	33.1958	5		0.746676	0.200346	b1506
	b2422	cysA	sulfate/thiosulfate transporter subunit	2.45592	1.00167	0.369036		0.961045	1.19692	0.887737	74.1687	4		7.50575	1.33265	0.564039		0.787	0.894563	0.395435	44.2042	4		0.74739	0.482829	b2422
	b1010	rutC	conserved protein		0.90688	1.47496	0.799913	1.08247	1.06606	0.296446	27.8078	4		0.282478	0.901049		0.834008	1.17068	0.797054	0.372633	46.7513	4		0.747667	0.303742	b1010
	b3872	yihL	predicted DNA-binding transcriptional regulator	1.70212		1.18793	2.02058	0.879247	1.44747	0.511058	35.307	4		3.44101	1.11651		1.04823		1.08237	0.0482829	4.46083	3		0.74777	0.653182	b3872
	b1760	ynjH	predicted protein	1.16908		1.03695	1.43535	0.87626	1.12941	0.236509	20.9409	4		0.957682	0.637296	1.09056	0.720835	0.816832	0.844642	0.181899	21.5357	5		0.74786	0.0981428	b1760
	b3345	yheN	predicted intracellular sulfur oxidation protein	1.75452			0.434183	0.992181	1.06029	0.662796	62.5107	3		0.754942	0.789389		0.835067		0.793133	0.0401936	5.0677	3		0.748032	0.557527	b3345
	b2537	hcaR	DNA-binding transcriptional activator of 3-phenylpropionic acid catabolism	0.417895	0.731551	0.881388		1.04503	0.768965	0.266771	34.6921	4		0.421103	0.579419	0.72516			0.575227	0.152072	26.4368	3		0.748054	0.28125	b2537
	b1364			4.44061	2.35141	0.882859	1.34733	0.956289	1.38447	0.676093	48.834	5		0.954656	0.995147	1.09223	0.922758	1.21408	1.03577	0.118304	11.4218	5		0.748137	0.222684	b1364
	b4107	yjdN	conserved protein	0.77376		0.755922	1.80186	0.959076	1.07265	0.494736	46.1227	4		0.922306	0.836736			0.650391	0.803145	0.139035	17.3113	3		0.748746	0.364501	b4107
	b2310	argT	lysine/arginine/ornithine transporter subunit	0.679802		0.568206		1.06555	0.771187	0.260964	33.8393	3		0.392588	0.536546	0.491408	0.385892	1.08223	0.577733	0.289288	50.0729	5		0.749148	0.376983	b2310
	b0844	ybjI	conserved protein	1.67592	0.990371	1.29666	1.62025	1.14662	1.34596	0.296951	22.0624	5		1.08487		1.12736	0.813856		1.00869	0.170068	16.8602	3		0.749422	0.087276	b0844
	b0699	ybfA	predicted protein		1.13256		4.0183	1.34425	1.23841	0.149683	12.0868	3		0.894524	0.942032		1.04698	0.831995	0.928884	0.0907164	9.76618	4		0.750063	0.314506	b0699
	b3675	yidG	predicted inner membrane protein	0.632129	0.824887	0.988588	0.269265	1.09847	0.762668	0.32717	42.8981	5		0.380579	0.648718			0.686856	0.572051	0.166913	29.1779	3		0.750066	0.318525	b3675
	b1791	yeaN	predicted transporter	1.33469		0.715124	0.817725	3.0175	0.955846	0.332073	34.7413	4		0.645964	3.46328	0.685473	0.716284	0.822503	0.717556	0.075653	10.5431	5		0.750702	0.797171	b1791
	b2840	ygeA	predicted racemase		1.60801	0.606884	9.23846	0.964777	1.05989	0.507297	47.8631	4		2.26514	0.940104	0.459643	0.992692	0.791098	0.795884	0.239871	30.1389	5		0.750911	0.400981	b2840
	b4031	xylE	D-xylose transporter	3.76217	1.08245	1.3907	1.44978	1.04651	1.24236	0.20733	16.6884	5		0.758172	0.982113		1.06457	0.928136	0.933248	0.1295	13.8763	4		0.75119	0.186925	b4031
	b3684	yidP	predicted DNA-binding transcriptional regulator		0.512869	1.45494	1.30008	0.958448	1.05659	0.417627	39.5261	4		0.77792	0.632982	0.820522	0.955023	0.784406	0.79417	0.11501	14.4817	5		0.751639	0.300921	b3684
	b2071	yegJ	predicted protein	3.92032			1.5001	1.14906	1.32458	0.248224	18.7399	3			0.793606	1.00238	1.19155		0.995848	0.199054	19.9884	3		0.751822	0.303342	b2071
	b1511	lsrK	autoinducer-2 (AI-2) kinase	1.44735		1.30673	2.13044	0.713547	1.39951	0.581864	41.5762	4		1.42597	0.796288	1.27701	0.709996		1.05232	0.352533	33.5006	4		0.751915	0.354754	b1511
	b2606	rplS	50S ribosomal subunit protein L19	0.757661	1.02525	1.10472	0.823622	0.996365	0.941524	0.145221	15.4241	5			0.601189	0.776739	0.921517	0.534074	0.70838	0.175093	24.7174	4		0.752376	0.0772413	b2606
	b1932	yedL	predicted acyltransferase		4.49683		2.28697	1.01643	1.6517	0.898406	54.3928	3		0.94812	1.41469	1.31578	1.14903	1.38868	1.24326	0.194795	15.6681	5		0.752715	0.313432	b1932
	b3239	yhcO	predicted barnase inhibitor	2.48882	1.27041	1.28896	7.00306	1.19373	1.56048	0.620264	39.7483	5		0.94944	1.27024	1.29968	1.20479	1.15541	1.17591	0.138528	11.7804	5		0.753556	0.257069	b3239
	b2930	yggF	predicted hexoseP phosphatase	1.68225	0.56464	0.787544	1.94792	1.02182	1.20084	0.591079	49.2223	5		1.08988	1.04308	0.939352	0.833934	0.620206	0.905291	0.187474	20.7087	5		0.753884	0.337221	b2930
	b3169	nusA	transcription termination/antitermination L factor	1.89336	12.8958	0.413657	1.46146	1.48095	1.61192	0.243927	15.1326	5		1.73952	1.0484	0.983937	1.12424	1.18559	1.21634	0.302224	24.8471	5		0.754586	0.359206	b3169
	b1228	ychS	predicted protein	0.201303	0.288179	0.330964	0.54231	1.04099	0.340689	0.144835	42.5124	5		0.364945	0.312557	0.1904	0.204034	0.213824	0.257152	0.077207	30.0239	5		0.754799	0.215544	b1228
	b4196	ulaD	3-keto-L-gulonate 6-phosphate decarboxylase	0.990007	0.57308	0.624537	1.67056	0.910205	0.953678	0.438839	46.0155	5		5.57724	1.11081	0.507644		0.542006	0.720153	0.338754	47.0391	4		0.755132	0.483424	b4196
	b4127	yjdJ	predicted acyltransferase with acyl-CoA N-acyltransferase domain	6.84772	1.1543	1.40024	1.17009	1.00663	1.18282	0.162575	13.7447	5		0.678456	1.05431	0.916065	1.03106	0.787065	0.893392	0.160363	17.9499	5		0.755309	0.278602	b4127
	b0683	fur	DNA-binding transcriptional dual regulator of siderophore biosynthesis and transport	0.355957	0.310452	0.550425	0.659499	0.856227	0.546512	0.22402	40.9909	5			0.442755		0.425928	0.370423	0.413036	0.0378502	9.16391	3		0.755767	0.257405	b0683
	b2409	yfeR	predicted DNA-binding transcriptional regulator		1.37227	1.02132	1.68984	0.921841	1.25132	0.35042	28.0041	4		0.634496	1.20939		0.993498		0.945794	0.290399	30.7043	3		0.75584	0.264652	b2409
	b0619	dpiB	sensory histidine kinase in two-component regulatory system with citB	1.15086	0.753675	0.974383		0.926972	0.951472	0.163303	17.1632	4		0.592147	0.736653	0.576853	0.87904	0.811342	0.719207	0.132993	18.4916	5		0.755889	0.0626269	b0619
	b1470	yddJ	predicted protein	1.88622	1.01987	1.94014	1.49035	0.955079	1.45833	0.464157	31.828	5		0.973462		1.41628	0.921392		1.10371	0.27194	24.6387	3		0.756831	0.222151	b1470
	b2625	yfjI	CP4-57 prophage; predicted protein	1.66046	2.75438	1.39944	1.23458	1.54437	1.71865	0.600563	34.9439	5		1.24596	0.950555	1.18038		1.82607	1.30074	0.372422	28.6315	4		0.756841	0.243479	b2625
	b0551	ybcQ	DLP12 prophage; predicted antitermination protein	5.18273	1.00501	1.51421		1.93519	1.48481	0.465788	31.3703	4		8.34829	1.79811	0.915345	1.06639	0.718618	1.12462	0.471031	41.8837	5		0.757417	0.929273	b0551
	b3240	aaeB	p-hydroxybenzoic acid efflux system component	1.64454	0.338307	0.803142	1.72967	0.759296	1.05499	0.605652	57.4083	5		5.59172	0.916251	1.12344	0.660053	0.497842	0.799397	0.276292	34.5626	5		0.757728	0.516597	b3240
	b2014	yeeF	predicted amino-acid transporter	3.38587	1.7449	1.5925	1.02907	1.02278	1.75503	0.968164	55.1652	5		1.01092	1.35627	1.76772	1.01827	1.49687	1.33001	0.323699	24.3381	5		0.75783	0.395572	b2014
	b1929	yedE	predicted inner membrane protein	0.87523			0.560288	1.39233	0.942614	0.420092	44.5667	3		0.53257	0.612903	0.819846	0.892982		0.714575	0.16968	23.7456	4		0.758078	0.451991	b1929
	b2739	ygbM	conserved protein	1.18275	0.763706	0.917251	1.65529	0.971007	1.098	0.3458	31.4935	5		0.728091	0.583929	0.972792	1.19456	0.68309	0.832492	0.247881	29.7758	5		0.758188	0.204135	b2739
	b3747	kup	potassium transporter	1.43104	1.25061	0.581511	2.60245	1.18997	1.41111	0.738677	52.3471	5			1.07757	1.17818		0.954375	1.07004	0.11209	10.4753	3		0.758295	0.364528	b3747
	b2844	yqeF	predicted acyltransferase	0.712712		0.78798	1.05015	1.07644	0.90682	0.183589	20.2454	4		0.824611	0.345796	0.551819	0.519786	1.197	0.687802	0.332297	48.3129	5		0.758476	0.253783	b2844
	b1699	ydiS	predicted oxidoreductase with FAD/NAD(P)-binding domain	0.705259	0.900912	0.609074	2.29853	0.96814	0.795846	0.167147	21.0024	5			0.510886	0.43489	0.611491	0.858257	0.603881	0.184365	30.5299	4		0.758791	0.189145	b1699
	b4266	idnO	5-keto-D-gluconate-5-reductase	1.19759	0.306823	0.683555	0.570052	0.77446	0.706495	0.325834	46.1198	5		0.269406	0.508856	0.714176	0.60021	0.593601	0.53725	0.166575	31.0051	5		0.760443	0.341206	b4266
	b1012	rutA	predicted monooxygenase	1.06425		0.730824	1.33973	0.907728	1.01063	0.258237	25.552	4		0.815714	1.19859	0.535899	0.862312	0.436265	0.769755	0.3002	38.9994	5		0.761657	0.237423	b1012
	b2787	gudD	(D)-glucarate dehydratase 1	1.51102	0.836533	1.14656	1.86272	1.00202	1.27177	0.413622	32.5234	5		1.06127		0.519492	1.09406	1.20514	0.969989	0.306578	31.6063	4		0.762709	0.249425	b2787
	b3918	cdh	CDP-diacylglycerol phosphotidylhydrolase	0.878346		0.904657	0.580421	1.83765	1.05027	0.545126	51.9035	4			0.610211	0.628283	0.867095	1.09903	0.801155	0.230523	28.7738	4		0.762809	0.446852	b3918
	b2209	eco	ecotin, a serine protease inhibitor	1.44901	1.46402	1.17946	1.08249	1.04962	1.24492	0.199041	15.9882	5		0.899197	0.980374	0.969805			0.949792	0.0441344	4.64674	3		0.762933	0.0271809	b2209
	b2069	yegD	predicted chaperone	2.10713		0.865381	1.17615	1.12481	1.31837	0.543147	41.1985	4		0.28164	1.35172		1.53416	0.856053	1.00589	0.561442	55.8154	4		0.762983	0.454232	b2069
	b1729	ydjN	predicted transporter	1.63993	0.458438	1.67743	1.26544	0.983242	1.2049	0.505604	41.9624	5			0.943605		1.13648	0.678469	0.919519	0.229955	25.0082	3		0.763152	0.319269	b1729
	b3501	arsR	DNA-binding transcriptional repressor	5.29166		1.06017	3.71524	1.12344	1.96628	1.51497	77.0475	4		2.62806	1.57656	0.738734	1.07944		1.5057	0.823537	54.6947	4		0.765759	0.312194	b3501
	b2034	wbbI	conserved protein	1.47328			1.70899	0.891821	1.35803	0.420599	30.9712	3		20.3278	1.42451	1.40844		1.32906	1.0405	0.051108	4.91185	4		0.766184	0.388648	b2034
	b1837	yebW	predicted protein	0.18143	1.45106	0.314723	0.632278	0.636635	0.441267	0.229625	52.0376	5		0.304745	0.364055	0.432732	0.181004	0.409044	0.338316	0.100565	29.7252	5		0.766693	0.242105	b1837
	b3175	secG	preprotein translocase membrane subunit	1.3863	2.64957	0.846834		1.54388	1.60665	0.756639	47.0943	4		3.78438	1.64413	0.597859	1.45344		1.23181	0.557236	45.2371	4		0.766696	0.748977	b3175
	b4158	yjeO	conserved inner membrane protein	2.50349	0.635697	1.25917	1.86312	0.893139	1.43092	0.756355	52.8578	5		1.04344	1.01697	1.32211	0.883116	1.2212	1.09737	0.17401	15.8571	5		0.766895	0.386096	b4158
	b0533	sfmH	predicted fimbrial-like adhesin protein	1.54849	3.48924		1.39872	0.787592	1.24493	0.403086	32.3781	4		0.775707	1.04513	0.865631	1.02077	1.06977	0.955402	0.128212	13.4197	5		0.767432	0.241851	b0533
	b2603	yfiR	predicted protein	0.184001			0.376583	0.37088	0.310488	0.109578	35.2921	3		0.287581	0.2273	0.207049	0.169703	0.300143	0.238355	0.0549005	23.0331	5		0.767679	0.375898	b2603
	b1462	yddH	conserved protein	1.7435	0.51104	0.84952		0.923132	1.0068	0.522892	51.9361	4		0.863445	0.747147	0.769361	0.813996	0.670898	0.772969	0.0724008	9.36658	5		0.767749	0.438363	b1462
	b4012	yjaB	predicted acetyltransferase	0.7956	0.640283	0.567159	1.61336	0.894455	0.902171	0.417738	46.3036	5		0.801454	0.703051	0.632392	0.72512	0.602294	0.692862	0.0787335	11.3635	5		0.767995	0.328879	b4012
	b1057	yceJ	predicted cytochrome b561	1.84573	0.729464	1.44511	1.85069	1.16851	1.4079	0.47611	33.817	5		1.28093	0.954832	1.34326	1.04626	0.782314	1.08152	0.231888	21.441	5		0.768179	0.219003	b1057
	b4110	yjcZ	conserved protein	1.27299	1.16017	1.41411	1.82813	0.911003	1.31728	0.33987	25.8009	5				1.43041	0.694757	0.911856	1.01234	0.377979	37.3372	3		0.768508	0.316258	b4110
	b2222	atoA	acetyl-CoA:acetoacetyl-CoA transferase, beta subunit	2.0792	0.443819	0.891337	1.73293	0.870467	1.20355	0.676872	56.2396	5		1.07973	0.928724	0.805049	1.12301	0.689227	0.925147	0.182441	19.7202	5		0.768681	0.418732	b2222
	b1557	cspB	Qin prophage; cold shock protein	1.34455	0.909925	1.23424	1.25338	1.08428	1.16528	0.170605	14.6407	5		0.882553	0.837286	0.539189	1.296	0.926616	0.89633	0.270131	30.1375	5		0.769199	0.103358	b1557
	b1585	ynfC	predicted protein	1.89273		1.30548	1.31072	0.864164	1.34327	0.421873	31.4064	4		1.31803	0.820762	1.27931	0.693583	1.0579	1.03392	0.275126	26.61	5		0.7697	0.261465	b1585
	b1537	ydeJ	conserved protein	1.96403	1.82315	1.87621	1.25943	1.1942	1.6234	0.366239	22.56	5		0.908753	1.0439	1.58779	1.05572	1.65859	1.25095	0.345585	27.6258	5		0.770573	0.136869	b1537
	b1942	fliJ	flagellar protein		0.784018	1.81391	1.19524	0.97953	1.19317	0.446604	37.4299	4		0.97809	0.693045	1.04718	0.960026		0.919586	0.155628	16.9237	4		0.770706	0.316174	b1942
	b0615	citF	citrate lyase, citrate-ACP transferase (alpha) subunit	1.57516	0.444159	0.554991	1.83819	1.32752	1.148	0.620102	54.0157	5		0.89591	0.997541	0.99629		0.649686	0.884857	0.163852	18.5174	4		0.770779	0.407228	b0615
	b1279	yciS	conserved inner membrane protein		0.830704	1.14882	1.38012	1.03438	1.09851	0.22925	20.8693	4		0.976187	0.821256	1.20682	0.4411	0.793315	0.847736	0.280383	33.0743	5		0.771717	0.183552	b1279
	b1795	yeaQ	conserved inner membrane protein	2.14131	0.96695	1.8136	1.72292	1.08963	1.54688	0.500217	32.3371	5		0.898303	1.55587		1.2462	1.07519	1.19389	0.280015	23.454	4		0.771804	0.226392	b1795
	b1722	ydiY	conserved protein	0.77602		1.00006	0.537999	0.599617	0.728423	0.207286	28.4568	4		0.687315	0.410975	0.517154	0.46147	0.734307	0.562244	0.141703	25.2031	5		0.771865	0.228261	b1722
	b2622	intA	CP4-57 prophage; integrase		1.27458	1.7217	2.10282	1.03051	1.5324	0.475949	31.059	4		0.993446	1.19549	1.25546	0.996875	1.47607	1.18347	0.201164	16.9978	5		0.772295	0.24453	b2622
	b4347	yjiW	conserved protein	1.02713	0.89254	0.948598	1.76699	0.844206	1.09589	0.381277	34.7915	5		0.927645	0.717843	1.19164	0.646771	0.748557	0.846492	0.218944	25.8648	5		0.772423	0.248979	b4347
	b1987	cbl	DNA-binding transcriptional activator of cysteine biosynthesis	1.47809	1.36398	1.30992	1.68229	0.869146	1.34068	0.299754	22.3583	5			1.14908	0.971002	0.75103	1.27138	1.03562	0.226291	21.8507	4		0.772459	0.125615	b1987
	b2648			2.00121		0.949176	2.84469	1.19016	1.74631	0.859483	49.2171	4		1.17743	1.08775	1.59863	1.08697	1.79653	1.34946	0.32747	24.2667	5		0.77275	0.435123	b2648
	b4125	dcuS	sensory histidine kinase in two-component regulatory system with DcuR, regulator of anaerobic fumarate respiration	0.25375	0.997503		1.09001	0.706196	0.761865	0.376159	49.3734	4		0.499826	0.522182	0.644689	0.554784	0.723484	0.588993	0.0932397	15.8304	5		0.773093	0.43021	b4125
	b1182	hlyE	hemolysin E	1.32466	1.81958	1.87209	1.06005	1.20156	1.45559	0.368812	25.3377	5		0.740792	1.15001	1.38467	1.22616		1.12541	0.27441	24.3832	4		0.773165	0.167771	b1182
	b0441	ppiD	peptidyl-prolyl cis-trans isomerase (rotamase D)	0.776011	0.801365	0.822564	0.886934	0.862803	0.829935	0.0450209	5.42463	5		0.640498	0.650883	0.633211	0.592805	0.691115	0.641703	0.0353215	5.50433	5		0.773196	0.00010517	b0441
	b1957	yodC	predicted protein		1.79295		5.46497	1.33749	1.56522	0.322058	20.5759	3		1.35656	1.23736	1.0712	1.20734	1.17883	1.21026	0.103042	8.51405	5		0.77322	0.3328	b1957
	b0245	ykfI	CP4-6 prophage; toxin of the YkfI-YafW toxin-antitoxin system	2.58105	1.84061		1.75343	1.06187	1.80924	0.621383	34.345	4		1.34028	1.33012	1.62447	1.3044		1.39982	0.150526	10.7532	4		0.773703	0.281736	b0245
	b2147	yeiA	predicted oxidoreductase		1.89513		1.69891	1.21525	1.6031	0.34992	21.8277	3		1.01929	1.4336	1.26926			1.24072	0.208622	16.8147	3		0.77395	0.213831	b2147
	b3489			2.35593	1.18098	1.48211	1.11064	0.91782	1.4095	0.566633	40.2011	5		0.999297	0.85785	1.43464	1.07324		1.09126	0.245744	22.5194	4		0.774217	0.303892	b3489
	b2999			1.51904		0.548157	1.6139	0.989361	1.16761	0.496042	42.4834	4		1.39518	0.869898	0.597379	0.991113	0.66887	0.904489	0.315956	34.932	5		0.774647	0.399928	b2999
	b3443			1.8666	6.56074		1.24133	1.1588	1.42224	0.387031	27.2127	4		1.52287	1.01027	0.814256	1.06174		1.10228	0.299981	27.2145	4		0.775033	0.303803	b3443
	b0112	aroP	aromatic amino acid transporter	1.23154		0.431209	5.59114	1.86436	1.1757	0.718206	61.0874	4			0.987346	1.07518	0.932201	0.650117	0.911212	0.183752	20.1657	4		0.775036	0.317225	b0112
	b0043	fixC	predicted oxidoreductase with FAD/NAD(P)-binding domain	0.347148	0.328992	0.433565	3.26263	1.11999	0.557425	0.377811	67.7779	5		0.4513	0.413905	0.251721	0.506473	0.540004	0.432681	0.11226	25.9452	5		0.776213	0.301305	b0043
	b3491	yhiM	conserved inner membrane protein	1.82295	0.951181	1.00597	1.98612	1.3625	1.42574	0.468297	32.8459	5		1.06833	1.0718	1.64923	0.894218	0.8513	1.10698	0.319143	28.8302	5		0.776421	0.2485	b3491
	b2920	scpC	propionyl-CoA:succinate-CoA transferase	0.412243		0.327817		0.900685	0.546915	0.309268	56.5478	3		0.493412	0.362671		0.374734	0.467866	0.424671	0.0656477	15.4585	4		0.776484	0.56623	b2920
	b2793	syd	predicted protein	0.366001			0.390844	0.713614	0.490153	0.193921	39.5634	3		0.404776	0.365764	0.364681	0.270069	0.497884	0.380635	0.0822051	21.5968	5		0.776563	0.435188	b2793
	b0876	ybjD	conserved protein with nucleoside triphosphate hydrolase domain		1.98357	1.09654	12.4072	1.15732	1.41248	0.495518	35.0815	4		1.03191	0.952013	1.26155	0.989278	1.25227	1.0974	0.148364	13.5195	5		0.776936	0.347406	b0876
	b1428	ydcK	predicted enzyme	53.1727	2.0642	0.789325	1.8104	1.00326	1.4168	0.828347	58.4662	5		1.12876	0.906032	1.23804	1.00291	1.22834	1.10081	0.144393	13.117	5		0.776974	0.361113	b1428
	b0065	yabI	conserved inner membrane protein	0.770169	0.70606	1.22293	0.936545	1.08168	0.943477	0.214269	22.7106	5		0.533623	0.736274	0.950461	0.784827	0.661608	0.733358	0.153975	20.9959	5		0.777294	0.116643	b0065
	b1498	ydeN	conserved protein	1.1452	1.09957	1.62226		2.30701	1.54351	0.561208	36.3592	4		0.876988	1.43678	1.58167	1.05017	1.05566	1.20026	0.295532	24.6224	5		0.777615	0.326235	b1498
	b3513	mdtE	multidrug resistance efflux transporter	0.563079	1.62489	1.3876	1.04367	1.17742	1.15933	0.399399	34.4507	5				0.989555	0.963407	0.75354	0.902167	0.129377	14.3407	3		0.778177	0.239361	b3513
	b0124	gcd	glucose dehydrogenase		0.803625	0.963781	1.57253	0.885995	1.05648	0.350192	33.1469	4		0.871135	0.683247	0.692624	0.884296	0.979655	0.822192	0.129557	15.7576	5		0.778234	0.278711	b0124
	b3524	yhjG	predicted outer membrane biogenesis protein	1.3515	0.656849	0.578577	1.7292	0.949389	1.0531	0.484535	46.0102	5		0.831868	0.894328	1.01974	0.846436	0.506482	0.819771	0.190102	23.1896	5		0.778435	0.360463	b3524
	b1060	bssS	predicted protein	1.03921	1.0202	0.749303	1.90163	1.10904	1.16388	0.434551	37.3365	5		0.786056	1.27779	1.05227	0.657988	0.764239	0.907667	0.252784	27.8498	5		0.779865	0.295129	b1060
	b2474	ypfI	predicted hydrolase	1.53727	4.63925	1.29551	1.78106	1.64659	1.56511	0.205534	13.1322	5		1.04005	1.16325	1.45887			1.22072	0.215245	17.6326	3		0.779961	0.198752	b2474
	b2933	cmtA	predicted fused mannitol-specific PTS enzymes: IIB component/IIC component	7.20679		0.564663	1.15799	1.26622	0.996291	0.377698	37.9104	4			0.77554	0.804123	0.751953		0.777205	0.0261252	3.36143	3		0.780099	0.338674	b2933
	b2634	yfjR	CP4-57 prophage; predicted DNA-binding transcriptional regulator	3.23958	0.449093		0.463839	1.41959	1.39303	1.31211	94.191	4		0.937294	0.898115	1.18531	1.21056	1.20581	1.08742	0.155833	14.3306	5		0.780615	0.674094	b2634
	b0392			1.85742	0.615654		1.61319	1.02684	1.27828	0.56269	44.0194	4		0.948343	1.13416	1.05279	0.901713	0.956005	0.998602	0.0935949	9.37259	5		0.781211	0.395192	b0392
	b4064	yjcD	predicted permease	0.506559	1.19867	0.596527	0.678332	0.96863	0.789743	0.286861	36.3234	5		0.657947	0.660091	0.555855	0.596519		0.617603	0.0506303	8.19787	4		0.78203	0.25369	b4064
	b1772	ydjH	predicted kinase		1.36214	1.49821	1.56134	1.07259	1.37357	0.217189	15.812	4		0.724037	1.0575	1.11711	1.32348	1.15354	1.07513	0.219754	20.4397	5		0.782728	0.0834151	b1772
	b1595	ynfL	predicted DNA-binding transcriptional regulator	1.91511	0.956966	1.82481	1.85328	1.00344	1.51072	0.485672	32.1484	5		0.704637	1.50289	1.51113	1.09925	1.09627	1.18284	0.336662	28.4623	5		0.782961	0.25403	b1595
	b1625	cnu	predicted regulator	1.33104	1.8272	1.42419	1.97376	1.16037	1.54331	0.343429	22.2527	5		1.0435	1.43667		1.14512		1.20843	0.204089	16.8888	3		0.783011	0.134672	b1625
	b3372			1.41132	0.521205	0.561569	1.21651	0.85348	0.912815	0.394013	43.1646	5		0.984344	0.648762	0.487302	0.906182	0.550001	0.715318	0.219405	30.6724	5		0.783639	0.363762	b3372
	b4252	yjgK	conserved protein			0.903881	2.07638	0.837541	1.2726	0.696883	54.7605	3		1.41152	0.758694	0.763325		1.05756	0.997773	0.309237	30.9927	4		0.784043	0.575453	b4252
	b0436	tig	peptidyl-prolyl cis/trans isomerase (trigger factor)	0.621753		0.487623	0.390085	1.1699	0.667341	0.348242	52.1835	4		3.03672			0.511206	0.535385	0.523296	0.0170968	3.26714	3		0.78415	0.496707	b0436
	b0150	fhuA	ferrichrome outer membrane transporter	0.269716	0.486932	0.483295	0.259022	0.715277	0.442848	0.188125	42.4806	5		0.260139	0.369862	0.337692	0.258693	0.510625	0.347402	0.10335	29.7493	5		0.784472	0.357204	b0150
	b3537	bcsF	predicted protein	3.74802	1.495	0.748206	1.20143	1.63058	1.2688	0.39056	30.7817	5		1.62829	0.868753	0.841995	0.845111	0.79546	0.995921	0.3545	35.5952	5		0.784929	0.218418	b3537
	b2210	mqo	malate dehydrogenase, FAD/NAD(P)-binding domain	1.15677	0.567115	0.651009	1.16089	0.799114	0.866979	0.279073	32.1892	5			0.564476	0.748795	0.661106	0.74835	0.680682	0.0877597	12.8929	4		0.785119	0.21868	b2210
	b4139	aspA	aspartate ammonia-lyase	0.47057	0.721268	0.483293	0.441852	0.875149	0.598426	0.190908	31.9017	5		0.391763	0.7786	0.295781	0.388029	0.495066	0.469848	0.18645	39.6831	5		0.785139	0.312723	b4139
	b1673	ydhV	predicted oxidoreductase	0.567737	0.888042	0.499231	0.595959	1.15413	0.74102	0.274684	37.0684	5			0.57671	0.537789	0.631936		0.582145	0.0473083	8.12656	3		0.7856	0.269759	b1673
	b1381	ydbH	predicted protein		1.41851	1.48594	2.45647	0.8024	1.54083	0.683532	44.3614	4		1.31554	1.04183	1.02948	1.13858	1.52892	1.21087	0.211434	17.4614	5		0.785857	0.412337	b1381
	b2893	dsbC	protein disulfide isomerase II	1.26141	0.799491	0.763657		0.865783	0.922586	0.229812	24.9095	4		0.514586	0.606968		0.866089	0.91493	0.725643	0.195093	26.8855	4		0.786532	0.240388	b2893
	b2198	ccmD	cytochrome c biogenesis protein	6.60546	1.52789	0.703446	1.37758	0.782242	1.09779	0.41567	37.8643	5		0.931669		0.846723	0.846693	0.828859	0.863486	0.0462275	5.35359	4		0.786568	0.296403	b2198
	b3267	yhdV	predicted outer membrane protein	1.37555	4.62498		1.41273	1.08082	1.2897	0.181848	14.0999	4		1.142	0.987038	1.17667	0.848019	0.921099	1.01496	0.141197	13.9116	5		0.786975	0.277438	b3267
	b3152	yraR	predicted nucleoside-diphosphate-sugar epimerase			0.808395	0.62141	2.31375	0.714902	0.132218	18.4946	3		4.56696	0.523564	0.601802			0.562683	0.0553221	9.83185	3		0.787077	0.68618	b3152
	b3882	yihU	predicted oxidoreductase with NAD(P)-binding Rossmann-fold domain	0.471161	0.285603	0.598722	0.60069	1.01109	0.593454	0.266566	44.9177	5		0.244635	0.686178	0.279244	0.531038	0.594394	0.467098	0.195619	41.8797	5		0.787084	0.419832	b3882
	b1551	ynfN	Qin prophage; predicted protein		2.19636		1.07398	0.958889	1.40974	0.683655	48.495	3		0.832144	1.18267		0.854586	1.5733	1.11068	0.347549	31.2916	4		0.787857	0.541471	b1551
	b0109	nadC	quinolinate phosphoribosyltransferase	0.637663	0.715037	0.557745	0.401395	0.889728	0.640314	0.181451	28.3378	5		0.691975	0.432778	0.372941	0.412107	0.613877	0.504736	0.13973	27.6839	5		0.788263	0.224459	b0109
	b1723	pfkB	6-phosphofructokinase II	1.15594	0.891833	1.00876	0.960507	1.25798	1.05501	0.149233	14.1452	5		0.953839	0.762124	0.546302	0.906092	0.991636	0.831999	0.181882	21.8608	5		0.78862	0.0681788	b1723
	b1155	ymfS	e14 prophage; predicted protein	2.18009	0.909529	1.55249	1.46707	2.0159	1.62502	0.500756	30.8155	5		0.982334	1.25024	1.40685	1.37576	1.39293	1.28162	0.178531	13.9301	5		0.788683	0.208246	b1155
	b2361	yfdR	CPS-53 (KpLE1) prophage; conserved protein	1.86799	1.0197	0.630928	2.00468	1.10643	1.32594	0.587264	44.2902	5		0.923053	1.27448	1.10869	0.85683	1.0667	1.04595	0.163909	15.6708	5		0.788834	0.355219	b2361
	b2364	dsdC	DNA-binding transcriptional dual regulator	0.541882	1.15309	0.422486	1.28013	0.857966	0.851111	0.37237	43.751	5		0.763079	0.72837	0.81257	0.500837	0.554742	0.67192	0.136271	20.2808	5		0.789462	0.358175	b2364
	b1456			0.298754	0.221345	0.560351	0.282038	0.800602	0.432618	0.243392	56.2603	5		0.257246	0.437037	0.330444			0.341576	0.0904107	26.4687	3		0.789555	0.481918	b1456
	b3137	kbaY	tagatose 6-phosphate aldolase 1, kbaY subunit		0.498681	0.802778	1.60729	1.03912	0.986967	0.468996	47.5189	4		1.24673	0.641386		0.494771	0.734704	0.779397	0.32683	41.9337	4		0.789689	0.498181	b3137
	b0545	ybcL	DLP12 prophage; predicted kinase inhibitor	2.22412	1.05825	1.81806	1.96264	1.09405	1.63142	0.527526	32.3353	5		1.00818	1.60855	1.55066		0.988559	1.28899	0.336504	26.106	4		0.790102	0.277151	b0545
	b1586	ynfD	predicted protein	1.53995		1.14603	1.40316	1.0186	1.27693	0.237336	18.5864	4		0.914549	0.86045	1.42118	0.840323		1.00912	0.276483	27.3983	4		0.790271	0.193077	b1586
	b2145	yeiS	predicted inner membrane protein	1.90066	1.10859	1.28339	1.63639	1.20855	1.42752	0.330877	23.1785	5		0.0398437	1.20522	1.36025	1.43125	1.60488	1.12829	0.625172	55.4089	5		0.790386	0.380252	b2145
	b1589	ynfG	oxidoreductase, Fe-S subunit	2.25734	1.2294	0.927395	1.59283	0.578757	1.31714	0.645133	48.9797	5		1.45501	1.00374	1.17573	0.688291	0.882583	1.04107	0.291737	28.0228	5		0.790399	0.419259	b1589
	b2214	apbE	predicted thiamine biosynthesis lipoprotein	0.88628	1.31727	0.596396	1.11447	0.912674	0.965418	0.269832	27.9498	5			0.780996		0.76399	0.745472	0.763486	0.0177675	2.32715	3		0.790834	0.169753	b2214
	b1813	nudL	predicted NUDIX hydrolase	0.591454	1.40036	0.736035	0.395077	0.868032	0.798191	0.379667	47.5659	5		0.457635	0.446093	0.777963	0.586917	0.890634	0.631849	0.196973	31.1741	5		0.791601	0.417894	b1813
	b4177	purA	adenylosuccinate synthetase	0.348816	0.428617	0.194129	0.374518	0.62681	0.394578	0.156338	39.6216	5		0.359835	0.27619	0.239911	0.403287	0.283939	0.312632	0.0668695	21.3892	5		0.792321	0.326845	b4177
	b0830	gsiB	predicted peptide transporter subunit: periplasmic-binding component of ABC superfamily	1.25957	0.483218	0.847559	1.1018	0.976615	0.933752	0.294383	31.5268	5		0.709793	0.577777	0.652151	1.14633	0.613308	0.739871	0.232432	31.4152	5		0.792363	0.282826	b0830
	b3594	yibA	lyase containing HEAT-repeat	0.679006		1.22437	0.303815	1.83938	1.01164	0.668847	66.1149	4		0.479081	0.646224	0.769643	0.962217	1.15146	0.801726	0.263336	32.8461	5		0.792499	0.587676	b3594
	b2777	ygcF	conserved protein	1.45773		0.842077	1.22615	1.13075	1.16418	0.254872	21.8929	4		1.00726	0.786512	0.99442	0.817375	1.00827	0.922766	0.110968	12.0256	5		0.792635	0.153905	b2777
	b0077	ilvI	acetolactate synthase III, large subunit	0.813409		0.795004	1.2149	1.30437	1.03192	0.265572	25.7357	4		0.532309	1.06875	0.780389	0.938947	0.76962	0.818002	0.20179	24.6687	5		0.792699	0.235022	b0077
	b1902	ftnB	predicted ferritin-like protein	0.393839	0.821407	0.734878	1.42957	0.765589	0.829057	0.375164	45.2518	5		0.706392	0.646361	0.79208	0.387615	0.753884	0.657266	0.160276	24.3853	5		0.792788	0.3865	b1902
	b0298	insE	IS3 element protein InsE	0.381425	1.4611	1.07916	0.796939	1.01321	0.946366	0.396403	41.8869	5		0.782749	0.977329	0.699903	0.620268	0.674335	0.750917	0.139474	18.5738	5		0.793474	0.346211	b0298
	b0627	tatE	TatABCE protein translocation system subunit	1.56331	1.47506			0.944563	1.32764	0.334679	25.2085	3		1.05373	1.15224	1.44353	0.566824		1.05408	0.364568	34.5863	4		0.793949	0.353391	b0627
	b0593	entC	isochorismate synthase 1	1.55105	1.38098	0.463402	3.14014	0.966997	1.09061	0.484763	44.449	5			0.887757	0.902537	0.968809	0.705403	0.866126	0.112797	13.0232	4		0.79417	0.233116	b0593
	b1236	galU	glucose-1-phosphate uridylyltransferase	1.17164	3.06762	1.21605		1.02278	1.61952	0.968929	59.828	4		0.752188	1.68412	1.39869	1.48025	1.11622	1.28629	0.361494	28.1035	5		0.794243	0.552687	b1236
	b1796	yoaG	predicted protein	1.34026	3.70786	1.2435	1.56358	1.15604	1.80225	1.07605	59.706	5		1.41775	1.48464	1.64614	1.17994		1.43212	0.193536	13.5139	4		0.794629	0.489843	b1796
	b2705	srlD	sorbitol-6-phosphate dehydrogenase	1.51792	0.921221	1.18963	1.99291	1.0561	1.33556	0.429081	32.1275	5		0.955899	3.48984	1.50747		0.720881	1.06142	0.40377	38.0407	4		0.794737	0.642388	b2705
	b1541	ydfZ	conserved protein	0.965396	2.0583	0.845238	0.483681	0.90883	1.05229	0.592953	56.3489	5		0.809424	0.785522	1.14381	0.627648	0.816218	0.836523	0.188281	22.5076	5		0.794956	0.474502	b1541
	b1108	ycfP	conserved protein	1.24883	1.72036	1.14175	0.907578	1.29511	1.26273	0.29641	23.4738	5		1.10891	0.919256	0.967316	0.892903	1.13102	1.00388	0.109556	10.9133	5		0.79501	0.125671	b1108
	b3917	sbp	sulfate transporter subunit	1.04957	0.698866	0.421993	0.861338	1.00214	0.806782	0.254852	31.5887	5			0.776527	0.367411	0.734809	0.686905	0.641413	0.186302	29.0456	4		0.795026	0.298407	b3917
	b3084	rlmG	predicted methyltransferase small domain	1.64803	0.343391	0.398566	1.16034	0.702291	0.850524	0.551233	64.8109	5		0.842319	0.632821	0.685517	0.667433	0.554201	0.676458	0.105504	15.5965	5		0.795343	0.523698	b3084
	b0352	mhpE	4-hyroxy-2-oxovalerate/4-hydroxy-2-oxopentanoic acid aldolase, class I			2.03144	2.12964	0.902298	1.68779	0.68203	40.4095	3		1.17215	1.36415	1.70277	1.55073	0.926045	1.34317	0.306625	22.8284	5		0.795814	0.480052	b0352
	b0385	adrA	predicted diguanylate cyclase	7.19637	2.07432	0.535395		1.24717	1.28563	0.770184	59.9072	4		1.47687	0.939586	0.801952	0.928368	0.96907	1.02317	0.261572	25.5649	5		0.795852	0.333182	b0385
	b1620	malI	DNA-binding transcriptional repressor	1.93959	0.833704	0.617686	1.57579	1.21175	1.23571	0.537411	43.4902	5			1.27083	0.712774	0.960507	0.993808	0.984479	0.228386	23.1986	4		0.796694	0.383841	b1620
	b3607	cysE	serine acetyltransferase	1.15547	0.687385	0.924764	1.5565	0.833442	1.03151	0.339126	32.8766	5		0.804846	0.796191	0.737267	0.869104	0.902273	0.821936	0.0648123	7.88531	5		0.796827	0.241682	b3607
	b0560	nohB	DLP12 prophage; DNA packaging protein	0.656396	0.952781	1.65034	1.36113	1.31139	1.18641	0.386289	32.5595	5		0.42675	0.822883		1.24571	1.28684	0.945547	0.404465	42.7758	4		0.796983	0.397896	b0560
	b1494	pqqL	predicted peptidase		2.71443	1.19761	6.96816	1.23227	1.71477	0.865903	50.4967	4		2.08866	1.04663	1.23879	1.09262		1.36667	0.488246	35.7251	4		0.797001	0.310747	b1494
	b3466	yhhL	conserved inner membrane protein	0.880763	0.85599	1.02696	0.699146	0.854781	0.863528	0.116363	13.4753	5		0.674682	0.582163	0.738861	0.628971	0.816591	0.688254	0.0921755	13.3927	5		0.797026	0.031053	b3466
	b1485	ddpC	D-ala-D-ala transporter subunit	1.41794	0.454925	0.655684	1.35546	1.03554	0.983911	0.423278	43.02	5		0.848272	0.718031	0.58297	1.17678	0.59912	0.785035	0.243593	31.0296	5		0.797872	0.395574	b1485
	b2104	thiM	hydoxyethylthiazole kinase	0.506923	4.16628	0.960998	2.93659	0.732347	1.28421	1.11707	86.9849	5			1.74923	0.862211	0.712345	0.778336	1.02553	0.486347	47.424	4		0.798566	0.32346	b2104
	b2945	endA	DNA-specific endonuclease I	0.903205	1.30522	0.687301	0.421212	1.71991	1.00737	0.513152	50.9398	5		55.3578			0.627075	0.982205	0.80464	0.251115	31.2083	3		0.798754	0.426973	b2945
	b0816	yliL	predicted protein	0.874727		1.55247	1.70944	1.04631	1.29574	0.398549	30.7585	4		0.751474	0.933625	0.851139	1.13603	1.50385	1.03522	0.297698	28.7569	5		0.798946	0.322666	b0816
	b0061	araD	L-ribulose-5-phosphate 4-epimerase	4.75438	0.911737	0.647236	2.22857	1.19791	1.24636	0.692342	55.5489	5			1.47404		0.887607	0.625785	0.995811	0.434357	43.6184	3		0.798974	0.284898	b0061
	b0990	cspG	DNA-binding transcriptional regulator	1.19646	0.787332	1.91903	1.31446	0.879482	1.21935	0.44757	36.7055	5		0.809867		1.02926	1.06936	0.991372	0.974965	0.114579	11.7521	4		0.799575	0.297161	b0990
	b3481	nikR	DNA-binding transcriptional repressor, Ni-binding	1.24849			0.578406	1.20797	1.01162	0.375722	37.1406	3		1.20413	0.58438	0.624186	0.825311		0.809501	0.283433	35.0133	4		0.800202	0.483069	b3481
	b3781	trxA	thioredoxin 1	0.660805		0.721417	0.344217	0.945234	0.667918	0.248059	37.1391	4		0.564663	0.467291	0.503937	0.534651	0.602259	0.534561	0.0523265	9.7887	5		0.800338	0.363564	b3781
	b1679	sufE	sulfur acceptor protein	1.75941	0.890544	1.45123	1.74313	1.00272	1.36941	0.406889	29.7128	5		1.03864	1.16551	1.11337	1.07946	1.08589	1.09657	0.0468993	4.27689	5		0.800766	0.208801	b1679
	b3181	greA	transcription elongation factor	1.3845	2.80485	0.882055	7.22405	0.841233	1.47816	0.918313	62.1254	5		1.65731	1.59516	0.911321	0.993182	0.762352	1.18387	0.412803	34.8691	5		0.800905	0.298495	b3181
	b3693	dgoK	2-oxo-3-deoxygalactonate kinase	0.717988	0.611618	0.549418	1.53508	0.9475	0.872322	0.400299	45.889	5		0.924149	0.585061	0.455986	1.05644	0.472872	0.698901	0.274603	39.2906	5		0.801197	0.450343	b3693
	b1643	ydhI	predicted inner membrane protein	1.71233	6.55683	1.34164		1.10473	1.38624	0.306245	22.0919	4			0.855974	1.42646	1.05267		1.1117	0.289786	26.0669	3		0.801955	0.314834	b1643
	b3112			1.90978	0.973339	1.60177	1.14349	0.924249	1.31053	0.428584	32.7032	5		1.07467	1.28867	1.1682	0.964441	0.761147	1.05142	0.201425	19.1573	5		0.802291	0.269439	b3112
	b1774	ydjJ	predicted oxidoreductase, Zn-dependent and NAD(P)-binding		3.11494	0.98028		1.20314	1.09171	0.157589	14.435	3		0.832045	1.1901	0.603236	0.830019	0.92491	0.876061	0.211834	24.1803	5		0.802465	0.318735	b1774
	b1509	ydeU	conserved protein	0.945103	2.2787	1.02774	1.30791	1.00333	1.31256	0.557948	42.5085	5		0.779282	1.0653	1.28828		1.08208	1.05374	0.209183	19.8516	4		0.802813	0.380254	b1509
	b2136	yohD	conserved inner membrane protein	0.481033	1.05771	0.612238		0.762099	0.728271	0.247835	34.0307	4		0.684983	0.649418	0.656692	0.408578	0.52378	0.58469	0.11636	19.9011	5		0.802847	0.344786	b2136
	b3413	gntX	gluconate periplasmic binding protein with phosphoribosyltransferase domain, GNT I system	0.602215	1.54819		0.337959	0.898304	0.846668	0.520687	61.4984	4		0.705678		0.53912	0.741852	0.732951	0.6799	0.0951069	13.9884	4		0.80303	0.570741	b3413
	b1121	ycfZ	predicted inner membrane protein	2.4245			1.58782	1.21016	1.74083	0.621461	35.6992	3		1.20082	1.27372	1.38984		1.7332	1.39939	0.235759	16.8472	4		0.803869	0.446298	b1121
	b0609			0.489641	1.33867		0.496688	0.725951	0.762737	0.399337	52.3558	4		1.86413	0.532716	0.730913	0.531439	0.658635	0.613426	0.0984598	16.0508	5		0.804243	0.763602	b0609
	b3361	fic	stationary-phase protein, cell division	1.19267	1.64654	0.956903	1.31916	0.822666	1.18759	0.321853	27.1014	5		0.916683	1.29058	0.939733	0.937436	0.692245	0.955336	0.214282	22.43	5		0.804435	0.221356	b3361
	b1941	fliI	flagellum-specific ATP synthase	0.726046	3.70692	0.987717	1.21741	0.902799	1.50818	1.24178	82.3367	5		1.07584	1.06217	1.58614	1.04226	1.30463	1.21421	0.233634	19.2417	5		0.805083	0.628652	b1941
	b2758	ygcJ	predicted protein	2.70413	0.941013	1.77107	1.32545	1.12224	1.57278	0.704016	44.7625	5		0.975213	1.92159	1.28639	1.24703	0.902676	1.26658	0.402223	31.7566	5		0.805314	0.429042	b2758
	b1208	ispE	4-diphosphocytidyl-2-C-methylerythritol kinase	0.514829	1.21655	0.610339	0.791762	0.568798	0.740456	0.285747	38.5907	5		0.437685	0.501262	0.503826	0.679841	0.859248	0.596372	0.172383	28.9052	5		0.805412	0.368504	b1208
	b4341	yjiS	conserved protein	1.44799		1.53617	2.42484	1.09098	1.62499	0.566904	34.8865	4			1.03937	1.59229	1.00529	1.59947	1.30911	0.331444	25.3183	4		0.805607	0.381613	b4341
	b1746	astD	succinylglutamic semialdehyde dehydrogenase		8.61742	0.996699	1.33087	1.36208	1.22988	0.202545	16.4687	4		0.636696	1.01239	1.31029	1.04683	0.949686	0.991178	0.241225	24.3372	5		0.805912	0.341536	b1746
	b4365	yjjQ	predicted DNA-binding transcriptional regulator	1.81281	1.24366	0.985374	2.10847	1.81301	1.59266	0.461972	29.0063	5			1.39269	0.96049	1.50037		1.28452	0.285733	22.2444	3		0.806521	0.288631	b4365
	b4201	priB	primosomal protein N	0.235135	0.832184	0.475521	0.340874	0.6263	0.502003	0.235771	46.966	5		0.361099	0.279519	0.384206	0.44689	0.555007	0.405344	0.10291	25.3882	5		0.807454	0.435984	b4201
	b1058	yceO	predicted protein	2.15841	1.85953	1.37446	1.34725	1.06439	1.56081	0.439639	28.1674	5		1.12296	1.40284	1.46268	1.04073	1.27297	1.26044	0.17924	14.2205	5		0.807554	0.213195	b1058
	b1938	fliF	flagellar basal-body MS-ring and collar protein	2.24414	1.05399	1.42489	1.82106	1.32821	1.57446	0.464537	29.5046	5		0.895482	1.21715	1.45006	1.31026	1.485	1.27159	0.236279	18.5814	5		0.807638	0.241948	b1938
	b1861	ruvA	component of RuvABC resolvasome, regulatory subunit	0.696659	1.8532	0.677691	1.02534	0.686798	0.987938	0.505435	51.1606	5		0.892207	0.66433	0.755892	0.862539	0.817971	0.798588	0.0909371	11.3872	5		0.808338	0.453359	b1861
	b1587	ynfE	oxidoreductase subunit	1.92779	1.09267	1.51856	2.61137	1.11962	1.654	0.63453	38.3633	5		1.00004	1.43182	1.46519	1.46966	1.32055	1.33745	0.19801	14.805	5		0.808616	0.337824	b1587
	b3717	cbrC	conserved protein	0.347775		0.594846	0.419186	1.17813	0.634983	0.376683	59.3218	4		0.612194	0.41468	0.543881	0.379503	0.617255	0.513503	0.110848	21.5866	5		0.808687	0.571969	b3717
	b1553	ydfP	Qin prophage; conserved protein		8.67473	1.66127		1.27909	1.47018	0.270237	18.3812	3		1.15385	1.06717	1.51089	0.97153	1.24445	1.18958	0.206191	17.3331	5		0.809138	0.380626	b1553
	b0989	cspH	stress protein, member of the CspA-family	1.52472	0.925274	1.48759	1.8216	1.18453	1.38874	0.343559	24.7388	5		0.910505	1.49747	1.37993	0.990005	0.848278	1.12524	0.293481	26.0817	5		0.810255	0.229345	b0989
	b2089	insF	IS3 element protein InsF	0.372362	1.39331	0.874564	1.33581	0.821034	0.959415	0.418604	43.6312	5		0.962082	0.80013	0.836362	0.706935	0.581581	0.777418	0.142663	18.3509	5		0.810304	0.400361	b2089
	b3416	malQ	4-alpha-glucanotransferase (amylomaltase)	1.21223		2.02861		1.49356	1.57813	0.414705	26.2782	3			1.89949	1.25976		0.678847	1.27937	0.61056	47.7236	3		0.810684	0.526769	b3416
	b1967	hchA	Hsp31 molecular chaperone	1.29262	0.711055	1.03603	1.71227	1.07068	1.16453	0.369928	31.7663	5		0.933656	1.02353			0.876304	0.944497	0.0742102	7.85711	3		0.811055	0.259962	b1967
	b0708	phr	deoxyribodipyrimidine photolyase, FAD-binding	0.528934	1.84491	0.689608	0.669864	0.763374	0.899339	0.53536	59.5282	5		4.51593	0.666709	0.808681	0.821744	0.621631	0.729691	0.100593	13.7857	5		0.811364	0.494513	b0708
	b1973	yodA	conserved metal-binding protein			0.77959	2.02809	1.07684	1.29484	0.652171	50.367	3		0.442866	1.38872		1.01176	1.35908	1.05061	0.439822	41.8637	4		0.811379	0.610819	b1973
	b0049	apaH	diadenosine tetraphosphatase	0.769471	0.706493	0.930761	1.0762	0.8491	0.866406	0.144417	16.6685	5		0.669083	0.621309	0.817986	0.587283	0.821234	0.703379	0.110017	15.6411	5		0.811836	0.0820438	b0049
	b0716	ybgO	predicted fimbrial-like adhesin protein	1.4959	0.941888	0.905527	0.719604	1.00872	1.01433	0.289778	28.5685	5		0.762258	0.858744	0.915151	0.686067	0.896278	0.8237	0.0969239	11.7669	5		0.812065	0.223132	b0716
	b0671			0.566223	0.906294	1.1096	1.20527	1.1455	0.986577	0.260461	26.4005	5		0.763287		1.24713	0.723001	0.471302	0.80118	0.324159	40.4602	4		0.81208	0.39029	b0671
	b3134			1.43764	0.704637	0.692765	1.62707	0.966657	1.08575	0.427412	39.3654	5		0.89279			1.22076	0.533581	0.882377	0.343707	38.9524	3		0.812686	0.492397	b3134
	b4036	lamB	maltose outer membrane porin (maltoporin)			1.75943	6.05923	1.08422	1.42183	0.47745	33.58	3		1.55374		0.607447	1.30539		1.15552	0.490622	42.4588	3		0.812704	0.364677	b4036
	b3814			1.38492	1.76176		1.06369	1.50302	1.42835	0.289595	20.2748	4		0.835341	1.40538	1.52372	1.09248	0.947369	1.16086	0.29482	25.3968	5		0.812727	0.216535	b3814
	b0057			1.86009	0.925195	1.60287	1.87235	1.18572	1.48925	0.420562	28.2399	5		0.87501	1.3535	1.22209	1.01801	1.58837	1.2114	0.279719	23.0906	5		0.813429	0.258625	b0057
	b0461	ybaJ	predicted protein	2.46857	1.55053		1.79879	1.02351	1.71035	0.600005	35.0809	4		2.20368	1.03252	1.32948	1.01819	1.37382	1.39154	0.482707	34.6888	5		0.8136	0.422854	b0461
	b3379	php	predicted hydrolase	0.368001	0.936716	0.569517		0.81498	0.672304	0.253926	37.7696	4		0.7157	0.489006	0.443244	0.558295	0.529072	0.547064	0.103727	18.9607	5		0.813715	0.409131	b3379
	b0897	ycaC	predicted hydrolase	5.93333		0.802172	1.06203	1.26428	1.04283	0.23165	22.2137	4		0.976067	0.798756		0.686625	0.933022	0.848618	0.131777	15.5284	4		0.813767	0.331751	b0897
	b2709	norR	DNA-binding transcriptional activator	1.40877	1.0591	1.35425	1.72422	1.08156	1.32558	0.272584	20.5634	5		0.918664	1.04649	1.14077	1.28603	1.00942	1.08027	0.139887	12.9493	5		0.814944	0.123845	b2709
	b1141	xisE	e14 prophage; predicted excisionase	1.42985	1.18378	2.07648	2.01878	1.17572	1.57692	0.44214	28.0382	5			1.46303	1.53986	0.923734	1.2161	1.28568	0.278032	21.6253	4		0.81531	0.268845	b1141
	b1691	ydiN	predicted transporter	2.03386	1.47385	0.977125	1.84573	0.836029	1.43332	0.523746	36.5408	5		1.13312		1.11494		1.25954	1.1692	0.0787648	6.73663	3		0.815731	0.326429	b1691
	b0172	frr	ribosome recycling factor	0.704223	0.817398	0.769705	0.667912	0.843133	0.760474	0.0739761	9.72763	5		0.676011	0.505884	0.64543	0.721981	0.552953	0.620452	0.0890236	14.3482	5		0.815875	0.0276869	b0172
	b3210	arcB	hybrid sensory histidine kinase in two-component regulatory system with ArcA	1.17753	0.901914	1.88787	1.80208	1.19329	1.39254	0.430037	30.8815	5		0.78633	1.03375	1.07435	1.59979	1.18833	1.13651	0.297642	26.1891	5		0.816144	0.309329	b3210
	b3698	yidB	conserved protein	0.552804	3.74684		0.687693	0.635751	0.625416	0.0680357	10.8785	4		0.488315	0.387595	0.630285	0.330142	0.716544	0.510576	0.161964	31.7218	5		0.816379	0.335246	b3698
	b1504	ydeS	predicted fimbrial-like adhesin protein	4.86342	1.40563			1.04315	1.22439	0.256314	20.9341	3		1.02239	1.0092	0.93706	0.643873	1.38537	0.999578	0.264519	26.463	5		0.81639	0.358896	b1504
	b1412	azoR	NADH-azoreductase, FMN-dependent	1.69391	0.837458	1.72186	3.17802	1.14967	1.71618	0.898694	52.3658	5			1.45438	1.72051	1.05104	1.38061	1.40163	0.275572	19.6608	4		0.816715	0.492982	b1412
	b3122				1.33613		1.64932	0.920984	1.30214	0.365356	28.058	3		1.29939	0.86726	0.750206	1.27993	1.1219	1.06374	0.246251	23.1497	5		0.816912	0.387581	b3122
	b4207	fklB	FKBP-type peptidyl-prolyl cis-trans isomerase (rotamase)	1.08327	0.748373	0.704771	0.795361	0.960821	0.85852	0.158697	18.4849	5		0.849235	0.471029	0.666366	0.711855	0.810752	0.701848	0.148509	21.1597	5		0.817509	0.145826	b4207
	b0301	ykgB	conserved inner membrane protein	0.692856			1.3802	1.02079	1.03128	0.343792	33.3363	3		1.03397	0.669496	0.716491	0.725576	1.07	0.843106	0.192286	22.8068	5		0.817532	0.4531	b0301
	b0072	leuC	3-isopropylmalate isomerase subunit, dehydratase component	0.796148	1.11442	0.220519	1.20898	0.86441	0.840896	0.386563	45.9704	5		0.88943	0.578929	0.357106	1.01298	0.600771	0.687843	0.262289	38.132	5		0.817989	0.48747	b0072
	b3223	nanE	predicted N-acetylmannosamine-6-P epimerase	1.13405	0.69527	0.419058	1.64965	0.933972	0.9664	0.466124	48.233	5		0.945341	0.879849	0.556958	1.00311	0.569221	0.790895	0.212525	26.8714	5		0.818393	0.474712	b3223
	b3381	yhfX	predicted amino acid racemase	1.50848			1.72561	1.07244	1.43551	0.332645	23.1726	3			0.950872	1.21756	1.80901	0.722308	1.17494	0.468666	39.8886	4		0.81848	0.429068	b3381
	b0614	citX	apo-citrate lyase phosphoribosyl-dephospho-CoA transferase	1.14882	0.873293	0.840635		1.21197	1.01868	0.188976	18.5511	4		1.7098	0.704139	0.545675	0.6398	0.569563	0.833794	0.493623	59.202	5		0.818505	0.473881	b0614
	b0815	ybiP	predicted hydrolase, inner membrane			1.26283	1.35092	1.13559	1.24978	0.108257	8.66209	3			0.709694	1.34505	0.81237	1.22784	1.02374	0.309944	30.2757	4		0.819135	0.24924	b0815
	b3901	rhaM	L-rhamnose mutarotase	0.873901	0.961298	0.811248	0.981219	0.851297	0.895792	0.0727933	8.12614	5		0.511356	0.884548		0.757084	0.782427	0.733854	0.158233	21.562	4		0.819223	0.13104	b3901
	b0682	ybfN	predicted lipoprotein	1.35576	2.97763	1.04282	1.81393	1.16928	1.67189	0.786354	47.0339	5		1.26775	2.08107	1.62764	0.877552	0.998836	1.37057	0.490591	35.7947	5		0.819773	0.491851	b0682
	b0575	cusA	copper/silver efflux system, membrane component	0.819011	1.15867	1.03552	2.2751	0.926236	1.24291	0.590656	47.5221	5		0.829521	1.16807	1.06026			1.01928	0.172955	16.9682	3		0.820079	0.464182	b0575
	b1297	puuA	gamma-Glu-putrescine synthase		1.89317	1.25761	1.09395	1.04689	1.32291	0.390757	29.5377	4		0.743244	1.28109	1.32553	1.07528	1.00027	1.08508	0.23472	21.6316	5		0.820225	0.335647	b1297
	b3588	aldB	aldehyde dehydrogenase B	0.501301	0.407652	0.914404	0.714745	1.0991	0.727441	0.285768	39.284	5		0.379691	0.673497	0.511821	0.966403	0.453409	0.596964	0.233135	39.0534	5		0.820636	0.452598	b3588
	b4191	ulaR	DNA-binding transcriptional dual regulator	1.15222	0.911232	1.41121	1.6632	1.09164	1.2459	0.294126	23.6075	5		0.946652	1.23724			0.888985	1.02429	0.186659	18.2232	3		0.822132	0.241233	b4191
	b2846	yqeH	conserved protein with bipartite regulator domain	2.21887	8.42595	1.35684		1.01704	1.53091	0.619536	40.4684	4		1.14711	1.17315	1.45691			1.25906	0.171838	13.6482	3		0.822422	0.335296	b2846
	b1315	ycjS	predicted oxidoreductase, NADH-binding	1.56247		1.24601	1.34759	0.991978	1.28701	0.236836	18.402	4		0.880022	0.830999	1.47709	1.43497	0.672249	1.05907	0.370724	35.0048	5		0.822887	0.301329	b1315
	b0380	yaiZ	predicted inner membrane protein	1.12168	1.86753		1.46242	0.860896	1.32813	0.435857	32.8173	4		1.95111	0.690534	1.15585	0.574395		1.09297	0.624829	57.1679	4		0.822941	0.562285	b0380
	b3332	gspK	general secretory pathway component, cryptic	0.526762	0.538483	0.777411	1.27013	0.873026	0.797163	0.304088	38.1463	5		0.662461	1.00543	0.413057	0.702944	0.497874	0.656353	0.228238	34.7737	5		0.823361	0.433426	b3332
	b2100	yegV	predicted kinase	1.33541	0.657003	0.863321		0.855515	0.927811	0.288015	31.0424	4		0.79675	0.856674	0.634756		0.768844	0.764256	0.0937873	12.2717	4		0.823719	0.346656	b2100
	b4367	fhuF	ferric iron reductase involved in ferric hydroximate transport		0.585289	1.03322		1.55417	1.05756	0.484901	45.8509	3		0.957101	0.754546	0.942167	1.13226	0.571152	0.871445	0.214594	24.6251	5		0.824014	0.582494	b4367
	b3865	yihA	GTP-binding protein	1.35521	1.0742	1.32372	3.48192	1.10382	1.21423	0.145674	11.9972	5		1.16718	1.17695	0.73186	1.04045	0.888599	1.00101	0.190526	19.0334	5		0.824393	0.220376	b3865
	b3681			1.35607	0.478662	0.961817	1.52141	0.912971	1.04619	0.408905	39.0853	5		1.00739	0.604176	0.976663	1.10881	0.615422	0.862491	0.235834	27.3434	5		0.824414	0.415666	b3681
	b0603	ybdO	predicted DNA-binding transcriptional regulator	1.55158	1.00368	1.37487	1.54846	0.885211	1.27276	0.310958	24.4318	5		0.343318	1.42013	1.10317	0.631553	1.75027	1.04969	0.571117	54.4082	5		0.824734	0.471328	b0603
	b0916	ycaQ	conserved protein	1.78599	1.09109	1.68583	1.55164	0.987092	1.42033	0.359699	25.3251	5		0.901681	1.51514	1.60231	0.829959	1.01563	1.17294	0.35966	30.663	5		0.825826	0.308496	b0916
	b3775	ppiC	peptidyl-prolyl cis-trans isomerase C (rotamase C)	0.710838	1.45612	0.616702		0.772895	0.889138	0.383401	43.1205	4		1.06103	0.652219	0.621028	0.698934	0.638495	0.73434	0.184897	25.1786	5		0.825902	0.498518	b3775
	b0246	yafW	CP4-6 prophage; antitoxin of the YkfI-YafW toxin-antitoxin system	1.9948	0.870713	1.88819	1.7554	1.13272	1.52836	0.496895	32.5116	5		0.939243	1.62946		1.1266	1.35455	1.26246	0.297823	23.5907	4		0.826021	0.355144	b0246
	b3807	cyaY	frataxin, iron-binding and oxidizing protein	1.37497	0.882362	0.722662	1.28388	0.703616	0.993499	0.316062	31.813	5		0.893688	0.873747		0.751539	0.76544	0.821103	0.0729783	8.88783	4		0.826477	0.295962	b3807
	b2390	ypeC	conserved protein	1.20642		0.974789	1.98637	1.01581	1.29585	0.471282	36.3686	4		1.01983	1.13699	1.2476		0.879546	1.07099	0.157921	14.7453	4		0.82648	0.421078	b2390
	b1284	yciT	predicted DNA-binding transcriptional regulator	1.71369	1.15611	0.900381		1.02132	1.19788	0.359391	30.0024	4		0.682965	0.726645	0.826299	1.72458		0.990123	0.4933	49.8221	4		0.826565	0.523687	b1284
	b1273	yciN	predicted protein	2.02163	1.28191		1.41207	1.23124	1.48671	0.364653	24.5275	4		1.11508	1.26076	1.3726	1.16727		1.22893	0.113161	9.20817	4		0.826606	0.256095	b1273
	b1930	yedF	conserved protein	1.44718	1.60678		2.02298	1.51679	1.64843	0.258106	15.6577	4		1.06088	1.4831	1.47763		1.4302	1.36295	0.202776	14.8777	4		0.826819	0.135374	b1930
	b0986	gfcB	predicted outer membrane lipoprotein	1.15842		1.71762	1.37183	0.90676	1.28866	0.343381	26.6464	4			0.927364	1.09522	1.08814	1.15318	1.06598	0.0968921	9.08952	4		0.827199	0.289434	b0986
	b2802	fucI	L-fucose isomerase	0.969609			1.16369	1.00215	1.04515	0.103938	9.94484	3		0.267938	1.00807	0.857593	1.52791	0.662697	0.864843	0.462976	53.5329	5		0.827482	0.443888	b2802
	b1810	yoaC	predicted protein	1.69837	1.23831	1.16905	0.747485	1.11462	1.19357	0.34009	28.4936	5		0.862988	1.06204	1.07759	0.934225	1.00268	0.987903	0.0897813	9.08807	5		0.82769	0.253163	b1810
	b1151			21.2861			1.73604	0.946323	1.34118	0.558416	41.6361	3		1.65665	0.686116	1.14045	0.779334	1.28796	1.1101	0.393842	35.478	5		0.827704	0.409733	b1151
	b0773	ybhB	predicted kinase inhibitor	0.651707		0.938471	0.736433	1.00119	0.83195	0.164924	19.8238	4		0.571415	0.803773	0.606063	0.7037	0.759537	0.688898	0.0988298	14.3461	5		0.828052	0.190713	b0773
	b1192	ldcA	L,D-carboxypeptidase A	1.61871	0.756063	0.747192	1.37997	0.783189	1.05702	0.412716	39.0451	5		1.0459	2.47557		0.789362	0.79201	0.875756	0.147352	16.8257	4		0.828512	0.647168	b1192
	b3083	ygjN	conserved protein	1.65029	1.15517	0.896284	1.76961	1.01336	1.29694	0.390295	30.0935	5		1.03477	1.1508	1.02425	1.00508	1.1603	1.07504	0.0743392	6.91502	5		0.828905	0.275532	b3083
	b1747	astA	arginine succinyltransferase	1.31523		0.524866	1.48806	0.968132	1.07407	0.425204	39.588	4		1.04731	1.15511	0.86034	0.737458	0.653784	0.8908	0.209149	23.4787	5		0.829367	0.472651	b1747
	b0805_			0.597528		0.832109	0.376258	0.877197	0.670773	0.231477	34.5089	4		0.319972	0.631645	0.647189	0.644901	0.538452	0.556432	0.139604	25.0892	5		0.829538	0.426731	b0805_
	b2778	ygcG	predicted protein	1.65755	0.907532	0.93799	1.78382	0.922436	1.24187	0.439507	35.3908	5		1.06974	1.1246	1.15402	0.842622	0.960781	1.03035	0.128267	12.4489	5		0.829681	0.352028	b2778
	b3566	xylF	D-xylose transporter subunit	3.18143		1.152		1.13295	1.14248	0.0134704	1.17905	3			1.12518	1.11156	1.11428	0.440612	0.947909	0.338249	35.6837	4		0.829694	0.32616	b3566
	b1489	dos	cAMP phosphodiesterase, heme-regulated	1.00647		1.85486	0.493315	1.19661	1.13781	0.562802	49.4635	4		0.26865	1.06966	0.799657	1.03725	1.54548	0.944138	0.464541	49.2026	5		0.829782	0.600262	b1489
	b2800	fucA	L-fuculose-1-phosphate aldolase	1.68551	0.788034	1.65482	1.90934	1.12722	1.43298	0.460802	32.1568	5		1.19924	1.63934	1.11594	0.897597	1.09518	1.18946	0.274757	23.0994	5		0.830057	0.346257	b2800
	b1933			2.42455	0.876378	1.84884	1.45006	0.899138	1.49979	0.657442	43.8355	5			4.39457	1.32823		1.16251	1.24537	0.117183	9.40947	3		0.83036	0.53266	b1933
	b4492			1.17848	1.16099	2.30098	1.41072	1.19261	1.44876	0.487132	33.6242	5		0.486556	1.06463	1.23701	1.38083	1.8481	1.20342	0.495321	41.1593	5		0.83066	0.452511	b4492
	b0540	insE	IS3 element protein InsE		1.03591	0.736127	1.01361	1.48326	1.06723	0.309066	28.9598	4		0.575824	1.4597	0.603827	0.849874	0.943584	0.886562	0.356927	40.2596	5		0.830717	0.443217	b0540
	b3504					0.866726	0.75378	1.39611	1.00554	0.342926	34.1037	3		0.869416	0.794198	0.842553			0.835389	0.0381174	4.56283	3		0.830788	0.481137	b3504
	b3255	accB	acetyl CoA carboxylase, BCCP subunit	1.00255	1.91167	1.45649	0.830893	1.01979	1.24428	0.438794	35.265	5		1.11199		1.10461	0.884681		1.03376	0.129161	12.4943	3		0.830814	0.361738	b3255
	b2119	yehL	predicted transporter subunit: ATP-binding component of ABC superfamily			0.795584	1.25208	1.06337	1.03701	0.229389	22.1201	3		54.03	0.703448	1.03064	0.866766	0.851614	0.863116	0.133794	15.5012	5		0.83231	0.381002	b2119
	b3449	ugpQ	glycerophosphodiester phosphodiesterase, cytosolic	0.718695	1.62453	0.481386	0.583878	0.85342	0.852381	0.453821	53.2415	5		0.932274		0.497979	0.746196	0.661853	0.709575	0.180727	25.4697	4		0.832463	0.546391	b3449
	b3577	yiaM	predicted transporter	1.48748	1.10512	0.850822	2.0971	1.03673	1.31545	0.494562	37.5964	5		1.09065	0.935568	1.33343	1.02199		1.09541	0.170896	15.6011	4		0.832726	0.394958	b3577
	b2043	wcaM	predicted colanic acid biosynthesis protein	1.00905	2.42224	0.613344	1.30425	1.05124	1.28002	0.684739	53.4943	5		1.55875	0.863107	0.95387	0.890131		1.06646	0.330387	30.9797	4		0.833159	0.561926	b2043
	b1360	ydaV	Rac prophage; predicted DNA replication protein	1.68924	1.04454		1.69192	1.11139	1.38427	0.354745	25.6269	4			1.23062	0.879104	0.999252	1.50451	1.15337	0.275827	23.9148	4		0.833198	0.346026	b1360
	b0360	insC	KpLE2 phage-like element; IS2 insertion element repressor InsA	1.70435	1.12022	1.47564	2.24922	1.02259	1.51441	0.493659	32.5975	5		0.982976	1.34154	1.47707	1.1415	1.36593	1.2618	0.197332	15.6388	5		0.833201	0.334475	b0360
	b0888	trxB	thioredoxin reductase, FAD/NAD(P)-binding	0.762159	1.04664	1.02935	0.519923	0.963671	0.86435	0.223267	25.8307	5		0.672778	0.47008	0.789242	0.677832	0.992798	0.720546	0.19084	26.4855	5		0.833628	0.306218	b0888
	b0527	ybcI	conserved inner membrane protein	0.559966	1.50297		0.791135	1.06365	0.979431	0.405213	41.3723	4		1.36834	0.465149	0.594339	0.838196	0.816848	0.816574	0.345615	42.3251	5		0.833723	0.546431	b0527
	b3048	yqiI	conserved protein	0.556643	1.08812	0.748145	0.434934	1.45477	0.856521	0.415614	48.5235	5		0.970127	0.562942	0.641612	0.505106	0.892471	0.714451	0.205638	28.7826	5		0.834132	0.519508	b3048
	b0157	yadS	conserved inner membrane protein	0.932937	0.464542	0.572349	1.52227	1.02461	0.903342	0.418556	46.3342	5		0.696256	0.893219	0.882555	0.673782	0.621888	0.75354	0.125629	16.6718	5		0.834169	0.479968	b0157
	b2002	yeeS	CP4-44 prophage; predicted DNA repair protein	1.52688	0.471836	0.908814	1.17116	0.990579	1.01386	0.385132	37.9868	5		1.0248	0.887661	0.813461	0.953117	0.550031	0.845813	0.182917	21.6261	5		0.834254	0.413665	b2002
	b0846	ybjK	predicted DNA-binding transcriptional regulator	1.89702	0.667867	0.616653	1.6297	0.981233	1.1585	0.577319	49.8335	5		1.04207	0.741868	1.43294	0.848166	0.768494	0.966707	0.285897	29.5743	5		0.834451	0.530969	b0846
	b1420	mokB	regulatory peptide	0.106258	0.836758	0.581246	0.322136	0.56919	0.483118	0.278405	57.6268	5		0.330286	0.324384	0.387893	0.344057	0.62912	0.403148	0.128744	31.9347	5		0.834472	0.582463	b1420
	b2083			1.77395	1.0676	1.60137	1.26029	0.935688	1.32778	0.353519	26.6249	5		0.983776	1.20667	1.46325	0.881342	1.0057	1.10815	0.230872	20.8341	5		0.834588	0.283489	b2083
	b3237	argR	DNA-binding transcriptional dual regulator, L-arginine-binding	0.723442	0.690109	1.02001	1.00679	1.05837	0.899743	0.177562	19.7347	5		0.795773	0.57349	0.964357	0.75467	0.668845	0.751427	0.146456	19.4904	5		0.835157	0.188916	b3237
	b3348	slyX	conserved protein	1.51169	1.42482	1.38802	1.8448	0.879924	1.40985	0.346796	24.5981	5		1.12649	1.24402	1.41204	0.928806		1.17784	0.203211	17.2529	4		0.835437	0.253596	b3348
	b1193	emtA	lytic murein endotransglycosylase E	0.936143	0.872648	0.776943	0.697008	0.981534	0.852855	0.116123	13.6157	5		0.684183	0.801454	0.815636	0.696975	0.565143	0.712678	0.10162	14.2589	5		0.835638	0.0773244	b1193
	b0149	mrcB	fused glycosyl transferase and transpeptidase			1.11023	4.41984	1.08763	1.09893	0.0159854	1.45463	3		5.55619	0.850767	1.04263	0.623686	1.15999	0.919267	0.234681	25.5291	5		0.836512	0.814472	b0149
	b2717	hycI	protease involved in processing C-terminal end of HycE	1.57696	0.985889	1.06027	0.958258	1.1831	1.1529	0.252535	21.9044	5		0.854889	1.18392	1.0909	0.694808	1.00022	0.964948	0.193744	20.0782	5		0.836978	0.225594	b2717
	b0378	yaiW	predicted DNA-binding transcriptional regulator	0.595314	1.85539	1.00046	0.852475	0.841556	1.02904	0.484283	47.0617	5		1.00054	0.805166			0.778413	0.861372	0.12126	14.0775	3		0.837063	0.495909	b0378
	b1219	ychN	conserved protein		1.20976		1.5373	1.25734	1.3348	0.176982	13.2591	3		0.946599	1.05664	1.40985	1.06029		1.11835	0.201372	18.0062	4		0.837839	0.194449	b1219
	b3815					0.487692	0.597805	1.02225	0.702581	0.282261	40.1748	3		0.867678	0.480101	0.411014	0.479132	0.707131	0.589011	0.19185	32.5715	5		0.838353	0.579275	b3815
	b0538			4.20721	0.789262	1.19901	1.57476	1.25557	1.20465	0.322568	26.7769	5			1.65342	0.883527	0.493955		1.0103	0.590039	58.4022	3		0.838669	0.302252	b0538
	b1549	ydfO	Qin prophage; predicted protein		1.61813	1.39984	53.1809	1.49473	1.50423	0.10945	7.27614	4				1.08666	0.988847	1.70964	1.26172	0.390981	30.9881	3		0.838776	0.383337	b1549
	b4274			1.09016		1.03597	1.13477	1.30991	1.1427	0.118565	10.3759	4		0.95294		1.07765		0.845059	0.958549	0.116396	12.143	3		0.838843	0.101212	b4274
	b2168	fruK	fructose-1-phosphate kinase	0.876381	0.62524	0.679829	0.506141	0.694305	0.676379	0.134099	19.826	5		0.57809		0.620826		0.503436	0.567451	0.0594138	10.4703	3		0.838954	0.167613	b2168
	b0144	yadB	glutamyl-Q tRNA(Asp) synthetase	0.802758	1.11517		0.89904	1.00276	0.954932	0.134468	14.0814	4		0.501953	0.697917	0.925078	0.831548	1.05088	0.801476	0.211439	26.3811	5		0.839301	0.228934	b0144
	b1959	yedA	predicted inner membrane protein	1.50701	0.960651	1.04705	0.819877	0.750588	1.01704	0.2975	29.2517	5			0.549535		0.63696	1.37478	0.853757	0.453329	53.0981	3		0.839457	0.616159	b1959
	b2767	ygcO	predicted 4Fe-4S cluster-containing protein	0.694354	1.07074	0.565991	0.768074	1.28623	0.877077	0.294514	33.579	5		1.00858	0.643944	0.591159		0.70155	0.736309	0.187031	25.4011	4		0.839503	0.413385	b2767
	b1857	znuA	zinc transporter subunit: periplasmic-binding component of ABC superfamily	1.55682			0.677887	1.70114	1.31195	0.553834	42.2146	3		1.06821	0.949718	0.997892	1.05061	1.44103	1.10149	0.195415	17.7409	5		0.839584	0.582821	b1857
	b3964	yijD	conserved inner membrane protein	0.357529	0.6872	1.26804	0.410503	1.12748	0.770151	0.412936	53.6175	5		0.252351	0.540423	0.884956	0.553944	1.00164	0.646663	0.299232	46.2733	5		0.839657	0.604323	b3964
	b1560	ydfU	Qin prophage; predicted protein	2.29193	4.42885	0.90239	1.24321	0.965857	1.35084	0.644605	47.7187	5		1.86836	0.826754	0.898161	0.944356		1.13441	0.491689	43.3432	4		0.839777	0.292588	b1560
	b0302				1.88724	1.418		1.12585	1.47703	0.384114	26.0058	3		1.25145	1.04626	1.49086	0.842437	1.57337	1.24088	0.304049	24.5028	5		0.840116	0.421543	b0302
	b0391	yaiE	conserved protein	1.8786	1.109	1.61916	1.28841	0.99841	1.37872	0.365114	26.4822	5		0.948988	1.6543	1.10729	1.08181	1.00121	1.15872	0.284147	24.5225	5		0.840435	0.320503	b0391
	b0787	ybhM	conserved inner membrane protein	1.65499	14.1723	1.1656	0.870202	1.13118	1.20549	0.327404	27.1593	5		0.851222	0.802724		1.22837	1.17563	1.01449	0.218491	21.537	4		0.841554	0.344124	b0787
	b3449	ugpQ	glycerophosphodiester phosphodiesterase, cytosolic	0.418688	0.513767	0.976669	0.459245	1.16979	0.707632	0.342323	48.3759	5		0.293055	0.523266	0.626143	0.76607	0.769954	0.595698	0.198216	33.2745	5		0.841819	0.548794	b3449
	b2737	ygbK	conserved protein	0.562134	0.563115	0.940338	1.01189	1.07533	0.830561	0.249211	30.0051	5		0.48635	0.757498		0.868884	0.684388	0.69928	0.160951	23.0167	4		0.841936	0.372308	b2737
	b1706	ydiU	conserved protein	1.11957	0.697842	1.08361	1.6117	0.631555	1.02886	0.393178	38.2151	5		1.03997	0.73953	1.02693	0.857395	0.670129	0.866791	0.16628	19.1834	5		0.842481	0.43204	b1706
	b0581	ybdK	gamma-glutamyl:cysteine ligase	0.938218	0.890349	0.500455	1.54177	1.0998	0.994118	0.377055	37.9286	5		0.99236	0.908885	1.00508	0.736332	0.548105	0.838152	0.194386	23.1922	5		0.843111	0.44252	b0581
	b2849	yqeK	predicted protein	1.83713			1.17883	0.882581	1.29951	0.488582	37.5973	3			1.21421	1.27002	0.802863		1.0957	0.255133	23.285	3		0.843161	0.567219	b2849
	b3883	yihV	predicted sugar kinase	0.286934	0.495095	0.811734		1.78839	0.531254	0.264262	49.7431	4		0.222442	0.379039	0.463124		0.728248	0.448213	0.21166	47.223	4		0.843688	0.324606	b3883
	b0539				1.11361	1.76112	1.78529	0.895366	1.38885	0.452782	32.6013	4		0.871242	1.22819	0.9798	0.933859	1.85214	1.17305	0.403067	34.3607	5		0.844619	0.48334	b0539
	b3185	rpmA	50S ribosomal subunit protein L27	0.890991	18.0234	0.823121	0.893691	0.736103	0.835976	0.0741566	8.87066	5		0.651154	0.844839	0.599345	0.778749	0.656428	0.706103	0.101746	14.4096	5		0.844645	0.358019	b3185
	b3242	aaeX	membrane protein of efflux system	1.95335	0.999183	1.04221	1.39963	1.05036	1.28895	0.404799	31.4054	5		1.01326	1.00996	1.23102	1.10916	1.08144	1.08897	0.0903005	8.29229	5		0.844852	0.336523	b3242
	b0832	gsiD	predicted peptide transporter subunit: membrane component of ABC superfamily	0.929325	0.526396	0.616533	0.810923	0.711371	0.71891	0.158383	22.031	5		0.62367	0.461332	0.49983	0.902732	0.550985	0.60771	0.175766	28.9227	5		0.845322	0.324314	b0832
	b1705	ydiE	conserved protein	1.53544		1.58739	1.49277	1.23078	1.46159	0.158668	10.8558	4		1.03899	1.35507	1.50725	1.12467	1.15311	1.23582	0.19094	15.4505	5		0.845526	0.0941442	b1705
	b3597	yibH	predicted protein	1.22772	1.0863	2.15661	2.82865	1.3429	1.72843	0.742546	42.9606	5		1.28517	3.77882	1.63917			1.46217	0.250317	17.1196	3		0.845951	0.5958	b3597
	b2586	yfiM	predicted protein	0.972381	0.725311	0.593424	1.2255	1.15333	0.93399	0.271152	29.0316	5		0.977366	0.758585	0.870277	0.629634	0.715042	0.790181	0.135898	17.1983	5		0.846027	0.330571	b2586
	b3310	rplN	50S ribosomal subunit protein L14	1.43534		1.11535	2.58098	1.46207	1.64843	0.641342	38.9061	4		1.01298	1.56044	1.51218	1.33173	1.55623	1.39471	0.232937	16.7015	5		0.846083	0.49751	b3310
	b3004			0.766393	0.867734			1.58011	1.07141	0.44345	41.3893	3		5.06843	0.82006	0.764497	0.707655	1.33444	0.906662	0.288851	31.8587	5		0.84623	0.48343	b3004
	b2446	yffO	CPZ-55 prophage; predicted protein	1.27015		1.17651	1.95788	1.22067	1.4063	0.369701	26.2888	4		1.57843	1.08649			0.905257	1.19006	0.348333	29.2703	3		0.846231	0.467302	b2446
	b3338	chiA	periplasmic endochitinase		1.66406	1.38633	0.8337	0.984228	1.21708	0.378434	31.0936	4		0.653666	1.47845	1.25851	0.970359	0.789294	1.03006	0.337804	32.7947	5		0.846334	0.468433	b3338
	b4357	yjjM	predicted DNA-binding transcriptional regulator	1.48658	0.483761		1.1217	1.02407	1.02903	0.414442	40.2751	4		0.85165	0.957254	0.701601	1.07767	0.768585	0.871352	0.14976	17.187	5		0.846772	0.51294	b4357
	b0065	yabI	conserved inner membrane protein	1.56862	0.533202	1.03588	1.58386	1.10857	1.16603	0.435137	37.3179	5		0.87961	0.783726	1.26908	0.99229	1.0122	0.987383	0.182405	18.4736	5		0.846791	0.433336	b0065
	b3157	yhbT	predicted lipid carrier protein	0.587127	0.603393	0.382365	0.673136	0.763828	0.60197	0.141166	23.4507	5			0.432689	0.623323		0.473852	0.509955	0.100314	19.6711	3		0.847143	0.326792	b3157
	b0254	perR	CP4-6 prophage; predicted DNA-binding transcriptional regulator	1.82754	1.49702	1.96108	2.15862	1.22961	1.73477	0.37121	21.3982	5			1.32131	1.70634	1.38168		1.46977	0.20708	14.0893	3		0.847242	0.242823	b0254
	b0704	ybfC	predicted protein			1.68186	5.02623	1.09155	1.3867	0.417413	30.1011	3		0.988732	1.0509	1.25583	1.13093	1.45154	1.17559	0.183744	15.63	5		0.847757	0.364898	b0704
	b3039	ygiD	predicted dioxygenase	1.46087		1.07682	1.4978	0.849753	1.22131	0.312391	25.5783	4		1.0829	1.47125	1.22392	0.593926	0.806183	1.03564	0.344673	33.2813	5		0.847971	0.42614	b3039
	b1540	ydfH	predicted DNA-binding transcriptional regulator	0.93189	0.784217	0.763854	0.729039	0.972776	0.836355	0.108661	12.9923	5		0.851277	0.464353	0.808042	0.637629	0.78489	0.709238	0.158711	22.3777	5		0.84801	0.18255	b1540
	b4195	ulaC	L-ascorbate-specific enzyme IIA component of PTS	1.88373	1.15197	1.47745	1.60764	0.993865	1.42293	0.355998	25.0187	5		1.27462		1.0599	1.14035	1.35515	1.20751	0.132411	10.9657	4		0.848606	0.26394	b4195
	b1328	ycjZ	predicted DNA-binding transcriptional regulator	0.935081	1.22404	1.1739	1.52759	0.882533	1.14863	0.258043	22.4653	5		0.804605	1.01481	0.996978	0.690993	1.37091	0.975659	0.259088	26.5552	5		0.849413	0.321081	b1328
	b0309			2.06712	0.687117	1.35925	1.13944	0.748428	1.20027	0.558543	46.5348	5		0.909512	0.910616	1.20138	1.0986	0.97781	1.01958	0.127504	12.5055	5		0.849462	0.51611	b0309
	b3133	agaV	N-acetylgalactosamine-specific enzyme IIB component of PTS		1.07369	0.968816	0.718529	1.28206	1.01078	0.234324	23.1826	4		0.319661	1.28854	1.15694	0.740392	0.787564	0.85862	0.381881	44.4761	5		0.849467	0.48753	b3133
	b2027	cld	regulator of length of O-antigen component of lipopolysaccharide chains	0.547278	0.684025	0.598704	0.369647	0.668814	0.573694	0.126668	22.0794	5		0.554303	0.314988	0.453578	0.44504	0.670974	0.487777	0.133078	27.2826	5		0.850239	0.326345	b2027
	b4309	yjhS	conserved protein	0.934901		0.653629	0.902839	1.07879	0.89254	0.1767	19.7974	4		0.82039	0.894775	0.887011	0.424174	0.768202	0.758911	0.194154	25.5833	5		0.850282	0.317362	b4309
	b2250	yfaZ	predicted outer membrane porin protein	1.02561	1.23677	0.61602	0.787372	1.18502	0.97016	0.264173	27.2299	5		0.94795	0.742085	0.82076	0.728711	0.885689	0.825039	0.0934937	11.332	5		0.850416	0.299308	b2250
	b0336	codB	cytosine transporter	1.14626	1.00987	1.10425	1.39146	0.990788	1.12853	0.16054	14.2256	5		0.928127	0.763569	0.730005	1.41996		0.960417	0.318363	33.1484	4		0.851036	0.387628	b0336
	b2290	yfbQ	predicted aminotransferase	0.591933	0.548338	0.790024	0.412241	1.28085	0.724677	0.339091	46.792	5		0.539706	0.572408	0.442248	0.544133	0.985387	0.616776	0.211849	34.3477	5		0.851105	0.566045	b2290
	b4102	phnF	predicted DNA-binding transcriptional regulator of phosphonate uptake and biodegradation	0.306019	1.20582	0.447838	0.965347	0.823661	0.749737	0.370133	49.3684	5		0.339711	0.789273	0.830634	0.670353	0.56058	0.63811	0.197489	30.9491	5		0.851112	0.573233	b4102
	b0215	dnaQ	DNA polymerase III epsilon subunit	0.601637	0.73074	0.520785	0.461405	0.66006	0.594925	0.107305	18.0367	5		0.560704	0.539533	0.406291	0.483364	0.542013	0.506381	0.0629833	12.4379	5		0.851167	0.15911	b0215
	b1976	mtfA	conserved protein	0.377589	0.626674	0.616042	0.207014	0.743285	0.514121	0.217099	42.2273	5		0.308508	0.2687	0.432828	0.488667	0.689464	0.437634	0.166777	38.1088	5		0.851227	0.550666	b1976
	b1352	kilR	Rac prophage; inhibitor of ftsZ, killing protein			1.596	1.20601	0.912151	1.23805	0.343046	27.7085	3		0.793867	1.60951	1.04664	0.765467		1.05387	0.391392	37.1386	4		0.851232	0.538856	b1352
	b0383	phoA	bacterial alkaline phosphatase	1.64168	0.554031	0.92616	1.20856	0.962052	1.0585	0.401223	37.905	5		1.10953	0.914424		0.905438	0.675316	0.901178	0.177595	19.707	4		0.851377	0.463181	b0383
	b1626	ydgK	conserved inner membrane protein	1.10083	0.455211	0.73955	0.906183	0.651138	0.770582	0.246039	31.9289	5		0.65204	0.335206	0.90994		0.728736	0.65648	0.23993	36.548	4		0.851928	0.507136	b1626
	b4063	soxR	DNA-binding transcriptional dual regulator, Fe-S center for redox-sensing	1.83504	1.31155	1.58315	2.14038	0.986911	1.57141	0.447922	28.5045	5		1.26663	1.52386	1.30386	1.27612	1.3235	1.33879	0.105876	7.90835	5		0.851971	0.315696	b4063
	b2359	yfdP	CPS-53 (KpLE1) prophage; predicted protein	2.31246	1.06154	1.80384	1.30834	0.924498	1.48214	0.572495	38.6263	5		0.967489	1.99476	1.28045	1.03314	1.04195	1.26356	0.425675	33.6887	5		0.852524	0.514192	b2359
	b0407	yajC	SecYEG protein translocase auxillary subunit	1.44639	1.95195	0.948739	0.655151	1.16111	1.23267	0.495558	40.202	5		0.95915	1.20965	0.82064	1.26953	0.999778	1.05175	0.185102	17.5994	5		0.853231	0.478337	b0407
	b2719	hycG	hydrogenase 3 and formate hydrogenase complex, HycG subunit	1.09544	0.697133		1.03134	1.03289	0.964202	0.180532	18.7235	4		1.07096	0.538869	1.09488	0.894779	0.515165	0.822931	0.281091	34.1573	5		0.853483	0.392609	b2719
	b3837			0.464898	0.798951		0.390547	0.617005	0.56785	0.180609	31.8058	4		0.514655	0.389916	0.462246	0.425276	0.631915	0.484802	0.0943251	19.4564	5		0.853749	0.44852	b3837
	b2358			2.42661	1.14251	1.3023	4.43406	1.05418	1.4814	0.638453	43.0979	5		1.19191	1.21947	1.30638		1.34316	1.26523	0.0712629	5.63239	4		0.854078	0.276396	b2358
	b3446	yrhB	predicted protein		1.06931	1.04228	2.01347	0.907672	1.25818	0.508461	40.4124	4		1.1849	1.18734		0.851992		1.07474	0.192913	17.9497	3		0.854204	0.544472	b3446
	b2216	rcsD	phosphotransfer intermediate protein in two-component regulatory system with RcsBC	1.42279		2.20012	1.10833	1.12008	1.46283	0.512625	35.0434	4		0.364428	1.00183	1.40689	1.05862	2.42409	1.25117	0.755903	60.4156	5		0.85531	0.633378	b2216
	b2734	pphB	serine/threonine-specific protein phosphatase 2	0.679482	0.533856	2.04445	1.01391	0.92663	1.03967	0.593422	57.0782	5		0.56515		1.10228	0.824561	1.06593	0.88948	0.248879	27.9803	4		0.855545	0.627984	b2734
	b2841	araE	arabinose transporter	1.50157	2.3993	1.29923	7.33043	0.781414	1.49538	0.674619	45.1136	5		1.12398	2.14305	1.16272		0.688723	1.27962	0.614429	48.0165	4		0.855716	0.31872	b2841
	b1362			0.124096	0.949785	1.90292	0.199023	3.00463	1.23609	1.22131	98.8044	5		1.16363	0.908351	1.10357		2.92785	1.05852	0.13347	12.6092	4		0.856342	0.699716	b1362
	b1657	ydhP	predicted transporter			0.613486	1.68729	1.16944	1.15674	0.537013	46.4249	3		1.54501	0.82777	0.878228	0.907713	0.794251	0.990595	0.313024	31.5996	5		0.85637	0.660488	b1657
	b1971	yedY	predicted reductase	1.87966	0.505895	1.28842	1.43916	0.85555	1.19374	0.530845	44.4691	5		0.796665	1.33559	1.15223	1.14738	0.682579	1.02289	0.272487	26.639	5		0.85688	0.545787	b1971
	b2166	yeiC	predicted kinase	1.93862		1.6815	1.75822	1.00135	1.59492	0.410127	25.7145	4		0.901456	2.53551	1.13014	1.24942	1.01779	1.36686	0.665961	48.7219	5		0.857008	0.54917	b2166
	b1137	ymfD	e14 prophage; predicted SAM-dependent methyltransferase	1.88901	1.14613	1.61816	1.46466	0.781182	1.37983	0.429028	31.0928	5		0.88282	1.21061		1.35946	1.27875	1.18291	0.209105	17.6772	4		0.857287	0.402084	b1137
	b2886	ygfS	predicted oxidoreductase, 4Fe-4S ferredoxin-type subunit	0.481633	1.57245	0.676297	0.513293	0.696107	0.787956	0.448778	56.9548	5		0.515196	0.782107	0.699872	0.752917	0.629078	0.675834	0.10701	15.8337	5		0.857705	0.612912	b2886
	b3540	dppF	dipeptide transporter	0.488711	0.360562	0.474422	1.32118	0.830487	0.695072	0.391636	56.3446	5			0.50972	0.596504	0.819113	0.4595	0.596209	0.159014	26.6708	4		0.857766	0.627224	b3540
	b1742	ves	conserved protein	1.91755	0.708549	0.520749	1.52595	0.835347	1.10163	0.593427	53.8681	5		0.887744	1.1735	1.11391	0.886774	0.664473	0.945281	0.203782	21.5578	5		0.858075	0.60174	b1742
	b1431	ydcL	predicted lipoprotein	1.66568	0.851813	1.18748	1.37595	1.19603	1.25539	0.297439	23.693	5		0.937953	1.26947	1.43445	0.978102	0.767169	1.07743	0.269222	24.9875	5		0.858242	0.350575	b1431
	b1978	yeeJ	adhesin	0.366437	1.20575	1.26591	0.24485	1.40241	0.897071	0.546273	60.8952	5			0.645106	1.14612	0.551917	0.737535	0.770171	0.261841	33.9978	4		0.858539	0.663253	b1978
	b2712	hypF	carbamoyl phosphate phosphatase and maturation protein for [NiFe] hydrogenases	0.401558	1.06829	1.40036	1.17641	1.03352	1.01603	0.372171	36.63	5		0.346858	1.04234	0.882473	1.2698	0.820073	0.872308	0.341262	39.1217	5		0.858548	0.5424	b2712
	b3141	agaI	galactosamine-6-phosphate isomerase	1.2984	0.673658	0.702038	0.59667	1.25487	0.905126	0.341668	37.7482	5		0.751495	1.09848	0.651751	0.637096	0.748205	0.777406	0.187144	24.0729	5		0.858893	0.490268	b3141
	b2495	yfgD	predicted oxidoreductase	1.69811		0.770009	0.74476	0.871896	1.02119	0.454612	44.5177	4		1.24621	0.895532	0.849191	0.621146	0.773595	0.877136	0.231078	26.3446	5		0.858931	0.593284	b2495
	b1492	gadC	predicted glutamate:gamma-aminobutyric acid antiporter	1.67464	0.670707	0.752627	1.68567	1.02705	1.16214	0.490968	42.247	5			0.860409		0.992841	1.14313	0.998793	0.141454	14.1625	3		0.859444	0.516762	b1492
	b2067	yegE	predicted diguanylate cyclase, GGDEF domain signalling protein	0.944564	0.71086		0.358652	0.949534	0.740902	0.278102	37.5356	4		0.350728	0.718019	0.633752	0.76029	0.722896	0.637137	0.166662	26.1579	5		0.859947	0.541674	b2067
	b3395	hofM	predicted pilus assembly protein	0.568973	0.667051	0.532674	1.26626	0.746791	0.756349	0.297159	39.2885	5		7.23872	0.555686	0.707451	0.689217		0.650785	0.0828608	12.7324	4		0.860429	0.418983	b3395
	b0269	yagF	CP4-6 prophage; predicted dehydratase	1.68908	0.793499	1.95054	1.64137	0.98751	1.4124	0.495515	35.0832	5		1.04831	1.39391	1.08642	1.0172	1.53094	1.21536	0.231988	19.0881	5		0.860491	0.453071	b0269
	b0866	ybjQ	conserved protein		1.63614	1.19386	7.46857	1.1644	1.33147	0.264265	19.8476	4		0.999191			1.15803	1.28007	1.14576	0.14084	12.2922	3		0.860528	0.34509	b0866
	b2386	fryC	predicted enzyme IIC component of PTS	2.02493	1.41044		4.99386	1.17744	1.5376	0.437818	28.4741	4		1.00041	1.73699	1.27245	1.15477	1.4513	1.32318	0.284062	21.4681	5		0.86055	0.309866	b2386
	b0457	ylaB	conserved inner membrane protein	0.68111	0.614121	0.738915	0.616449	0.970126	0.724144	0.146868	20.2816	5		0.595991	0.627575	0.550436	0.692053	0.65025	0.623261	0.0536809	8.6129	5		0.860686	0.208156	b0457
	b0317	yahC	predicted inner membrane protein	1.02347	0.869504	0.68047	1.19528	0.947076	0.943161	0.190041	20.1494	5		0.832204	0.854676	0.935897	0.916948	0.519263	0.811798	0.169033	20.8221	5		0.86072	0.281892	b0317
	b0048	folA	dihydrofolate reductase	0.987959	0.667276	1.02898	0.387876	1.80758	0.975935	0.532842	54.5981	5		0.624698	0.725165	0.83091	0.88174	1.14082	0.840667	0.194846	23.1776	5		0.861397	0.616562	b0048
	b2662	gabT	4-aminobutyrate aminotransferase, PLP-dependent	1.77242	2.33463	1.39014	1.87572	0.92685	1.65995	0.530241	31.9432	5		1.00943		2.09061		1.19092	1.43032	0.578985	40.4795	3		0.861663	0.605095	b2662
	b3896	yiiG	conserved protein	0.985914	3.17181	1.20012		1.18595	1.124	0.119792	10.6577	4		0.655483	1.36965		0.975303	0.880379	0.970203	0.29816	30.7317	4		0.863173	0.290513	b3896
	b2110	yehC	predicted periplasmic pilin chaperone		1.68159	1.40086	1.03529	0.872528	1.24757	0.364049	29.1807	4		1.06432		1.13655	1.03114		1.07734	0.0538964	5.00274	3		0.86355	0.421202	b2110
	b2202	napC	nitrate reductase, cytochrome c-type, periplasmic	0.530966	0.969944	0.425073	0.37657	0.855152	0.631541	0.265647	42.0633	5		0.801527	0.478258	0.431467	0.385028	0.6327	0.545796	0.170609	31.2587	5		0.864229	0.56332	b2202
	b1454	yncG	predicted enzyme	2.00102	0.448502	1.18628	0.982342	0.769844	1.0776	0.583966	54.1914	5		0.863623	0.821438	1.2366	1.03256	0.70225	0.931295	0.207712	22.3036	5		0.864232	0.620219	b1454
	b3126	garL	alpha-dehydro-beta-deoxy-D-glucarate aldolase	1.09053		0.493857	0.757472	0.905748	0.811901	0.252028	31.0417	4			0.800761	0.555495	0.900063	0.550655	0.701743	0.1764	25.1375	4		0.864322	0.503816	b3126
	b0626			0.72295	0.95854	0.890647	1.40019	0.937276	0.98192	0.251437	25.6067	5		0.918269	0.697297	0.660494	0.962491	1.00591	0.848892	0.158782	18.7046	5		0.864523	0.351662	b0626
	b4404			0.919486		0.942959	1.25676	0.939035	1.01456	0.161791	15.9469	4		1.11663	1.04319	0.725365	0.797236	0.703337	0.87715	0.1901	21.6725	5		0.864563	0.280276	b4404
	b1635	gst	glutathionine S-transferase	0.6753	1.57949	0.844768	0.454021	0.948367	0.90039	0.423228	47.005	5		0.739746	0.674133	0.752911	0.947091		0.77847	0.117576	15.1034	4		0.864592	0.566718	b1635
	b2541	hcaB	2,3-dihydroxy-2,3-dihydrophenylpropionate dehydrogenase	0.941437		0.325558		0.834817	0.700604	0.329145	46.9802	3			0.617906	0.388617	0.706693	0.710696	0.605978	0.151104	24.9356	4		0.864936	0.679016	b2541
	b3925	glpX	fructose 1,6-bisphosphatase II	0.517682	0.508709	0.49052	1.15223	0.810256	0.69588	0.287358	41.2942	5		0.722855		0.589799	0.528505	0.566663	0.601956	0.0844689	14.0324	4		0.865028	0.519409	b3925
	b3838	tatB	TatABCE protein translocation system subunit	0.426771	0.426697	0.803644	0.360257	0.510729	0.505619	0.174944	34.5999	5		0.491599	0.369969	0.404826	0.385149	0.535498	0.437408	0.072282	16.5251	5		0.865094	0.454821	b3838
	b0224	yafK	conserved protein	0.635351	0.787648	0.765789	0.515696	0.830192	0.706935	0.129294	18.2893	5		0.627434	0.466407	0.559229	0.634248	0.771923	0.611848	0.112128	18.3261	5		0.865494	0.249962	b0224
	b3480	nikE	nickel transporter subunit	0.489142	0.747494	0.595089	0.537549	1.0308	0.680014	0.218828	32.1799	5		0.475497	0.619379	0.390762		0.870899	0.589134	0.210215	35.682	4		0.866355	0.547875	b3480
	b0328	yahN	neutral amino-acid efflux system	0.631407	1.01984	1.43957	0.907038	1.13575	1.02672	0.29706	28.9329	5		0.33593	0.970943	1.31985	0.899516	0.921392	0.889526	0.353338	39.722	5		0.866376	0.525552	b0328
	b2257	arnT	4-amino-4-deoxy-L-arabinose transferase	0.86447	0.712432	0.626666	1.18022	0.983849	0.873526	0.219774	25.1594	5		0.731543	0.618837	0.803377	0.735039	0.895859	0.756931	0.102044	13.4813	5		0.866523	0.325742	b2257
	b3680	yidL	predicted DNA-binding transcriptional regulator	0.505738		1.59092	1.2794	1.05246	1.10713	0.457673	41.3387	4		0.398066	0.899928	1.15245	1.06406	1.2826	0.959422	0.343263	35.778	5		0.866586	0.612994	b3680
	b0459	maa	maltose O-acetyltransferase	2.0459	1.52736	1.01547	0.830829	1.0196	1.28783	0.496747	38.5723	5		1.01189	9.05806	1.47661	0.912072	1.06408	1.11616	0.248434	22.2579	5		0.866697	0.425969	b0459
	b2336	yfcS	predicted periplasmic pilus chaperone	7.04687	1.00421	1.51217	1.03949	1.15466	1.17763	0.232093	19.7084	5		0.669886	1.48281		0.911347		1.02135	0.417476	40.875	3		0.867289	0.326054	b2336
	b1369			2.03182		1.04476	2.09984	1.07972	1.56404	0.580261	37.1002	4		2.18412	1.21888	1.55414	0.768146	1.0585	1.35676	0.542662	39.9969	5		0.867473	0.602446	b1369
	b2715	ascF	fused cellobiose/arbutin/salicin-specific PTS enzymes: IIB component/IC component	0.678348		0.215902	1.08238	0.835384	0.703003	0.364841	51.8975	4		0.446114	0.829878	0.481764	0.651881	0.639838	0.609895	0.153536	25.1742	5		0.867556	0.658707	b2715
	b0777	bioC	predicted methltransferase, enzyme of biotin synthesis	0.645775	0.422921	0.920476	0.75903	1.38368	0.826377	0.360338	43.6046	5		0.248386	1.14044	0.516721	0.912622	0.766704	0.716974	0.34632	48.303	5		0.867611	0.63766	b0777
	b0046	kefF	flavoprotein subunit for the KefC potassium efflux system	1.84076	0.592637	1.35165	1.50698	1.08445	1.2753	0.469496	36.8147	5		0.885075	1.07978	1.4033	1.05789		1.10651	0.216174	19.5365	4		0.867651	0.502276	b0046
	b2877	ygfJ	conserved protein	1.61845	0.941462	0.751098	1.34765	0.959759	1.12368	0.351371	31.2696	5		1.03439	0.659598	1.46901	0.845972	0.867095	0.975214	0.306327	31.4112	5		0.867873	0.496958	b2877
	b1344	ttcA	predicted C32 tRNA thiolase	3.12437	1.24899	0.999596	1.76976	1.07606	1.64375	0.880504	53.5667	5		1.20776	1.27323	1.53643	0.890779	2.22465	1.42657	0.501861	35.1795	5		0.867874	0.647871	b1344
	b0936	ssuA	alkanesulfonate transporter subunit	1.5879		0.291652	1.57423	1.09603	1.13745	0.608488	53.4957	4		1.48586	0.88026	0.669105	1.2835	0.617516	0.987249	0.38267	38.7612	5		0.867948	0.685482	b0936
	b0492	ybbN	predicted thioredoxin domain-containing protein	1.67289		2.21416	1.00591	1.06918	1.49053	0.568413	38.1349	4		0.940688	1.25638	1.52773	1.35255	1.39387	1.29424	0.220384	17.028	5		0.86831	0.552128	b0492
	b3414	gntY	predicted gluconate transport associated protein	0.660416	1.60978	0.619464	0.472194	0.888614	0.850093	0.450161	52.9543	5		0.711847	0.833062	0.745057	0.684614	0.71751	0.738418	0.0570952	7.7321	5		0.868632	0.610527	b3414
	b1530	marR	DNA-binding transcriptional repressor of multiple antibiotic resistance	2.48021	0.709888	1.94779	0.847622	1.10856	1.41881	0.763458	53.8096	5		1.04449	2.10789	1.01945	1.00978	0.983231	1.23297	0.489588	39.7081	5		0.869013	0.661065	b1530
	b1495	yddB	predicted porin protein	0.680894		0.877654	1.07041	0.903306	0.883066	0.159593	18.0726	4		0.385624	0.57728	0.804632	0.87062	1.20088	0.767807	0.308967	40.2402	5		0.869479	0.496433	b1495
	b0516	allC	allantoate amidohydrolase	0.948654	1.32578		0.963746	1.33693	1.14378	0.216732	18.9488	4		0.713459		1.13712	1.29141	0.836216	0.994551	0.266166	26.7625	4		0.869531	0.419303	b0516
	b3554	yiaF	conserved protein	0.546721	1.02046	0.650028	0.309897	0.786445	0.662709	0.265229	40.0219	5		0.693469	0.518759	0.544996	0.548868		0.576523	0.0791032	13.7207	4		0.869948	0.522159	b3554
	b2674	nrdI	protein that stimulates ribonucleotide reduction	1.20515		0.252026		0.907918	0.788365	0.48768	61.8596	3			0.739152	0.569401	0.795818	0.639018	0.685847	0.10114	14.7467	4		0.869961	0.752498	b2674
	b3410	feoC	predicted DNA-binding transcriptional regulator	1.47165		1.01562	1.07908	0.961758	1.13203	0.231435	20.4443	4		1.10823	0.786276	1.18417	1.04682	0.798679	0.984835	0.182266	18.5072	5		0.869976	0.340694	b3410
	b0350	mhpD	2-keto-4-pentenoate hydratase	0.623285		0.514932	0.572098	1.15077	0.71527	0.293684	41.0592	4		0.668536	0.531514	0.526756	0.786068	0.599504	0.622476	0.108222	17.3858	5		0.870267	0.583602	b0350
	b0369	hemB	porphobilinogen synthase	0.890146	0.681812	0.590267	0.931307	1.03385	0.825476	0.183551	22.2358	5		0.855	0.587833	0.666829	0.751167	0.731914	0.718548	0.099528	13.8513	5		0.870465	0.294663	b0369
	b0454	ybaZ	predicted methyltransferase	0.447651	0.711006	0.596699	0.772083	0.632135	0.631915	0.123588	19.5577	5				0.458717	0.68629	0.505806	0.550271	0.120126	21.8303	3		0.870799	0.404404	b0454
	b2444	yffM	CPZ-55 prophage; predicted protein		1.36282		2.12988	1.19969	1.56413	0.496694	31.7552	3		1.43174	1.22043	1.29602		1.50054	1.36218	0.127084	9.3294	4		0.870887	0.557123	b2444
	b0476	aes	acetyl esterase	1.65379	0.534904	1.11063	1.38785	0.973699	1.13218	0.424194	37.4672	5		1.14256			0.996297	0.819319	0.986059	0.161863	16.4152	3		0.870942	0.517554	b0476
	b0209	yafD	conserved protein	1.19345	0.475984	0.644339	0.677439	0.900952	0.778434	0.276998	35.584	5		0.81091	0.503915		0.746939	0.6514	0.678291	0.133455	19.6752	4		0.871354	0.503419	b0209
	b1113	ycfS	conserved protein	1.0683	0.8786	0.574926	0.673948	1.18225	0.875604	0.256048	29.2425	5		0.890174	0.738063	0.627189	0.882397	0.677381	0.763041	0.119191	15.6205	5		0.871445	0.409135	b1113
	b1965			1.72647	1.05444	1.55323	1.71496	0.948866	1.39959	0.371549	26.547	5		1.51806	6.49984	1.2708	0.974982	1.11692	1.22019	0.232439	19.0494	5		0.871819	0.457716	b1965
	b4211	ytfG	NAD(P)H:quinone oxidoreductase	0.7663	0.938671	0.748676	0.59698	0.923012	0.794728	0.140721	17.7069	5				0.872237	0.549201	0.658072	0.69317	0.164353	23.7104	3		0.872211	0.425552	b4211
	b1024	pgaA	predicted outer membrane protein		9.01517		1.99436	0.998199	1.49628	0.704393	47.0763	3		1.03216	1.35814	1.41506	1.41522		1.30515	0.183965	14.0954	4		0.872261	0.396907	b1024
	b2597	raiA	cold shock protein associated with 30S ribosomal subunit	0.753872			0.834605	2.00578	1.19809	0.700649	58.4807	3			1.28507		1.02275	0.827771	1.04519	0.229472	21.9549	3		0.872387	0.748392	b2597
	b3262	yhdJ	predicted methyltransferase	0.567575	1.72186	0.516493	0.57853	0.983936	0.873679	0.509892	58.3615	5		0.76598	1.05089	0.501852	0.730621		0.762337	0.225193	29.5399	4		0.872559	0.677531	b3262
	b3898	frvX	predicted endo-1,4-beta-glucanase	0.434583	2.33043	0.408043	0.383336	0.931461	0.539356	0.26224	48.6209	5		0.65419		0.33434	0.505554	0.38843	0.470629	0.141711	30.1109	4		0.872575	0.319045	b3898
	b2579	yfiD	pyruvate formate lyase subunit	1.0097	0.60799	1.18114	0.852241	1.38891	1.008	0.299725	29.7347	5		0.823909	0.891273	1.0253	0.970949	0.687734	0.879834	0.131932	14.9951	5		0.872854	0.41812	b2579
	b3082	ygjM	predicted DNA-binding transcriptional regulator	0.860341	0.797707		1.19494	0.864667	0.929415	0.179644	19.3287	4		0.901463	1.02558	0.557333	0.71539	0.858224	0.811599	0.18024	22.2081	5		0.873236	0.363483	b3082
	b2443	yffL	CPZ-55 prophage; predicted protein	2.15591	0.697913	1.20961	1.72071	0.771852	1.3112	0.624213	47.6063	5		1.0972	1.25855	1.1115		1.11481	1.14551	0.0757461	6.61241	4		0.873639	0.586989	b2443
	b3402	yhgE	predicted inner membrane protein	1.28505	0.336314	1.1858	1.04912	0.919358	0.955126	0.372525	39.0027	5		0.938571	0.589734	0.989235		0.821564	0.834776	0.177812	21.3006	4		0.873996	0.547605	b3402
	b0753	ybgS	conserved protein	3.14849	0.779477	1.01853	1.99638	1.11003	1.2261	0.532093	43.3971	5		1.11405	1.07787		1.02303		1.07165	0.0458235	4.27597	3		0.87403	0.284569	b0753
	b1838	pphA	serine/threonine-specific protein phosphatase 1	0.455028		0.366558	0.258684	1.02312	0.36009	0.0983319	27.3076	4		0.377781	0.317816	0.322602	0.241037		0.314809	0.056207	17.8543	4		0.874252	0.305252	b1838
	b2602	yfiL	predicted protein	1.41484	1.07834	1.01219	2.05329	1.14295	1.34032	0.426948	31.8541	5		0.947724	5.70678	1.45877	1.03885	1.24239	1.17193	0.227464	19.4093	5		0.874366	0.468636	b2602
	b1156	tfaE	e14 prophage; predicted tail fiber assembly protein	1.82174	0.923391	1.39596	1.64182	0.862206	1.32902	0.426482	32.0899	5		0.821211	1.21862	1.23918	1.40507	1.127	1.16222	0.215412	18.5346	5		0.87449	0.46509	b1156
	b0249	ykfF	CP4-6 prophage; predicted protein	1.95925	1.25119	0.900781	1.95925	1.02522	1.41914	0.508802	35.8529	5		1.19438	1.64762	1.10554	1.01723		1.24119	0.280436	22.594	4		0.874611	0.528861	b0249
	b2756	ygcH	predicted protein	1.91986			1.23185	0.5859	1.24587	0.667091	53.5442	3		1.34729	0.873764	1.00725	0.785802	1.43881	1.09058	0.288965	26.4964	5		0.87536	0.732844	b2756
	b0186	ldcC	lysine decarboxylase 2, constitutive	1.45472	1.15498	1.39782	0.817341	0.946265	1.15422	0.276756	23.9776	5		0.551085	1.32147	1.08333	1.02654	1.07177	1.01084	0.281549	27.853	5		0.875774	0.44023	b0186
	b3618	htrL	predicted protein	1.53893		1.837	0.872946	1.00687	1.31394	0.452026	34.4024	4		0.921116		1.06542	1.14316	1.47472	1.1511	0.23454	20.3753	4		0.876071	0.553572	b3618
	b3073	ygjG	putrescine:2-oxoglutaric acid aminotransferase, PLP-dependent	0.322644	1.20342	0.534551	0.628529	0.923341	0.722497	0.344841	47.7291	5		0.742533	0.643318			0.513483	0.633111	0.114866	18.143	3		0.876282	0.61614	b3073
	b3186	rplU	50S ribosomal subunit protein L21	0.667042	1.66703	1.11541	0.302982	0.754043	0.9013	0.516412	57.2963	5		0.684701	0.983302	0.526677	0.741327	1.01843	0.790887	0.207567	26.2448	5		0.877495	0.674989	b3186
	b1365	ynaK	Rac prophage; conserved protein	1.82314	1.02308	1.2521	1.49832	1.16082	1.35149	0.315474	23.3427	5		0.967974	1.44573	1.33791	1.08557	1.09277	1.18599	0.19802	16.6966	5		0.877543	0.354821	b1365
	b0335	prpE	predicted propionyl-CoA synthetase with ATPase domain	2.53598	0.804319	0.592731		1.25423	0.883762	0.337831	38.2265	4		0.892597	1.25784	0.425622	0.710689	0.593068	0.775963	0.318691	41.0704	5		0.878023	0.324802	b0335
	b2546	yphD	predicted sugar transporter subunit: membrane component of ABC superfamily		1.3589		1.94599	0.832595	1.37916	0.556972	40.3849	3		1.78527	1.17845	0.729992	1.20739	1.15517	1.21125	0.375948	31.038	5		0.878254	0.673881	b2546
	b0770	ybhI	predicted transporter	1.27765	1.22897	1.29765	1.73253	0.840211	1.2754	0.316629	24.8258	5			0.944411	1.28707	1.13256	1.11707	1.12028	0.140133	12.5087	4		0.878373	0.365721	b0770
	b0769	ybhH	conserved protein		0.592404	0.633876	0.701658	0.783191	0.677782	0.0834632	12.3142	4			0.566255	0.584124	0.441141	0.79133	0.595713	0.145098	24.3571	4		0.878914	0.373702	b0769
	b3451	ugpE	glycerol-3-phosphate transporter subunit			2.00954	2.00875	0.943849	1.65405	0.615048	37.1845	3		1.04489	1.72806	1.4869	1.55752		1.45434	0.291134	20.0183	4		0.879264	0.642728	b3451
	b3220	yhcG	conserved protein	0.726685		0.664619	1.32246	1.17787	0.972907	0.326528	33.5621	4		0.963499	0.616578	0.839651	0.629028	1.22888	0.855528	0.254805	29.7834	5		0.879352	0.578351	b3220
	b2047	wcaJ	predicted UDP-glucose lipid carrier transferase	0.913728	0.929793	0.727407	1.27209	0.911703	0.950944	0.197785	20.7988	5		0.673765	0.910327			0.924671	0.836254	0.140902	16.8492	3		0.879394	0.379212	b2047
	b1116	lolC	outer membrane-specific lipoprotein transporter subunit	0.588839	1.33422	0.598492	0.626764	0.938612	0.817385	0.323379	39.5626	5		0.755861	0.584033	0.619267	0.833303	0.80176	0.718845	0.111171	15.4652	5		0.879445	0.548104	b1116
	b0235			1.26426	0.956698	0.932101	1.26607	1.18844	1.12151	0.16492	14.7051	5		1.04117	1.0982	0.990992	0.970774	0.832776	0.986782	0.0992014	10.053	5		0.879866	0.164325	b0235
	b2947	gshB	glutathione synthetase	0.68844	1.75914		0.4922	1.00419	0.985991	0.556911	56.4824	4		0.878465	0.836897	0.782462	1.02245	0.821019	0.868258	0.0928096	10.6892	5		0.880594	0.702826	b2947
	b2871	ygeX	2,3-diaminopropionate ammonia-lyase	0.632891	0.365487		1.07196	0.816815	0.721787	0.29805	41.2933	4		0.951047	0.775808	0.474148	0.589771	0.388124	0.635779	0.228351	35.9167	5		0.88084	0.652143	b2871
	b1640	anmK	conserved protein	0.878234	10.524	0.556439	0.666723	0.882081	0.745869	0.161474	21.6492	5		1.84005	0.523988		0.690579	0.756851	0.657139	0.119979	18.2578	4		0.881038	0.424837	b1640
	b1712	ihfA	integration host factor (IHF), DNA-binding protein, alpha subunit	0.267525		0.728854	0.741459	0.525213	0.565763	0.222155	39.2664	4		0.564194	0.30648	0.460236	0.501065	0.661101	0.498615	0.131432	26.3593	5		0.881315	0.617703	b1712
	b3646	yicG	conserved inner membrane protein	0.582462	0.570081	0.623166	1.38176	0.659581	0.76341	0.347463	45.5146	5		0.767991	0.77104	0.694389	0.57095	0.561751	0.673224	0.102327	15.1995	5		0.881865	0.603224	b3646
	b2799	fucO	L-1,2-propanediol oxidoreductase	3.16576	1.39412	1.26469	0.975768	1.07108	1.57428	0.904507	57.4552	5		1.5447	1.34699	0.931463	1.63666	1.48319	1.3886	0.276384	19.9038	5		0.882053	0.679948	b2799
	b0646	djlB	predicted chaperone			1.24928	10.4567	1.28407	1.26667	0.0245958	1.94176	3		0.892675	1.0015	1.19342	0.955409	1.54524	1.11765	0.264105	23.6304	5		0.88235	0.404385	b0646
	b1526	yneJ	predicted DNA-binding transcriptional regulator	1.17068	0.856588	1.54426	1.85545	1.00296	1.28599	0.408895	31.7961	5		0.612006	1.03373	1.38798	1.21499	1.43196	1.13613	0.332549	29.2702	5		0.883471	0.543397	b1526
	b3216	yhcD	predicted outer membrane protein			1.13318	1.43996	1.15502	1.24272	0.171164	13.7733	3		1.04346	1.01809	0.882125	0.937826	1.60847	1.09799	0.292488	26.6384	5		0.883541	0.41144	b3216
	b2977	glcG	conserved protein		3.1398	1.68482	3.10048	1.56061	2.37143	0.866171	36.5253	4		2.43812	1.53526	2.23624	2.17937		2.09725	0.390763	18.6322	4		0.884382	0.593597	b2977
	b3027	ygiZ	conserved inner membrane protein		1.34427	1.17686	1.79201	1.06665	1.34495	0.31915	23.7296	4		0.849953	1.29818	1.40391	1.00861	1.38829	1.18979	0.247644	20.8142	5		0.884635	0.456882	b3027
	b1333	uspE	stress-induced protein	1.10353	1.64455	1.53251	1.54086	1.04774	1.37384	0.27648	20.1246	5		0.871454	1.00915	1.23666		1.7451	1.21559	0.383785	31.5719	4		0.884814	0.517267	b1333
	b2459	eutT	predicted cobalamin adenosyltransferase in ethanolamine utilization	0.562505		0.406298	1.213	1.0431	0.806226	0.38337	47.5511	4		0.919513			0.697378	0.524114	0.713669	0.198202	27.7723	3		0.885197	0.696912	b2459
	b1920	fliY	cystine transporter subunit	1.688		2.35043		0.875086	1.63784	0.738949	45.1174	3		1.43884	5.51839		1.58594	1.32549	1.45009	0.130586	9.00536	4		0.885368	0.494765	b1920
	b1593	ynfK	predicted dethiobiotin synthetase	0.764092	0.513596	0.551608	0.956498	0.698171	0.696793	0.177917	25.5337	5		0.706828	0.447365	0.879231	0.515103	0.536261	0.616958	0.175008	28.3664	5		0.885425	0.494764	b1593
	b0567	ybcH	predicted protein	2.15356	1.42037	1.62228	2.95152	1.25724	1.88099	0.687114	36.5294	5		2.11768	1.29456	1.58527			1.66583	0.417431	25.0584	3		0.885615	0.601762	b0567
	b4087	alsA	fused D-allose transporter subunits of ABC superfamily: ATP-binding components	3.26362		1.49513	1.05321	1.16591	1.74447	1.02998	59.0424	4				0.967607	3.10471	0.562931	1.54508	1.36575	88.3933	3		0.885705	0.843683	b4087
	b3442	yhhZ	conserved protein	4.01216	0.838449	1.73856	1.35518	1.11406	1.26156	0.381696	30.2558	5		1.00394	1.03227	1.11717		1.31823	1.1179	0.141955	12.6984	4		0.886126	0.291524	b3442
	b2868	xdhC	xanthine dehydrogenase, Fe-S binding subunit			0.642575	0.651424	1.21681	0.836935	0.329007	39.311	3			0.875227	0.544966	0.80489		0.741694	0.173963	23.4549	3		0.886203	0.687264	b2868
	b3366	nirD	nitrite reductase, NAD(P)H-binding, small subunit		1.80712	0.90551	4.86257	1.35258	1.35507	0.450809	33.2683	4		1.05251	1.42961	1.07871	1.24269		1.20088	0.174167	14.5033	4		0.886211	0.333754	b3366
	b0497	rhsD	rhsD element protein		0.647044	1.36763	1.62095	0.974635	1.15257	0.429283	37.2459	4			0.838185	1.11681	0.794885	1.33834	1.02206	0.254579	24.9085	4		0.886765	0.623855	b0497
	b3963	fabR	DNA-binding transcriptional repressor		0.718803	0.434872	0.171583	0.572601	0.474465	0.232836	49.0733	4		0.406308	0.433946	0.416541	0.362884	0.484628	0.420862	0.0442416	10.5121	5		0.887024	0.679136	b3963
	b0231	dinB	DNA polymerase IV	0.453239	0.903253	0.554421	1.02615	0.981058	0.783625	0.26163	33.3871	5		0.814408	0.514552	0.638509	0.633025	0.880353	0.696169	0.148493	21.33	5		0.888396	0.538507	b0231
	b2245	yfaU	predicted 2,4-dihydroxyhept-2-ene-1,7-dioic acid aldolase	0.706796			0.541439	1.36208	0.870106	0.434012	49.8804	3		1.20767	0.588383	0.545869		0.750869	0.773198	0.30282	39.1647	4		0.888625	0.759889	b2245
	b3434	yhgN	predicted antibiotic transporter	0.610144	1.39801	0.549844	1.63031	1.05352	1.04836	0.474737	45.2835	5		0.933363	1.04317	0.720331	1.09369	0.874358	0.932983	0.147162	15.7733	5		0.889941	0.626906	b3434
	b2356			2.09876	1.04832			1.00907	1.38538	0.618114	44.6169	3		1.12005	1.28103	1.25254	1.03938	1.47291	1.23318	0.1662	13.4773	5		0.890138	0.713929	b2356
	b1299	puuR	DNA-binding transcriptional repressor	0.546156	0.68619	0.695491	0.511332	0.571545	0.602143	0.083808	13.9183	5		0.668209	0.479002	0.455609	0.487991	0.58982	0.536126	0.089989	16.785	5		0.890363	0.264475	b1299
	b2874	yqeA	predicted amino acid kinase	0.956027	0.538184	0.857233	1.19919	1.03754	0.917634	0.24635	26.8463	5		0.800295	1.00519	0.94532	0.774274	0.561039	0.817224	0.172845	21.1503	5		0.890577	0.479363	b2874
	b0843	ybjH	predicted protein	1.40035	1.70307		1.68174	1.01029	1.44886	0.323294	22.3137	4		1.17307	1.2939	1.58271	1.40446	0.997868	1.2904	0.22238	17.2333	5		0.890633	0.440783	b0843
	b0403	malZ	maltodextrin glucosidase	1.11734	0.908147	0.682165	0.9733	1.19576	0.975343	0.199513	20.4556	5		0.825503	1.08784	0.465245	1.06881	0.898602	0.869201	0.251796	28.9686	5		0.891175	0.482217	b0403
	b1802	yeaW	predicted 2Fe-2S cluster-containing protein	1.36941	0.358202	1.10082	1.073	0.681749	0.916637	0.396989	43.3093	5			0.931463	0.742752		0.777174	0.81713	0.100501	12.2992	3		0.891443	0.617977	b1802
	b0819	ybiS	conserved protein	0.65038	1.17279	1.37087	0.74019	0.911072	0.96906	0.300108	30.9689	5		0.530417	1.22605	1.02413	0.796387	0.74391	0.864178	0.267856	30.9955	5		0.891769	0.576141	b0819
	b2932			1.36589	4.98396	0.839706	1.24396	0.996557	1.11153	0.237586	21.3748	5		1.09102	0.884612	1.11991	0.836695	1.02403	0.991253	0.12534	12.6446	5		0.891794	0.315725	b2932
	b1868	yecE	conserved protein	0.760538		0.633087	0.478795	1.39054	0.815741	0.400142	49.0526	4		0.775423	0.581199	0.646404	0.712961	0.922155	0.727629	0.130747	17.9689	5		0.891985	0.697054	b1868
	b2096	gatY	D-tagatose 1,6-bisphosphate aldolase 2, catalytic subunit	1.87267	1.41356	0.866876	2.05302	0.873364	1.4159	0.550075	38.8499	5		1.40636	1.59647	0.906417	1.72284	0.683026	1.26302	0.44909	35.5568	5		0.892029	0.643635	b2096
	b2455	eutE	predicted aldehyde dehydrogenase, ethanolamine utilization protein	1.0653	1.2462			1.06923	1.12691	0.103326	9.16898	3		0.768781	1.26412	0.770977	1.74289	0.48181	1.00572	0.498977	49.6142	5		0.892451	0.624354	b2455
	b3153	yhbO	predicted intracellular protease	1.94341	0.393771	0.702325	1.23876	0.779455	1.01155	0.602316	59.5441	5		0.884089	1.16846	1.01754	0.866542	0.579727	0.903271	0.217818	24.1143	5		0.892961	0.720856	b3153
	b0365	tauA	taurine transporter subunit			1.7405	1.83293	1.06011	1.54452	0.422041	27.3251	3		2.06471	1.31798	0.411249	1.72319		1.37928	0.713892	51.7583	4		0.893018	0.718356	b0365
	b3507	dctR	predicted DNA-binding ranscriptional regulator		1.58662	1.38961	1.24106	1.07007	1.32184	0.219555	16.6098	4		1.03255	1.11167	1.22757	1.08844	1.44205	1.18046	0.162578	13.7725	5		0.893039	0.32834	b3507
	b0518	fdrA	predicted acyl-CoA synthetase with NAD(P)-binding Rossmann-fold domain	1.73301	0.70155	1.30659	1.5278	0.764362	1.20666	0.45851	37.9982	5		0.880957	1.13649	1.35434	1.08334	0.933523	1.07773	0.186758	17.3288	5		0.89315	0.584281	b0518
	b0992	yccM	predicted 4Fe-4S membrane protein	1.36053	1.0232	1.27238	1.84323	1.21099	1.34207	0.306276	22.8213	5		1.05232	1.44452	1.36234	1.06015	1.07416	1.1987	0.189303	15.7923	5		0.893174	0.404258	b0992
	b0863	artI	arginine transporter subunit	0.452445	1.20555	1.94534	1.37823	1.10703	1.21772	0.536945	44.0943	5		0.425303	1.19781	1.44526	0.945366	1.42448	1.08764	0.422025	38.8018	5		0.893181	0.682029	b0863
	b1726	yniB	predicted inner membrane protein		5.16071		1.30169	1.01108	1.15639	0.205487	17.7697	3		1.82418	0.987182	0.949269	0.599678	0.804742	1.03301	0.467694	45.2748	5		0.89331	0.389532	b1726
	b2418	pdxK	pyridoxal-pyridoxamine kinase/hydroxymethylpyrimidine kinase	2.51895		0.942517	0.83823	1.48682	1.44663	0.769363	53.1832	4		1.13266	1.42248	1.18434	1.25989	1.46449	1.29277	0.145588	11.2617	5		0.893646	0.718352	b2418
	b3471	yhhQ	conserved inner membrane protein	0.55109	1.19719	0.725801	0.481439	0.895479	0.7702	0.287828	37.3705	5		0.728749	0.654279	0.673179	0.630497	0.754735	0.688288	0.051906	7.54132	5		0.893648	0.56315	b3471
	b2748	ftsB	cell division protein	0.578917	0.655151	0.536779	1.12892	1.06459	0.792871	0.281552	35.5104	5		0.725936	0.558558	0.790553	0.637616	0.831272	0.708787	0.111374	15.7133	5		0.89395	0.56072	b2748
	b1907	tyrP	tyrosine transporter	1.41281	0.650671	1.0216	0.97861	0.780832	0.968904	0.290072	29.9382	5		0.773549	0.991453	0.781135	0.748382	1.03739	0.866382	0.136651	15.7726	5		0.894187	0.502894	b1907
	b1046	ymdC	predicted hydrolase	0.567211		0.816094	1.23075	1.03739	0.912862	0.286006	31.3307	4		0.766813		0.907562		0.775882	0.816752	0.0787741	9.64479	3		0.894716	0.560514	b1046
	b0345	lacI	DNA-binding transcriptional repressor	1.00366	1.41309	0.811453		0.973496	1.05042	0.256084	24.3791	4		1.13264	1.13939	0.6987	1.12364	0.605679	0.940009	0.264852	28.1754	5		0.894886	0.547804	b0345
	b0310	ykgH	predicted inner membrane protein	1.70993	14.2479	1.23172	1.9377	1.19504	1.5186	0.364802	24.0223	5		1.36377	1.41885	1.17177	1.369	1.47275	1.35923	0.113687	8.36406	5		0.895057	0.348559	b0310
	b4310	yjhT	conserved protein	1.09734	0.609625	0.868589	1.53471	0.921411	1.00633	0.343155	34.0995	5		0.574063		1.05439		1.07459	0.901017	0.28333	31.4456	3		0.895346	0.65809	b4310
	b1004	wrbA	predicted flavoprotein in Trp regulation	0.642887			0.697705	1.22382	0.854803	0.32075	37.5232	3		1.28381	0.505144	0.584162	0.647698	0.8075	0.765663	0.310223	40.517	5		0.895718	0.71873	b1004
	b0359			1.97283	0.813971	1.35642	1.15881	0.754855	1.21138	0.492432	40.6506	5		0.879931	1.22562	1.22039	1.05114	1.04913	1.08524	0.143693	13.2406	5		0.895874	0.607655	b0359
	b2266	elaB	conserved protein	1.11883	1.33077	0.93439	1.3047	1.21889	1.18152	0.161127	13.6373	5		0.866875	1.31162	1.2101	0.962347	0.943215	1.05883	0.191251	18.0625	5		0.896164	0.305459	b2266
	b2704	srlB	glucitol/sorbitol-specific enzyme IIA component of PTS			0.537134	1.21581	0.959204	0.904049	0.342682	37.9053	3		0.745465	0.83233	0.828512		0.835105	0.810353	0.0433428	5.34864	4		0.89636	0.6832	b2704
	b2649			5.75962	1.19753	1.89346	1.58494	1.06194	1.43447	0.377812	26.3382	5		0.998116	1.18781	1.68424		1.27314	1.28583	0.289414	22.508	4		0.896381	0.31487	b2649
	b4255	rraB	conserved protein	1.59439	2.47295	1.69986	1.04244	1.92769	1.74747	0.519992	29.7569	5		1.5877	1.08699		1.56218	2.02908	1.56649	0.384869	24.5689	4		0.896434	0.567716	b4255
	b1644	ydhJ	undecaprenyl pyrophosphate phosphatase	1.34367			1.03422	1.45359	1.27716	0.217454	17.0264	3		3.6168	0.8955		1.39542		1.14546	0.353499	30.8609	3		0.896883	0.495922	b1644
	b2252	ais	conserved protein		0.96082	0.909881	0.261012	0.688856	0.705142	0.318751	45.2037	4		0.524243	0.533076	0.608309		0.865829	0.632864	0.159825	25.2542	4		0.897498	0.704052	b2252
	b2687	luxS	S-ribosylhomocysteinase	0.602548	1.18122	1.37306	0.531102	1.07578	0.952743	0.368926	38.7225	5		0.425401	0.714123	0.959973	0.90322	1.27469	0.855481	0.3138	36.6812	5		0.897913	0.665616	b2687
	b4331	kptA	2'-phosphotransferase			0.706273	0.532077	0.790215	0.676188	0.131673	19.4728	3		0.653936	0.770494	0.568518	0.481555	0.561356	0.607172	0.109811	18.0857	5		0.897933	0.491467	b4331
	b4394	yjjX	thiamin metabolism associated protein	1.11498	0.85847	0.739273	3.61705	0.978013	0.922685	0.161042	17.4537	5		1.00602	0.92152	1.058	0.565538	0.593197	0.828854	0.233104	28.1236	5		0.898306	0.311834	b4394
	b1831	proQ	predicted structural transport element	0.726593	7.67858	0.704301	0.358989	0.735335	0.631304	0.182013	28.8313	5		0.587159	0.425198	0.537415	0.529113	0.757561	0.567289	0.121592	21.4338	5		0.898599	0.355533	b1831
	b3243	aaeR	predicted DNA-binding transcriptional regulator, efflux system	0.448754	1.39374	1.26642	1.54478	1.01939	1.13462	0.42908	37.8172	5			1.03081		1.08171	0.946918	1.01981	0.0680644	6.6742	3		0.898816	0.587015	b3243
	b3231	rplM	50S ribosomal subunit protein L13	0.304359	0.698226	0.797494	0.14173	0.558973	0.500157	0.272904	54.5638	5		0.515666		0.392627	0.418103	0.471955	0.449588	0.0550831	12.2519	4		0.898894	0.704957	b3231
	b1592	clcB	predicted voltage-gated chloride channel		1.28261	1.93793		1.12063	1.44706	0.432754	29.9058	3		0.975258	1.25164		1.08186	1.89736	1.30153	0.413202	31.7475	4		0.899431	0.675111	b1592
	b2574	nadB	quinolinate synthase, L-aspartate oxidase (B protein) subunit	0.941149	0.664152	0.821143		1.17682	0.900815	0.216149	23.9948	4		0.760927	0.663614	0.848081	0.741956	1.03898	0.810712	0.14348	17.6981	5		0.899975	0.505405	b2574
	b3211	yhcC	predicted Fe-S oxidoreductase	0.759359		1.09332	0.508325	0.565839	0.73171	0.263905	36.0669	4			0.622582	0.720464	0.626368	0.665465	0.65872	0.0454988	6.90716	4		0.900247	0.621616	b3211
	b3649	rpoZ	RNA polymerase, omega subunit	0.893756		0.486071	0.390934	0.748775	0.629884	0.232051	36.8403	4			0.440704	0.455836	0.678846	0.692852	0.56706	0.137425	24.2346	4		0.90026	0.661365	b3649
	b4358	yjjN	predicted oxidoreductase, Zn-dependent and NAD(P)-binding	0.442984		0.631377	0.453601	0.740897	0.567215	0.14448	25.4719	4		0.343132			0.618908	0.569959	0.510666	0.147139	28.8131	3		0.900305	0.636438	b4358
	b2367	emrY	predicted multidrug efflux system	0.928119		0.789515	1.01274	1.92019	1.16264	0.513345	44.1534	4		1.13124	0.929068	1.08949	1.04222	1.04247	1.0469	0.0755864	7.22004	5		0.900449	0.684184	b2367
	b3850	hemG	protoporphyrin oxidase, flavoprotein	0.395609	0.84875	0.379764	0.32362	0.66254	0.522057	0.224765	43.0537	5		0.38438	0.478379	0.464253	0.473368	0.550717	0.470219	0.059077	12.5637	5		0.900705	0.641109	b3850
	b2766	ygcN	predicted oxidoreductase with FAD/NAD(P)-binding domain	0.417046	3.27267	0.240312	0.197178	0.93547	0.447502	0.338935	75.7393	5		0.439116	0.330381	0.339257	0.515476	0.391195	0.403085	0.0765363	18.9876	5		0.900745	0.353076	b2766
	b3833	ubiE	bifunctional 2-octaprenyl-6-methoxy-1,4-benzoquinone methylase/ S-adenosylmethionine:2-DMK methyltransferase	0.97682		0.745288	1.11356	1.14306	0.994682	0.181351	18.232	4		0.940163	0.636354	1.04657	0.772048	1.08501	0.89603	0.189162	21.1111	5		0.900821	0.453599	b3833
	b3809	dapF	diaminopimelate epimerase	0.636393	0.948754	0.994063	1.39746	0.981731	0.991681	0.270572	27.2842	5		1.087	0.604746	0.952937	1.02782	0.796834	0.893867	0.194769	21.7894	5		0.901366	0.532001	b3809
	b3862	yihG	predicted endonuclease	0.930995	0.780737	1.1893	0.825104	0.907006	0.926628	0.158897	17.1478	5		0.433255	0.565141	1.25934	0.861359	1.05745	0.835309	0.340759	40.7944	5		0.90145	0.607766	b3862
	b1064	grxB	glutaredoxin 2 (Grx2)	1.35106	0.789118	1.5432	1.60127	1.18631	1.29419	0.326449	25.2241	5		0.999946	1.4766	1.35119	1.05838	0.947314	1.16669	0.233315	19.9981	5		0.901477	0.499597	b1064
	b3470	sirA	conserved protein required for cell growth	0.698242		0.889589	0.265804	1.0789	0.733133	0.34816	47.4893	4		0.668962	0.624444			0.689616	0.661007	0.0333065	5.03874	3		0.90162	0.707517	b3470
	b3007			1.70797	1.29553			1.0479	1.35046	0.33345	24.6915	3		1.14307	1.44866	1.1769		1.10269	1.21783	0.156848	12.8793	4		0.901786	0.573918	b3007
	b1028			1.68602	1.03715	1.66038	1.73634	0.786869	1.38135	0.438346	31.7331	5		1.09975			0.95649	1.68107	1.24577	0.383727	30.8024	3		0.901849	0.666463	b1028
	b2016	yeeZ	predicted epimerase, with NAD(P)-binding Rossmann-fold domain	0.821198	0.866687	0.944263	0.988626	1.10983	0.946122	0.112391	11.8792	5		0.764016	0.649687	1.01102	0.848397	0.994745	0.853573	0.153571	17.9915	5		0.902181	0.311305	b2016
	b0703			0.668562	0.514785	0.797007	0.88236	0.856431	0.743829	0.152335	20.4799	5		3.2897	0.645584	0.576469	0.781757	0.682785	0.671649	0.085608	12.7459	5		0.902961	0.440127	b0703
	b3441	yhhY	predicted acetyltransferase	1.20393		0.495977	1.31964	1.01825	1.00945	0.364129	36.0721	4		1.33483	0.581331		0.818938		0.911699	0.385218	42.2528	3		0.903166	0.749784	b3441
	b1648	ydhL	conserved protein	1.7299	0.522501	0.948261	1.35798	0.703359	1.0524	0.49139	46.6923	5		0.935509	1.21995	1.01034	0.768091	0.820283	0.950836	0.177933	18.7133	5		0.903492	0.681889	b1648
	b0200	gmhB	D,D-heptose 1,7-bisphosphate phosphatase	1.25716	0.564845	0.957806	0.674959	1.00211	0.891377	0.275651	30.9242	5		0.798331	0.611771	1.11626	0.766008	0.736553	0.805784	0.187393	23.256	5		0.903977	0.583685	b0200
	b4024	lysC	aspartokinase III	0.761998	0.728958	0.457448	0.669063	0.839327	0.691359	0.14449	20.8994	5		0.705014	0.580382	0.506694	0.784398	0.548738	0.625045	0.115772	18.5222	5		0.904083	0.447404	b4024
	b3690	cbrA	predicted oxidoreductase with FAD/NAD(P)-binding domain	1.35579	1.42023	1.23904	1.0171	1.14769	1.23597	0.161256	13.0469	5		0.964384	1.06592	1.36563	1.13207	1.06095	1.11779	0.150899	13.4998	5		0.904384	0.265882	b3690
	b3892	fdoI	formate dehydrogenase-O, cytochrome b556 subunit	1.47146	1.72358		1.61769	0.910278	1.43075	0.362053	25.3051	4		1.17673	1.31797	1.46391	1.43977	1.07165	1.29401	0.168736	13.0399	5		0.904422	0.523674	b3892
	b3041	ribB	3,4-dihydroxy-2-butanone-4-phosphate synthase	0.265645	1.41273	0.441957	0.243762	0.685304	0.409167	0.204356	49.9445	5		0.346107		0.480562	0.259055	0.394525	0.370062	0.0925651	25.0134	4		0.904428	0.333467	b3041
	b2545	yphC	predicted oxidoreductase, Zn-dependent and NAD(P)-binding	0.415942	0.852471		1.85314	1.01018	1.03293	0.601803	58.2615	4		0.666923	1.20619			0.929991	0.934368	0.26966	28.8601	3		0.904577	0.784444	b2545
	b0909	ycaL	predicted peptidase with chaperone function			1.38609	1.53543	0.849783	1.2571	0.360566	28.6823	3		0.991738	1.0059	1.4599	1.13478	1.09644	1.13775	0.189867	16.6879	5		0.905061	0.636273	b0909
	b2847	yqeI	predicted transcriptional regulator	2.93033	0.981609	1.64897	1.8286	1.72718	1.82334	0.702428	38.5243	5		0.879841	1.21741	573.735	0.0757228	4.4294	1.65059	1.91344	115.924	5		0.90526	0.374559	b2847
	b3674	yidF	predicted DNA-binding transcriptional regulator	1.38287	0.945843	1.33629	1.62326	1.11019	1.27969	0.260804	20.3803	5		0.811156	1.18026	1.34332	1.14681	1.31476	1.15926	0.212034	18.2904	5		0.905894	0.447119	b3674
	b1822	rrmA	23S rRNA m1G745 methyltransferase	1.55071	1.66523	0.845437	1.04433	0.886982	1.19854	0.383196	31.972	5		1.24929	0.982179	1.22853	1.0395	0.9308	1.08606	0.144921	13.3437	5		0.906155	0.565525	b1822
	b1343	dbpA	ATP-dependent RNA helicase, specific for 23S rRNA	1.66454	1.42481	1.01563	1.76536	0.987203	1.37151	0.35992	26.2427	5		1.04332	1.25547	1.15799	1.42179	1.33626	1.24297	0.148253	11.9273	5		0.906277	0.491548	b1343
	b3915	fieF	zinc transporter	1.09587	1.39239	1.60163	1.6413	1.27333	1.4009	0.227745	16.257	5		0.903496	1.47315	1.68965	0.724098	1.55913	1.26991	0.428167	33.7164	5		0.90649	0.567626	b3915
	b0284	yagR	predicted oxidoreductase with molybdenum-binding domain		0.813351	1.45523	1.94608	1.16847	1.34578	0.478632	35.5653	4		1.14642	1.80686	1.33451	1.0622	0.751162	1.22023	0.389757	31.9413	5		0.906707	0.686784	b0284
	b1163	ycgF	predicted FAD-binding phosphodiesterase	1.43878	2.04214	1.08088	1.6893	0.86077	1.42237	0.471077	33.1191	5		0.986413	1.65009	1.46167	1.14499	1.20632	1.2899	0.26426	20.4869	5		0.906863	0.602306	b1163
	b1685	ydiH	predicted protein	1.96633	1.26055	0.996321	1.24617	1.16135	1.32615	0.372988	28.1257	5		0.685498	1.71944	1.25236	1.08032	1.27598	1.20272	0.373274	31.0358	5		0.906927	0.61513	b1685
	b2076	mdtC	multidrug efflux system, subunit C	1.95977	1.21074	1.2811	7.2417	0.857809	1.32736	0.460492	34.6925	5		1.39468	1.19947	1.02475	1.02646	1.37449	1.20397	0.179647	14.9213	5		0.907044	0.33666	b2076
	b0933	ssuB	alkanesulfonate transporter subunit	1.42033		1.54514	1.79746	1.18396	1.48672	0.255633	17.1944	4		1.09069	1.92817	1.48687	1.15255	1.08658	1.34897	0.363533	26.9489	5		0.907347	0.526875	b0933
	b2176	rtn	conserved protein	0.41649	0.789478	0.572277	0.45706	0.854928	0.618046	0.196302	31.7618	5		0.355158	0.560265	0.479188	0.716072	0.693269	0.56079	0.150505	26.838	5		0.90736	0.619673	b2176
	b1285	gmr	modulator of Rnase II stability	0.764243	21.6365		4.16886	0.945917	1.95967	1.91537	97.7391	4		2.43373	0.855443	1.64352	1.70522	2.2531	1.7782	0.618506	34.7827	5		0.907397	0.381402	b1285
	b2641			1.60719		1.98535	1.07916	1.1518	1.45587	0.423327	29.0772	4		2.36354	0.752179	1.28652	0.818784	1.38608	1.32142	0.645772	48.8695	5		0.907648	0.718683	b2641
	b0954	fabA	beta-hydroxydecanoyl thioester dehydrase	0.869952	0.703287	0.734012	1.02315	1.02376	0.870834	0.152792	17.5455	5		0.860092		0.969541		0.543222	0.790952	0.221409	27.9928	3		0.90827	0.617968	b0954
	b2375	yfdX	predicted protein	2.00334		0.630746	1.04269	0.754341	1.10778	0.62149	56.1022	4		1.59456	0.940974	0.670702		0.820466	1.00668	0.407219	40.4518	4		0.908732	0.796036	b2375
	b1001	yccE	predicted protein		6.29823	1.13981	1.69086	1.5736	1.46809	0.290285	19.773	4		1.35887	1.04605	1.50206	1.43173		1.33468	0.201102	15.0674	4		0.909127	0.350179	b1001
	b2036	glf	UDP-galactopyranose mutase, FAD/NAD(P)-binding	1.73601	0.970048	1.94322	1.06595	0.949607	1.33297	0.470327	35.2842	5		1.01412	1.10663	1.56088	0.891032	1.48708	1.21195	0.296084	24.4304	5		0.909211	0.641756	b2036
	b2057	wcaC	predicted glycosyl transferase		0.955468	1.14137		1.16519	1.08734	0.114826	10.5602	3			0.843097	0.916394	0.874179	1.32101	0.98867	0.223588	22.6151	4		0.909254	0.48463	b2057
	b1165	ymgA	predicted protein		1.04652	1.30058	0.965159	2.05702	1.34232	0.497422	37.057	4		0.82923	1.4453		1.13341	1.47412	1.22051	0.303057	24.8303	4		0.909258	0.693274	b1165
	b1990	erfK	conserved protein with NAD(P)-binding Rossmann-fold domain	0.905591	0.905517	0.968472	0.81835	1.14588	0.948763	0.122461	12.9074	5		0.893163	0.8452	0.958831	0.696285	0.921241	0.862944	0.101976	11.8172	5		0.909547	0.264028	b1990
	b0680	glnS	glutamyl-tRNA synthetase	0.742073	1.06742	0.710491	0.371818	0.842217	0.746803	0.251919	33.7329	5		0.483139	0.557216	0.798508	0.709202	0.849385	0.67949	0.156059	22.967	5		0.909865	0.627855	b0680
	b0011	yaaW	conserved protein	1.20043	17.2004		1.27438	1.22394	1.23292	0.0377817	3.06442	4		1.08068	1.115	1.2881	1.19091	0.93655	1.12225	0.130849	11.6596	5		0.910239	0.379715	b0011
	b3553	ghrB	2-keto-D-gluconate reductase (glyoxalate reductase) (2-ketoaldonate reductase)	1.22412	0.689387	0.710285	1.47917	1.13413	1.04742	0.341685	32.6216	5		0.914678	1.0328	0.977071		0.890995	0.953887	0.0639212	6.70113	4		0.910703	0.578927	b3553
	b1202	ycgV	predicted adhesin		13.5186	0.692396	1.74713		1.21977	0.745812	61.1439	3		0.876114	1.25146	1.0268	1.28942		1.11095	0.194785	17.5333	4		0.910788	0.413631	b1202
	b3595			0.296196	0.8413	0.422651	0.350258	0.682676	0.518616	0.233487	45.0212	5			0.457615	0.394421	0.508284	0.5291	0.472355	0.0600051	12.7034	4		0.910799	0.68925	b3595
	b2735	ygbI	predicted DNA-binding transcriptional regulator	0.374399	0.676596	1.38555	0.794694	0.761303	0.798508	0.367676	46.0454	5		0.224811	0.71457	0.914379	0.754515	1.02864	0.727383	0.307896	42.3294	5		0.910927	0.748944	b2735
	b0447	ybaO	predicted DNA-binding transcriptional regulator	1.59268	0.657519	1.45905	1.31524	0.903055	1.18551	0.392426	33.102	5		0.943779	1.25093	1.21873	1.08372	0.905185	1.08047	0.156199	14.4566	5		0.911397	0.601078	b0447
	b3543	dppB	dipeptide transporter	0.434051	0.761225		1.32433	0.608159	0.781942	0.385506	49.3011	4		0.817053	0.708568	0.58302	0.902162	0.553131	0.712787	0.149233	20.9365	5		0.91156	0.752843	b3543
	b2177	yejA	predicted oligopeptide transporter subunit	1.10994	4.69799	1.49851	0.749318	1.16542	1.1308	0.306795	27.1309	5			0.817817		0.982028	1.29305	1.03096	0.241366	23.4116	3		0.911716	0.327573	b2177
	b1398	paaK	phenylacetyl-CoA ligase	1.80521	0.781865	1.05166	1.75376	1.03841	1.28618	0.463342	36.0247	5		1.04985	1.14026	1.68759	1.05626	0.931562	1.1731	0.297052	25.3218	5		0.912084	0.660248	b1398
	b0805	fiu	predicted iron outer membrane transporter		0.935812	1.74254	2.38315	1.03225	1.52344	0.67668	44.4179	4			2.19326	0.763899		1.21332	1.39016	0.730902	52.5769	3		0.912514	0.816856	b0805
	b0324	yahJ	predicted deaminase with metallo-dependent hydrolase domain			1.65281	1.45335	1.18092	1.42903	0.236888	16.5769	3		1.20285	1.55486	1.56908	0.889466		1.30407	0.324175	24.8588	4		0.912556	0.581358	b0324
	b4145	yjeJ	predicted protein	189.602		1.00105		1.07901	1.04003	0.0551293	5.30075	3		0.734867	0.824637	1.30399	0.810684	1.07207	0.949249	0.235379	24.7964	5		0.912714	0.422094	b4145
	b3587	yiaW	conserved inner membrane protein	5.81309	1.00869	1.08802	1.08472	1.20928	1.09768	0.0829351	7.55551	5		0.547431	1.04637	0.69954	1.51191	1.20669	1.00239	0.387938	38.7015	5		0.91319	0.336428	b3587
	b1275	cysB	DNA-binding transcriptional dual regulator, O-acetyl-L-serine-binding	0.986244	0.96669	1.08245	0.98668	1.19161	1.04274	0.094681	9.08006	5		1.04581	0.956651	0.717318	0.989986	1.05412	0.952778	0.137628	14.445	5		0.913728	0.267173	b1275
	b3319	rplD	50S ribosomal subunit protein L4	0.450668	1.36266	0.819461		1.25918	0.972993	0.420373	43.2041	4		3.5665		0.810978	0.968303		0.88964	0.111246	12.5046	3		0.914334	0.462945	b3319
	b1025	ycdT	predicted diguanylate cyclase	1.67878	0.57489	1.34736	1.29526	0.876345	1.15453	0.431623	37.3853	5		0.936846	1.02474	1.22273	1.0771	1.01791	1.05587	0.105914	10.031	5		0.914544	0.642995	b1025
	b1964			1.80986	1.14396	1.77721	1.14536	1.24696	1.42467	0.339505	23.8304	5		0.923127		1.24695	1.03397	2.00873	1.30319	0.489175	37.5366	4		0.914734	0.689991	b1964
	b3502	arsB	arsenite/antimonite transporter		1.07027		6.82625	0.995786	1.03303	0.0526657	5.0982	3		0.8144	1.15691		0.865298		0.945536	0.184816	19.5461	3		0.915307	0.405644	b3502
	b2833	ygdR	predicted protein	3.97356	0.992318	0.788816	1.73702	0.931497	1.11241	0.425048	38.2096	5		1.3196	1.02051	1.04216	0.668657	1.04007	1.0182	0.231344	22.7209	5		0.915309	0.328751	b2833
	b3583	sgbE	L-ribulose-5-phosphate 4-epimerase	1.17053		1.00752	3.3463	0.985813	1.05462	0.100965	9.57361	4				0.99568	1.20521	0.695335	0.965408	0.256281	26.5464	3		0.915408	0.337133	b3583
	b1510	ydeK	predicted lipoprotein	1.57393	1.10895	1.76405	1.34514	0.938466	1.34611	0.335036	24.8893	5		1.0204	1.51624	1.48332		0.914852	1.2337	0.310538	25.1712	4		0.916499	0.618996	b1510
	b2058	wcaB	predicted acyl transferase	0.952628	1.39395	0.66917	2.19964	0.86277	1.21563	0.610815	50.2467	5		1.12495	1.26022	1.30281		0.770565	1.11463	0.241588	21.6742	4		0.916918	0.747917	b2058
	b2740	ygbN	predicted transporter	0.363204	1.42561	0.512908	0.775843	0.763673	0.768247	0.406652	52.9324	5		0.678429	0.929671	0.723742	0.725588	0.464794	0.704445	0.165571	23.5038	5		0.91695	0.75769	b2740
	b1931	yedK	predicted protein		0.845249	1.24178	1.79975	1.16615	1.26323	0.396842	31.4147	4		0.914787	1.26841	1.24791	0.840014	1.52344	1.15891	0.280216	24.1792	5		0.917417	0.67441	b1931
	b0460	hha	modulator of gene expression, with H-NS	2.53957		1.77258	1.54653	1.22964	1.77208	0.558018	31.4894	4		1.66737	1.16462	1.43383	1.53103	2.33291	1.62595	0.435962	26.8127	5		0.917539	0.683618	b0460
	b1172	ymgG	predicted protein	1.04646	0.922097	0.748862	1.26542	0.876194	0.971807	0.195639	20.1315	5		0.817854	0.621386	1.15643	0.922051	0.94208	0.891961	0.194978	21.8595	5		0.917837	0.53612	b1172
	b0338	cynR	DNA-binding transcriptional dual regulator	1.19225	2.94633	2.06928		0.882509	1.77259	0.930003	52.4658	4		1.97402	2.0823	1.00166	1.4553		1.62832	0.499416	30.6707	4		0.91861	0.79644	b0338
	b2686	emrB	multidrug efflux system protein	1.72989		0.572284	1.30009	0.632001	1.05857	0.556008	52.5247	4		1.3683	0.774953	1.1209	0.837666	0.760903	0.972545	0.264886	27.2364	5		0.918738	0.789748	b2686
	b1674	ydhY	predicted 4Fe-4S ferridoxin-type protein	1.3141	0.76925	1.10878	0.582309	1.0621	0.967307	0.290135	29.9941	5		0.713458	0.744973	1.20771			0.888715	0.276709	31.1359	3		0.918751	0.71983	b1674
	b3994	thiC	thiamin (pyrimidine moiety) biosynthesis protein	0.700845		0.580864	0.834699	1.66181	0.944555	0.489282	51.8003	4		0.628201	0.855084	0.914723	1.08495	0.856527	0.867896	0.163593	18.8493	5		0.918841	0.780805	b3994
	b2368	emrK	EmrKY-TolC multidrug resistance efflux pump, membrane fusion protein component		0.961377	1.35962		0.997113	1.10604	0.220335	19.9212	3		0.852282		0.704807	0.705336	1.8045	1.01673	0.529746	52.1028	4		0.919257	0.775624	b2368
	b0849	grxA	glutaredoxin 1, redox coenzyme for ribonucleotide reductase (RNR1a)	1.58696	0.593301	1.43758	1.21689	0.907351	1.14842	0.402148	35.0176	5		0.815491	1.09425	1.18231	1.10337	1.08358	1.0558	0.139879	13.2487	5		0.919351	0.647432	b0849
	b1304	pspA	regulatory protein for phage-shock-protein operon	0.42192	0.397901	3.12119	0.470113	1.98514	0.818768	0.77816	95.0404	5		0.238264	0.51054		1.50942		0.752741	0.669295	88.9143	3		0.919358	0.46342	b1304
	b0427	yajR	predicted transporter	0.352416	0.832673	0.610158	0.614344	0.669124	0.615743	0.172687	28.0453	5		0.778546	0.452108	0.473162		0.561183	0.56625	0.149208	26.3502	4		0.91962	0.658991	b0427
	b3215	yhcA	predicted periplasmic chaperone protein	1.40255		1.53967	1.87444	1.03995	1.46415	0.345342	23.5865	4		1.26087	0.941368	1.65807	1.07979	1.79265	1.34655	0.36699	27.2541	5		0.919678	0.637217	b3215
	b1031			1.71126	1.29744	1.54688	0.571281	1.04895	1.23516	0.448086	36.2775	5		0.722465	1.04751	1.14082		1.63303	1.13596	0.376788	33.1693	4		0.919682	0.729037	b1031
	b3503	arsC	arsenate reductase			1.12341	2.18695	0.863477	1.39128	0.70122	50.4011	3			0.992481	1.65403	1.6423	0.829641	1.27961	0.430755	33.6629	4		0.919739	0.822728	b3503
	b2019	hisG	ATP phosphoribosyltransferase	1.66939	0.503657	1.60911	1.42669	0.924181	1.22661	0.499129	40.6919	5		0.938414	1.21769	1.11714	1.29526	1.07249	1.1282	0.137078	12.1502	5		0.919772	0.689895	b2019
	b3844	fre	flavin reductase	0.710243	2.99923	0.469644	1.00355	0.694197	1.17537	1.03705	88.2316	5		1.21792	1.07702	0.922774	1.20979	0.978535	1.08121	0.133119	12.3121	5		0.919884	0.849924	b3844
	b3638	yicR	protein associated with replication fork, possible DNA repair protein	1.14238	0.583363	1.25357	0.739809	1.05782	0.955388	0.282509	29.5701	5		0.815246	0.918913	1.01408	0.925048	0.722646	0.879187	0.112329	12.7765	5		0.920241	0.598314	b3638
	b0574	cusB	copper/silver efflux system, membrane fusion protein		0.696811	2.10361	0.521619	2.23552	1.38939	0.905308	65.1586	4		0.153948			1.20685	1.35068	1.27877	0.101706	7.95343	3		0.92038	0.447434	b0574
	b3944	yijF	conserved protein	0.528361	0.536925	0.546605	0.577663	0.816404	0.601192	0.121742	20.2501	5		0.666169	0.648247	0.405	0.453126	0.594231	0.553354	0.117747	21.2788	5		0.920429	0.545308	b3944
	b0835	yliG	predicted SAM-dependent methyltransferase	1.02483	0.850916	0.736181	1.18768	1.0394	0.967801	0.176093	18.1952	5			0.842573	0.896449	0.956219	0.867959	0.8908	0.0488504	5.48388	4		0.920437	0.395376	b0835
	b1384	feaR	DNA-binding transcriptional dual regulator	0.993381	0.933951	1.73787	0.780561	1.16812	1.12278	0.370777	33.0232	5			1.04532	0.9169	1.01924	1.15303	1.03362	0.0969991	9.38437	4		0.920597	0.629326	b1384
	b0520	ylbF	conserved protein	1.04641	1.00139	0.680876	1.03241	0.954397	0.943097	0.150778	15.9875	5		0.760836	0.871813	1.18385	0.880538	0.645195	0.868447	0.200662	23.1058	5		0.920847	0.526141	b0520
	b3029	ygiN	quinol monooxygenase	0.470913	1.21427	0.830941	0.461365	0.883941	0.772287	0.315737	40.8834	5		0.70753	0.718006	0.714731	0.609186	0.807018	0.711294	0.0701074	9.85631	5		0.921024	0.693081	b3029
	b0617	citD	citrate lyase, acyl carrier (gamma) subunit		0.978074	1.05618	1.10513	1.08023	1.0549	0.0549798	5.21183	4		1.12474			1.0059	0.785236	0.971958	0.172277	17.7247	3		0.921372	0.495935	b0617
	b1995			1.35586		1.6153	1.76969	0.967354	1.42705	0.350821	24.5837	4		1.16409	1.74376		0.952948	1.39994	1.31519	0.339071	25.7812	4		0.921612	0.662712	b1995
	b2374	frc	formyl-CoA transferase, NAD(P)-binding	0.751436		0.410585	0.42778	1.33522	0.731255	0.432089	59.0887	4		1.09417	0.533185	0.423617	0.644788		0.673941	0.294347	43.6755	4		0.921623	0.834666	b2374
	b1968	yedV	predicted sensory kinase in two-component regulatory system with YedW	1.50615			1.94858	0.921454	1.45873	0.515204	35.3187	3		1.69758	1.20954	1.41039	1.15065	1.25524	1.34468	0.219526	16.3255	5		0.921817	0.744927	b1968
	b1903			2.82079		1.2609	0.60817	0.674874	0.847983	0.359152	42.3537	4		0.818723	0.571433	0.914832	0.671652	0.934627	0.782253	0.157164	20.0912	5		0.922487	0.35807	b1903
	b3939	metB	cystathionine gamma-synthase, PLP-dependent	0.646584		0.749177	1.88535	0.944227	1.05634	0.566299	53.6097	4		0.593445	0.875799	1.22382	1.05813	1.12178	0.974594	0.247885	25.4347	5		0.922618	0.80162	b3939
	b1321	ycjX	conserved protein with nucleoside triphosphate hydrolase domain	1.93166	0.643156	1.84842	1.77506	1.11008	1.46167	0.56175	38.432	5		1.01397	1.8711	1.62767	1.0933	1.13957	1.34912	0.378068	28.0232	5		0.922998	0.721117	b1321
	b0136	yadK	predicted fimbrial-like adhesin protein		1.84626	0.98346		0.902363	1.24403	0.523121	42.0506	3		1.01829	1.27771	0.924783	1.33581	1.18603	1.14853	0.173345	15.0929	5		0.923232	0.78527	b0136
	b2757	ygcI	predicted protein	1.20919	1.7448	1.18277	1.39636	0.993094	1.30524	0.284244	21.7771	5		1.15876	1.30798	1.34584	1.064	1.14887	1.20509	0.117909	9.78427	5		0.923266	0.49742	b2757
	b0824	ybiY	predicted pyruvate formate lyase activating enzyme	1.91275	1.17181	1.37723	7.54411	1.1842	1.4115	0.347154	24.5947	5		1.08935	1.84634	1.23107	1.19831	1.15354	1.30372	0.30795	23.6208	5		0.923644	0.34164	b0824
	b1606	folM	dihydrofolate reductase isozyme	0.645865		0.507384	0.626163	0.911571	0.672746	0.170562	25.3532	4		0.619525	0.49353	0.719126	0.517393	0.757539	0.621423	0.117533	18.9135	5		0.923711	0.629622	b1606
	b2300	yfcE	predicted phosphatase	0.924754			0.789606	1.35717	1.02384	0.296473	28.9569	3		1.38647	0.597572	0.759823	0.83356	1.1523	0.945946	0.318309	33.6499	5		0.923916	0.741797	b2300
	b2869	ygeV	predicted DNA-binding transcriptional regulator	1.60291	0.671926	0.981851	0.848688	1.14985	1.05104	0.354888	33.7653	5		0.919942	1.32183	0.9753	0.757273	0.8821	0.97129	0.211714	21.7972	5		0.924119	0.679958	b2869
	b2639			1.78117	0.722587	1.62161	1.57131	0.909679	1.32127	0.472245	35.7417	5		0.935229			1.34232	1.38594	1.22116	0.248585	20.3564	3		0.924233	0.708586	b2639
	b3586	yiaV	membrane fusion protein (MFP) component of efflux pump, signal anchor	0.667515	0.698316	2.00901	0.793857	1.12612	1.05896	0.561399	53.014	5		0.387173	1.14028	1.53804		0.850977	0.979119	0.484833	49.5173	4		0.924601	0.825653	b3586
	b1455	yncH	predicted protein		1.68768		1.35653	1.17535	1.40652	0.259801	18.4711	3		1.57041	1.11475	1.37814	1.1414		1.30118	0.215014	16.5246	4		0.925102	0.59941	b1455
	b4400	creD	inner membrane protein	2.04827	0.754221	0.991059	1.58533	1.06946	1.28967	0.521356	40.4256	5		0.838484	1.43735	1.44047	1.41352	0.838014	1.19357	0.324527	27.1897	5		0.925484	0.737148	b4400
	b3542	dppC	dipeptide transporter	0.549703	0.455593	0.878452	1.04531	0.83847	0.753506	0.244064	32.3905	5		0.837601	0.698054	0.565598	0.975324	0.411961	0.697708	0.221215	31.706	5		0.925948	0.7148	b3542
	b3728	pstS	phosphate transporter subunit		1.4887	0.740295	1.47141	0.836366	1.13419	0.401349	35.3864	4		1.40114	1.19701	0.944212	0.926949	0.783525	1.05057	0.246095	23.425	5		0.926269	0.730521	b3728
	b3859	rdoA	Thr/Ser kinase implicated in Cpx stress response	0.715895	1.31806		1.79072	1.16764	1.24808	0.443111	35.5035	4		1.95715	0.730212	0.794676	0.930129	1.3704	1.15651	0.512511	44.3152	5		0.926634	0.782344	b3859
	b0591	entS	predicted transporter	1.33842	1.03345	0.791732	1.17673	1.08085	1.08423	0.200819	18.5217	5		1.11428	0.957186		1.05595	0.891657	1.00477	0.0994499	9.89779	4		0.926708	0.467948	b0591
	b1389	paaB	predicted multicomponent oxygenase/reductase subunit for phenylacetic acid degradation		1.30121	1.50588	1.52977	1.32072	1.41439	0.120095	8.49094	4		1.82434	0.991392	3.54334	1.11671		1.31081	0.449121	34.2628	4		0.926766	0.496467	b1389
	b2713	hydN	formate dehydrogenase-H, [4Fe-4S] ferredoxin subunit	1.35891	0.481822	1.13746	1.39177	0.89848	1.05369	0.376032	35.6872	5		0.934105	1.04462	1.26181	0.945031	0.699848	0.977084	0.203327	20.8095	5		0.927299	0.702181	b2713
	b3362	yhfG	predicted protein	0.685117			0.496722	1.09781	0.759883	0.30744	40.4589	3		0.602293	0.822166		0.689727		0.704729	0.110701	15.7083	3		0.927417	0.79247	b3362
	b1996	insD	KpLE2 phage-like element; IS2 insertion element transposase InsAB'	1.39048	0.940571	1.83346	1.13021	0.619875	1.18292	0.45957	38.8505	5				1.68448	0.733829	0.873095	1.09713	0.513398	46.7944	3		0.927479	0.823888	b1996
	b4147	efp	Elongation factor EF-P	1.10485	1.38581	1.24575	0.697096	1.00503	1.08771	0.261511	24.0424	5		1.26853	0.837366	0.879286	0.933998	1.12599	1.00903	0.182313	18.0681	5		0.92767	0.597888	b4147
	b1309	ycjM	predicted glucosyltransferase	1.57132	0.862409		1.32072	1.00224	1.18917	0.318885	26.8157	4		0.960882	32.1345	1.33979	1.20925	0.903362	1.10332	0.206082	18.6784	5		0.927806	0.37999	b1309
	b2193	narP	DNA-binding response regulator in two-component regulatory system with NarQ or NarX	0.610464	1.01981	0.49734	0.644594	0.929715	0.740384	0.223074	30.1295	5			0.592712	0.583636		0.884652	0.687	0.171232	24.9246	3		0.927897	0.71846	b2193
	b3233	yhcB	conserved protein	0.484402		0.55821	0.432568	1.02114	0.62408	0.269681	43.2125	4		0.693974	0.426256	0.56545	0.51918	0.690613	0.579095	0.114858	19.834	5		0.927917	0.771278	b3233
	b0009	mog	predicted molybdochelatase	0.601581	1.23718	0.5705	0.578917	0.759581	0.749553	0.283265	37.7912	5		0.692036	0.803405		0.606394	0.680487	0.69558	0.0812831	11.6856	4		0.927994	0.702428	b0009
	b2538	hcaE	3-phenylpropionate dioxygenase, large (alpha) subunit	1.26611	0.437419	0.497005	1.73916	0.571233	0.902185	0.575037	63.7383	5		1.0066			1.03125	0.474022	0.83729	0.314841	37.6024	3		0.928069	0.843553	b2538
	b1649	ydhM	predicted DNA-binding transcriptional regulator	1.50954		1.17859	1.30563	1.66715	1.41523	0.216313	15.2847	4		1.18152	1.20437	1.61385	1.49326	1.07423	1.31345	0.228637	17.4074	5		0.928081	0.516928	b1649
	b2717	hycI	protease involved in processing C-terminal end of HycE	1.03403		0.341006	0.805119	3.50008	0.726718	0.353101	48.5884	4		1.21066	0.50737	0.429666		0.55077	0.674616	0.360855	53.4905	4		0.928304	0.374931	b2717
	b0128	yadH	predicted transporter subunit: membrane component of ABC superfamily	0.899683	0.846648	1.09901	1.32142	0.921902	1.01773	0.194436	19.1049	5		0.65372	0.761279	1.0577	1.2039	1.04771	0.944862	0.228516	24.1851	5		0.928399	0.60225	b0128
	b2085	yegR	predicted protein	2.25953	0.9198	1.04401	1.85551	1.02645	1.42106	0.600193	42.2356	5		1.49912	1.29625		1.16653		1.32064	0.167631	12.6932	3		0.929331	0.739382	b2085
	b4224	chpS	antitoxin of the ChpB-ChpS toxin-antitoxin system	1.73047	0.91468	1.0604	1.92894	1.03988	1.33487	0.460525	34.4995	5		0.833269	1.48672	1.40197	0.988772	1.4932	1.24079	0.308123	24.8329	5		0.929516	0.715458	b4224
	b1788	yoaI	predicted protein	1.68237	1.80608	1.03883	1.27655	1.10445	1.38166	0.344955	24.9668	5		1.97655	1.21607	0.984418	0.960426		1.28437	0.475635	37.0326	4		0.929585	0.744532	b1788
	b3473	yhhS	predicted transporter	1.69836		0.970355		0.700112	1.12294	0.516322	45.9793	3				0.920906	1.07147	1.13964	1.044	0.111921	10.7204	3		0.929702	0.81813	b3473
	b0212	gloB	predicted hydroxyacylglutathione hydrolase	1.24426	1.34463	0.846118	0.945864	1.06242	1.08866	0.205937	18.9166	5		0.804287	1.50589		0.726421		1.0122	0.429316	42.4143	3		0.929765	0.794206	b0212
	b3626	rfaJ	UDP-D-glucose:(galactosyl)lipopolysaccharide glucosyltransferase	0.366324	0.441325	2.34432	1.347	9.33554	1.12474	0.927185	82.4354	5		0.118972	0.268441	1.51253		2.28326	1.0458	1.0348	98.9482	4		0.929814	0.375083	b3626
	b1437			1.20373	1.01209	0.614394	1.89929	0.662735	1.07845	0.520107	48.2274	5		1.04325	1.26361	1.00262	0.744638	0.960289	1.00288	0.185818	18.5284	5		0.92993	0.771967	b1437
	b0211	mltD	predicted membrane-bound lytic murein transglycosylase D	0.161159	0.807796	0.497639	0.208526	0.450848	0.329543	0.169282	51.3688	5			0.417536	0.319809	0.182237		0.306527	0.11821	38.5644	3		0.930159	0.412605	b0211
	b3291	mscL	mechanosensitive channel	0.877733	1.63583	2.13254	1.11558	1.00693	1.35372	0.521938	38.5557	5		0.849639	1.24752	1.68073			1.2593	0.41567	33.0082	3		0.930247	0.788719	b3291
	b2037	rfbX	predicted polisoprenol-linked O-antigen transporter	2.41541	1.13167	1.44556	1.42829	1.12385	1.50896	0.529822	35.1119	5		1.17416	1.626	1.3594	1.42032	1.44361	1.4047	0.162737	11.5852	5		0.930908	0.692391	b2037
	b1724	ydiZ	predicted protein	1.67386	1.73241		1.21814	1.1323	1.43918	0.307728	21.3822	4		1.27924		1.17376	1.90305	1.0034	1.33986	0.392283	29.2779	4		0.93099	0.704881	b1724
	b3452	ugpA	glycerol-3-phosphate transporter subunit	0.734143	0.429189	0.435811	1.18605	0.777193	0.712477	0.310534	43.5851	5		0.890619	0.65218	0.582625	0.814788	0.377797	0.663602	0.201721	30.398	5		0.9314	0.776615	b3452
	b1497	ydeM	conserved protein	3.85899	0.907491	1.72688	1.85699	1.15261	1.41099	0.45423	32.1922	5		0.894708	1.38196	1.44384	1.53776		1.31457	0.287141	21.843	4		0.93166	0.331176	b1497
	b2478	dapA	dihydrodipicolinate synthase	1.19603	0.602344	0.880773	0.625789	0.897842	0.840556	0.241936	28.7828	5		0.831116	0.6583	0.706681	0.926849	0.792647	0.783119	0.105446	13.4649	5		0.931668	0.645399	b2478
	b0838	yliJ	predicted glutathione S-transferase	1.19456	1.02953	1.00342	1.17071	1.18693	1.11703	0.0926584	8.29507	5		0.925481	1.30371	1.17331	1.0091	0.792055	1.04073	0.201776	19.388	5		0.931694	0.473314	b0838
	b3115	tdcD	propionate kinase/acetate kinase C, anaerobic	1.96793		2.09395	0.562232	0.637963	1.31552	0.828273	62.9618	4		0.935144	1.18168	1.22943	1.13317	1.65136	1.22616	0.262736	21.4276	5		0.932071	0.847106	b3115
	b1886	tar	methyl-accepting chemotaxis protein II	3.30923	1.1504	0.826653	1.5943	0.759183	1.08263	0.381463	35.2347	5		0.958348	1.05441		0.976094	1.04839	1.00931	0.0491989	4.8745	4		0.932273	0.331265	b1886
	b0293	matB	conserved protein	0.899985	0.695829	0.614526	1.27865	1.15359	0.928516	0.285832	30.7838	5		0.923143	0.852878	0.900501	0.812138	0.840087	0.865749	0.0452773	5.22984	5		0.9324	0.651901	b0293
	b3518	yhjA	predicted cytochrome C peroxidase	0.739317	0.624099	0.933847	1.29118	0.877162	0.893121	0.253175	28.3472	5		0.625146	1.21842	0.766245	1.00297	0.551063	0.832768	0.275945	33.1359	5		0.932425	0.727972	b3518
	b0258			1.63774	7.37854	1.01605	1.15252	0.875253	1.17039	0.331491	28.3232	5		0.660675	1.39304	1.43831	0.970859	0.994784	1.09153	0.324316	29.7119	5		0.932624	0.351191	b0258
	b1612	fumA	fumarate hydratase (fumarase A), aerobic Class I	1.92094	0.967484	1.35107		1.16366	1.35079	0.4111	30.4341	4		0.834401	1.17181	1.60168	0.998251	1.69545	1.26032	0.37543	29.7885	5		0.933025	0.744366	b1612
	b0236			1.25916	0.640093	1.61472	2.21958	1.04016	1.35474	0.598822	44.2019	5		1.33878	1.4334		1.0212		1.26446	0.215919	17.076	3		0.933358	0.77129	b0236
	b1974	yodB	predicted cytochrome	3.52876		1.61778		1.52566	2.22407	1.13084	50.8456	3		1.58347	1.82373		1.75002	3.14873	2.07649	0.721857	34.7634	4		0.933644	0.855056	b1974
	b2578	eamB	neutral amino-acid efflux system	1.51887			1.04603	0.975838	1.18024	0.295348	25.0243	3		2.57927	0.769556	0.774336	0.968865	0.423435	1.10309	0.848291	76.9011	5		0.934632	0.859682	b2578
	b1703	ydiA	conserved protein		1.50124	1.11697		1.04512	1.22111	0.245244	20.0837	3		1.03805	1.08054	1.14025	1.26331	1.19191	1.14281	0.0891497	7.80089	5		0.935881	0.64113	b1703
	b1340	ydaL	conserved protein	0.509929	1.49105	0.68624	1.08417	0.907449	0.935768	0.379066	40.5086	5		0.812552	0.841103	1.13167	0.722916	0.870834	0.875814	0.153354	17.5099	5		0.935931	0.755641	b1340
	b3819	rarD	predicted chloramphenical resistance permease	0.376624	0.338633	0.386539	0.415938	1.03619	0.510785	0.295009	57.756	5			0.471553	0.37822	0.45159	0.611002	0.478091	0.0972705	20.3456	4		0.935993	0.825292	b3819
	b1523	yneG	conserved protein	0.820363	1.37015		0.874726	0.904244	0.992371	0.254239	25.6193	4		0.986823	0.994631	0.982241	0.762692	0.918141	0.928906	0.0978029	10.5288	5		0.936047	0.663253	b1523
	b0117	yacH	predicted protein	1.13238	0.624683	0.742885	0.429201	0.67359	0.720548	0.258061	35.8145	5		0.344394	0.969227	0.661333	0.847217	0.550186	0.674471	0.245608	36.4148	5		0.936054	0.779798	b0117
	b1908	yecA	conserved metal-binding protein	0.541001	0.768851	0.65302	0.508758	1.01703	0.697733	0.205723	29.4844	5		0.64819	0.479577	0.661069	0.683988	0.792767	0.653118	0.112538	17.2308	5		0.936058	0.684898	b1908
	b3884	yihW	predicted DNA-binding transcriptional regulator	1.16557	1.01826	1.05982		0.848821	1.02312	0.131711	12.8735	4		1.00868			0.869809	0.994865	0.957786	0.0765032	7.9875	3		0.936145	0.448696	b3884
	b1985	yeeO	predicted multidrug efflux system	0.591593		0.654005		2.76405	0.622799	0.0441319	7.08607	3		0.529702	0.605103	0.341422	0.54364	0.895402	0.583054	0.20052	34.3914	5		0.936183	0.402044	b1985
	b2940	yqgC	predicted protein	0.98984	0.810835	0.587143	1.51525	1.09472	0.999558	0.346697	34.685	5		0.955452	0.710646	1.21117	0.865829		0.935775	0.209608	22.3994	4		0.936188	0.743763	b2940
	b2651			2.0432	1.1912	1.12378	1.96021	1.02093	1.46786	0.49196	33.5154	5			1.7452	1.37033	1.13613	1.24574	1.37435	0.265101	19.2893	4		0.936292	0.727673	b2651
	b4103			7.42793	0.887846	1.33774	1.52733	0.980884	1.18345	0.300264	25.3719	5		0.786195	1.26659	1.43863	0.800576	1.24883	1.10816	0.296802	26.7832	5		0.936384	0.35182	b4103
	b1812	pabB	aminodeoxychorismate synthase, subunit I	1.04905		0.66101	0.530567	1.32887	0.892375	0.364927	40.8938	4		1.01482	0.653494	0.925734	0.748758		0.835701	0.164263	19.6557	4		0.93649	0.79051	b1812
	b2395	yfeA	predicted diguanylate cyclase	0.802284	0.511916	0.380999	1.49728	1.00272	0.839039	0.441087	52.5705	5		0.889776		0.748391	0.619037	0.887411	0.786154	0.129543	16.4781	4		0.93697	0.809421	b2395
	b1803	yeaX	predicted oxidoreductase	0.66319	0.60199	1.26754	0.348268	1.10044	0.796286	0.377749	47.4389	5		0.424047		0.640707		1.17404	0.746265	0.385978	51.7214	3		0.937182	0.866229	b1803
	b2971	yghG	predicted protein	1.7179	1.00794	1.12771	1.58118	0.971453	1.28124	0.344553	26.8922	5		0.998049	1.40235	1.30484	1.08802	1.21188	1.20103	0.162323	13.5153	5		0.937396	0.655211	b2971
	b0320	yahF	predicted acyl-CoA synthetase with NAD(P)-binding domain and succinyl-CoA synthetase domain		1.6705		0.759632	0.953043	1.12773	0.479904	42.555	3				1.06435	1.24517	0.86345	1.05766	0.190949	18.054	3		0.937866	0.831379	b0320
	b0467	priC	primosomal replication protein N''	0.693566	0.870976	0.673583	1.276	0.799395	0.862704	0.244574	28.3497	5			0.965266	0.556889	1.04466	0.670627	0.809361	0.232854	28.77	4		0.938168	0.748625	b0467
	b3397	nudE	ADP-ribose diphosphatase	0.174613		0.365159	0.250056	0.452326	0.310539	0.122775	39.5361	4		0.385197	0.192244	0.368379	0.171826	0.339181	0.291365	0.101411	34.8054	5		0.938258	0.810228	b3397
	b3419			0.483779	0.514169	0.351539	0.402286	0.861021	0.522559	0.199903	38.2546	5		0.501939	0.57758	0.398768		0.483243	0.490382	0.0734421	14.9765	4		0.938425	0.75204	b3419
	b4280	yjhC	KpLE2 phage-like element; predicted oxidoreductase	1.4641	1.7763	1.72066	1.32248	1.08327	1.47336	0.286334	19.434	5		0.847983	2.49095	1.55263	1.00364	1.02174	1.38339	0.673979	48.7195	5		0.938932	0.79372	b4280
	b1307	pspD	peripheral inner membrane phage-shock protein	1.83164	0.882993	1.41605	1.92333	1.02955	1.41671	0.464644	32.7974	5		0.957731	1.49193	1.47048	1.3579	1.37662	1.33093	0.216499	16.2667	5		0.939452	0.721889	b1307
	b0636	ybeA	conserved protein	0.492823		0.511785	1.31244	0.889177	0.801555	0.38642	48.2087	4		0.939289	0.61465		0.705493		0.753144	0.167483	22.2379	3		0.939603	0.832981	b0636
	b3612	gpmM	phosphoglycero mutase III, cofactor-independent	2.02247	0.731049	0.924117	1.42597	0.84604	1.18993	0.5358	45.0279	5		0.920363	1.84651	1.0754	1.06863	0.683433	1.11887	0.436717	39.0321	5		0.94028	0.824182	b3612
	b1327	ycjY	predicted hydrolase	2.09224	2.13715	1.05873	1.35224	1.35652	1.59937	0.485921	30.382	5		2.60199	1.05781	1.21509		1.1406	1.50387	0.734891	48.8666	4		0.940288	0.831823	b1327
	b3408	feoA	ferrous iron transporter, protein A	0.789861	0.903858	1.36674	1.02187	1.13477	1.04342	0.221988	21.2751	5		0.816316	0.934004	0.989727	1.12286	1.04297	0.981175	0.11551	11.7727	5		0.940347	0.598143	b3408
	b0818	ybiR	predicted transporter	0.363615	0.662298	0.933418	0.223738	1.15508	0.66763	0.38657	57.9018	5		0.310583	0.618623	0.697053	0.695082	0.817698	0.627808	0.191112	30.4411	5		0.940352	0.843411	b0818
	b3986	rplL	50S ribosomal subunit protein L7/L12	0.378229	1.17166	0.797899	0.352162	0.960865	0.732163	0.360365	49.2193	5		0.759761		0.681428		0.624447	0.688545	0.0679376	9.86683	3		0.940427	0.804291	b3986
	b3682			0.702724	1.44457	0.489836	1.14267	0.981188	0.952198	0.372681	39.139	5		1.08245	0.891081	0.834822	1.03671	0.633797	0.895772	0.178242	19.8981	5		0.940741	0.77082	b3682
	b1559	ydfT	Qin prophage; predicted antitermination protein Q	2.05556	0.787132	1.60859	1.69777	0.883263	1.40646	0.548715	39.0138	5		1.01963	1.68392	1.2925	1.04386	1.57622	1.32322	0.302187	22.8372	5		0.940818	0.776043	b1559
	b3948			0.612146		0.564631	0.713605	0.814527	0.676227	0.111182	16.4415	4		0.580982	0.50015	0.628863	0.835096		0.636273	0.142796	22.4426	4		0.940916	0.675184	b3948
	b3339	tufA	protein chain elongation factor EF-Tu (duplicate of tufB)	0.749688	0.908271	0.534562	0.865633	0.922572	0.796145	0.161221	20.2501	5		1.08563	0.75428	0.52377	0.810685	0.572657	0.749404	0.223033	29.7614	5		0.94129	0.714939	b3339
	b0379	yaiY	predicted inner membrane protein	0.80224	1.06144		1.21983	1.05306	1.03414	0.172589	16.6891	4		0.438		1.55067	0.827934	1.07855	0.973788	0.466229	47.8779	4		0.941641	0.820683	b0379
	b0013	yaaI	predicted protein			0.920782	0.535827	1.02678	0.827796	0.258347	31.209	3		0.371989		1.05406	0.714059	0.978028	0.779534	0.308298	39.549	4		0.941698	0.831134	b0013
	b1205	ychH	predicted inner membrane protein		1.37694		1.04065	0.952777	1.12346	0.22388	19.9278	3		0.97256	0.954581	1.18163	0.968003	1.21383	1.05812	0.128122	12.1084	5		0.941843	0.67742	b1205
	b2439	eutL	predicted carboxysome structural protein with predicted role in ethanolamine utilization	1.27527	0.889231	0.509807		0.957933	0.908061	0.314268	34.6087	4		1.03151	0.837113	0.697403		0.856885	0.855727	0.137008	16.0107	4		0.942368	0.775011	b2439
	b1148	ymfM	e14 prophage; predicted protein		1.38861	1.60367	1.08744	1.22013	1.32496	0.22296	16.8276	4		0.836931	1.49249	1.38597	0.925741	1.60229	1.24869	0.345385	27.6599	5		0.94243	0.70113	b1148
	b2471	yffB	conserved protein	13.6252	1.26189	1.8119	1.72634	1.18465	1.49619	0.318638	21.2966	5		1.69476		1.31191	1.22435		1.41034	0.250173	17.7385	3		0.942618	0.359905	b2471
	b2458	eutD	predicted phosphotransacetylase subunit	1.6224	0.692768	1.49568		0.92537	1.18405	0.446293	37.692	4		0.950417	1.44024	1.37677	3.37312	0.697826	1.11631	0.35375	31.6892	5		0.94279	0.491785	b2458
	b4074	nrfE	heme lyase (NrfEFG) for insertion of heme into c552, subunit NrfE	0.634199	0.42142	0.423555	0.575824	0.755666	0.562133	0.143038	25.4457	5		0.854745		0.37877		0.356656	0.530057	0.281406	53.0897	3		0.942939	0.867448	b4074
	b0226	dinJ	predicted antitoxin of YafQ-DinJ toxin-antitoxin system	1.69166	1.14841	1.2547	0.433486	1.05139	1.11593	0.45323	40.6147	5		1.33561	1.03941	0.951468	0.91292	1.0221	1.0523	0.166534	15.8257	5		0.942983	0.779968	b0226
	b3014	yqhH	predicted outer membrane lipoprotein	1.55972	1.13236	0.922433	1.37674	0.811638	1.16058	0.310366	26.7424	5		1.41953	0.923394	1.29015	0.904142	0.937664	1.09498	0.241886	22.0905	5		0.943474	0.719549	b3014
	b1820	yobD	conserved inner membrane protein			1.06216	1.20808	1.16678	1.14567	0.0752181	6.5654	3		0.904859	1.14012	1.18883	0.872323	1.30332	1.08189	0.186493	17.2377	5		0.944328	0.524435	b1820
	b3118	tdcA	DNA-binding transcriptional activator	1.61113	1.64157	1.54903	1.41238	1.05504	1.45383	0.239692	16.4869	5		1.17993	1.2916	1.41446	1.20551	1.77706	1.37371	0.243381	17.717	5		0.944894	0.614197	b3118
	b0080	fruR	DNA-binding transcriptional dual regulator	1.26213		2.34379	1.29243	1.20204	1.5251	0.547088	35.8723	4		1.68257	1.59323	1.49247	1.14647	1.29233	1.44141	0.219677	15.2404	5		0.945127	0.788506	b0080
	b2143	cdd	cytidine/deoxycytidine deaminase	0.575881	1.39917	0.487086	0.684045	0.662624	0.761761	0.364744	47.8817	5			0.734185	0.777319	0.804683	0.566492	0.72067	0.106803	14.82	4		0.946058	0.820618	b2143
	b1142			1.55009	1.06776	1.06802	1.72288	1.10698	1.30315	0.310778	23.8483	5		1.14771	1.2217	1.40922	1.00702	1.38627	1.23438	0.168082	13.6166	5		0.947235	0.678286	b1142
	b1556	essQ	Qin prophage; predicted S lysis protein	1.84407	1.85683	1.45514	1.16603	1.06559	1.47753	0.36927	24.9923	5		0.99681	2.45429	1.38882	0.922032	1.23611	1.39961	0.618371	44.1816	5		0.947263	0.816264	b1556
	b3226	nanR	DNA-binding transcriptional dual regulator	1.22503	0.99682	1.45921	1.54909	1.10081	1.26619	0.23393	18.4751	5		1.10681	1.11768	1.42306	1.07463	1.27743	1.19992	0.147417	12.2855	5		0.947664	0.609239	b3226
	b0514	glxK	glycerate kinase II	0.836969	1.22222	0.558153	0.567648	0.780889	0.793175	0.270298	34.0779	5		0.911755	0.792657		0.634543	0.668046	0.75175	0.126516	16.8295	4		0.947773	0.771828	b0514
	b3232	yhcM	conserved protein with nucleoside triphosphate hydrolase domain	0.535109	1.13232	0.398006	0.407979	0.621687	0.619021	0.301627	48.7264	5		0.735742	0.50345	0.540879	0.505422	0.648274	0.586753	0.102031	17.389	5		0.947873	0.829878	b3232
	b0141	yadN	predicted fimbrial-like adhesin protein	4.2361	0.738506	1.25691	1.36913	0.877357	1.06048	0.300584	28.3442	5		0.98055	0.955708	0.998263	1.01718	1.08027	1.00639	0.0471107	4.68114	5		0.949002	0.346052	b0141
	b2720	hycF	formate hydrogenlyase complex iron-sulfur protein	1.36058			3.99991	0.857967	1.10927	0.355402	32.0392	3		1.05366	0.992418	1.16347	1.13884	0.918361	1.05335	0.101698	9.65468	5		0.949585	0.405269	b2720
	b1916	sdiA	DNA-binding transcriptional activator	0.586064	1.06828	1.41816	1.32979	0.820038	1.04447	0.347177	33.2396	5		0.831437	0.832671	1.01585	0.960284	1.31902	0.991852	0.199801	20.1442	5		0.949625	0.778288	b1916
	b1067	yceH	conserved protein	1.70395		0.761656	0.918346	1.26614	1.16252	0.418008	35.957	4		0.769151	1.17896	0.925143	1.37345	1.2759	1.10452	0.25094	22.7193	5		0.950107	0.817186	b1067
	b1066	rimJ	ribosomal-protein-S5-alanine N-acetyltransferase	0.925307	0.485664	1.52932	0.66482	1.01393	0.923809	0.398063	43.0893	5		0.68058	1.14034	0.81255			0.877824	0.236729	26.9677	3		0.950222	0.844469	b1066
	b0700	rhsC	rhsC element core protein RshC	5.19034		0.757186	1.04208	1.05556	0.95161	0.168511	17.708	4		1.08718	0.928954	0.899152	0.975392	0.630761	0.904288	0.168787	18.6652	5		0.950271	0.374163	b0700
	b0123	cueO	multicopper oxidase (laccase)	0.665908	0.865591			1.18705	0.906184	0.262934	29.0155	3		0.482246	1.02315	0.727467	1.16429	0.910115	0.861455	0.265507	30.8208	5		0.950639	0.826923	b0123
	b0853	ybjN	predicted oxidoreductase	1.02723	1.20597	1.64584	1.76914	0.974702	1.32458	0.362538	27.3701	5		0.926305	1.14918	1.44948	1.25771	1.51341	1.25922	0.236513	18.7826	5		0.950656	0.745705	b0853
	b1484	ddpD	D-ala-D-ala transporter subunit	1.84862	0.993802	0.811602	1.33352	0.831431	1.1638	0.436234	37.4837	5		1.05704	1.19518	1.11671	1.16171	1.00372	1.10687	0.0775	7.00171	5		0.951087	0.787351	b1484
	b3454	livF	leucine/isoleucine/valine transporter subunit	0.198617	0.261397	1.28485	0.151624	1.28256	0.63581	0.592728	93.2239	5			0.511658	0.501222	0.802626		0.605169	0.171083	28.2702	3		0.951807	0.917958	b3454
	b1419	ydcA	predicted protein	3.7241	1.59611	0.838425	0.963806	0.961974	1.09008	0.342417	31.4122	5		1.10272	1.0582	1.17099	0.818888		1.0377	0.153073	14.7511	4		0.951951	0.348525	b1419
	b0374			0.403949	1.83614	0.773969	0.375269	1.06879	0.655493	0.329973	50.3397	5		0.478473	0.415224	0.774669		0.828838	0.624301	0.207706	33.2701	4		0.952414	0.394673	b0374
	b0147	ligT	2'-5' RNA ligase	0.954204	0.495953	0.899398	0.817111	0.943524	0.822038	0.19011	23.1266	5		0.719865	0.889464	0.737812	0.819679	0.748251	0.783014	0.070561	9.01146	5		0.952528	0.684605	b0147
	b4267	idnD	L-idonate 5-dehydrogenase, NAD-binding		0.557053	0.976282		0.989463	0.840933	0.245935	29.2455	3		0.545167	0.935216	0.932661	0.686835	0.906919	0.80136	0.176813	22.0641	5		0.952942	0.822091	b4267
	b2581	yfiF	predicted methyltransferase	0.930737			0.514406	1.42646	0.957202	0.456604	47.702	3		1.26932	0.770131	0.778858	0.881115	0.862872	0.912459	0.205484	22.5198	5		0.953256	0.884729	b2581
	b1337	abgB	predicted peptidase, aminobenzoyl-glutamate utilization protein	1.58536	0.928444	1.06031	1.56543	0.939355	1.21578	0.332411	27.3413	5		1.00454	1.17835	1.41434	1.07255	1.12762	1.15948	0.156434	13.4917	5		0.953692	0.74415	b1337
	b0477	gsk	inosine/guanosine kinase	32.7622		1.38127		1.39995	1.39061	0.0132104	0.949967	3			1.33429	1.04558		1.59955	1.32647	0.277063	20.8872	3		0.953877	0.420299	b0477
	b2788	gudX	predicted glucarate dehydratase	2.13931			5.91864	1.18234	1.66083	0.676682	40.7437	3			2.02223	1.52115		1.20929	1.58423	0.410123	25.8879	3		0.953878	0.409965	b2788
	b1334	fnr	DNA-binding transcriptional dual regulator, global regulator of anaerobic growth	2.37048	1.51557	1.22016	1.16466	1.19472	1.49312	0.51032	34.1781	5		0.693106	2.14808	1.68079	1.56637	1.03464	1.4246	0.569278	39.9607	5		0.954108	0.846219	b1334
	b3156	yhbS	predicted acyltransferase with acyl-CoA N-acyltransferase domain	0.449403	0.967378		0.846022	0.704857	0.741915	0.222567	29.999	4		1.05218	0.740815	0.690141	0.495087	0.561525	0.707949	0.21601	30.512	5		0.954219	0.824829	b3156
	b1762	ynjI	predicted inner membrane protein	1.38214		0.858709	1.27958	0.828648	1.08727	0.284638	26.1791	4		1.04211	1.01769		0.854602	1.23615	1.03764	0.156341	15.067	4		0.954353	0.773047	b1762
	b3908	sodA	superoxide dismutase, Mn	1.82219		1.12822	1.63424	1.42646	1.50278	0.297448	19.7932	4			1.36725	1.42513	1.8119	1.13257	1.43421	0.281781	19.6471	4		0.954375	0.749287	b3908
	b3471	yhhQ	conserved inner membrane protein	1.76525	0.880013	1.52402	1.01885	0.894657	1.21656	0.403599	33.1755	5		0.915492	1.29623	1.27267			1.16147	0.213344	18.3686	3		0.954715	0.809374	b3471
	b3779	gpp	guanosine pentaphosphatase/exopolyphosphatase	1.40708	0.811679	1.67316		0.887161	1.19477	0.414454	34.689	4		0.827336			1.39415	1.20152	1.141	0.288215	25.2597	3		0.954999	0.847656	b3779
	b1732	katE	hydroperoxidase HPII(III) (catalase)	0.67451	1.02186	1.41701	0.251282	1.20138	0.913209	0.459289	50.294	5		0.243646	1.07275	1.135	0.911438	0.998592	0.872286	0.361207	41.4092	5		0.955188	0.879648	b1732
	b0613	citG	triphosphoribosyl-dephospho-CoA transferase	0.770285	0.912801	0.626226	0.560736	0.914039	0.756817	0.161812	21.3806	5		0.98078	0.857334	0.501614	0.659247	0.616273	0.72305	0.192979	26.6895	5		0.955382	0.772184	b0613
	b3113	tdcF	predicted L-PSP (mRNA) endoribonuclease	1.0657	0.806714	0.630199	1.35826	1.04606	0.981388	0.277115	28.2371	5		0.973549	0.991022	0.986395	1.05987	0.67985	0.938137	0.148249	15.8025	5		0.955929	0.768499	b3113
	b2033	wbbJ	predicted acyl transferase			1.48625	1.21433	4.71222	1.35029	0.192274	14.2395	3		0.969796	1.43249	1.70646	1.02343	1.32313	1.29106	0.303488	23.5069	5		0.956139	0.403894	b2033
	b0488	ybbJ	conserved inner membrane protein	1.36344	1.54628	0.489234	0.800124	0.852681	1.01035	0.433735	42.9291	5		0.954662	1.00592	0.889054	0.990464	0.99452	0.966925	0.0475675	4.91946	5		0.957019	0.83455	b0488
	b2623	yfjH	CP4-57 prophage; predicted protein	1.2365	0.997038	1.28147	0.895839	0.849031	1.05198	0.19704	18.7305	5		0.722416	1.01224		1.08825	1.20476	1.00691	0.205527	20.4116	4		0.957165	0.74982	b2623
	b1424	mdoD	glucan biosynthesis protein, periplasmic	1.36836	0.579455	1.2937	1.19419	1.20018	1.12718	0.314531	27.9043	5		0.787649	1.13744	1.16847	1.23424	1.06919	1.0794	0.173566	16.0798	5		0.957613	0.775838	b1424
	b2928	yggC	conserved protein with nucleoside triphosphate hydrolase domain	0.800407	0.541724	0.331354		0.934605	0.652023	0.268865	41.2355	4			0.713647	0.693923	0.532961	0.557973	0.624626	0.0923257	14.781	4		0.957982	0.857275	b2928
	b2825	ppdB	conserved protein	0.77593	0.454833	0.743366	0.3996	0.951271	0.665	0.231843	34.8637	5		0.477705	0.683665	0.672883		0.715248	0.637375	0.107954	16.9373	4		0.958459	0.821189	b2825
	b3219	yhcF	predicted transcriptional regulator		2.43402		1.00079	0.959405	1.46474	0.839678	57.3262	3		2.11435			0.767591	1.32976	1.4039	0.676434	48.1825	3		0.958466	0.927055	b3219
	b3068	mug	G/U mismatch-specific DNA glycosylase	0.554989	1.55597	0.667385	0.665424	1.00563	0.88988	0.408997	45.9609	5		0.876589	0.861057	0.787506	0.981968	0.759227	0.853269	0.087087	10.2063	5		0.958859	0.853579	b3068
	b1112	bhsA	predicted protein	1.72794	0.599667	0.830907	1.78784	1.08227	1.20573	0.532591	44.1718	5		0.895998	1.42062	1.45937	0.816746	1.19241	1.15703	0.29414	25.422	5		0.959612	0.863636	b1112
	b1788	yoaI	predicted protein	1.53777	0.790648	1.16633	1.34447	1.02921	1.17368	0.286954	24.449	5		0.872529	1.34525	1.07901	1.07789	1.25918	1.12677	0.183421	16.2785	5		0.96003	0.76729	b1788
	b1588	ynfF	oxidoreductase subunit		1.29371	1.71554	1.51557	0.930751	1.36389	0.336253	24.6539	4		1.55213	1.65097		0.907029	1.12759	1.30943	0.351448	26.8398	4		0.960068	0.830245	b1588
	b0725			1.40687	0.682069	0.873464	0.941656	0.895117	0.959836	0.268783	28.003	5		0.858973	0.861151	1.0235	0.895399	0.970341	0.921872	0.0724934	7.86372	5		0.960448	0.773786	b0725
	b3062	ttdB	L-tartrate dehydratase, beta subunit	1.79442	1.06745	1.45538	5.20413	0.901698	1.30473	0.40051	30.6967	5		1.49459	1.04097	1.55023	1.11445	1.06908	1.25386	0.247329	19.7253	5		0.961011	0.357191	b3062
	b1347	ydaC	Rac prophage; predicted protein		0.812052	1.57023	1.02582	0.918392	1.08162	0.337224	31.1776	4		0.412955	0.403362	1.8492	0.628073	1.90462	1.03964	0.769829	74.0475	5		0.961187	0.916544	b1347
	b0894	dmsA	dimethyl sulfoxide reductase, anaerobic, subunit A		1.59713	1.19819	1.06209	1.13847	1.24897	0.238698	19.1115	4		1.17241		1.37912	1.05303		1.20152	0.164982	13.7311	3		0.962007	0.76853	b0894
	b3875	ompL	predicted outer membrane porin L	1.06724	0.776632	1.35866	1.5515	1.13993	1.17879	0.294512	24.9842	5				1.17918	0.533736	1.69024	1.13439	0.579552	51.0895	3		0.962331	0.910523	b3875
	b0963	mgsA	methylglyoxal synthase	1.64438	0.821477	0.857814	1.75502	1.15411	1.24656	0.435075	34.902	5				1.51531	1.09077	0.994516	1.2002	0.277105	23.0882	3		0.962809	0.86017	b0963
	b3535	yhjR	conserved protein		1.1768	1.34232	1.66255	1.21789	1.34989	0.219999	16.2976	4		1.36166	1.23531	1.24014	1.39595	1.26628	1.29987	0.0740148	5.69402	5		0.962943	0.688399	b3535
	b2823	ppdC	predicted protein	0.853067		0.791275	1.38416	1.078	1.02663	0.268317	26.1358	4		1.27096	0.680526	1.04586	1.02241	0.92365	0.988681	0.214055	21.6505	5		0.963039	0.825919	b2823
	b1590	ynfH	oxidoreductase, membrane subunit	1.52727	0.973084	1.72832	1.63825	1.00924	1.37523	0.357992	26.0314	5		0.993314	1.18553	1.29742	1.24409	1.90437	1.32494	0.343672	25.9386	5		0.963433	0.826433	b1590
	b1263	trpD	fused glutamine amidotransferase (component II) of anthranilate synthase/anthranilate phosphoribosyl transferase	1.49895	0.471057	0.39654	1.17538	0.942277	0.896841	0.467381	52.1141	5			0.967321		0.904286	0.720921	0.864176	0.128003	14.8122	3		0.963578	0.888723	b1263
	b4403	yjtD	predicted rRNA methyltransferase	0.619613	0.700048	0.764048	1.34854	0.915597	0.86957	0.288914	33.2249	5		0.793215	0.833424	0.84446	0.83461	0.88408	0.837958	0.0324162	3.86847	5		0.963647	0.81958	b4403
	b3975			0.228395			0.478418	0.862409	0.523074	0.319357	61.0539	3		0.307067	0.332559	0.398087	0.643046	0.839861	0.504124	0.229961	45.616	5		0.963771	0.933684	b3975
	b0800	ybiB	predicted transferase/phosphorylase			1.52215	0.796174	1.52819	1.28217	0.420896	32.8268	3		0.770731	1.26993	1.38763	1.13443	1.61808	1.23616	0.315007	25.4827	5		0.964114	0.879199	b0800
	b1851	edd	6-phosphogluconate dehydratase	1.11539	0.42532	0.999152	0.675541	1.0429	0.851661	0.291832	34.2663	5		0.114285	0.261977	1.09484		1.81591	0.821751	0.790943	96.251	4		0.964881	0.946499	b1851
	b0044	fixX	predicted 4Fe-4S ferredoxin-type protein	1.19426	1.17568	1.60113	1.72066	0.889284	1.3162	0.339725	25.8109	5		0.984697	1.89433	1.28526	1.27033	0.917351	1.27039	0.385933	30.379	5		0.965195	0.84713	b0044
	b0226	dinJ	predicted antitoxin of YafQ-DinJ toxin-antitoxin system	4.67911		0.949094	1.22229	0.918296	1.02989	0.167331	16.2474	4		0.842855	1.20476	0.961841	1.12073	0.840282	0.994095	0.16431	16.5286	5		0.96524	0.3767	b0226
	b4054	tyrB	tyrosine aminotransferase, tyrosine-repressible, PLP-dependent		1.2484	0.3771	0.840446	1.20271	0.917166	0.403655	44.0111	4			0.905441	0.885165	0.882041	0.869044	0.885423	0.015061	1.70099	4		0.965391	0.88507	b4054
	b3057	bacA	undecaprenyl pyrophosphate phosphatase	0.627658		0.795326	1.16897	0.864667	0.864156	0.226262	26.183	4		0.856957	0.629714	0.757244	1.00617	0.92455	0.834927	0.14662	17.5608	5		0.966176	0.832078	b3057
	b4379	yjjW	predicted pyruvate formate lyase activating enzyme	1.21841		1.04071	0.637355	0.8681	0.941142	0.247932	26.3437	4		0.529861	1.27182	1.17762	1.06701	0.503091	0.909879	0.366492	40.2792	5		0.966782	0.883447	b4379
	b1118	lolE	outer membrane-specific lipoprotein transporter subunit	1.60014	0.574561	1.28669	1.3962	0.827711	1.13706	0.42311	37.2109	5		0.767839	8.81114	1.42839		1.10271	1.09964	0.330284	30.0355	4		0.967094	0.400859	b1118
	b3304	rplR	50S ribosomal subunit protein L18	0.424187	1.19737	0.923498	0.275348	0.765681	0.717216	0.373015	52.0087	5			0.698337		0.689486	2.11078	0.693911	0.0062583	0.901887	3		0.967506	0.447581	b3304
	b1308	pspE	thiosulfate:cyanide sulfurtransferase (rhodanese)	1.2035	1.4042	1.32842	1.85465	0.996079	1.35737	0.318011	23.4285	5		1.20063		1.37647	1.12789	1.54822	1.3133	0.18819	14.3295	4		0.967536	0.803979	b1308
	b0166	dapD	2,3,4,5-tetrahydropyridine-2-carboxylate N-succinyltransferase	1.45963	6.50065	1.09992	0.834243	1.54833	1.23553	0.330398	26.7414	5		722.072	1.51116	1.20064	0.902365	1.16759	1.19544	0.249248	20.8499	5		0.96755	0.377174	b0166
	b4202	rpsR	30S ribosomal subunit protein S18	0.276719	0.677621	0.273216	0.275852	0.777849	0.456251	0.250353	54.8718	5		0.472355	0.350658	0.455412	0.511961	0.417114	0.4415	0.06115	13.8505	5		0.967668	0.903705	b4202
	b0865	ybjP	predicted lipoprotein	1.30944	0.625846		1.58448	1.02442	1.13605	0.409846	36.0765	4		1.21236	1.07149	1.34753	0.855588	1.01198	1.09979	0.188543	17.1435	5		0.968087	0.877943	b0865
	b2060	wzc	protein-tyrosine kinase			0.746231	1.33405	1.42696	1.16908	0.369134	31.5747	3		3.87687	1.39342	0.930677	1.21039	0.993892	1.1321	0.211418	18.6749	5		0.968363	0.428178	b2060
	b1056	yceI	predicted protein	1.29564	1.54123	1.36567	1.5988	1.23993	1.40825	0.155578	11.0476	5			1.19823	1.39518	1.49787		1.36376	0.152271	11.1655	3		0.968409	0.709919	b1056
	b3662	nepI	predicted transporter	2.41935	0.645917	1.57111		0.924218	1.39015	0.788032	56.6868	4		1.09181	1.46852	1.07654	1.74995		1.3467	0.324244	24.0768	4		0.968748	0.923704	b3662
	b0348	mhpB	2,3-dihydroxyphenylpropionate 1,2-dioxygenase	0.504941	1.04221	0.882163	1.50929	0.957942	0.979309	0.360471	36.8087	5		0.847935	1.35476	0.847229	1.08728	0.608716	0.949183	0.282897	29.8043	5		0.969237	0.886961	b0348
	b1036	ycdZ	predicted inner membrane protein	0.420121		0.550567	0.53944	0.709712	0.55496	0.11887	21.4195	4		0.604945	0.433593	0.532175	0.582229	0.536618	0.537912	0.0659063	12.2522	5		0.969281	0.80864	b1036
	b1846	yebE	conserved protein	0.789729	0.696935	0.708245	1.09479	1.0096	0.859862	0.181705	21.1319	5		0.965964	0.815302	0.731787	0.836744	0.81759	0.833477	0.0843907	10.1251	5		0.969316	0.778914	b1846
	b3928	yiiU	conserved protein	1.22848	0.960889			1.05795	1.08244	0.135468	12.515	3		0.902676	1.02202	1.31883	0.956426		1.04999	0.185755	17.6912	4		0.97002	0.799949	b3928
	b1641	slyB	outer membrane lipoprotein	1.7086	6.39737	1.83193	0.916328	1.29914	1.439	0.416265	28.9273	5		1.20999	1.26363	1.35093		1.76132	1.39646	0.250073	17.9076	4		0.97044	0.363158	b1641
	b2152	yeiB	conserved inner membrane protein	1.22051	0.477709	0.886452	1.49506	1.01503	1.01895	0.380073	37.3004	5			1.21478		0.885596	0.868367	0.989579	0.195215	19.7271	3		0.971173	0.890214	b2152
	b2101	yegW	predicted DNA-binding transcriptional regulator	0.690975	0.840513	0.763786	0.683338	1.12512	0.820747	0.18166	22.1336	5		0.903837			0.637024	0.850414	0.797092	0.141173	17.711	3		0.971178	0.844772	b2101
	b1758	ynjF	predicted phosphatidyl transferase, inner membrane protein	0.383636	1.87724	0.945434	0.44124	0.80226	0.643142	0.273744	42.5635	5		0.538325	0.822703	0.508117	0.585878	0.668476	0.6247	0.126176	20.1978	5		0.971324	0.384428	b1758
	b3349	slyD	FKBP-type peptidyl prolyl cis-trans isomerase (rotamase)			1.03274	11.9545	0.862852	0.947794	0.120125	12.6742	3			1.14177	0.886091		0.734109	0.920657	0.206017	22.3772	3		0.971368	0.41986	b3349
	b3746	ravA	fused predicted transcriptional regulator: sigma54 activator protein/conserved protein	0.57851	0.545629		0.254999	0.588503	0.49191	0.158999	32.3228	4		0.554632	0.489658	0.389204			0.477831	0.0833455	17.4424	3		0.971379	0.885915	b3746
	b2630	rnlA	CP4-57 prophage; RNase LS	1.16914		1.98635	1.83014	0.948732	1.48359	0.502598	33.8771	4		1.7373	1.25717	1.43577	1.78249	0.994343	1.44141	0.330805	22.95	5		0.971572	0.890662	b2630
	b1565	ydfV	Qin prophage; predicted protein	3.43108	1.07716	0.917688	1.7918	1.06157	1.21205	0.393108	32.4332	5		0.932007	1.08647	1.63435	1.05808		1.17773	0.311732	26.4689	4		0.971677	0.379189	b1565
	b3991	thiG	thiamin biosynthesis ThiGH complex subunit	0.91394		0.381774	0.657395	0.897809	0.71273	0.249889	35.0608	4		0.708277	0.739311	0.609305		0.713744	0.692659	0.0571923	8.25692	4		0.97184	0.884633	b3991
	b0344	lacZ	beta-D-galactosidase	1.23986	0.825993	0.984387	1.61232	0.903826	1.11328	0.319405	28.6905	5		0.994219	1.00923	1.16195	1.35069	0.896262	1.08247	0.177541	16.4015	5		0.972328	0.856446	b0344
	b3635	mutM	formamidopyrimidine/5-formyluracil/ 5-hydroxymethyluracil DNA glycosylase	1.22384	0.505636	0.879094	0.844354	0.885337	0.867652	0.254417	29.3224	5		0.805697	0.778822	1.01583	1.05526	0.565364	0.844194	0.198436	23.506	5		0.972964	0.875122	b3635
	b1655	ydhO	predicted lipoprotein	0.664991	1.28905	1.16439	0.463279	1.14844	0.946029	0.35998	38.0517	5		0.681202	0.816002	1.35596	0.828997		0.92054	0.29787	32.3582	4		0.973057	0.910756	b1655
	b0798	ybiA	conserved protein	1.51083	0.507905	0.978438	1.21435	0.865445	1.01539	0.376308	37.0604	5			1.31461	1.0955	0.828495	0.714102	0.988178	0.269997	27.3227	4		0.973199	0.903189	b0798
	b2140	dusC	tRNA-dihydrouridine synthase C	1.26064	0.730489	0.833291	1.82663	1.12957	1.15612	0.432029	37.3687	5		0.958355	1.24244	1.35556	1.20156	0.868963	1.12538	0.2038	18.1095	5		0.973405	0.890511	b2140
	b3244	tldD	predicted peptidase	0.877518	0.732031	0.482415	0.537645	0.777131	0.681348	0.166171	24.3885	5		0.920126	0.774127	0.42755		0.531519	0.663331	0.224489	33.8427	4		0.973557	0.898353	b3244
	b1700	ydiT	predicted 4Fe-4S ferredoxin-type protein		0.924945	1.38877	0.871135	1.02427	1.05228	0.233121	22.1539	4		1.0415			1.04661	0.985835	1.02465	0.0337079	3.28971	3		0.97374	0.829426	b1700
	b4397	creA	conserved protein	1.43674	1.07374	1.48124	1.3496	1.15359	1.29898	0.177925	13.6972	5		1.49327	1.20671	1.29325	1.34093	0.991368	1.2651	0.185029	14.6256	5		0.973918	0.775424	b4397
	b2267	elaA	predicted acyltransferase with acyl-CoA N-acyltransferase domain	1.14246	0.670508	0.818661	1.58605	1.15315	1.07417	0.353961	32.9521	5		0.875386	1.21839	0.957291	1.04216	1.13991	1.04663	0.137413	13.1291	5		0.974362	0.877301	b2267
	b3774	ilvC	ketol-acid reductoisomerase, NAD(P)-binding	0.685964	0.572779	0.721225	0.615285	0.901236	0.699298	0.126987	18.1592	5			0.643758	0.493227	0.779881	0.809091	0.681489	0.144718	21.2355	4		0.974534	0.852773	b3774
	b0952	ymbA	conserved protein	1.76831		0.916915	1.47365	0.82851	1.24685	0.4499	36.083	4			1.20336	1.26074	1.18174		1.21528	0.040827	3.35947	3		0.974681	0.897664	b0952
	b1436	yncJ	predicted protein	1.14861	5.5366		1.70069	1.08669	1.312	0.338038	25.7651	4		0.943416	1.08354	1.93614		1.15322	1.27908	0.446643	34.9192	4		0.974907	0.385278	b1436
	b1059	solA	N-methyltryptophan oxidase, FAD-binding	1.67865	0.920638	1.65209	9.68607	0.994681	1.31151	0.409856	31.2506	5		1.62638	1.56121	1.26935	1.30607	0.633562	1.27931	0.39298	30.718	5		0.975448	0.36884	b1059
	b1019	ycdB	conserved protein	0.979482	4.98764	0.74139	1.39471	0.983948	1.02488	0.271341	26.4753	5		1.11576	0.821254	1.05281	1.01115	0.998106	0.999817	0.109849	10.9869	5		0.975542	0.364682	b1019
	b2146	yeiT	predicted oxidoreductase	1.90706	0.415068	1.40559	1.205	0.859322	1.15841	0.562529	48.5605	5		0.904573	1.49848	1.33059	1.18733	0.731272	1.13045	0.31189	27.59	5		0.975864	0.925611	b2146
	b0730	mngR	DNA-binding transcriptional dual regulator, fatty-acyl-binding	0.353182	0.561746	0.52969	0.415804	0.777497	0.527584	0.163202	30.9338	5		0.508383	0.434734	0.467415		0.649066	0.514899	0.094383	18.3304	4		0.975957	0.888371	b0730
	b0214	rnhA	ribonuclease HI, degrades RNA of DNA-RNA hybrids	0.630508	0.506709	0.901547	0.341565	0.547475	0.585561	0.205591	35.11	5		0.543776	0.559468	0.549826	0.647596	0.557048	0.571543	0.0429607	7.51662	5		0.976061	0.888033	b0214
	b1753	ynjA	conserved protein		1.27201		1.21158	1.04256	1.17538	0.118932	10.1185	3			1.1613	1.22276	1.06564		1.1499	0.079179	6.88573	3		0.978318	0.774954	b1753
	b2876	yqeC	conserved protein	1.24797		0.660016	1.55943	0.973284	1.11018	0.383929	34.5827	4		1.16037	1.40964	1.06696	1.00606	0.78999	1.0866	0.226189	20.8161	5		0.978767	0.918039	b2876
	b1844	exoX	DNA exonuclease X	0.828781	0.844142	0.795661	0.904419	1.0628	0.887161	0.105806	11.9263	5		0.736099	0.784176	0.926038	0.699567	1.20176	0.869527	0.204661	23.537	5		0.980124	0.869741	b1844
	b0389	yaiA	predicted protein	2.18318	0.718786	1.44155	1.14015	0.840217	1.26478	0.584938	46.2482	5		0.968888	1.57117	1.55984	1.14889	0.950888	1.23994	0.307149	24.7714	5		0.980359	0.935708	b0389
	b3468	yhhN	conserved inner membrane protein	0.763633	0.37008	0.709451	0.56608	0.930995	0.668048	0.211645	31.6811	5		0.729932	0.558202	0.816942	0.692668	0.479914	0.655532	0.135353	20.6479	5		0.981264	0.914512	b3468
	b2055	wcaE	predicted glycosyl transferase	1.43823	6.67127	1.27228	1.11335	0.99141	1.20382	0.194023	16.1174	5		0.651439	1.49847	1.35378	0.986902	1.4173	1.18158	0.355169	30.0589	5		0.981526	0.368589	b2055
	b0999	cbpM	modulator of CbpA co-chaperone	1.85983	0.559082	1.68935	1.54879	0.80367	1.29214	0.574868	44.4894	5		0.939474	1.70971	1.39958	1.1873	1.10603	1.26842	0.297111	23.4237	5		0.98164	0.937332	b0999
	b2201	ccmA	heme exporter subunit	0.891815		0.315489	0.168647	0.827946	0.550974	0.362635	65.8171	4		0.656812	0.517946	0.525673	0.401221	0.60389	0.541108	0.0970464	17.9348	5		0.982094	0.960802	b2201
	b0232	yafN	predicted antitoxin of the YafO-YafN toxin-antitoxin system		1.08214	1.17645		0.980244	1.07961	0.0981265	9.08906	3		0.615632	1.1449	1.30125	0.962327	1.27818	1.06046	0.28285	26.6724	5		0.982259	0.895158	b0232
	b0706	ybfD	conserved protein	1.25687		1.34525	1.18081	1.19493	1.24447	0.0748724	6.01642	4		0.866259	1.33493	1.33397	1.23293	1.34397	1.22241	0.204229	16.707	5		0.982278	0.83162	b0706
	b0442	ybaV	conserved protein	0.958523		0.797121	1.06706	1.14439	0.991772	0.150504	15.1752	4		1.06516	1.15866	0.944241	0.866693	0.836477	0.974245	0.135758	13.9347	5		0.982327	0.861929	b0442
	b0686	ybfF	conserved protein	3.99416	1.38817	0.632884	0.918536	0.884601	0.956047	0.314998	32.948	5		1.03491	0.917954	0.955468	0.806658	0.982101	0.939417	0.0855617	9.10796	5		0.982606	0.371209	b0686
	b2718	hycH	protein required for maturation of hydrogenase 3	0.535134	3.56329	0.422089	1.71956	0.772026	0.862202	0.589876	68.4151	5		0.849996	0.803096	1.11615	0.773302	0.695535	0.847615	0.160271	18.9085	5		0.983082	0.399496	b2718
	b1260	trpA	tryptophan synthase, alpha subunit	1.15838	0.874049	0.738574	2.05278	0.757606	1.11628	0.549723	49.2461	5		1.42932		0.85905	1.07971	1.02361	1.09792	0.239956	21.8555	4		0.983555	0.948788	b1260
	b0837	yliI	predicted dehydrogenase	1.61243	0.469284	1.22488	0.942103	0.731257	0.99599	0.442378	44.4158	5		0.838171	0.923548	1.33839	1.01349	0.785648	0.97985	0.218311	22.28	5		0.983795	0.94412	b0837
	b1869	yecN	predicted inner membrane protein	0.281856	1.07371	0.788684	0.455419	0.677637	0.655462	0.305275	46.5741	5		0.662726	0.558289	0.568828	0.5339	0.903024	0.645353	0.152114	23.5706	5		0.984578	0.949362	b1869
	b0546	ybcM	DLP12 prophage; predicted DNA-binding transcriptional regulator	1.29325	0.641594	1.07998	0.497077	1.04925	0.91223	0.33079	36.2616	5		0.871292	0.756508	0.714843	0.979518	1.16939	0.89831	0.183423	20.4187	5		0.98474	0.936984	b0546
	b2764	cysJ	sulfite reductase, alpha subunit, flavoprotein	1.04471	0.676291	1.03334	1.23524	1.04723	1.00736	0.203222	20.1737	5		0.931404	1.14892	1.14724		0.740409	0.991993	0.196378	19.7963	4		0.984744	0.911932	b2764
	b1144	ymfJ	e14 prophage; predicted protein		6.25764	1.11451	0.68179	1.34504	1.04711	0.336722	32.1571	4		0.753764	1.05395	1.28685			1.03152	0.267248	25.9082	3		0.985107	0.389423	b1144
	b0734	cydB	cytochrome d terminal oxidase, subunit II	1.67377	0.890844	1.98798	1.93097	1.01958	1.50063	0.513791	34.2384	5		0.856236	2.10839	1.44509	1.5147		1.4811	0.51198	34.5674	4		0.986989	0.956422	b0734
	b1348	lar	Rac prophage; restriction alleviation protein		1.89435		1.07991	0.76613	1.2468	0.582333	46.7063	3		0.706873	1.34254	1.67166	1.09427	1.33759	1.23059	0.357555	29.0557	5		0.986997	0.968062	b1348
	b3874	yihN	predicted transporter	1.43334	0.92603	1.28912		1.40047	1.26224	0.232481	18.4181	4			11.8538	0.87105	1.22961	1.63781	1.24615	0.383647	30.7865	4		0.987257	0.394381	b3874
	b1496	yddA	fused predicted multidrug transporter subunits of ABC superfamily: membrane component/ATP-binding component		1.54904	0.563907		0.756557	0.956501	0.522116	54.586	3		0.647133	1.30166	0.88542			0.944737	0.331271	35.0648	3		0.987702	0.975562	b1496
	b1798	leuE	neutral amino-acid efflux system		2.51207	1.3055	0.630053	1.96129	1.60223	0.814432	50.8313	4		1.42641	1.50856	1.70437		1.6927	1.58301	0.13763	8.69417	4		0.988006	0.965665	b1798
	b1790	yeaM	predicted DNA-binding transcriptional regulator	0.791231			0.509849	0.918023	0.739701	0.208909	28.2423	3			0.977159	0.563223	0.65286		0.731081	0.217772	29.7877	3		0.988347	0.962917	b1790
	b0290	yagW	predicted receptor	1.39213	0.930297	1.16715	1.13964	0.910825	1.10801	0.197285	17.8054	5		1.19284	1.31709	0.933038	1.16595	0.866786	1.09514	0.188578	17.2195	5		0.988388	0.918649	b0290
	b0265	insA	KpLE2 phage-like element; IS1 repressor protein InsA	0.660339	0.502174	0.62594	0.932345	0.888388	0.721837	0.18254	25.2882	5		0.763466	0.721492	0.576311	0.984031	0.523353	0.71373	0.180779	25.3287	5		0.988769	0.94548	b0265
	b0980	appA	phosphoanhydride phosphorylase	1.46458	0.876176	0.620959	1.44622	1.08848	1.09928	0.364861	33.1908	5		0.967497		1.31332	1.02626	1.04074	1.08696	0.154197	14.1861	4		0.988786	0.947911	b0980
	b4297	yjhG	KpLE2 phage-like element; predicted dehydratase	2.00174	1.23146	1.20446	1.89757	1.18231	1.50351	0.409304	27.2233	5		0.954492	2.22017	1.47201	1.14474	1.6441	1.4871	0.490702	32.9972	5		0.98909	0.955678	b4297
	b3993	thiE	thiamin phosphate synthase (thiamin phosphate pyrophosphorylase)	0.634518		0.479862	0.695595	0.935326	0.686325	0.189208	27.5682	4		0.56527	0.485627	0.454651	1.31156	0.578696	0.679161	0.35737	52.6193	5		0.989561	0.970428	b3993
	b0165			2.93517		0.821492	1.13953	1.33796	1.09966	0.260534	23.6922	4		1.08532	0.89388	1.17203	1.01623	1.27377	1.08825	0.145269	13.349	5		0.98962	0.393125	b0165
	b4049	dusA	tRNA-dihydrouridine synthase A	0.861333	0.723172	0.677919	0.768758	0.804434	0.767123	0.070992	9.25432	5		0.85245	0.79927	0.633929	0.832013	0.679323	0.759397	0.0970514	12.7801	5		0.989928	0.889628	b4049
	b1564	relB	Qin prophage; bifunctional antitoxin of the RelE-RelB toxin-antitoxin system/ transcriptional repressor	4.43963	1.21576	2.09672	1.5565	1.07959	1.48715	0.453189	30.4738	5		6.97437	1.41123	1.44785	1.32203	1.70763	1.47218	0.165621	11.25	5		0.989939	0.708038	b1564
	b2008	yeeA	conserved inner membrane protein	0.805833		0.64545		1.22297	0.891417	0.298119	33.4433	3		0.76784	0.90965	0.836544	0.896411	1.00197	0.882483	0.0872666	9.88877	5		0.989977	0.963838	b2008
	b1997	insC	KpLE2 phage-like element; IS2 insertion element repressor InsA	1.46715			1.38307	1.03278	1.29433	0.23038	17.7992	3		1.60447	1.46272	1.54224	0.908644	0.889774	1.28157	0.352706	27.5214	5		0.99014	0.952748	b1997
	b1229	tpr	predicted protamine-like protein	1.09853	2.03955	1.09854	1.069	0.758821	1.21289	0.483841	39.8917	5		1.19217	1.24013	1.23893	1.13291		1.20104	0.0506092	4.2138	4		0.990228	0.959154	b1229
	b1745	astB	succinylarginine dihydrolase	0.727111	0.827503	0.601927	1.03128	1.18338	0.87424	0.233566	26.7165	5		0.883192	0.802957	0.865645	0.913072		0.866216	0.0464962	5.36774	4		0.990822	0.943524	b1745
	b3753	rbsR	DNA-binding transcriptional repressor of ribose metabolism	0.319643	0.969279	0.857023	1.04299	0.909177	0.819623	0.287962	35.1335	5			0.835024	0.825363	0.859983	0.728196	0.812141	0.0578332	7.12107	4		0.990872	0.957281	b3753
	b0582	insL	IS186/IS421 transposase	0.565711		0.890022	1.0761	0.725595	0.814358	0.219043	26.8977	4		0.889378	0.612786	0.717789	1.08272	0.732155	0.806965	0.183088	22.6885	5		0.990922	0.958668	b0582
	b3522	yhjD	conserved inner membrane protein	0.533292		0.426091	0.459621	0.798263	0.554317	0.168682	30.4307	4		0.614851		0.365321	0.658453	0.559603	0.549557	0.129313	23.5304	4		0.991414	0.965827	b3522
	b2560	yfhB	conserved protein	0.618422	0.849769	0.402001	0.42404	0.805153	0.619877	0.207968	33.5498	5			0.530668	0.574651	0.680776	0.673481	0.614894	0.0741314	12.056	4		0.991962	0.962163	b2560
	b2207	napD	assembly protein for periplasmic nitrate reductase	1.57588	1.26519	1.08578	0.390701	1.03106	1.06972	0.435095	40.6736	5		1.11388	0.822513		1.18877	1.11942	1.06115	0.162697	15.3322	4		0.991983	0.969049	b2207
	b0319	yahE	predicted protein	1.84039	0.614824	0.804713	1.94906	1.15454	1.27271	0.601148	47.2338	5		1.26902	1.76103	1.59129	0.726599	0.966134	1.26282	0.427697	33.8685	5		0.992228	0.976894	b0319
	b0736	ybgC	predicted acyl-CoA thioesterase	1.33442	1.4206	1.7527	2.34849	1.09857	1.59095	0.484072	30.4265	5		1.97945	1.44862	1.74117		1.14641	1.57891	0.360918	22.8586	4		0.99243	0.967112	b0736
	b4264	idnR	DNA-binding transcriptional repressor, 5-gluconate-binding	0.630726		1.62258	1.63547	1.04121	1.2325	0.487602	39.5621	4		1.14661	1.20212	1.32108			1.22327	0.0891378	7.28685	3		0.992513	0.972611	b4264
	b2657			7.2021	0.818802	1.25756	1.4168	0.920408	1.10339	0.280753	25.4445	5		0.906662	0.986818	1.19688	1.07998	1.30533	1.09513	0.1597	14.5827	5		0.992515	0.373076	b2657
	b0900	ycaN	predicted DNA-binding transcriptional regulator	1.23815	1.00626	1.54437	1.51107	0.939407	1.24785	0.278749	22.3383	5		1.06215	1.33617	1.31534	1.13358	1.34862	1.23917	0.131979	10.6506	5		0.993049	0.951998	b0900
	b3474	yhhT	predicted inner membrane protein	0.360089		0.469392	0.529011	0.780337	0.534707	0.178068	33.3019	4		0.522778	0.461966	0.568015	0.562594	0.539767	0.531024	0.0426571	8.03299	5		0.993112	0.970074	b3474
	b0960	yccS	predicted inner membrane protein	1.65092	1.16883	1.54948	1.62627	0.979051	1.39491	0.302908	21.7153	5			1.54841	1.38562		1.22379	1.38594	0.16231	11.7112	3		0.99357	0.958345	b0960
	b3666	uhpT	hexose phosphate transporter	0.485192	0.538626	0.644109		1.18851	0.71411	0.323087	45.2433	4		0.979602	0.799288	0.343012	0.717808		0.709927	0.267954	37.7439	4		0.994142	0.984766	b3666
	b3061	ttdA	L-tartrate dehydratase, alpha subunit	1.3853	0.68003	2.06849	1.21618	1.02098	1.2742	0.515694	40.4721	5		0.984554	1.00532	1.58684	1.18718	1.57104	1.26699	0.295534	23.3257	5		0.994343	0.979195	b3061
	b0039	caiA	crotonobetaine reductase subunit II, FAD-binding	0.783299	0.432946	0.999584	0.866102	0.909366	0.798259	0.218607	27.3855	5		0.68957	0.771853	1.00305	0.807656	0.697633	0.793952	0.127054	16.0028	5		0.994604	0.970772	b0039
	b1698	ydiR	predicted electron transfer flavoprotein, FAD-binding	1.25829	1.07152	0.411598	0.93456	0.628784	0.860951	0.340389	39.5364	5		1.18439	0.991677	0.529871	0.792393	0.784868	0.856639	0.24582	28.6958	5		0.994992	0.982296	b1698
	b4044	dinF	DNA-damage-inducible SOS response protein	0.374285			0.393433	0.912847	0.560188	0.305561	54.5462	3		0.670993	0.668993	0.352299	0.607442	0.487539	0.557453	0.136755	24.5321	5		0.995118	0.989405	b4044
	b0210	yafE	predicted S-adenosyl-L-methionine-dependent methyltransferase	0.706037	0.747884	0.610246	0.431643	0.792509	0.657664	0.143175	21.7703	5				0.64381	0.541114	0.7785	0.654475	0.119052	18.1904	3		0.995151	0.974213	b0210
	b0661	miaB	isopentenyl-adenosine A37 tRNA methylthiolase		1.34184	1.44766		1.03774	1.27574	0.212803	16.6807	3		1.05629	1.13463	1.29536	1.48891	1.37329	1.2697	0.175519	13.8237	5		0.995258	0.969068	b0661
	b3477	nikB	nickel transporter subunit	0.699396	0.601342	0.607307	0.696951	0.873913	0.695782	0.110104	15.8245	5		0.847709		0.516437	0.66072	0.745418	0.692571	0.140117	20.2314	4		0.995385	0.971377	b3477
	b2247	yfaW	predicted enolase	1.18506	0.506722	0.662498	1.81597	0.562309	0.946511	0.555551	58.6946	5		0.896476	1.20118	0.817253		0.854143	0.942262	0.175619	18.638	4		0.995511	0.987765	b2247
	b3485	yhhJ	predicted transporter subunit: membrane component of ABC superfamily	1.11006	0.532692	0.42757	1.51504	1.12293	0.941658	0.453191	48.1269	5		1.04891	1.00736	1.01018	0.837259	0.783769	0.937497	0.118594	12.65	5		0.995581	0.984995	b3485
	b0657	lnt	apolipoprotein N-acyltransferase	1.4658	1.02543	1.6318	1.7575	0.895034	1.35511	0.377851	27.8833	5			1.49821	1.31837	1.23236		1.34965	0.135656	10.0512	3		0.995964	0.977629	b0657
	b0676	nagC	DNA-binding transcriptional dual regulator, repressor of N-acetylglucosamine	1.21961	0.66371	0.799188	1.17538	1.07827	0.98723	0.243779	24.6932	5		0.939272	0.913206	1.14507	0.96341	0.95634	0.98346	0.0923894	9.39432	5		0.99618	0.97542	b0676
	b0064	araC	DNA-binding transcriptional dual regulator	1.12811	0.789143	0.737904		0.679702	0.833714	0.201291	24.1438	4		0.884882	0.866628		0.740795		0.830768	0.078452	9.44331	3		0.996467	0.979959	b0064
	b1350	recE	Rac prophage; exonuclease VIII, 5' -> 3' specific dsDNA exonuclease	1.69754	1.04464	1.11088	10.9801	1.07106	1.23103	0.312196	25.3606	5			1.75747	0.823502	1.10153		1.2275	0.47956	39.0679	3		0.997136	0.37622	b1350
	b0790	ybhP	predicted DNase			1.27855	4.26747	1.16865	1.2236	0.0777048	6.35051	3		1.43745	1.01462		1.43133	0.99899	1.2206	0.246962	20.2329	4		0.997548	0.421934	b0790
	b3155	yhbQ	predicted endonuclease	1.50068	0.871492	0.989005	1.22471	0.833949	1.08397	0.278447	25.6877	5				1.38775	0.930553	0.928019	1.08211	0.264697	24.4613	3		0.998283	0.99287	b3155
	b2761	ygcB	conserved protein, member of DEAD box family	1.74508		1.63121		1.01727	1.46452	0.391494	26.7319	3		1.55213	1.16426	1.78008	1.02353	1.79202	1.4624	0.353241	24.1549	5		0.998557	0.994256	b2761
	b0948	rlmL	predicted methyltransferase	1.40822	1.53684	1.14337	2.0782	1.21568	1.47646	0.370591	25.0999	5			1.47501	1.40334	1.44947	1.57295	1.4752	0.0716024	4.85376	4		0.999142	0.994366	b0948
	b0361	insD	KpLE2 phage-like element; IS2 insertion element transposase InsAB'			0.368897	1.86175	0.856269	1.02897	0.761262	73.9828	3			1.08692	0.898665	1.12892	0.998274	1.02819	0.102088	9.92892	4		0.999244	0.998753	b0361
	b1833	yebS	conserved inner membrane protein	0.768756	0.797966	0.6391	0.881101	0.693137	0.756012	0.0937969	12.4068	5		0.589226	1.41301	0.48065	0.678338	0.61636	0.755516	0.37444	49.5608	5		0.999344	0.997832	b1833
	b1250	kch	voltage-gated potassium channel	0.503514	0.666188	0.891796	0.590657	0.966344	0.7237	0.197878	27.3425	5		0.597486	0.713492	0.686124		0.896677	0.723445	0.125654	17.3689	4		0.999647	0.998192	b1250
	b2830	nudH	nucleotide hydrolase	2.21395	0.606437	1.44529	0.460394	0.653062	1.07583	0.743244	69.0858	5		0.771909	1.03876	1.30533	0.930628	1.33303	1.07593	0.241684	22.4628	5		1.0001	0.999775	b2830
	b1435	ydcP	predicted peptidase	0.667817		1.12094	1.01314	0.973105	0.943751	0.194262	20.584	4		0.856428	0.870509	0.820724	0.778726	1.39649	0.944576	0.255112	27.0081	5		1.00087	0.995765	b1435
	b1533	eamA	cysteine and O-acetyl-L-serine efflux system	0.99246		0.467296	0.535592	0.813104	0.702113	0.244601	34.8378	4		0.948703	0.531053	0.629967			0.703241	0.218254	31.0355	3		1.00161	0.995138	b1533
	b3590	selB	selenocysteinyl-tRNA-specific translation factor	0.558695	1.03012	0.52859	0.498808	0.847663	0.692776	0.234708	33.8793	5		0.754577	0.50094	0.513136	0.915807	0.785446	0.693981	0.181118	26.0984	5		1.00174	0.992982	b3590
	b0877	ybjX	conserved protein	0.90474	1.15528	1.24193	1.0683	1.07428	1.08891	0.124878	11.4682	5		0.78198	1.52485	0.952031	1.10726	1.08991	1.09121	0.275363	25.2348	5		1.00211	0.987026	b0877
	b4276			0.355517			0.258366	0.797276	0.470386	0.287232	61.063	3			0.421834	0.346048		0.646643	0.471509	0.156333	33.1559	3		1.00239	0.99562	b4276
	b4350	hsdR	endonuclease R	1.03797	2.12995	0.902819	0.869446	0.885853	1.16521	0.543432	46.6382	5		1.17126	1.26654	0.964242		1.27421	1.16906	0.144354	12.3478	4		1.00331	0.988491	b4350
	b1322	ycjF	conserved inner membrane protein	1.34907	44.3667	0.580341	0.385314	1.01072	0.831361	0.432881	52.069	5		1.36189	0.791939	0.6805	0.639247	0.697456	0.834206	0.300238	35.9908	5		1.00342	0.374147	b1322
	b2118	yehI	conserved protein	1.43519	0.626172	1.44784	1.6805	1.05073	1.24808	0.414614	33.22	5		1.21151	1.58697	1.52796	0.999013	0.936374	1.25237	0.297331	23.7415	5		1.00343	0.985536	b2118
	b1921	fliZ	predicted regulator of FliA activity	1.02678	17.695	0.998922	0.998065	1.17761	1.05034	0.0858883	8.17716	5		1.4563	0.691557	1.04541	0.733267	1.34537	1.05438	0.346787	32.8901	5		1.00384	0.374682	b1921
	b1078	flgG	flagellar component of cell-distal portion of basal-body rod	1.15982	1.22131	1.98075	1.67413	0.836937	1.37459	0.45162	32.8549	5		1.21385	1.32474	1.51051	1.47299		1.38052	0.137036	9.92641	4		1.00431	0.978915	b1078
	b3683			0.62475	0.415704	0.824017	1.00406	0.839935	0.741692	0.226499	30.5382	5		1.04257	0.725302	0.562758	1.00448	0.390053	0.745032	0.280832	37.6939	5		1.0045	0.984014	b3683
	b3861	yihF	conserved protein	1.48549	1.20279	1.05017		1.05643	1.19872	0.203772	16.9992	4		1.35581	1.33722	1.19513	0.856472	1.27805	1.20454	0.204408	16.9699	5		1.00486	0.967347	b3861
	b0808	ybiO	predicted mechanosensitive channel	0.307185	0.680071	0.933929	0.368991	1.05984	0.670003	0.333157	49.7247	5		0.294602	0.62745	0.689339	1.10574	0.649257	0.673279	0.288686	42.8776	5		1.00489	0.987158	b0808
	b0510				0.925641	1.58847		0.931732	1.14861	0.380938	33.165	3			1.80465	0.783378	1.02909	1.0025	1.1549	0.446934	38.6988	4		1.00548	0.984798	b0510
	b1888	cheA	fused chemotactic sensory histidine kinase in two-component regulatory system with CheB and CheY: sensory histidine kinase/signal sensing protein		1.56266	1.52142	1.87461	0.83908	1.44944	0.436392	30.1075	4			1.46135	0.90601	2.00761		1.45832	0.550807	37.7699	3		1.00613	0.9828	b1888
	b2533	suhB	inositol monophosphatase	1.7992	0.921605	1.11571	3.26045	1.04374	1.62814	0.974294	59.8409	5		1.40165	1.18154	1.01556	2.95619		1.63874	0.892427	54.4582	4		1.00651	0.986933	b2533
	b3146	yraL	predicted methyltransferase	0.587364	0.641603	0.527469	0.372928	0.590602	0.543993	0.103823	19.0854	5		0.572278	0.462198	0.482019	0.519318	0.701916	0.547546	0.0959385	17.5215	5		1.00653	0.956574	b3146
	b4011	yjaA	conserved protein		1.2499	1.20488	1.73428	0.935409	1.28112	0.332495	25.9535	4			1.42219	1.44056	1.00781		1.29019	0.244716	18.9675	3		1.00708	0.968451	b4011
	b0318	yahD	predicted transcriptional regulator with ankyrin domain	2.11245	1.14945	1.35988	1.67426	0.924414	1.44409	0.464663	32.1768	5		1.06965	1.92545	1.28665	1.76875	1.22596	1.45529	0.370491	25.4582	5		1.00775	0.967474	b0318
	b4180	rlmB	23S rRNA (Gm2251)-methyltransferase	0.467355	0.955298	0.54793	0.398523	0.756672	0.625156	0.228319	36.5219	5		0.93537	0.532254	0.57086	0.54365	0.569885	0.630404	0.171298	27.1728	5		1.0084	0.968289	b4180
	b2774	ygcW	predicted deoxygluconate dehydrogenase	1.00152		0.86628	0.522179	1.53557	0.981389	0.420971	42.8955	4			0.83697	0.950175	0.90542	1.2686	0.990292	0.191291	19.3166	4		1.00907	0.97105	b2774
	b4390	nadR	bifunctional DNA-binding transcriptional repressor/ NMN adenylyltransferase	1.47133	0.677735	1.5772	1.29291	0.891067	1.18205	0.384421	32.5216	5		0.812172	1.15327	1.41836	1.03669	1.54424	1.19295	0.29377	24.6256	5		1.00922	0.961145	b4390
	b3411	yhgA	predicted transposase	0.403787	1.23498	0.542358	0.608851	1.31227	0.820449	0.421141	51.3306	5		1.35863	0.581585	0.558382	0.76474	0.877868	0.82824	0.324602	39.1918	5		1.0095	0.974715	b3411
	b2769	ygcQ	predicted flavoprotein		0.596295	0.625115	1.30714	0.749445	0.819498	0.331816	40.4901	4			0.728702	1.05427	0.643701	0.882496	0.827293	0.180733	21.8463	4		1.00951	0.968807	b2769
	b2792	yqcC	conserved protein	0.917314	0.743871	0.672589	1.63454	0.946515	0.982966	0.381998	38.8618	5		1.27374	0.759454	0.966996		0.969142	0.992334	0.211821	21.3458	4		1.00953	0.964245	b2792
	b1682	sufC	component of SufBCD complex, ATP-binding component of ABC superfamily	1.53541		0.698632	1.92983	1.12558	1.32236	0.529835	40.0673	4		0.73176	1.22056		1.232	2.15766	1.33549	0.595642	44.6008	4		1.00993	0.974802	b1682
	b0794	ybhF	fused predicted transporter subunits of ABC superfamily: ATP-binding components	1.38152	0.53808	1.23979	1.28303	0.953128	1.07911	0.341847	31.6786	5		0.892419			1.15685	1.22154	1.09027	0.174369	15.9932	3		1.01034	0.953375	b0794
	b0273	argF	CP4-6 prophage; ornithine carbamoyltransferase 2, chain F	1.43847	0.894133	1.50849		0.858907	1.175	0.346139	29.4586	4		1.17361	1.31728	1.30033	0.961566	1.18466	1.18749	0.142144	11.9702	5		1.01063	0.949411	b0273
	b3547	yhjX	predicted transporter	0.621916	0.637433	0.771642	0.545857	0.696927	0.654755	0.0846736	12.9321	5		0.583628	0.582005	0.633047	0.684237	0.82669	0.661921	0.101238	15.2946	5		1.01094	0.90645	b3547
	b0642	leuS	leucyl-tRNA synthetase	1.12538	1.27628		0.836169	0.982174	1.055	0.188951	17.9101	4		0.598305	0.973105	1.58559	1.03153	1.14482	1.06667	0.355226	33.3023	5		1.01106	0.951615	b0642
	b2437	eutR	predicted DNA-binding transcriptional regulator	0.414375	0.909648		0.784819	1.80744	0.702947	0.257587	36.6439	4		1.04999	0.579589	0.500034	0.713536		0.710786	0.242689	34.1437	4		1.01115	0.448402	b2437
	b0041	fixA	predicted electron transfer flavoprotein subunit, ETFP adenine nucleotide-binding domain	1.75659	0.893531	0.918751	2.16499	0.710844	1.28894	0.635165	49.278	5		1.21215	1.63281	1.25494	1.40403	1.01599	1.30398	0.230172	17.6515	5		1.01167	0.96221	b0041
	b3462	ftsX	predicted transporter subunit: membrane component of ABC superfamily	1.52859		0.301435	1.18835	0.951375	0.992438	0.518013	52.196	4			1.12945	0.953302	0.887902	1.04589	1.00413	0.105736	10.5301	4		1.01179	0.967287	b3462
	b2199	ccmC	heme exporter subunit	0.76241	0.483582	0.616733	0.967413	1.05531	0.777089	0.237541	30.5681	5		0.801374	1.2178	0.607421	0.769829	0.535198	0.786325	0.265397	33.7516	5		1.01189	0.955201	b2199
	b2090				1.78563		3.48299	0.780245	1.28294	0.710912	55.4129	3		1.5264	1.15556	0.744719	1.63583	1.42979	1.29846	0.357097	27.5016	5		1.0121	0.460234	b2090
	b3945	gldA	glycerol dehydrogenase, NAD	0.449665	0.527111	0.391491	0.694159	0.851457	0.582777	0.188416	32.3308	5		0.851986	0.590555	0.399589	0.733134	0.374208	0.589894	0.207332	35.1473	5		1.01221	0.956101	b3945
	b3944	yijF	conserved protein		1.64863	1.48233		0.679624	1.2702	0.518165	40.7941	3		1.04782	0.8737		1.39523	1.82614	1.28572	0.420478	32.7036	4		1.01223	0.968242	b3944
	b1399	paaX	DNA-binding transcriptional repressor of phenylacetic acid degradation, aryl-CoA responsive	3.75706		1.3436		0.969219	1.15641	0.264725	22.892	3		1.1159	1.1966		1.20043		1.17098	0.0477373	4.0767	3		1.0126	0.432157	b1399
	b0731	mngA	fused 2-O-a-mannosyl-D-glycerate specific PTS enzymes: IIA component/IIB component/IIC component	0.903003	0.562981	0.657755	1.11643	0.969528	0.84194	0.227539	27.0256	5		0.996908	0.971406	0.589561			0.852625	0.228176	26.7616	3		1.01269	0.951679	b0731
	b1029	ycdU	predicted inner membrane protein			1.38192	1.38074	0.988202	1.25029	0.226971	18.1536	3		1.2204	1.17081		0.995929	1.68031	1.26686	0.291965	23.0463	4		1.01326	0.93597	b1029
	b3826	yigL	predicted hydrolase	1.10459	0.790218	0.661834		1.01856	0.8938	0.203744	22.7953	4		0.870055	1.2293	0.792056	0.851828	0.786115	0.905872	0.184464	20.3632	5		1.01351	0.929523	b3826
	b2159	nfo	endonuclease IV with intrinsic 3'-5' exonuclease activity	1.83231	0.989437	0.601739	1.04926	1.35335	1.16522	0.458872	39.3808	5		1.5916	1.01007	0.849428	1.24934	1.20789	1.18167	0.279796	23.6781	5		1.01412	0.947464	b2159
	b0625			1.79248	1.30419	1.45598	1.78772	1.13231	1.49453	0.293109	19.6121	5		1.78132	1.76055		1.00577		1.51588	0.441891	29.1508	3		1.01428	0.945237	b0625
	b3937	yiiX	predicted peptidoglycan peptidase	0.561997	0.366643	1.0747	0.33112	0.55133	0.577157	0.297192	51.4924	5		0.658628	0.560978	0.569372	0.536019	0.603344	0.585668	0.0473704	8.08826	5		1.01475	0.952472	b3937
	b2046	wzxC	colanic acid exporter	1.34558	0.886026	0.646671	1.90408	1.00818	1.15811	0.487262	42.074	5		1.04272	1.69009	1.36711	1.00976	0.766585	1.17525	0.358409	30.4963	5		1.01481	0.951147	b2046
	b0307	ykgF	predicted amino acid dehydrogenase with NAD(P)-binding domain and ferridoxin-like domain	1.4212	0.848008	0.857628	0.841004	1.14363	1.02229	0.257004	25.1399	5		1.11376	1.08703	0.912485			1.03776	0.10931	10.5333	3		1.01513	0.910132	b0307
	b3295	rpoA	RNA polymerase, alpha subunit	1.40492	2.11275	1.20781	1.25089	0.893435	1.37396	0.452887	32.9621	5		6.87208	1.18449	1.1453	1.48204	1.77337	1.3963	0.292916	20.978	5		1.01626	0.371324	b3295
	b3100	yqjK	conserved protein	0.678308			0.364949	0.877317	0.640192	0.258302	40.3477	3		0.562345	0.692507	0.735815	0.614087	0.650217	0.650994	0.0673412	10.3444	5		1.01687	0.949417	b3100
	b0110	ampD	N-acetyl-anhydromuranmyl-L-alanine amidase	0.748299		0.745379	0.640755	0.839265	0.743425	0.0811461	10.9152	4		0.844329	0.691252		0.743729	0.744739	0.756012	0.0639576	8.45986	4		1.01693	0.816041	b0110
	b4395	ytjC	phosphoglyceromutase 2, co-factor independent	0.73502		0.573072	1.19047	0.986385	0.871238	0.272415	31.2675	4		1.25111	0.711846			0.695901	0.886284	0.316045	35.6596	3		1.01727	0.950472	b4395
	b2111	yehD	predicted fimbrial-like adhesin protein			1.90958	2.20654	1.0812	1.73244	0.583209	33.6641	3		2.49392	1.45389		1.34067		1.76282	0.63567	36.0598	3		1.01754	0.954298	b2111
	b4062	soxS	DNA-binding transcriptional dual regulator	2.0718	0.831436	1.27085	1.33522	0.958751	1.29361	0.483104	37.3454	5		1.07104	1.83426	1.72992	4.60861	0.63187	1.31677	0.568025	43.1378	5		1.0179	0.39354	b4062
	b3555	yiaG	predicted transcriptional regulator		2.45996		1.05486	1.50573	1.67352	0.717419	42.869	3		3.32692	0.73502	1.0485			1.70348	1.41465	83.0447	3		1.01791	0.975975	b3555
	b1558	cspF	Qin prophage; cold shock protein			1.22616	1.09227	1.08148	1.1333	0.0805951	7.11152	3		0.680551	1.39168	1.48455	1.05968		1.15411	0.364603	31.5916	4		1.01836	0.918162	b1558
	b1756	ynjD	predicted transporter subunit: ATP-binding component of ABC superfamily	0.624897	1.09891	0.661242	1.23265	0.672502	0.858041	0.285421	33.2643	5		0.891451	0.858231	1.03221	0.799957	0.788488	0.874068	0.0979538	11.2067	5		1.01868	0.910149	b1756
	b4013	metA	homoserine O-transsuccinylase		0.584636	0.397758	1.67641	0.874307	0.6189	0.240115	38.7971	4		0.753292	0.687409	0.498064	0.575564	0.639616	0.630789	0.0986868	15.645	5		1.01921	0.438694	b4013
	b0354	yaiL	nucleoprotein/polynucleotide-associated enzyme		3.60335	0.632863	0.745743	0.630685	0.669764	0.0658091	9.82571	4		0.695223	0.73136	0.704516		0.599817	0.682729	0.057359	8.40143	4		1.01936	0.39877	b0354
	b2244	yfaD	conserved protein	1.23657		0.941466	0.596099	0.96527	0.934852	0.262526	28.082	4		0.750914	1.04863		0.927255	1.08537	0.953043	0.150742	15.8169	4		1.01946	0.909222	b2244
	b0164	yaeI	predicted phosphatase	0.644175		0.71768	0.620022	0.841725	0.705901	0.0996196	14.1124	4		0.554109	0.704911	0.570912	0.926999	0.84373	0.720132	0.164417	22.8316	5		1.02016	0.877448	b0164
	b0923	mukE	protein involved in chromosome partitioning	1.03483	1.64153		0.966726	1.13604	1.19478	0.305846	25.5986	4		1.06247	3.7142	1.42776	1.44229	0.943006	1.21888	0.254371	20.8692	5		1.02017	0.372576	b0923
	b1546	tfaQ	Qin prophage; predicted tail fibre assembly protein	3.81689	0.603161	1.98023	0.551194	0.669688	0.951067	0.687818	72.3207	5		0.961127	0.859387	0.773782	0.61663	1.64505	0.971195	0.397293	40.9076	5		1.02116	0.440935	b1546
	b3985	rplJ	50S ribosomal subunit protein L10	0.387613	0.912112	0.238715	0.391995	0.828889	0.551865	0.298798	54.1433	5		0.602985	0.498962	0.434134	0.688926	0.592986	0.563599	0.0988189	17.5336	5		1.02126	0.936879	b3985
	b3628	rfaB	UDP-D-galactose:(glucosyl)lipopolysaccharide-1,6-D-galactosyltransferase	1.49174		1.88014	0.693238	1.04164	1.27669	0.518351	40.6012	4		0.468885	1.04787	1.68141	1.14213	2.18106	1.30427	0.652091	49.9966	5		1.0216	0.945619	b3628
	b1749	xthA	exonuclease III	1.01858	0.832061	0.996841	0.871609	0.904562	0.924732	0.0803505	8.68906	5		0.98584	0.828505	0.993659	0.980875	0.935314	0.944839	0.0688974	7.29197	5		1.02174	0.682446	b1749
	b3465	rsmD	predicted methyltransferase	0.885562		0.910913		0.787754	0.86141	0.0650346	7.54979	3		1.03908	0.934433	0.665156	0.884138		0.880701	0.157525	17.8863	4		1.0224	0.835369	b3465
	b1853	yebK	predicted DNA-binding transcriptional regulator	0.809979	3.63219		0.792907	1.06405	0.888979	0.151856	17.0821	4			0.982795		0.834582	0.909946	0.909108	0.0741099	8.15194	3		1.02264	0.405301	b1853
	b3965	trmA	tRNA (uracil-5-)-methyltransferase	0.570556	0.840074	0.390749	0.794797	0.780915	0.675418	0.190082	28.1429	5		0.699947	0.694455	0.627391	0.842871	0.590503	0.691033	0.0965694	13.9746	5		1.02312	0.875346	b3965
	b0517	allD	ureidoglycolate dehydrogenase	2.05316	1.20116	0.926449		1.62637	1.45179	0.493599	33.9994	4		2.6423		0.805035		1.00952	1.48562	1.00692	67.7778	3		1.0233	0.960956	b0517
	b1805	fadD	acyl-CoA synthetase (long-chain-fatty-acid--CoA ligase)	0.839668	0.57913	0.646493	1.33858	0.918611	0.864497	0.298857	34.57	5		1.1226	0.731374	0.864154		0.821899	0.885006	0.167798	18.9601	4		1.02372	0.900559	b1805
	b1516	lsrB	AI2 transporter	1.52882	0.759507	0.549419	1.69852	1.07609	1.12247	0.489703	43.6272	5		0.989961	1.84992	0.879342	1.05028	0.976439	1.14919	0.396491	34.5018	5		1.0238	0.926892	b1516
	b1801	yeaV	predicted transporter	2.73459	0.515104	1.23787	1.28614	0.89658	0.983922	0.357418	36.3258	5		1.10583	1.04991	0.907973	1.06063	0.913174	1.0075	0.0909589	9.02814	5		1.02397	0.436111	b1801
	b0295	ykgL	predicted protein		6.08486	0.98663	1.18876	0.942552	1.03931	0.131287	12.6321	4		1.40424	0.98183	1.01326		0.862798	1.06553	0.23492	22.0472	4		1.02522	0.400731	b0295
	b0506	allR	DNA-binding transcriptional repressor	1.49485	0.903999	1.4664	0.81888	0.898253	1.11648	0.33427	29.9397	5			1.93823		0.964663	0.532701	1.1452	0.719947	62.8666	3		1.02573	0.952943	b0506
	b1413	hrpA	ATP-dependent helicase	1.11584	0.984126	1.15048	0.788977	0.825758	0.973035	0.163989	16.8533	5		1.04944	0.978059		0.983775	0.982015	0.998323	0.0341639	3.42213	4		1.02599	0.752319	b1413
	b2378	lpxP	palmitoleoyl-acyl carrier protein (ACP)-dependent acyltransferase	0.318661	1.03168	0.398906		0.654648	0.600973	0.320894	53.3957	4		0.843318	0.602331	0.485659		0.535242	0.616638	0.158503	25.7044	4		1.02607	0.934104	b2378
	b1859	znuB	zinc transporter subunit: membrane component of ABC superfamily		1.52428	1.09672	1.34329	0.974821	1.23478	0.246457	19.9597	4		2.05474	1.08098	0.873311	1.11573	1.21252	1.26746	0.457161	36.0691	5		1.02647	0.895364	b1859
	b3927	glpF	glycerol facilitator	4.90903	1.88646		1.49066	1.12855	1.50189	0.379078	25.24	4			1.47427	1.14752	2.00383		1.54187	0.43214	28.027	3		1.02662	0.425493	b3927
	b1550	gnsB	Qin prophage; predicted protein			1.50674	0.707459	1.08621	1.10014	0.39982	36.3428	3		1.02684	0.795868		1.22467	1.47166	1.12976	0.287506	25.4485	4		1.02693	0.919209	b1550
	b0807	ybiN	predicted SAM-dependent methyltransferase	1.23503	0.833673	0.741323	1.49225	0.957186	1.05189	0.308421	29.3206	5		0.977941	1.41235		0.851567		1.08062	0.294153	27.2208	3		1.02731	0.901171	b0807
	b0135	yadC	predicted fimbrial-like adhesin protein	0.715477	1.1599		1.47882	1.13516	1.12234	0.31315	27.9016	4		0.764028	1.22974	1.10638		1.51214	1.15307	0.310023	26.8867	4		1.02738	0.893633	b0135
	b4475	rtcA	RNA 3'-terminal phosphate cyclase			0.597636	0.512009	0.861127	0.656924	0.181954	27.6979	3		0.641066	0.554129	0.830198		0.678351	0.675936	0.115261	17.0521	4		1.02894	0.883441	b4475
	b0674	asnB	asparagine synthetase B	0.909591	0.80023	0.470951	0.895166	0.866711	0.78853	0.182437	23.1363	5			0.772681	0.690554	0.932108	0.851925	0.811817	0.103786	12.7845	4		1.02953	0.817127	b0674
	b1473	yddG	predicted methyl viologen efflux pump	0.671016		0.650702	0.604622	0.753405	0.669936	0.0621932	9.28345	4		1.98485	0.890317	0.677272	0.502208		0.689932	0.194364	28.1714	4		1.02985	0.378905	b1473
	b0004	thrC	threonine synthase	1.08761	0.719308	0.613876	0.79868	0.998023	0.8435	0.195977	23.2338	5		0.733325	0.843226	0.960715	0.955941	0.851015	0.868844	0.0940289	10.8223	5		1.03005	0.803393	b0004
	b0620	dpiA	DNA-binding response regulator in two-component regulatory system with citA	1.3729	0.725995	1.63606	0.785626	1.12364	1.12884	0.386311	34.2218	5		1.04374	1.19188		1.09944	1.31599	1.16276	0.11903	10.2368	4		1.03005	0.860157	b0620
	b2708	gutQ	predicted phosphosugar-binding protein		2.30079	1.19776		1.37844	1.62566	0.591616	36.3923	3			2.24968	1.83188		0.94214	1.67457	0.667816	39.8799	3		1.03009	0.928984	b2708
	b2543	yphA	predicted inner membrane protein	0.903182	0.505123	0.492389	1.05439	0.82707	0.756431	0.249087	32.9293	5		1.15424	0.742644	0.698979	0.592468	0.708176	0.779301	0.216991	27.8443	5		1.03024	0.880877	b2543
	b4023	pagB	conserved protein	0.745972	0.547059	1.16946	0.453021	0.614821	0.706066	0.280163	39.6795	5		7.87674	0.823913	0.597442	0.730385	0.757967	0.727427	0.0951265	13.0771	5		1.03025	0.368514	b4023
	b1998				1.13584	1.08063	2.10412	1.01769	1.33457	0.515297	38.6115	4		0.942471	1.13242		1.05907	2.36771	1.37542	0.666138	48.4317	4		1.03061	0.926074	b1998
	b0473	htpG	molecular chaperone HSP90 family	0.667921	1.95248	0.694284	0.710588	1.03399	1.01185	0.546617	54.0215	5		1.09565	0.92942	0.843158	1.11886	1.22736	1.04289	0.154396	14.8046	5		1.03068	0.907868	b0473
	b0530	sfmA	predicted fimbrial-like adhesin protein	1.74902	0.828562	1.46734	0.733424	1.05579	1.16683	0.431232	36.9577	5		1.18184	1.12236	1.35673	1.10982	1.24384	1.20292	0.101162	8.40974	5		1.03093	0.863451	b0530
	b1735	chbR	DNA-binding transcriptional dual regulator	1.26714		1.28953	1.21487	0.815455	1.14675	0.223065	19.452	4			1.30868	0.900325	0.873557	1.64782	1.1826	0.368562	31.1655	4		1.03126	0.874422	b1735
	b1055	yceA	conserved protein	1.70957	1.03805	1.18835	1.43256	0.674817	1.20867	0.392285	32.4559	5		1.17244	1.16811	1.43716	1.29078	1.1649	1.24668	0.118955	9.54172	5		1.03145	0.84438	b1055
	b2453	eutG	predicted alcohol dehydrogenase in ethanolamine utilization	0.428138	0.388004	0.576668		1.04707	0.60997	0.302487	49.5906	4		0.28451	1.22928	0.51864	0.622959	0.49209	0.629495	0.35706	56.7216	5		1.03201	0.931764	b2453
	b2031			1.49937	0.97757	1.07051	2.13042	1.2763	1.39084	0.459697	33.0519	5		0.771075	2.10496	1.47376		1.39507	1.43622	0.545505	37.9821	4		1.03263	0.898687	b2031
	b0515	ylbA	conserved protein			0.456876	1.2397	0.768545	0.821707	0.39411	47.9623	3			0.85503	0.626712	1.0082	0.904378	0.84858	0.161099	18.9845	4		1.0327	0.91965	b0515
	b2829	ptsP	fused PTS enzyme: PEP-protein phosphotransferase (enzyme I)/GAF domain containing protein			0.600777	1.59275	0.966796	1.05344	0.50163	47.6183	3		1.01187	1.0305	0.883202	1.42639		1.08799	0.234911	21.5913	4		1.0328	0.919768	b2829
	b1627	rsxA	predicted inner membrane subunit	1.15682		1.20958	1.45663	1.11399	1.23425	0.153318	12.4219	4		0.958757	1.57143	1.39693		1.17204	1.27479	0.266676	20.9192	4		1.03284	0.803092	b1627
	b2698	recX	regulatory protein for RecA	0.860083	0.625331	1.92234	1.72839	0.961749	1.21958	0.570439	46.7735	5		0.612389	1.07825	1.46953	1.35191	1.78651	1.25972	0.442152	35.0993	5		1.03291	0.904283	b2698
	b0759	galE	UDP-galactose-4-epimerase	0.794038	1.31373	0.992392	0.968138	1.74874	1.16341	0.377167	32.4192	5		1.33435		0.985207	1.08412	1.40542	1.20227	0.199825	16.6206	4		1.03341	0.849118	b0759
	b3438	gntR	DNA-binding transcriptional repressor	0.610667	0.514756	0.480622	0.816875	0.854499	0.655484	0.171787	26.2077	5		0.829541	0.595632	0.687284	0.755447	0.519497	0.67748	0.123445	18.2212	5		1.03356	0.82256	b3438
	b0129	yadI	predicted PTS Enzyme IIA	1.61652	0.558408	0.698247	1.79709	1.07025	1.1481	0.546986	47.6426	5		0.973029	1.80315	1.27433	0.928795	0.958495	1.18756	0.371462	31.2794	5		1.03437	0.897578	b0129
	b3459	yhhK	conserved protein	0.923104	0.594928		0.580219	0.684371	0.695655	0.158463	22.779	4		0.827663	0.642643	0.715699	0.796403	0.616235	0.719729	0.092464	12.8471	5		1.0346	0.799314	b3459
	b4035	malK	fused maltose transport subunit, ATP-binding component of ABC superfamily/regulatory protein	1.66497	0.887731	1.40164	3.88365	0.892362	1.21168	0.386636	31.9092	5			2.06582		1.27909	0.41597	1.25363	0.82522	65.8266	3		1.03462	0.526751	b4035
	b1168	ycgG	conserved inner membrane protein	1.44042	1.34889	0.849629	1.65141	1.11174	1.28042	0.309011	24.1336	5		0.866336	2.16811	1.43665	1.02146	1.13468	1.32545	0.515275	38.8756	5		1.03517	0.871968	b1168
	b2236	yfaE	predicted 2Fe-2S cluster-containing protein	0.569418		0.954274	1.01984	0.935943	0.869869	0.203513	23.3958	4		0.992058	0.870128	0.990807	0.660538	0.988839	0.900474	0.143915	15.9821	5		1.03518	0.809009	b2236
	b2998	yghW	predicted protein		1.14208	0.899527	7.49263	0.899211	0.980272	0.140128	14.2948	4			1.21529	1.19249	0.705059	0.946222	1.01476	0.23973	23.6242	4		1.03519	0.400528	b2998
	b3090	ygjV	conserved inner membrane protein	0.669185			1.01662	0.926599	0.870801	0.180313	20.7065	3		1.09801	1.1801	0.603309	1.01054	0.615758	0.901544	0.273263	30.3106	5		1.0353	0.85466	b3090
	b2460	eutQ	conserved protein	1.12768		0.495266		0.834211	0.819053	0.316479	38.6397	3		1.30701	0.870618	0.652387	0.833871	0.577369	0.848251	0.284124	33.4953	5		1.03565	0.902045	b2460
	b4167	yjeF	predicted carbohydrate kinase	0.672145	0.478922	0.494075	1.02966	0.868158	0.708592	0.239082	33.7404	5		0.865612	0.722859	0.626415		0.721255	0.734035	0.0986286	13.4365	4		1.03591	0.836644	b4167
	b3368	cysG	fused siroheme synthase 1,3-dimethyluroporphyriongen III dehydrogenase and siroheme ferrochelatase/uroporphyrinogen methyltransferase	0.483433	0.525727	0.673415	0.354036	0.500969	0.507516	0.114054	22.473	5		0.333087	0.673765	0.306605	0.660508	0.656212	0.526035	0.188568	35.847	5		1.03649	0.85661	b3368
	b3081	fadH	2,4-dienoyl-CoA reductase, NADH and FMN-linked	0.411376	1.00687	0.384597		0.794432	0.649319	0.303092	46.6785	4		0.976473	0.718785	0.376843	0.7628	0.530193	0.673019	0.229324	34.074	5		1.0365	0.901544	b3081
	b3439	yhhW	predicted protein	0.631068	0.600815	0.515112	1.41405	1.11801	0.855811	0.391148	45.7049	5		0.788705	1.32497	0.868242		0.567779	0.887425	0.318192	35.8556	4		1.03694	0.897412	b3439
	b0276	yagJ	CP4-6 prophage; predicted protein	9.59718	0.990811	1.28797	1.53778	0.990616	1.20179	0.264209	21.9846	5			1.04948		0.862992	1.82678	1.24642	0.511184	41.0123	3		1.03713	0.389868	b0276
	b0821	ybiU	predicted protein			0.824986	1.01708	1.28315	1.04174	0.230073	22.0855	3		0.856944	0.897886	1.07229	1.61032	0.972857	1.08206	0.306464	28.3223	5		1.03871	0.840366	b0821
	b1797	yeaR	conserved protein	1.35453	0.680753	0.89241	1.55991	1.04578	1.10668	0.352805	31.8796	5		0.851092	1.70067	1.32896	0.718106		1.14971	0.451347	39.2575	4		1.03888	0.881265	b1797
	b3433	asd	aspartate-semialdehyde dehydrogenase, NAD(P)-binding	1.87388	0.938211	0.654962	0.663488	0.967762	1.01966	0.499721	49.0085	5		0.916759	1.08886	1.1392	1.20231	0.950254	1.05948	0.12239	11.552	5		1.03905	0.870161	b3433
	b0651	rihA	ribonucleoside hydrolase 1	1.38351	0.779121	1.08949	1.13903	1.09373	1.09698	0.215039	19.6028	5		1.10382	1.47133		1.21617	0.768902	1.14006	0.291323	25.5534	4		1.03927	0.814142	b0651
	b3119	tdcR	DNA-binding transcriptional activator			1.70994	2.01726	1.06678	1.598	0.485028	30.3523	3		0.85744	1.65708	2.65956	1.46986		1.66098	0.748193	45.0451	4		1.03942	0.89807	b3119
	b2042	galF	predicted subunit with GalU	1.95586		1.16542		1.04226	1.38784	0.495754	35.7211	3		1.38445	1.22416	1.74056		1.42332	1.44312	0.216215	14.9824	4		1.03983	0.869884	b2042
	b1301	puuB	gamma-Glu-putrescine oxidase, FAD/NAD(P)-binding	0.708574		0.934009		1.14707	0.929884	0.219276	23.581	3		1.04828	0.940243	0.999034	0.923883	0.923276	0.966943	0.0550444	5.69262	5		1.03985	0.799169	b1301
	b3352	yheS	fused predicted transporter subunits of ABC superfamily: ATP-binding components	1.40758		1.28093	1.12406	1.0248	1.20934	0.169068	13.9802	4		0.825114	1.75816	1.61022	1.1045	0.994905	1.25858	0.404472	32.1372	5		1.04071	0.814039	b3352
	b2791	truC	tRNA pseudouridine synthase	0.74531	0.655143	1.06742	0.555825	1.04787	0.814313	0.232122	28.5053	5		0.321077	0.728971	1.21818	0.932622	1.03702	0.847573	0.343415	40.5174	5		1.04084	0.862673	b2791
	b1460	ydcC	conserved protein	1.17638	0.713655	0.274114	1.33987	0.812804	0.863365	0.4175	48.3573	5		0.957664	1.06164		0.90395	0.672455	0.898927	0.16456	18.3063	4		1.04119	0.86795	b1460
	b1164	ycgZ	predicted protein	1.7593	1.43203		1.8745	1.09551	1.54033	0.350811	22.775	4		1.05181	2.8113	1.35681		1.19772	1.60441	0.814179	50.7463	4		1.0416	0.891929	b1164
	b2161	nupX	predicted nucleoside transporter		1.34079	1.791		0.991144	1.37431	0.40098	29.1768	3		2.72382		0.296099	1.27495		1.43162	1.22142	85.3171	3		1.0417	0.944362	b2161
	b0826	moeB	molybdopterin synthase sulfurylase	0.68015	1.55848	0.598755	0.565969	1.0953	0.89973	0.424968	47.2329	5			0.867946	0.943661	0.87803	1.05942	0.937265	0.088085	9.39809	4		1.04172	0.855944	b0826
	b1875	yecM	predicted metal-binding enzyme	1.06864	1.18958	0.724203	0.717769	1.18905	0.977848	0.239612	24.5041	5		1.02814	0.804012	1.06127	1.07932	1.12066	1.01868	0.124562	12.2278	5		1.04176	0.746786	b1875
	b3063	ttdT	predicted tartrate:succinate antiporter	0.534344	0.519232	0.357922	0.291701	0.842354	0.509111	0.213258	41.8883	5		0.695617	0.476675	0.397792	0.563741	0.518822	0.530529	0.110695	20.865	5		1.04207	0.848579	b3063
	b2321	flk	predicted flagella assembly protein	0.441111	0.986519	0.71558	0.717824	0.809831	0.734173	0.197421	26.8903	5		0.863024	0.676049	0.758829	0.765565		0.765867	0.0764993	9.9886	4		1.04317	0.754278	b2321
	b1011	rutB	predicted enzyme	0.977207	0.885543	0.966774	1.07179	1.04892	0.990047	0.0737824	7.45241	5		0.9727	1.75853	0.755355	0.907737	0.770502	1.03296	0.415846	40.2575	5		1.04335	0.830758	b1011
	b3841			0.492995		0.583052	0.681752	0.701977	0.614944	0.0964829	15.6897	4		0.581513	0.52893		0.930657	0.526002	0.641775	0.194269	30.2706	4		1.04363	0.815734	b3841
	b4380	yjjI	conserved protein	1.2316	0.817704	0.469132	0.577293	0.887164	0.796579	0.297156	37.304	5		1.32481	0.611394	0.9956	0.711473	0.513545	0.831365	0.329482	39.6315	5		1.04367	0.865238	b4380
	b0419	yajO	2-carboxybenzaldehyde reductase, function unknown	0.996637	0.508733	0.621526	1.08516	1.0575	0.853911	0.268535	31.4477	5			1.25936	0.618338	0.796205		0.8913	0.33092	37.1279	3		1.04379	0.877264	b0419
	b2980	glcC	DNA-binding transcriptional dual regulator, glycolate-binding	2.07963	0.760202	1.05186	1.56656	1.05438	1.30253	0.522525	40.1163	5			1.68656	1.06453		1.32998	1.36036	0.312125	22.9443	3		1.0444	0.851148	b2980
	b0283	yagQ	conserved protein	1.45019	1.78118	0.676331	1.47612	1.00399	1.27756	0.435655	34.1005	5		1.07686	1.58315		1.34318		1.33439	0.253261	18.9795	3		1.04448	0.823309	b0283
	b0125	hpt	hypoxanthine phosphoribosyltransferase		2.62179		0.92213	1.03884	0.980485	0.0825267	8.41692	3				1.24785	1.20645	0.619209	1.0245	0.351604	34.3195	3		1.04489	0.462993	b0125
	b2164	yeiM	predicted nucleoside transporter	1.35066	1.01318	1.33975	1.40135	1.21167	1.26332	0.156331	12.3746	5		0.882371	1.47658	1.3965		1.52655	1.3205	0.296957	22.4882	4		1.04526	0.743862	b2164
	b0068	tbpA	thiamin transporter subunit	0.518772	0.676048	0.296024	0.647488	0.552772	0.538221	0.150154	27.8982	5				0.432495	0.509039	0.747104	0.562879	0.164069	29.1482	3		1.04582	0.84218	b0068
	b1633	nth	DNA glycosylase and apyrimidinic (AP) lyase (endonuclease III)	1.74902	0.333331	1.42945	0.891509	0.892506	1.05916	0.546746	51.6206	5		1.00948	1.27097	1.08559	1.23815	0.937528	1.10834	0.143846	12.9785	5		1.04643	0.854147	b1633
	b0230			0.876367	0.422469	0.554348	0.613106	0.668607	0.626979	0.166748	26.5954	5		0.818774	0.670826	0.638518	0.567491	0.585797	0.656281	0.099728	15.1959	5		1.04674	0.746514	b0230
	b2725	hycA	regulator of the transcriptional regulator FhlA	0.774004	1.49115	0.580008	0.984919	0.67056	0.900128	0.363173	40.3468	5		1.21881	0.85719	1.0284	0.884122	0.724425	0.942589	0.188394	19.9868	5		1.04717	0.824186	b2725
	b4076	nrfG	heme lyase (NrfEFG) for insertion of heme into c552, subunit NrfG	0.693781	0.507148	0.563915	0.568686	0.664535	0.599613	0.0772382	12.8813	5		0.750802	0.625356	0.59477	0.589807	0.579334	0.628014	0.0707439	11.2647	5		1.04737	0.56123	b4076
	b1972	yedZ	conserved inner membrane protein	1.03038	0.580501		0.328249	0.811731	0.687716	0.301945	43.9054	4		0.890123	0.757778	0.766288	0.463622	0.726303	0.720823	0.156746	21.7455	5		1.04814	0.851433	b1972
	b1366			1.35258	1.32134		2.17327	1.30077	1.53699	0.424723	27.6334	4		1.40104	1.9697		1.62413	1.44974	1.61115	0.257505	15.9827	4		1.04825	0.777361	b1366
	b3669	uhpA	DNA-binding response regulator in two-component regulatory system wtih UhpB	0.642832	0.895151	0.484702	1.2785	0.741952	0.808628	0.302129	37.3632	5			0.9629	0.690307	0.890311		0.847839	0.141172	16.6509	3		1.04849	0.812199	b3669
	b3101	yqjF	predicted quinol oxidase subunit	0.49687	1.00571	0.552913	1.08547	0.880617	0.804317	0.266063	33.0794	5		0.984647	0.601798	0.867127	0.857611	0.908425	0.843922	0.144321	17.1012	5		1.04924	0.779441	b3101
	b2732	ygbA	predicted protein	1.04703	0.804656	1.29563	0.902729	0.918474	0.993705	0.189526	19.0727	5		0.776386	1.65667	1.1993	0.84352	0.739118	1.043	0.388664	37.2641	5		1.04961	0.807594	b2732
	b1677	lpp	murein lipoprotein		1.11433		1.63897	0.975885	1.24306	0.349783	28.1389	3		0.982119	1.87682	1.26816		1.09185	1.30474	0.399176	30.5943	4		1.04962	0.837005	b1677
	b0647	ybeT	conserved outer membrane protein	1.34233		0.870816	0.599082	1.1173	0.982382	0.319964	32.5702	4		1.05773	0.854053	0.959571	1.11484	1.17148	1.03153	0.12638	12.2517	5		1.05003	0.787349	b0647
	b4065	yjcE	predicted cation/proton antiporter	0.491888	1.11689	0.551316	0.359153	0.742502	0.652351	0.294045	45.0746	5		0.876019	0.645765	0.634041	0.664548	0.604957	0.685066	0.108914	15.8984	5		1.05015	0.824647	b4065
	b2325	yfcL	predicted protein	0.796603		0.697507	1.08009	0.945186	0.879846	0.167872	19.0797	4		1.3169	1.07068	0.854342	0.757329	0.620689	0.923989	0.274098	29.6646	5		1.05017	0.775397	b2325
	b4225	chpB	toxin of the ChpB-ChpS toxin-antitoxin system		17.4586	1.33734		1.11991	1.22862	0.153744	12.5135	3		1.36799	1.20644	1.28154	0.958762	1.6433	1.29161	0.248828	19.265	5		1.05126	0.427189	b4225
	b4301	sgcE	KpLE2 phage-like element; predicted epimerase		1.66087	0.434548	0.401571	0.969943	0.602021	0.319057	52.9976	4		0.947312	0.602756	0.441446	0.570421	0.602984	0.632984	0.187894	29.6839	5		1.05143	0.494285	b4301
	b3497	yhiQ	predicted SAM-dependent methyltransferase	0.484088	0.553548	0.616917	0.565154	0.783246	0.60059	0.112551	18.7401	5			0.688048	0.444073	0.83865	0.555427	0.63155	0.170318	26.9683	4		1.05155	0.766929	b3497
	b3154	yhbP	conserved protein	1.09704		1.10241	0.979178	1.09204	1.06767	0.0591451	5.53966	4		1.25121	0.939524	1.15784	1.14301		1.12289	0.131294	11.6925	4		1.05173	0.484204	b3154
	b0357	frmR	regulator protein that represses frmRAB operon	0.325921	0.364183	2.01003	0.213729	1.19009	0.820791	0.77016	93.8314	5			1.08845	0.897954	0.603399		0.863266	0.244377	28.3084	3		1.05175	0.913448	b0357
	b1234	rssA	conserved protein	1.05456	0.784756	1.413	1.33854	1.10747	1.13967	0.249251	21.8705	5		1.08498	1.85297	1.22359	0.914566	0.918362	1.19889	0.387601	32.3299	5		1.05197	0.78234	b1234
	b3192	yrbC	predicted ABC-type organic solvent transporter	0.745198			1.0025	0.894641	0.880778	0.129208	14.6697	3		1.55236	0.724807		0.661246	0.767826	0.92656	0.419492	45.2741	4		1.05198	0.847825	b3192
	b0422	xseB	exonuclease VII small subunit	0.323267	1.26509	0.386676	0.374744	0.566287	0.412743	0.105996	25.6808	5		0.402178	0.395666	0.349609	0.515452	0.508764	0.434334	0.0738706	17.0078	5		1.05231	0.448071	b0422
	b2370	evgS	hybrid sensory histidine kinase in two-component regulatory system with EvgA	0.61282	1.11069	0.88394		0.801138	0.852148	0.206347	24.2149	4		0.696257	1.21899	0.602296	1.19148	0.774952	0.896794	0.288286	32.1463	5		1.05239	0.794714	b2370
	b0228	yafM	conserved protein	0.403915	1.15202	0.899197	0.664941	0.736333	0.771281	0.277854	36.025	5		0.932897		0.868386	0.676042	0.769456	0.811695	0.112679	13.882	4		1.0524	0.777924	b0228
	b0024	yaaY	predicted protein	0.693168	1.5684	0.995645	1.05669	0.866532	1.03609	0.328542	31.7099	5		1.04963	0.913403	0.967368		1.43246	1.09072	0.234612	21.5099	4		1.05273	0.779857	b0024
	b0783	moaC	molybdopterin biosynthesis, protein C	0.941973		0.793957		0.986388	0.907439	0.100756	11.1033	3		0.839072	0.826954	0.85399	1.10335	1.15595	0.955864	0.160019	16.7408	5		1.05336	0.618698	b0783
	b2706	gutM	DNA-binding transcriptional activator of glucitol operon	0.573825	1.33376	1.70304	1.49135	1.02464	1.22532	0.440301	35.9335	5		1.09864	1.63717	1.34063	1.05547	1.32487	1.29135	0.232334	17.9915	5		1.05389	0.776672	b2706
	b1573				3.35021		1.08449	1.16129	1.12289	0.0543009	4.83581	3		0.997781	1.03522	1.47677	0.784127	1.62446	1.18367	0.35229	29.7625	5		1.05413	0.457187	b1573
	b4028	yjbG	conserved protein	0.646886	0.690682	0.60294	0.793538	0.935151	0.733839	0.132899	18.1101	5		0.527964	0.861755		0.907194	0.798377	0.773823	0.169872	21.9523	4		1.05449	0.713841	b4028
	b1784	yeaH	conserved protein	3.37785		0.570781	1.11052	1.04783	0.90971	0.29519	32.4488	4		0.684365	1.53963	0.818657	1.06856	0.68719	0.959681	0.359907	37.5028	5		1.05493	0.439655	b1784
	b3097	yqjC	conserved protein	1.41395	1.96573	0.974142	0.835375	1.35919	1.30968	0.441951	33.745	5		1.3428	1.38389	1.17898	1.61397	1.38908	1.38175	0.155418	11.2479	5		1.05503	0.744922	b3097
	b3364	tsgA	predicted transporter	1.02301	0.90089	0.775913		0.800688	0.875125	0.112424	12.8466	4		1.00764	1.14511	0.684981		0.856794	0.923632	0.197933	21.4298	4		1.05543	0.688577	b3364
	b0294	matA	predicted regulator		1.35982	2.18584	1.40932	1.22863	1.5459	0.433382	28.0343	4		2.70615		1.47075	1.20093	1.15386	1.63292	0.728981	44.6427	4		1.05629	0.845674	b0294
	b3887	dtd	D-tyr-tRNA(Tyr) deacylase	0.963373	0.656818	1.00618	1.21351	1.27084	1.02214	0.242715	23.7457	5		0.981197	1.29105	0.752237	1.51714	0.861134	1.08055	0.316516	29.292	5		1.05714	0.75229	b3887
	b3412	bioH	carboxylesterase of pimeloyl-CoA synthesis	0.505361	0.631781	0.607652	0.452197	0.987669	0.636932	0.209367	32.8712	5		0.688497	0.486999	0.55303	0.768219	0.87023	0.673395	0.155881	23.1485	5		1.05725	0.763392	b3412
	b0730	mngR	DNA-binding transcriptional dual regulator, fatty-acyl-binding	1.76484	0.49935	1.44736	0.683481	1.03605	1.08622	0.524425	48.28	5		0.833145	1.17354	1.39497	1.24244	1.10012	1.14884	0.207356	18.0491	5		1.05765	0.81336	b0730
	b1769	ydjE	predicted transporter	1.27412	0.772		1.38065	1.06191	1.12217	0.268423	23.92	4		0.993821	1.17947	1.04436	1.30643	1.41337	1.18749	0.175518	14.7806	5		1.05821	0.691943	b1769
	b3111			0.676824		0.690101	0.949536	0.877191	0.798413	0.136088	17.0448	4		0.964965	0.669886	0.941379	0.975594	0.674716	0.845308	0.158427	18.7419	5		1.05874	0.647785	b3111
	b3516	gadX	DNA-binding transcriptional dual regulator	1.45784	1.13725	1.51112	0.883457	1.25776	1.24949	0.25422	20.3459	5			1.39878	1.46086	1.10992		1.32318	0.187283	14.1539	3		1.05898	0.656592	b3516
	b2927	epd	D-erythrose 4-phosphate dehydrogenase	0.223874	0.395718	0.63558	0.167109	0.614338	0.407324	0.215898	53.004	5		0.267303	0.326992	0.50721		0.625054	0.43164	0.164396	38.0864	4		1.0597	0.853374	b2927
	b3071	yqjI	predicted transcriptional regulator	2.9157			1.55467	1.14874	1.87303	0.925503	49.412	3		2.49409	1.94877	2.07786	2.2311	1.17472	1.98531	0.496544	25.0109	5		1.05994	0.859769	b3071
	b2730	hypE	carbamoyl phosphate phosphatase, hydrogenase 3 maturation protein	2.31197	0.97433	0.99016	1.18968	1.06258	1.30574	0.568886	43.568	5		1.20167		1.42684	1.15379	1.75583	1.38453	0.274673	19.8387	4		1.06034	0.794375	b2730
	b1531	marA	DNA-binding transcriptional dual activator of multiple antibiotic resistance		1.15593	1.26803	0.857328	0.881083	1.04059	0.203354	19.5422	4		0.981635	0.840649	1.11212	1.05834	1.52483	1.10352	0.256699	23.2619	5		1.06047	0.693847	b1531
	b3487	yhiI	predicted HlyD family secretion protein	0.658775	0.994668	0.869613	0.789983	0.747807	0.812169	0.12725	15.6679	5			0.780556	0.821814		0.982321	0.861564	0.106594	12.3722	3		1.06082	0.581092	b3487
	b1015	putP	proline:sodium symporter	0.791419		1.21195	1.02962	0.840921	0.968477	0.19204	19.8291	4		1.01889	0.948943	0.939526	1.21845	1.01179	1.02752	0.112577	10.9561	5		1.06097	0.611296	b1015
	b0494	tesA	multifunctional acyl-CoA thioesterase I and protease I and lysophospholipase L1	0.61286	2.0821	0.923206	0.637686	0.900106	1.03119	0.604794	58.65	5			0.785928	1.1008	1.28589	1.20414	1.09419	0.219019	20.0165	4		1.06109	0.837239	b0494
	b1829	htpX	predicted endopeptidase	0.757239	0.465931	0.794357	0.592943	0.862003	0.694495	0.16165	23.2759	5		0.580277	0.770152	0.835542	0.900887	0.599167	0.737205	0.142503	19.3301	5		1.0615	0.669554	b1829
	b0524	lpxH	UDP-2,3-diacylglucosamine pyrophosphatase	0.557672	1.22489	0.552712	0.286642	1.00758	0.725899	0.38065	52.4384	5		4.88354	0.763639	0.665551	0.810699	0.842814	0.770676	0.0772582	10.0247	5		1.06168	0.356136	b0524
	b3121	yhaC	predicted protein		0.624402	1.25675	1.12363	0.626453	0.90781	0.330566	36.4136	4		1.0539	0.994814	0.862865	0.797642	1.11177	0.964198	0.131122	13.599	5		1.06211	0.764892	b3121
	b3098	yqjD	conserved protein	0.797972	1.27789		0.813419	1.13108	1.00509	0.237999	23.6794	4		1.20214	0.973057	1.03977	1.08009	1.04386	1.06778	0.0844585	7.90971	5		1.06238	0.64465	b3098
	b3878	yihQ	alpha-glucosidase	0.890584	0.446022	0.501173	1.63507	1.01893	0.898355	0.479506	53.376	5		0.913358		0.988095	0.962391		0.954615	0.0379708	3.97761	3		1.06263	0.806734	b3878
	b0003	thrB	homoserine kinase	0.388821	0.683946	0.368765	0.301599	0.663579	0.481342	0.178746	37.1348	5		0.460325	0.422384	0.41476	0.740204	0.519977	0.51153	0.13444	26.2819	5		1.06272	0.771076	b0003
	b3600	mtlD	mannitol-1-phosphate dehydrogenase, NAD(P)-binding	0.38131	0.793395	1.06942	1.24048	1.01432	0.899786	0.330947	36.7806	5		0.94399	0.873348	0.746307	1.23319	0.987643	0.956895	0.179427	18.7509	5		1.06347	0.745705	b3600
	b3694			0.690417	0.431172	1.48958	0.901552	0.753452	0.853234	0.394293	46.2116	5		0.594443			1.02475	1.10343	0.907541	0.27399	30.1903	3		1.06365	0.826709	b3694
	b0055	djlA	DnaJ-like protein, membrane anchored	1.23428	0.360528	0.972038	0.828665	0.67732	0.814567	0.3264	40.0703	5		0.775424	1.00317	0.989662	0.847832	0.716635	0.866545	0.127427	14.7052	5		1.06381	0.75309	b0055
	b3311	rpsQ	30S ribosomal subunit protein S17	0.955569		1.58007	1.25141	2.17444	1.49037	0.522529	35.0603	4			1.98566	1.71107	1.06105		1.58593	0.474842	29.941	3		1.06411	0.811459	b3311
	b2186	yejK	nucleotide associated protein	0.706777	1.15115	0.930213		0.77145	0.889897	0.197855	22.2335	4		1.03309	0.923013	0.877839	0.885137	1.01651	0.947117	0.0731922	7.72789	5		1.0643	0.614686	b2186
	b3160	yhbW	predicted enzyme	1.08001	0.584245	1.02958	1.06618	1.05567	0.963136	0.21261	22.0748	5		1.01486	1.10203	1.03264	1.32193	0.657036	1.0257	0.239614	23.361	5		1.06496	0.67402	b3160
	b1814	sdaA	L-serine deaminase I	1.41876	0.558636	1.21943	0.62836	0.964013	0.957839	0.370417	38.6721	5		0.955634	1.09022	1.21192	1.1164	0.726739	1.02018	0.187884	18.4167	5		1.06509	0.748704	b1814
	b1720			1.63858	0.677955	0.805063	1.55911	1.17446	1.17103	0.431935	36.885	5		0.868844	1.19284	1.60511		1.32538	1.24805	0.30568	24.4926	4		1.06577	0.763721	b1720
	b0809	glnQ	glutamine transporter subunit	0.436547	0.582974	1.35068	0.310778	1.11702	0.759599	0.451144	59.3923	5			0.648924	0.847269	0.933219		0.809804	0.145803	18.0048	3		1.06609	0.827127	b0809
	b4171	miaA	delta(2)-isopentenylpyrophosphate tRNA-adenosine transferase	0.39644	0.503093	0.617288	0.444062	0.746126	0.541402	0.141092	26.0604	5		0.527725	0.616606	0.56954	0.691796	0.481821	0.577497	0.0810684	14.0379	5		1.06667	0.636507	b4171
	b2175	spr	predicted peptidase, outer membrane lipoprotein	0.299378		0.936958		0.343192	0.321285	0.0309813	9.64293	3			0.124366	0.28894	0.443959	0.513712	0.342744	0.173261	50.5511	4		1.06679	0.476224	b2175
	b2963	mltC	membrane-bound lytic murein transglycosylase C	1.02101	0.362374	0.389133	0.851949	0.762935	0.677481	0.290771	42.9195	5		0.817035	0.658135	0.622123	0.820056	0.697155	0.722901	0.0912607	12.6242	5		1.06704	0.753057	b2963
	b4121	yjdF	conserved inner membrane protein	0.395769	0.487635		0.453755	0.96762	0.576195	0.263693	45.7645	4		0.691512	0.566699	0.527072	0.80174	0.489741	0.615353	0.128918	20.9503	5		1.06796	0.798557	b4121
	b1216	chaA	calcium/sodium:proton antiporter	0.494868	0.895577		0.748723	0.862758	0.750482	0.181659	24.2057	4		0.535648	0.856014		0.760636	1.05393	0.801556	0.215281	26.8579	4		1.06806	0.729647	b1216
	b1927	amyA	cytoplasmic alpha-amylase	1.18794	2.21858	1.13257	1.18516	0.795955	1.30404	0.53655	41.1451	5		1.44984	1.33066	1.1032		1.68865	1.39309	0.243933	17.5102	4		1.06829	0.75237	b1927
	b2809	ygdI	predicted protein	0.319247	1.24672	0.790301		0.770934	0.7818	0.378723	48.4425	4		0.933288	0.916128	0.82791		0.664219	0.835386	0.123096	14.7353	4		1.06854	0.802439	b2809
	b3571	malS	alpha-amylase	0.808583	0.738504	1.00208	1.06392	1.15504	0.953625	0.174924	18.3431	5		0.88903	1.37968	0.860602	0.949011		1.01958	0.24288	23.8216	4		1.06916	0.666007	b3571
	b1483	ddpF	D-ala-D-ala transporter subunit	1.44593	0.476423	0.931082		0.780593	0.908507	0.405131	44.593	4		0.904925	0.964773	1.16297	1.28001	0.544702	0.971476	0.282167	29.0452	5		1.06931	0.802048	b1483
	b0346	mhpR	DNA-binding transcriptional activator, 3HPP-binding	1.50311	0.895203	1.2618	1.33479	1.13105	1.22519	0.228226	18.6278	5		0.80959	1.99601	1.23809	1.33919	1.16829	1.31023	0.432183	32.9852	5		1.06941	0.710501	b0346
	b1255	yciC	predicted inner membrane protein	46.0296		0.55651	1.55192	1.20704	1.10516	0.505468	45.7371	4		4.26891	1.25873		1.16096	1.12686	1.18218	0.0684489	5.79005	4		1.06969	0.423905	b1255
	b4073	nrfD	formate-dependent nitrite reductase, membrane subunit		0.681719	0.393371	0.338197	0.639143	0.513108	0.172478	33.6143	4		0.592947	0.70707	0.35635	0.642223	0.446095	0.548937	0.144319	26.2906	5		1.06983	0.750895	b4073
	b1939	fliG	flagellar motor switching and energizing component	8.57194	0.808255	1.89137	1.38356	0.905581	1.24719	0.497636	39.9005	5		0.998729		1.49655		1.50978	1.33502	0.29131	21.8207	3		1.07042	0.405612	b1939
	b3999	yjaG	conserved protein	1.66539	0.96501	1.38595	1.52037	1.13722	1.33479	0.283779	21.2602	5			2.05969	1.26323	1.03816	1.35474	1.42895	0.441032	30.864	4		1.07055	0.72672	b3999
	b3860	dsbA	periplasmic protein disulfide isomerase I	0.836206	3.64756	0.842029	0.710798	0.824674	0.803427	0.0621719	7.73834	5		0.896648	0.949163	0.998598	0.693046	0.763412	0.860173	0.128165	14.8999	5		1.07063	0.420479	b3860
	b2753	iap	aminopeptidase in alkaline phosphatase isozyme conversion	1.20289	0.655102	0.554145	0.62774	0.835252	0.775027	0.260558	33.6192	5		0.954293	0.610752	0.865709	0.892365		0.83078	0.151306	18.2125	4		1.07194	0.700993	b2753
	b2660	ygaF	predicted enzyme	0.544722		0.353408	0.296898	0.928928	0.530989	0.285703	53.8057	4		0.654743	0.547517	0.478394		0.597362	0.569504	0.0748915	13.1503	4		1.07253	0.809214	b2660
	b2650			2.98272			1.03711	1.12056	1.07884	0.0590091	5.46969	3			1.15057		0.860188	1.46237	1.15771	0.301155	26.013	3		1.07311	0.477372	b2650
	b1449	yncB	predicted oxidoreductase, Zn-dependent and NAD(P)-binding	1.53007	0.590355	1.1088	1.3784	1.24871	1.17127	0.360209	30.7538	5		1.09578	1.35824	1.05561	1.46078	1.31449	1.25698	0.174379	13.8729	5		1.07318	0.649581	b1449
	b2312	purF	amidophosphoribosyltransferase	0.878331	0.555778	0.643177	1.10741	0.979232	0.832786	0.230013	27.6197	5			0.721661	0.967019	0.862963	1.02384	0.893871	0.132734	14.8493	4		1.07335	0.634179	b2312
	b3324	gspC	general secretory pathway component, cryptic	0.624414	0.624972		0.794504	0.842192	0.721521	0.113489	15.7292	4		0.921848		0.592397		0.810521	0.774922	0.167586	21.6261	3		1.07401	0.663377	b3324
	b2957	ansB	periplasmic L-asparaginase II			1.16184	0.867713	1.07444	1.03466	0.151042	14.5982	3		1.54179	0.483588	1.1326	1.01378	1.38501	1.11135	0.407502	36.6671	5		1.07412	0.718539	b2957
	b3873	yihM	predicted sugar phosphate isomerase	0.919564	0.8615	1.4359	0.977452	1.30124	1.09913	0.253861	23.0965	5		0.178986	1.10648	1.65517	0.820138	2.1457	1.18129	0.75751	64.1254	5		1.07475	0.827435	b3873
	b1622	malY	bifunctional beta-cystathionase, PLP-dependent/ regulator of maltose regulon	1.12094	1.17107	0.747423	1.04369	1.34495	1.08562	0.219055	20.1779	5		1.27246	1.27603	0.87945	1.2046	1.20198	1.16691	0.16457	14.1031	5		1.07488	0.52712	b1622
	b2301	yfcF	predicted enzyme	0.832869	0.850472	0.539915	0.655283	0.805438	0.736795	0.134416	18.2433	5		1.07876	0.64441	0.599175	0.845533		0.79197	0.219136	27.6698	4		1.07488	0.678212	b2301
	b2513	yfgM	conserved protein	0.751662	1.22951		1.34601	1.02261	1.08745	0.260764	23.9794	4		1.12531	0.947288	1.06857	1.16456	1.54258	1.16966	0.224015	19.1522	5		1.0756	0.634846	b2513
	b1267	yciO	conserved protein	0.869663		0.768643	1.40152	1.14099	1.0452	0.284859	27.254	4			0.924778	1.38008	1.03109	1.16714	1.12577	0.196424	17.448	4		1.07708	0.659863	b1267
	b0608	ybdR	predicted oxidoreductase, Zn-dependent and NAD(P)-binding	0.770669	0.930313	0.628001	0.676708	0.797112	0.76056	0.117109	15.3977	5		0.783352	0.679242	0.818064	1.02793	0.788438	0.819406	0.127858	15.6037	5		1.07737	0.469834	b0608
	b4302	sgcA	KpLE2 phage-like element; predicted phosphotransferase enzyme IIA component	0.297832	0.441444	0.584039	1.74009	0.923501	0.561704	0.268009	47.7135	5		0.865888	0.533349	0.647083	0.52303	0.457605	0.605391	0.160788	26.5593	5		1.07778	0.507373	b4302
	b1288	fabI	enoyl-[acyl-carrier-protein] reductase, NADH-dependent	0.59323	0.922692	0.737487	0.450657	1.02436	0.745686	0.23417	31.4034	5		1.11057	0.534861	0.665161	0.645269	1.06273	0.803718	0.26355	32.7913	5		1.07782	0.722497	b1288
	b4081	mdtO	predicted multidrug efflux system component	0.568271	0.191593	0.342319	0.805805	1.20265	0.476997	0.268352	56.2587	5		0.53022	0.472678	0.425023	0.663762	0.47958	0.514253	0.0915156	17.7959	5		1.0781	0.584644	b4081
	b2020	hisD	bifunctional histidinal dehydrogenase/ histidinol dehydrogenase	1.21136	0.794834	0.954082	1.24192	0.927033	1.02584	0.19325	18.8381	5		1.02685	1.10384	1.24946	1.0991	1.05169	1.10619	0.0863797	7.80876	5		1.07832	0.431188	b2020
	b4371	rsmC	16S rRNA m2G1207 methylase	0.577146		0.610451	0.259954	0.835503	0.570763	0.236858	41.4985	4		0.414328		0.700736	0.732669		0.615911	0.175305	28.4627	3		1.0791	0.783621	b4371
	b2006				3.5147	1.13303	0.821298	1.15526	1.03653	0.186725	18.0145	4		1.11913	0.962114	1.16587	1.13217	1.21371	1.1186	0.094805	8.47535	5		1.07918	0.452946	b2006
	b1877	yecT	predicted protein		0.363576		1.01807	0.92726	0.769636	0.354578	46.0709	3		0.881621	0.725164	0.969692	0.518218	1.05829	0.830597	0.213595	25.7159	5		1.07921	0.805349	b1877
	b4051	qor	quinone oxidoreductase, NADPH-dependent	1.60635	1.09461	0.959072	0.696644	1.0857	1.08848	0.331104	30.4191	5		1.14036	1.19491	1.29207	1.03473	1.21292	1.175	0.0954167	8.12059	5		1.07949	0.600399	b4051
	b0886	cydC	fused cysteine transporter subunits of ABC superfamily: membrane component/ATP-binding component			0.743599	1.53586	0.604329	0.961262	0.502464	52.2713	3		5.41554	1.02624	0.669323	1.41751		1.03769	0.374223	36.0632	4		1.07951	0.37268	b0886
	b3386	rpe	D-ribulose-5-phosphate 3-epimerase	0.430726	1.04111		0.441873	1.00939	0.730774	0.340308	46.5681	4		0.158801	0.710258	0.800409	1.09361	1.18378	0.789371	0.403769	51.1507	5		1.08018	0.820106	b3386
	b0092	ddlB	D-alanine:D-alanine ligase	0.879811	1.20454	0.671585	0.461292	1.61796	0.967037	0.455736	47.127	5		0.674949		0.84986	1.12782	1.52616	1.0447	0.371212	35.5329	4		1.08031	0.786315	b0092
	b1638	pdxH	pyridoxine 5'-phosphate oxidase	0.707279	1.26818	0.315965			0.763808	0.478617	62.662	3		0.681633	0.815898	0.772292	0.790423	1.06794	0.825637	0.144592	17.5128	5		1.08095	0.845933	b1638
	b2200	ccmB	heme exporter subunit	0.57369		0.650817	0.173999	0.774215	0.54318	0.259608	47.794	4		0.476943		0.598906	0.715917	0.557081	0.587212	0.0996138	16.9639	4		1.08106	0.767834	b2200
	b1383	ydbL	conserved protein			1.08951	0.892662	0.798549	0.926905	0.14847	16.0179	3			0.788544	0.899788	1.07891	1.24304	1.00257	0.200023	19.951	4		1.08163	0.590593	b1383
	b1000	cbpA	curved DNA-binding protein, DnaJ homologue that functions as a co-chaperone of DnaK	1.17262		0.74081	1.33861	1.11635	1.0921	0.252484	23.1192	4		0.915766	1.36387			1.2672	1.18228	0.235814	19.9457	3		1.08258	0.649258	b1000
	b0038	caiB	crotonobetainyl CoA:carnitine CoA transferase			0.2976	1.38191	0.770528	0.81668	0.543627	66.5655	3		1.11393	1.08334		0.877265	0.462334	0.884219	0.300253	33.9568	4		1.0827	0.858804	b0038
	b1845	ptrB	protease II	1.14516	0.496731	0.867121	1.27243	0.971474	0.950583	0.297838	31.3321	5		0.984713	1.02147		0.973807	1.13761	1.0294	0.074964	7.28231	4		1.08291	0.595519	b1845
	b0394	mak	manno(fructo)kinase	1.14443	0.508828	0.622179	1.33284	1.02857	0.927369	0.350028	37.7442	5		0.915335	1.65578	0.696408	1.00579	0.749112	1.00448	0.384791	38.3073	5		1.08315	0.748866	b0394
	b1741	cho	endonuclease of nucleotide excision repair	0.863492	0.815543	0.822995	0.523111	1.0239	0.809808	0.181052	22.3574	5		0.814833	1.18662	0.696416	0.968717	0.719287	0.877174	0.203484	23.1976	5		1.08319	0.595541	b1741
	b1570	dicA	Qin prophage; predicted regulator for DicB	6.13711	1.21744	1.36924	1.62436	0.963292	1.29358	0.276905	21.4061	5			1.57605	1.49577	1.13319		1.40167	0.235949	16.8334	3		1.08356	0.429479	b1570
	b2549	yphG	conserved protein	0.606835	0.517682	0.502593	0.897502	0.861552	0.677233	0.189343	27.9583	5		0.734632	0.68871		0.793569	0.718987	0.733975	0.0440659	6.00374	4		1.08378	0.548066	b2549
	b2759	ygcK	predicted protein		1.79425	1.35734		1.00244	1.38468	0.396616	28.6432	3		1.87338	0.71464	1.28837		2.12662	1.50075	0.630777	42.0307	4		1.08383	0.77796	b2759
	b1408	ynbA	predicted inner membrane protein	0.807733		1.4632	1.68441	1.0972	1.26313	0.38834	30.7441	4		0.570467	2.08104	2.11898	0.958196	1.11676	1.36909	0.696333	50.861	5		1.08388	0.781893	b1408
	b2988	gsp	fused glutathionylspermidine amidase/glutathionylspermidine synthetase	0.746404	1.29115	0.416876	0.474043	0.845367	0.754767	0.349628	46.3226	5		1.07286	0.766503	0.815614	0.770023	0.667018	0.818403	0.152238	18.6019	5		1.08431	0.723081	b2988
	b4348	hsdS	specificity determinant for hsdM and hsdR	0.421476	1.06081		0.331672	0.800738	0.653674	0.339111	51.8777	4		0.707996	0.540563	0.537182	0.707789	1.05043	0.708791	0.208846	29.4651	5		1.08432	0.787803	b4348
	b3294	rplQ	50S ribosomal subunit protein L17	0.375377	0.642415	0.412492	0.532247	0.870426	0.566591	0.199721	35.2495	5		0.645215	0.669907	0.615073	0.71872	0.422964	0.614376	0.113536	18.4798	5		1.08434	0.657409	b3294
	b3888	yiiD	predicted acetyltransferase	0.732747		0.510674	0.692015	1.28277	0.804552	0.333106	41.4027	4		0.464817		0.885589	1.28388	0.857028	0.872828	0.334588	38.3338	4		1.08486	0.782144	b3888
	b2367	emrY	predicted multidrug efflux system	1.15349	1.03775	1.31072	0.429464	1.10182	1.00665	0.338078	33.5846	5			0.813848	1.01718		1.44698	1.09267	0.323248	29.5833	3		1.08546	0.736355	b2367
	b0266	yagB	CP4-6 prophage; conserved protein	30.2405			1.09614	0.889602	0.99287	0.146043	14.7092	3		0.669909	1.16235			1.40207	1.07811	0.373279	34.6235	3		1.08585	0.426044	b0266
	b3720	bglH	carbohydrate-specific outer membrane porin, cryptic	0.559914	0.643654	0.543217	0.790003	1.05636	0.718631	0.212568	29.5796	5			0.684848		0.864985	0.792571	0.780801	0.0906436	11.609	3		1.08651	0.58843	b3720
	b1594	dgsA	DNA-binding transcriptional repressor	0.487548		1.06898	1.01392	0.614026	0.796118	0.288827	36.2794	4		0.881439	0.693773		1.00977	0.875232	0.865053	0.129937	15.0207	4		1.08659	0.684939	b1594
	b0764	modB	molybdate transporter subunit	0.209919	0.331671	1.7446	0.0500568	3.25554	1.11836	1.37342	122.807	5		1.91019	1.00616	0.730826			1.21572	0.616976	50.7497	3		1.08706	0.895544	b0764
	b2045	wcaK	predicted pyruvyl transferase	4.24856	0.909561	0.505159		1.13036	0.84836	0.317063	37.3736	4		0.87335	1.27482	0.847875	0.823411	0.793714	0.922633	0.19907	21.5763	5		1.08755	0.434359	b2045
	b3527	yhjJ	predicted zinc-dependent peptidase	0.76234	0.83966	0.969544	0.903096	0.983099	0.891548	0.0921755	10.3388	5		1.02946	0.782859	1.21386		0.852265	0.969613	0.193121	19.9174	4		1.08756	0.497591	b3527
	b0187	yaeR	predicted lyase	0.937193	1.10591	0.677071		0.791631	0.877952	0.185544	21.1337	4		0.806616	0.973115	1.18148	1.0195	0.794033	0.954948	0.161019	16.8616	5		1.0877	0.536163	b0187
	b1966			1.14065	1.56139	1.28671	0.779656	1.15295	1.18427	0.282539	23.8576	5		1.14615	0.895863	1.56593	1.06618	1.77122	1.28907	0.365321	28.34	5		1.08849	0.626415	b1966
	b0027	lspA	prolipoprotein signal peptidase (signal peptidase II)	0.557297	0.957587	0.711811	0.92066	0.582522	0.745975	0.186265	24.9693	5		0.867132	0.729895	0.850838	0.945567	0.667958	0.812278	0.111666	13.7473	5		1.08888	0.518234	b0027
	b1068	yceM	predicted oxidoreductase with NAD(P)-binding Rossmann-fold domain	1.41832	0.798177	0.659631	0.978721	0.97154	0.965278	0.285837	29.6119	5		1.46103	1.21725	0.679976	0.976644	0.924186	1.05182	0.297922	28.3245	5		1.08965	0.651819	b1068
	b1324	tpx	lipid hydroperoxide peroxidase	38.4255		1.08742	1.20137	1.57002	1.28627	0.252252	19.6111	4			1.46065	1.3862	1.65778	1.1019	1.40163	0.230342	16.4338	4		1.08969	0.396209	b1324
	b4099	phnI	carbon-phosphorus lyase complex subunit	2.92663	1.80658		1.93828	0.938374	1.90247	0.814219	42.7981	4			3.43969	1.29073	1.48926		2.07323	1.18755	57.2802	3		1.08976	0.842713	b4099
	b3870	glnA	glutamine synthetase	1.31062		0.572036	0.642112	0.942501	0.866816	0.336687	38.8417	4		0.968864	0.856203	0.986043	0.932113	0.980654	0.944775	0.0537958	5.69403	5		1.08994	0.67667	b3870
	b2121	yehP	conserved protein	2.08659	1.55219	1.00153	1.65479	1.01551	1.46212	0.46011	31.4686	5		2.53286	1.13183	1.66857	1.04151		1.59369	0.684558	42.9542	4		1.08999	0.755008	b2121
	b3647	ligB	DNA ligase, NAD(+)-dependent	0.205372	0.405059	0.925021	0.282224	0.9438	0.552295	0.35608	64.4728	5		0.295223	0.652462	0.895036	0.42732	0.743711	0.60275	0.241413	40.0519	5		1.09136	0.80064	b3647
	b0095	ftsZ	GTP-binding tubulin-like cell division protein	0.852179	0.82735	0.989544	1.17434	1.33095	1.03487	0.215414	20.8155	5			0.923077	0.75312	1.83625	1.0069	1.12984	0.482632	42.717	4		1.09176	0.733457	b0095
	b0757	galK	galactokinase	0.495049	1.34623	0.638025	0.481712	0.994458	0.791095	0.372935	47.1416	5			1.09441	0.655644		0.841652	0.863903	0.220228	25.4922	3		1.09203	0.740381	b0757
	b2771	ygcS	predicted transporter	0.653431	0.948415	0.890845		0.854809	0.836875	0.128228	15.3223	4		3.90059	0.985689	0.842802			0.914245	0.101036	11.0513	3		1.09245	0.394209	b2771
	b0366	tauB	taurine transporter subunit	1.22899	0.940256	0.767277	1.34012	0.900398	1.03541	0.239531	23.134	5		1.26253	1.03846	0.945603	1.2818		1.1321	0.166304	14.6899	4		1.09338	0.499158	b0366
	b2832	ygdQ	predicted inner membrane protein	0.786328		1.46149	3.15156	1.1125	1.12011	0.337647	30.1442	4		0.552078	0.792963	1.69352	3.08766		1.22524	1.14784	93.6823	4		1.09386	0.905527	b2832
	b0193	yaeF	predicted lipoprotein	1.72894	0.348033	0.935433	0.938146	0.691069	0.928324	0.508469	54.7727	5		1.16408	0.903438	1.1736	0.948343	0.890431	1.01598	0.141228	13.9007	5		1.09442	0.72677	b0193
	b2745	truD	pseudoruidine synthase	1.08087	0.831495		0.959205	1.02077	0.973086	0.106665	10.9615	4		1.15077	0.941998	1.10233			1.06503	0.109268	10.2596	3		1.09449	0.322945	b2745
	b3526	kdgK	ketodeoxygluconokinase	1.2223	1.08752	0.696924	1.42079	1.03979	1.09347	0.266413	24.3641	5		0.877135	1.25026		1.42863	1.23111	1.19678	0.230917	19.2948	4		1.09449	0.553434	b3526
	b2137	yohF	predicted oxidoreductase with NAD(P)-binding Rossmann-fold domain	1.12281	0.493257	0.755072	0.906341	1.06082	0.86766	0.253359	29.2002	5			0.917461	0.772084	1.37684	0.732276	0.949666	0.295698	31.1371	4		1.09451	0.675162	b2137
	b1179	ycgL	conserved protein	1.53022	6.70923	1.2925	1.28271	1.23539	1.33521	0.132376	9.91428	5		0.958657	2.77532	1.31652	1.25252	1.00749	1.4621	0.749964	51.2935	5		1.09504	0.440444	b1179
	b3689	yidR	conserved protein	0.7514	0.422388			1.03027	0.734685	0.304284	41.4169	3		0.989852	0.597636		0.826234		0.804574	0.197003	24.4854	3		1.09513	0.75784	b3689
	b3721	bglB	cryptic phospho-beta-glucosidase B	1.72573	0.673378	0.981308	1.4161	0.922298	1.14376	0.421174	36.8236	5		1.28056	1.50987	1.23438	1.06666	1.17338	1.25297	0.164427	13.123	5		1.09548	0.611486	b3721
	b3460	livJ	leucine/isoleucine/valine transporter subunit	0.836295	0.916996	0.398517	0.842266	0.906489	0.780113	0.216416	27.7416	5		3.63539	0.898523		1.13022	0.535613	0.854784	0.299705	35.0621	4		1.09572	0.356418	b3460
	b0802	ybiJ	predicted protein	1.2861	0.73335		1.59328	0.910325	1.13076	0.384959	34.0442	4				1.4942	0.803421	1.41971	1.23911	0.37915	30.5986	3		1.09582	0.726986	b0802
	b3548	yhjY	conserved protein	0.678635	2.22069	1.05734	0.582869	0.864555	0.79585	0.209919	26.3767	5			0.987169	0.990424		0.640485	0.872693	0.201104	23.0441	3		1.09655	0.541588	b3548
	b2763	cysI	sulfite reductase, beta subunit, NAD(P)-binding, heme-binding	1.47632	0.539347	1.14255	1.27447	0.906212	1.06778	0.360749	33.785	5		1.12325		1.13658	1.25375		1.17119	0.0718083	6.13121	3		1.09685	0.56474	b2763
	b4122	fumB	anaerobic class I fumarate hydratase (fumarase B)		1.25439	0.406898		0.627301	0.762862	0.439706	57.639	3		1.30568	0.929213	0.497587	0.826107	0.625833	0.836885	0.31148	37.219	5		1.09703	0.813622	b4122
	b2173	yeiR	predicted enzyme	0.859972			0.740096	0.953103	0.851057	0.106783	12.5471	3		1.07509		0.881359	0.881486	0.899042	0.934244	0.094264	10.0899	4		1.09775	0.342879	b2173
	b3920	yiiQ	conserved protein	0.99169	1.05415	1.00368	0.92764	0.96176	0.987784	0.0473459	4.79314	5		1.13876	0.943851	1.13607		1.12135	1.08501	0.094415	8.70179	4		1.09843	0.129992	b3920
	b2400	gltX	glutamyl-tRNA synthetase	0.994613		0.813054	0.609531	1.26651	0.920928	0.278964	30.2916	4			0.828003	0.906885	0.97315	1.33863	1.01167	0.225905	22.3299	4		1.09853	0.631947	b2400
	b2776	ygcE	predicted kinase	0.710505	0.865937	0.412153	1.19878	0.902551	0.817985	0.287536	35.1517	5		1.44103	0.703017	0.821823	0.812871	0.716192	0.898986	0.307813	34.24	5		1.09902	0.678598	b2776
	b4399	creC	sensory histidine kinase in two-component regulatory system with CreB or PhoB, regulator of the CreBC regulon	0.89866	0.755259	1.52322	1.47779	0.960622	1.12311	0.352839	31.4162	5			1.40375	1.21726	1.29653	1.02061	1.23454	0.161802	13.1063	4		1.09921	0.553509	b4399
	b1885	tap	methyl-accepting protein IV	0.641452	0.538014	0.412425	0.400401	0.685703	0.535599	0.129607	24.1986	5		0.678004		0.380647	0.707629		0.58876	0.180839	30.7152	3		1.09925	0.684057	b1885
	b4244	pyrI	aspartate carbamoyltransferase, regulatory subunit	1.46084	0.65784	1.00834	0.850288	1.92994	1.18145	0.512861	43.4094	5		1.88588	1.18224	0.916123	1.40842	1.1071	1.29995	0.371972	28.6143	5		1.1003	0.687809	b4244
	b3359	argD	bifunctional acetylornithine aminotransferase/ succinyldiaminopimelate aminotransferase	0.334368	0.309119	0.346218	0.30125	0.460385	0.350268	0.0642085	18.3312	5		0.437306	0.354312	0.360586	0.381938	0.393663	0.385561	0.0330024	8.55958	5		1.10076	0.316429	b3359
	b4056	yjbQ	conserved protein	0.904504	0.903965	0.658915	1.40022	0.936834	0.960887	0.269813	28.0795	5				1.37306	0.876189	0.925004	1.05809	0.273869	25.8834	3		1.10116	0.649049	b4056
	b3521	yhjC	predicted DNA-binding transcriptional regulator		1.22298	1.61931	4.33278	0.928166	1.25682	0.34681	27.5943	4		1.20549	1.07954	1.38681	1.30521	1.94324	1.38406	0.332989	24.0589	5		1.10124	0.475411	b3521
	b3871	typA	GTP-binding protein	0.702071	0.697337	0.589342	0.952337	1.18612	0.825442	0.241644	29.2745	5		0.866608	0.795009	0.89181	0.748447	1.24508	0.909391	0.196096	21.5634	5		1.1017	0.563774	b3871
	b1919	dcyD	D-cysteine desulfhydrase, PLP-dependent		0.90832		1.43657	0.907637	1.08418	0.305184	28.1489	3		0.929688	1.11268	1.34654	1.38999		1.19472	0.214593	17.9617	4		1.10196	0.624767	b1919
	b1917	yecC	predicted transporter subunit: ATP-binding component of ABC superfamily		1.85456	1.0686		0.953546	1.29224	0.490375	37.9478	3		2.48422	1.13948	1.46731	0.927104	1.10251	1.42412	0.62393	43.8115	5		1.10206	0.752815	b1917
	b4075	nrfF	heme lyase (NrfEFG) for insertion of heme into c552, subunit NrfF	0.616236	0.72397	0.470431	0.846253	0.664735	0.664325	0.13835	20.8256	5		1.08453	0.641641	0.493017	0.716156	0.725691	0.732207	0.217856	29.7533	5		1.10218	0.575497	b4075
	b0198	metI	DL-methionine transporter subunit	1.14409	0.921927	0.414411	2.12609	1.77906	1.27711	0.682058	53.4062	5			1.94168	1.07394	1.77462	0.841235	1.40787	0.532929	37.8536	4		1.10238	0.75625	b0198
	b1889	motB	protein that enables flagellar motor rotation	0.906939		0.542378	0.618206	1.61142	0.919736	0.487139	52.965	4		0.904179	0.986091	1.08448	1.21817	0.877146	1.01401	0.139842	13.7909	5		1.10251	0.729931	b1889
	b1777	yeaC	conserved protein	1.36084	2.11313	1.20367	1.53656	1.25871	1.49458	0.368277	24.6408	5		1.08814	2.39491		1.8348	1.27781	1.64891	0.589703	35.7631	4		1.10326	0.667575	b1777
	b3289	rsmB	16S rRNA m5C967 methyltransferase, S-adenosyl-L-methionine-dependent	1.8244	0.731201	1.08111	1.37952	0.871518	1.17755	0.436287	37.0504	5		0.987924	1.27999	1.28684	1.41854	1.52683	1.30003	0.202157	15.5502	5		1.10401	0.590916	b3289
	b2132	bglX	beta-D-glucoside glucohydrolase, periplasmic	0.922722		1.21134	2.12568	1.15563	1.35384	0.529528	39.1129	4		2.29094	2.03528	0.832149	1.28764	1.02925	1.49505	0.637319	42.6286	5		1.1043	0.727382	b2132
	b2878	ygfK	predicted oxidoreductase, Fe-S subunit	1.55723	0.728789	0.908172	1.7527	1.05691	1.20076	0.436108	36.3193	5		1.06786	2.4702	1.38736	0.92075	0.785754	1.32638	0.67744	51.0742	5		1.10462	0.737846	b2878
	b0434	yajG	predicted lipoprotein	0.967545	1.09022	1.33041	0.428993	0.919091	0.947253	0.330549	34.8955	5		0.789082	0.781405	1.05848		1.55851	1.04687	0.364617	34.8293	4		1.10516	0.685542	b0434
	b2321	flk	predicted flagella assembly protein	0.375196	0.57996	0.777008	0.454251	0.824199	0.602123	0.196058	32.5612	5		0.519432	0.559396	0.687642	0.724445	0.838449	0.665873	0.128908	19.3593	5		1.10588	0.562918	b2321
	b0159	mtn	5'-methylthioadenosine/S-adenosylhomocysteine nucleosidase	0.985267	0.452304	1.03772	0.481282	0.648091	0.720933	0.276192	38.3104	5		0.765851	0.720635	0.791588	0.858416	0.850974	0.797493	0.0581273	7.28876	5		1.1062	0.574371	b0159
	b4337	mdtM	multidrug efflux system protein	2.76855	0.768468	0.569607		0.97445	0.770842	0.202432	26.2612	4		0.762118	1.06578	0.607917	0.947633	0.881749	0.853039	0.175629	20.5886	5		1.10663	0.472506	b4337
	b2529	iscU	scaffold protein	0.97682	0.977207	1.383	1.19841	1.1074	1.12857	0.170295	15.0895	5		1.10089	1.11412	1.37617	1.06669	1.59182	1.24994	0.227519	18.2024	5		1.10754	0.369705	b2529
	b2259	pmrD	polymyxin resistance protein B	0.450878	1.12344	1.5037	0.718182	0.68411	0.896062	0.417037	46.5411	5		0.941339	1.24226	1.02878	0.8661	0.884475	0.99259	0.153263	15.4407	5		1.10773	0.647411	b2259
	b2028	ugd	UDP-glucose 6-dehydrogenase		0.651476	0.905757		1.02296	0.860065	0.189911	22.081	3		0.795941		0.987691	1.07577		0.953133	0.143077	15.0113	3		1.10821	0.537649	b2028
	b0915	lpxK	lipid A 4'kinase	0.64772		0.654738	1.87686	0.955178	1.03362	0.580135	56.1264	4		1.19183	0.936983	1.26711	1.18658		1.14563	0.143878	12.5589	4		1.10836	0.730207	b0915
	b0192	nlpE	lipoprotein involved with copper homeostasis and adhesion	0.776983	0.633544	0.867526	0.842341	0.91617	0.807313	0.109337	13.5433	5		1.09869		0.859457		0.726292	0.894812	0.188699	21.0881	3		1.10838	0.519693	b0192
	b3934	cytR	DNA-binding transcriptional dual regulator	0.330134	0.724295	0.387084	0.213605	0.876723	0.506368	0.280914	55.4763	5		0.44651	0.477307	0.543973	0.680223	0.658669	0.561337	0.105066	18.717	5		1.10855	0.698593	b3934
	b2996	hybA	hydrogenase 2 4Fe-4S ferredoxin-type component	0.659418	0.984178	1.11166	0.961863	0.892606	0.921945	0.166763	18.0882	5		1.0546	1.07782	1.08524	1.11573	0.777437	1.02216	0.13854	13.5536	5		1.1087	0.332516	b2996
	b1096	pabC	4-amino-4-deoxychorismate lyase component of para-aminobenzoate synthase multienzyme complex	0.42528	1.71409	0.840812	0.726185	0.845036	0.91028	0.480705	52.8084	5		0.856027	0.795049	1.22855	0.83596	1.33183	1.00948	0.250769	24.8413	5		1.10898	0.696583	b1096
	b0029	ispH	1-hydroxy-2-methyl-2-(E)-butenyl 4-diphosphate reductase, 4Fe-4S protein	0.405012	0.675322	0.739624	0.29503	1.02137	0.627271	0.287239	45.7919	5		0.493389	0.609465			0.984711	0.695855	0.256801	36.9044	3		1.10934	0.741496	b0029
	b3578	yiaN	predicted transporter	3.33892	0.852055	1.17611	0.944834	1.06277	1.00894	0.140907	13.9659	5		0.878851	1.07749	1.3166	1.20622		1.11979	0.188012	16.7899	4		1.10987	0.496318	b3578
	b1111	ycfQ	predicted DNA-binding transcriptional regulator	0.389305	0.827789	0.44285	0.425692	0.567333	0.530594	0.179123	33.759	5		0.636926	0.834378	0.469624	0.423304	0.581245	0.589095	0.161457	27.4076	5		1.11026	0.602437	b1111
	b1847	yebF	predicted protein	0.675605	2.78319	0.678265	1.03267	0.916634	0.825793	0.178297	21.591	5		1.35438	0.78779		0.693694	0.833039	0.917227	0.297161	32.3978	4		1.11072	0.510756	b1847
	b4322	uxuA	mannonate hydrolase	0.783596	0.777954	1.27003	1.45118	1.82143	1.22084	0.448194	36.712	5			1.7338	1.23801	1.14727	1.30577	1.35621	0.259965	19.1685	4		1.11089	0.589865	b4322
	b3765	yifB	predicted bifunctional enzyme and transcriptional regulator	3.58336	0.509012	1.3458		0.955622	0.93681	0.418709	44.6952	4		0.966494	0.861219	1.5081	0.980728	0.888129	1.04093	0.266018	25.5557	5		1.11115	0.477238	b3765
	b2490	hyfJ	predicted processing element hydrogenase 4		0.864594	0.821444	0.778811	1.00666	0.867876	0.0989267	11.3987	4			0.796885	0.636245		1.46048	0.964536	0.436944	45.3009	3		1.11137	0.740742	b2490
	b0444	queC	predicted aluminum resistance protein	1.04469	1.09536	1.2397	1.18957	0.927214	1.09931	0.122956	11.1848	5			1.51797	1.18784		0.959599	1.2218	0.28073	22.9767	3		1.11143	0.535798	b0444
	b0420	dxs	1-deoxyxylulose-5-phosphate synthase, thiamine-requiring, FAD-requiring	0.424868	0.68992	0.626153	0.348811	0.814886	0.580927	0.191634	32.9875	5		0.535152		0.569192	0.708471	0.772568	0.646346	0.112707	17.4375	4		1.11261	0.545183	b0420
	b2445	yffN	CPZ-55 prophage; predicted protein	1.29398	0.931123	1.65998	1.93106	1.07858	1.37894	0.412854	29.9399	5		1.13259	2.26843	1.59731	1.14087		1.5348	0.535121	34.8658	4		1.11303	0.649812	b2445
	b4019	metH	homocysteine-N5-methyltetrahydrofolate transmethylase, B12-dependent	0.507248	0.642914	0.786171	1.43771	1.05051	0.88491	0.368765	41.6726	5		1.04411		0.940476	1.2697	0.685545	0.984959	0.242354	24.6055	4		1.11306	0.640231	b4019
	b1086	rluC	23S rRNA pseudouridylate synthase	1.47034			0.992509	0.818539	1.0938	0.337501	30.8559	3		1.89088	0.982949		0.985082	1.01101	1.21748	0.449115	36.8888	4		1.11308	0.694719	b1086
	b3664	yicO	predicted xanthine/uracil permase	0.612376	0.34387	0.867448	0.146642	1.30768	0.492584	0.314465	63.8398	5		0.317252		0.45175	0.876057		0.548353	0.291659	53.1881	3		1.11322	0.699116	b3664
	b0796	ybiH	predicted DNA-binding transcriptional regulator	0.994332	0.897544	0.72115	0.862955	1.16498	0.928192	0.164699	17.7441	5		1.02413	0.917087	1.22904	1.08944	0.90985	1.03391	0.132565	12.8217	5		1.1139	0.297398	b0796
	b2233	yfaL	adhesin	0.558859	0.67835	1.18443	0.91096	1.12632	0.891785	0.272677	30.5766	5			0.886349	1.00758	0.85611	1.22626	0.994074	0.168058	16.906	4		1.1147	0.512992	b2233
	b1258	yciF	conserved protein	2.10154		0.599132		1.38876	1.36314	0.751534	55.1324	3		0.495702	2.55058	1.45615	1.57721		1.51991	0.840365	55.2904	4		1.115	0.806119	b1258
	b1864	yebC	conserved protein			1.01903	1.39493	1.15208	1.18868	0.190605	16.0351	3		1.66551	1.71336	1.06596	1.36714	0.816365	1.32566	0.385472	29.0777	5		1.11524	0.52811	b1864
	b3229	sspA	stringent starvation protein A	0.859809	0.652824	1.28285	0.791418	0.864462	0.890272	0.235512	26.4539	5			0.939778	0.929437	1.14787	0.957374	0.993615	0.103482	10.4147	4		1.11608	0.413974	b3229
	b3562	yiaA	conserved inner membrane protein	1.87301	0.99566	0.99629	1.3917	1.05182	1.2617	0.379433	30.0732	5			2.16999	1.63782	1.02035	0.806535	1.40867	0.617921	43.8654	4		1.11649	0.694842	b3562
	b3074	ygjH	conserved protein	0.411058	0.936902	0.737634	0.463551	0.839276	0.677684	0.231215	34.1184	5		0.633828	0.773595			0.865915	0.757779	0.116849	15.4199	3		1.11819	0.540657	b3074
	b1678	ynhG	conserved protein	1.17454		1.01737	1.02525	1.06561	1.07069	0.0723816	6.76025	4		1.35657	0.949339	1.32416	1.21176	1.14661	1.19769	0.162575	13.5741	5		1.11861	0.170998	b1678
	b3077	ebgC	cryptic beta-D-galactosidase, beta subunit	2.05147	0.613949	0.979165	0.984349	1.06537	1.13886	0.539251	47.35	5		0.990688	1.5747	1.46181	1.39006	0.955139	1.27448	0.28333	22.231	5		1.11908	0.636172	b3077
	b3724	phoU	negative regulator of PhoR/PhoB two-component regulator	1.37549	1.01628		1.60233	0.733851	1.18199	0.384023	32.4896	4		1.55983		1.09914	1.34445	1.28791	1.32283	0.189641	14.336	4		1.11916	0.543698	b3724
	b3335	gspO	bifunctional prepilin leader peptidase/ methylase	0.891967	1.11708	0.629952	0.978816	1.02976	0.929514	0.186284	20.041	5		1.37253		0.823273	0.78756	1.17806	1.04036	0.283038	27.2059	4		1.11925	0.529703	b3335
	b3409	feoB	fused ferrous iron transporter, protein B: GTP-binding protein/membrane protein	0.432908	0.811936	0.606329	0.416691	0.855805	0.624734	0.205461	32.8877	5		0.786805	0.713185	0.551148	0.839969	0.605402	0.699302	0.120834	17.2792	5		1.11936	0.508573	b3409
	b4118	melR	DNA-binding transcriptional dual regulator	0.401661	0.972957	1.12913	1.17549	0.842258	0.904299	0.310363	34.3209	5		0.695916	1.06396		1.2769		1.01226	0.293921	29.0362	3		1.11938	0.645222	b4118
	b3614	yibQ	predicted polysaccharide deacetylase	0.608298	1.01841	0.967618	0.541948	0.863927	0.80004	0.214024	26.7517	5		0.691466	0.822996	1.07644	0.807598	1.07993	0.895686	0.174189	19.4476	5		1.11955	0.461503	b3614
	b2747	ispD	4-diphosphocytidyl-2C-methyl-D-erythritol synthase	1.01316	1.61691	0.664103	0.89525	0.861255	1.01014	0.361694	35.8064	5		1.11655	1.02831	1.11938	1.2594		1.13091	0.0955263	8.44687	4		1.11956	0.508069	b2747
	b2944	yggI	conserved protein	0.417492	0.373609	1.11985	0.381719	0.591114	0.576756	0.316159	54.8167	5		0.884928	0.606586	0.619395	0.542791	0.576368	0.646014	0.136793	21.1749	5		1.12008	0.670359	b2944
	b2410	yfeH	predicted inner membrane protein	0.52389	0.642595	1.02899	0.404674	1.14977	0.749985	0.32387	43.1835	5			0.542171	0.835307	0.861365	1.12146	0.840075	0.236924	28.2027	4		1.12012	0.644914	b2410
	b1580	rspB	predicted oxidoreductase, Zn-dependent and NAD(P)-binding	1.39633	0.53115	1.54987	1.32186	0.973884	1.15462	0.40743	35.287	5		0.939976			1.15441	1.78857	1.29432	0.441257	34.0919	3		1.12099	0.678446	b1580
	b2851	ygeG	predicted chaperone	3.89286			1.1032	0.722769	0.912984	0.269005	29.4644	3		1.10572	0.992431		0.786667	1.20965	1.02362	0.181171	17.6991	4		1.12118	0.470543	b2851
	b3517	gadA	glutamate decarboxylase A, PLP-dependent	0.435787	0.232529	0.31634	0.416403	0.815341	0.44328	0.22346	50.4106	5		0.642015	0.598196	0.436753		0.311127	0.497023	0.15215	30.6122	4		1.12124	0.681772	b3517
	b0001	thrL	thr operon leader peptide	0.397558	0.906376	1.29063	0.566502	0.744799	0.781173	0.342705	43.8706	5		1.1353	0.972749	0.927279	0.862154	0.483539	0.876205	0.241581	27.5712	5		1.12165	0.627469	b0001
	b1624	ydgJ	predicted oxidoreductase	0.478039			0.47548	0.934246	0.629255	0.264133	41.9755	3		0.661545		0.709302	0.580665	0.871771	0.705821	0.122713	17.3859	4		1.12168	0.676889	b1624
	b0592	fepB	iron-enterobactin transporter subunit			0.963793	11.3706	0.932232	0.948012	0.0223171	2.35409	3			1.20967	1.2649	1.27863	0.504393	1.0644	0.374525	35.1865	4		1.12277	0.435816	b0592
	b2501	ppk	polyphosphate kinase, component of RNA degradosome	1.46832	0.511384	1.33279	0.743468	0.837807	0.978754	0.405794	41.4603	5		0.986279	1.26615	1.04492			1.09912	0.147597	13.4287	3		1.12298	0.572446	b2501
	b4055	aphA	acid phosphatase/phosphotransferase, class B, non-specific	0.473443	0.811209	0.608759	0.690859	0.886028	0.694059	0.163198	23.5135	5		0.812558	0.797133	0.922593		0.588111	0.780099	0.139652	17.9018	4		1.12397	0.422768	b4055
	b2347	yfdC	predicted inner membrane protein	0.788583	1.84065	1.55774	14.7884	0.661241	1.21205	0.576586	47.571	5		1.52201	1.35192	3691.59		1.21711	1.36368	0.152787	11.204	4		1.1251	0.392154	b2347
	b3437	gntK	gluconate kinase 2		1.07429	0.747147	0.995825	1.0087	0.956489	0.143729	15.0267	4		1.22074	1.38158	1.04037	0.980769	0.758801	1.07645	0.237319	22.0465	5		1.12542	0.382061	b3437
	b1515	lsrD	AI2 transporter			1.4489	8.34852	1.12562	1.28726	0.228594	17.7583	3		1.84531	1.65792			0.845214	1.44948	0.531632	36.6774	3		1.12603	0.450876	b1515
	b1475	fdnH	formate dehydrogenase-N, Fe-S (beta) subunit, nitrate-inducible	2.07471	0.608005	1.48803	1.3056	1.17813	1.3309	0.530213	39.8388	5		1.02584	1.88994	1.72741		1.35426	1.49936	0.387226	25.826	4		1.12658	0.599267	b1475
	b3585	yiaU	predicted DNA-binding transcriptional regulator	1.38798	0.846257	1.01499	1.73368	1.07044	1.21067	0.352041	29.0782	5		0.831772	1.7912	1.43223	1.40742		1.36565	0.396776	29.0539	4		1.12802	0.562531	b3585
	b1058_			0.717869		1.5433	0.163866	1.77762	1.05066	0.745726	70.9766	4		0.14018	0.881363	1.50286		2.21795	1.18559	0.885412	74.6812	4		1.12842	0.823643	b1058_
	b1269	rluB	23S rRNA pseudouridylate synthase	1.66982		0.739453	1.37638	1.40243	1.29702	0.394661	30.4283	4		2.25636	1.36169	1.21926	1.0799	1.40321	1.46408	0.460823	31.4752	5		1.1288	0.576764	b1269
	b3719	yieL	predicted xylanase	1.22053			1.21508	1.06731	1.16764	0.0869292	7.44488	3		0.743525	1.54886			1.6625	1.31829	0.500996	38.0034	3		1.12903	0.656323	b3719
	b1900	araG	fused L-arabinose transporter subunits of ABC superfamily: ATP-binding components	0.139335	0.242332	2.04704	0.111267	1.57095	0.687961	0.705573	102.56	5			0.993467	0.835303		0.502684	0.777151	0.250506	32.2338	3		1.12964	0.921673	b1900
	b3706	mnmE	GTPase		0.521118	1.21958	0.871161	0.932059	0.885979	0.286796	32.3705	4		1.10386	0.926609		1.08802	0.889916	1.0021	0.109576	10.9347	4		1.13107	0.49294	b3706
	b2762	cysH	3'-phosphoadenosine 5'-phosphosulfate reductase	0.892361	0.662559	0.722639	1.29137	0.814587	0.876704	0.247814	28.2665	5		0.954031	0.9443	1.07886			0.992398	0.0750393	7.56141	3		1.13197	0.374909	b2762
	b2566	era	membrane-associated, 16S rRNA-binding GTPase	0.627556	1.02332	0.758318	1.24319	0.773314	0.88514	0.246086	27.802	5		0.806102	0.90529	0.881715	1.17056	1.24622	1.00198	0.193813	19.343	5		1.132	0.429747	b2566
	b2331	yfcN	conserved protein	1.4976	0.754176	0.600837	1.98487	0.953945	1.15829	0.573191	49.4861	5		1.36555		1.35194		1.21728	1.31159	0.0819584	6.24877	3		1.13236	0.586173	b2331
	b0556	rzpD	DLP12 prophage; predicted murein endopeptidase	0.623454	1.16701	0.837724	0.510833	0.821871	0.792178	0.250538	31.6265	5		16.3116	0.869303	0.82171	0.749481	1.14888	0.897342	0.174775	19.4769	5		1.13275	0.359748	b0556
	b2575	yfiC	predicted S-adenosyl-L-methionine-dependent methyltransferase	0.473658		0.357801	0.208851	0.542173	0.395621	0.145923	36.8846	4		0.539164	0.475252	0.297142	0.358288	0.571277	0.448225	0.117321	26.1746	5		1.13297	0.580534	b2575
	b4092	phnP	carbon-phosphorus lyase complex accessory protein	0.838739	0.606052	0.308913	1.01583	0.724794	0.698865	0.265226	37.9509	5		1.03903	0.858324	0.531129	0.863876	0.671138	0.7927	0.195735	24.6922	5		1.13427	0.543711	b4092
	b3943	yijE	predicted permease	0.393416	0.444235	0.282979	0.770513	0.674092	0.513047	0.202609	39.4914	5		0.649555	0.887763	0.323249	0.755692	0.295072	0.582266	0.263393	45.2358	5		1.13492	0.654592	b3943
	b2955	yggW	predicted oxidoreductase	0.985909	0.6119	1.31962	1.31342	1.07469	1.06111	0.290739	27.3996	5			1.22631		1.27182	1.11537	1.2045	0.0804705	6.68081	3		1.13514	0.347284	b2955
	b0766	ybhA	predicted hydrolase	0.913181	0.794788	0.828928	0.847633	1.12083	0.901073	0.130191	14.4485	5		1.39873		0.969503	0.852986	0.871431	1.02316	0.255549	24.9764	4		1.1355	0.431051	b0766
	b2820	recB	exonuclease V (RecBCD complex), beta subunit	1.86108	1.04074	1.56741		1.34425	1.45337	0.347085	23.8815	4			2.14044		1.11245	1.69835	1.65041	0.515671	31.245	3		1.13558	0.603768	b2820
	b2125	yehT	predicted response regulator in two-component system withYehU	0.865835	1.12082	0.746543	0.477902	0.763141	0.794848	0.231889	29.174	5		0.895853	0.959482	0.684188	1.01816	0.955547	0.902647	0.12956	14.3534	5		1.13562	0.397671	b2125
	b3921	yiiR	conserved inner membrane protein	1.50686	1.01215	1.28804	0.856289	0.923656	1.1174	0.272759	24.4102	5		0.940873	1.78881	1.4168	1.06581	1.13361	1.26918	0.33887	26.6999	5		1.13583	0.458728	b3921
	b1277	ribA	GTP cyclohydrolase II	0.772585		0.943758	1.01366	4.70665	0.910001	0.124032	13.6299	4				0.997715	0.947499	1.15627	1.03383	0.108971	10.5406	3		1.13607	0.4495	b1277
	b1905	ftnA	ferritin iron storage protein (cytoplasmic)	2.02252	1.07755	2.25845	0.850015	1.63183	1.56807	0.600715	38.3091	5		1.4205		1.68759	1.75069	2.27194	1.78268	0.356189	19.9805	4		1.13686	0.528127	b1905
	b0080	fruR	DNA-binding transcriptional dual regulator	1.00601	0.495408	1.17324	0.420613	0.619173	0.742887	0.329714	44.3827	5		0.717507	0.810696	0.999424	0.851689	0.843563	0.844576	0.101642	12.0346	5		1.13688	0.540451	b0080
	b1432	ydcM	predicted transposase	0.417377			0.429689	0.8978	0.581622	0.273888	47.0903	3		0.577179	0.700459	1.0136	0.391819	0.624782	0.661567	0.227308	34.3591	5		1.13745	0.694312	b1432
	b0629	ybeF	predicted DNA-binding transcriptional regulator	1.13771	1.20514	1.5805	2.06428	0.955802	1.38869	0.440818	31.7435	5		2.70523		1.23708	0.797352		1.57989	0.999071	63.2368	3		1.13769	0.778273	b0629
	b2128	yehW	predicted transporter subunit: membrane component of ABC superfamily		1.37819	0.767671		0.860075	1.00198	0.329069	32.8419	3		1.25207	1.47693	0.691548			1.14018	0.404469	35.474	3		1.13793	0.670946	b2128
	b2425	cysP	thiosulfate transporter subunit			1.21904	1.96583	0.735451	1.30677	0.619862	47.4346	3		2.544	0.739531	1.23619	1.42863		1.48709	0.762073	51.246	4		1.13798	0.744444	b2425
	b1544	ydfK	Qin prophage; predicted DNA-binding transcriptional regulator	3.64619	0.889862	0.925198	1.83692	1.10159	1.18839	0.442157	37.2064	5		1.08718	1.34696	1.39836	1.19899	1.73056	1.35241	0.244451	18.0752	5		1.13802	0.568783	b1544
	b0220	ivy	inhibitor of vertebrate C-lysozyme	1.06614	0.898297	0.510434	0.506218	0.697102	0.735639	0.245217	33.3339	5			0.696695	0.977412	0.887073	0.788205	0.837346	0.121503	14.5105	4		1.13826	0.447844	b0220
	b4021	pepE	(alpha)-aspartyl dipeptidase	0.621966	0.881332		0.546778	1.00582	0.763975	0.215719	28.2364	4		0.965146	0.872012		0.771833		0.869664	0.0966781	11.1167	3		1.13834	0.429524	b4021
	b3673	emrD	multidrug efflux system protein	1.40294		1.14756	5.11982	1.30116	1.28389	0.12856	10.0133	4		1.85858	1.2295	0.719326	2.03953		1.46174	0.60455	41.3583	4		1.13852	0.485797	b3673
	b2939	yqgB	predicted protein		1.21565	1.47934	0.62814	1.06426	1.09685	0.356448	32.4975	4		0.449074	1.11228	1.63761	1.02097	2.02438	1.24886	0.604733	48.4228	5		1.13859	0.65399	b2939
	b1715	pheM	phenylalanyl-tRNA synthetase operon leader peptide	4.11892	1.14353	1.77716	1.65188	1.04172	1.40357	0.365048	26.0085	5		0.527141	2.9971	1.55079	1.32121		1.59906	1.03006	64.4164	4		1.13928	0.662018	b1715
	b3453	ugpB	glycerol-3-phosphate transporter subunit	0.777519		0.410067	0.964036	0.85934	0.752741	0.240865	31.9984	4		0.772572	0.852016	0.776087	1.20102	0.688574	0.858054	0.200258	23.3386	5		1.13991	0.509643	b3453
	b0465	kefA	fused conserved protein	0.925206		0.511424	1.15029	0.979677	0.891649	0.271011	30.3943	4			1.13564	0.951363	0.962881		1.01663	0.103229	10.154	3		1.14017	0.44555	b0465
	b2801	fucP	L-fucose transporter	1.40202			4.40405	1.34084	1.37143	0.0432639	3.15466	3				1.81917	2.34041	0.537542	1.56571	0.927776	59.256	3		1.14166	0.526288	b2801
	b2654				1.24148		0.938274	0.823657	1.00114	0.215888	21.5643	3		1.38692	0.82363			1.219	1.14319	0.289199	25.2976	3		1.14189	0.535664	b2654
	b3550	yiaC	predicted acyltransferase with acyl-CoA N-acyltransferase domain	0.438602	0.382249	0.677543		0.903631	0.600506	0.239213	39.8352	4		0.668242	0.646958	0.511156	1.12045	0.482752	0.685912	0.256159	37.3457	5		1.14222	0.622505	b3550
	b1906	yecH	predicted protein		0.978777	1.1259	1.47682	1.07263	1.16353	0.217536	18.6961	4		1.62233	1.37296	1.23247	1.09277		1.33013	0.225903	16.9835	4		1.14318	0.328973	b1906
	b0675	nagD	UMP phosphatase	0.907619	1.21814	1.00577	1.02055	0.841144	0.998645	0.143005	14.3199	5		1.30158	0.941906	1.29174	1.03662	1.13718	1.1418	0.157364	13.7821	5		1.14335	0.170965	b0675
	b4071	nrfB	nitrite reductase, formate-dependent, penta-heme cytochrome c	1.0553		0.38982	0.523695	0.74327	0.67802	0.290673	42.8708	4		1.09012		0.72997	0.736326	0.548046	0.776115	0.226809	29.2236	4		1.14468	0.614847	b4071
	b3064	ygjD	predicted peptidase	0.613007	0.873567	0.570517		0.706116	0.690802	0.13436	19.4499	4		0.944516	0.768049		0.763203	0.688684	0.791113	0.108528	13.7184	4		1.14521	0.291378	b3064
	b4166	yjeS	predicted Fe-S electron transport protein	0.394696	0.58632	0.367927	0.811653	0.826967	0.597513	0.21936	36.7122	5		0.640856	0.88886	0.684447	0.524742		0.684727	0.151866	22.1791	4		1.14596	0.505002	b4166
	b0548	ninE	DLP12 prophage; conserved protein		1.20748	0.985992	1.85766	1.10054	1.28792	0.390446	30.3161	4		1.25734	1.42861	1.74366			1.47654	0.246675	16.7064	3		1.14645	0.47078	b0548
	b2317	dedA	conserved inner membrane protein	0.973954	0.809344	1.04	1.2862	1.00006	1.02191	0.171856	16.8171	5		0.625751	0.815446	1.24636	1.3408	1.83774	1.17322	0.475063	40.4923	5		1.14806	0.532554	b2317
	b3256	accC	acetyl-CoA carboxylase, biotin carboxylase subunit	1.3313	0.706035	1.38697	0.953965	0.689869	1.01363	0.3329	32.8425	5			1.20607	1.0299	1.25782		1.1646	0.119487	10.2599	3		1.14894	0.39675	b3256
	b4402	yjjY	predicted protein	0.463409	0.579562	0.597145	0.376082	0.615194	0.526279	0.102809	19.5351	5		0.664557	0.620314	0.562985	0.494033	0.681536	0.604685	0.077003	12.7344	5		1.14898	0.212258	b4402
	b3726	pstA	phosphate transporter subunit	1.20598		0.72079		0.871075	0.932615	0.248379	26.6326	3			1.60414	0.823114	0.956711	0.902886	1.07171	0.359167	33.5134	4		1.14915	0.571436	b3726
	b2548	yphF	predicted sugar transporter subunit: periplasmic-binding component of ABC superfamily	1.30614	0.395874		1.42767	0.586213	0.928972	0.514013	55.3313	4		1.42947	1.11389	0.835352	0.893914		1.06816	0.269073	25.1904	4		1.14983	0.653632	b2548
	b0148	hrpB	predicted ATP-dependent helicase	1.26444	1.43548	0.475458	0.986374	0.880862	1.00852	0.370382	36.7252	5		2.11033	0.957248	0.787233	1.04103	0.903881	1.15995	0.539199	46.4848	5		1.15014	0.620495	b0148
	b1879	flhA	predicted flagellar export pore protein	1.1774			1.52517	1.11495	1.27251	0.221027	17.3694	3		9.85532	2.01995	0.954517	1.41937		1.46461	0.534157	36.4708	4		1.15097	0.357282	b1879
	b0735	ybgE	conserved inner membrane protein		0.843876	1.26516	1.1875	1.07022	1.09169	0.183616	16.8194	4		1.12336	0.999543	1.44294	0.992495	1.72426	1.25652	0.318987	25.3865	5		1.15099	0.365937	b0735
	b0440	hupB	HU, DNA-binding transcriptional regulator, beta subunit		0.945577		0.326076	0.516654	0.596103	0.3173	53.2291	3		0.980668	2.45228	0.968007	0.897662	0.586291	0.686526	0.184886	26.9306	5		1.15169	0.173929	b0440
	b4152	frdC	fumarate reductase (anaerobic), membrane anchor subunit	0.760787	1.144	0.642531	0.349301	0.912955	0.761915	0.297198	39.0067	5		1.06198	0.785145	0.801446	0.918775	0.820822	0.877633	0.115391	13.148	5		1.15188	0.452686	b4152
	b3817	yigF	conserved inner membrane protein			1.03808	0.959699	1.19133	1.06304	0.117815	11.0829	3		1.63945	0.917991	1.00094	1.59054	0.973588	1.2245	0.358138	29.2477	5		1.15189	0.394247	b3817
	b4218	ytfL	predicted inner membrane protein	0.860554	0.65147	1.19749	0.59844	1.10573	0.882737	0.266269	30.164	5		0.808865	1.61303	1.17996	0.880725	0.607922	1.0181	0.390846	38.3897	5		1.15335	0.542376	b4218
	b2305	yfcI	conserved protein	1.67928	0.488028	0.697108	1.06387	0.680142	0.921686	0.471964	51.2066	5		1.07893	1.13652	1.12348	1.03947	0.943789	1.06444	0.0775735	7.28775	5		1.15488	0.539295	b2305
	b4354	yjiY	predicted inner membrane protein	0.74024	0.711826	0.80815	0.808255	0.760544	0.765803	0.0423971	5.5363	5			0.739785	0.957521		0.958124	0.885143	0.125885	14.2219	3		1.15584	0.237988	b4354
	b2958	yggN	predicted protein	0.400764	0.876168	0.584044	0.512018	0.755951	0.625789	0.190364	30.4199	5		0.777025	0.549653	0.602056	0.703988	0.986333	0.723811	0.171244	23.6586	5		1.15664	0.41716	b2958
	b3292	zntR	DNA-binding transcriptional activator in response to Zn(II)	0.796938	0.720125	1.64623	1.32187	1.02005	1.10104	0.3841	34.8851	5			1.09372	1.34766	1.24782	1.40942	1.27466	0.137779	10.8091	4		1.15768	0.389624	b3292
	b2768	ygcP	predicted anti-terminator regulatory protein	0.655361	0.505688	1.11239	0.948893	0.684732	0.781412	0.244364	31.272	5		0.667556		1.05118	0.991849	0.909062	0.904912	0.16863	18.6349	4		1.15805	0.401	b2768
	b3517	gadA	glutamate decarboxylase A, PLP-dependent	0.279532	0.298269	0.935082	0.34836	1.12222	0.596692	0.400624	67.1409	5		0.232674	0.399752	1.05899	1.29107	0.475761	0.691648	0.457359	66.126	5		1.15914	0.736091	b3517
	b1896	otsA	trehalose-6-phosphate synthase	1.22174		0.801119	3.61194	0.896148	1.4595	0.220592	15.1142	4		2.86933	1.97088	1.18237	0.745962		1.69214	0.934271	55.2125	4		1.15939	0.944424	b1896
	b2564	pdxJ	pyridoxine 5'-phosphate synthase	0.817068	0.804178	0.591788	0.497546	1.20482	0.783081	0.272759	34.8315	5		0.841309	0.727205	0.846254	1.10956	1.0181	0.908485	0.153047	16.8464	5		1.16014	0.402949	b2564
	b1095	fabF	3-oxoacyl-[acyl-carrier-protein] synthase II	0.373738	0.938507	0.784628	0.332572	0.60577	0.607043	0.260371	42.8917	5		0.620368	0.801095	0.692799			0.704754	0.0909549	12.9059	3		1.16096	0.476673	b1095
	b0342	lacA	thiogalactoside acetyltransferase	1.40199	0.93987	1.27234	1.87213	1.31195	1.35966	0.335614	24.6837	5		1.17203	2.32444		1.62741	1.19207	1.57899	0.539554	34.1709	4		1.16131	0.510441	b0342
	b4383	deoB	phosphopentomutase	1.19147	2.69436	1.06449	0.670007	1.19656	1.36338	0.774433	56.8025	5		1.90918	1.23297	1.5628	1.64632	1.56628	1.58351	0.241665	15.2613	5		1.16146	0.571721	b4383
	b1766	sppA	protease IV (signal peptide peptidase)	0.651675	0.533558	1.18374	1.11647	0.846358	0.866361	0.283078	32.6744	5			1.20665	1.04615	0.766053		1.00628	0.222985	22.1593	3		1.1615	0.471681	b1766
	b1528	ydeA	predicted arabinose transporter	0.811874	1.33325	0.775807	4.02456	0.940006	0.965235	0.255261	26.4455	5		1.15935	1.03615	1.28676	1.03886	1.08468	1.12116	0.105136	9.37743	5		1.16154	0.503481	b1528
	b3816	corA	magnesium/nickel/cobalt transporter	0.283983	0.504062	0.776847	0.858238	0.600642	0.604754	0.227442	37.609	5		1.10483	0.592152	0.559735	0.781667	0.473921	0.70246	0.251466	35.7979	5		1.16156	0.537557	b3816
	b3744	asnA	asparagine synthetase A	0.671435	0.414137	0.685283	0.993884	0.783603	0.709668	0.209547	29.5275	5		0.91609	0.99311	0.823406	0.883788	0.505433	0.824365	0.188506	22.8668	5		1.16162	0.389739	b3744
	b2258	yfbJ	predicted inner membrane protein		0.303459	1.59774	1.64984	0.835253	1.09657	0.646682	58.973	4		1.15908		1.32163	1.34177		1.27416	0.100167	7.86144	3		1.16195	0.624236	b2258
	b0213	yafS	predicted S-adenosyl-L-methionine-dependent methyltransferase	1.06231	0.60602	0.59769	1.454	1.03191	0.950387	0.35909	37.7836	5		1.02827		1.19426		1.09165	1.10473	0.0837618	7.58213	3		1.1624	0.402371	b0213
	b3108			0.709375	0.662609	0.438777	0.923328	0.732082	0.693234	0.173493	25.0266	5		1.02655	1.03498	0.659223	0.766307	0.54214	0.805841	0.220124	27.3161	5		1.16244	0.396595	b3108
	b1178	ycgK	predicted protein	2.52808	10.5799	1.63624	1.44651	1.68602	1.82421	0.480456	26.3377	5		3.15326	1.62596	1.6193	1.80103	2.40484	2.12088	0.660543	31.1448	5		1.16263	0.458755	b1178
	b2685	emrA	multidrug efflux system	1.35258	0.865345	1.34851	0.896089	0.926104	1.07773	0.249977	23.1949	5			1.94345	0.939532	1.31673	0.817904	1.2544	0.506078	40.3441	4		1.16394	0.556463	b2685
	b3385	gph	phosphoglycolate phosphatase	1.47176	0.974339	1.07346	1.04947	1.04098	1.122	0.198947	17.7314	5		0.997963	1.25541	1.23128	1.66787	1.38847	1.3082	0.245336	18.7537	5		1.16595	0.225451	b3385
	b2665	ygaU	predicted protein	0.641696	0.943446	0.578422	0.847954	1.09581	0.821466	0.213444	25.9833	5		1.07326	0.777388	1.1216	0.873754	0.945841	0.958369	0.141347	14.7487	5		1.16666	0.27102	b2665
	b2696	csrA	pleiotropic regulatory protein for carbon source metabolism	0.278049	0.883907	1.35011	0.451758	1.01582	0.795929	0.432972	54.3983	5		0.822843		0.928877	0.775984	1.18978	0.929371	0.185013	19.9074	4		1.16766	0.558318	b2696
	b1102	fhuE	ferric-rhodotorulic acid outer membrane transporter	0.382971	0.387442	0.586901	0.530324	0.652184	0.507965	0.120083	23.6399	5			0.512178	0.506142	0.629172	0.725239	0.593183	0.104677	17.6467	4		1.16776	0.293688	b1102
	b3059	ygiH	conserved inner membrane protein	0.383735	0.355628	0.281481	0.362883	0.616266	0.399998	0.126914	31.7287	5		0.56786	0.552122	0.393812	0.344712	0.478426	0.467386	0.0972872	20.8152	5		1.16847	0.37542	b3059
	b0208	yafC	predicted DNA-binding transcriptional regulator	1.60801	1.34437	0.934228	1.5549	1.16383	1.32107	0.27925	21.1382	5			1.3525		1.55795	1.72182	1.54409	0.18505	11.9844	3		1.16882	0.225274	b0208
	b0507	gcl	glyoxylate carboligase			0.438705	0.758748	0.726422	0.641291	0.176188	27.4739	3		1.11954		0.524335	0.83161	0.523359	0.749711	0.286072	38.1577	4		1.16907	0.564253	b0507
	b2065	dcd	2'-deoxycytidine 5'-triphosphate deaminase	0.787947		0.797837	1.00895	0.724072	0.829702	0.12389	14.9319	4		0.934011	1.0237	1.1369	1.0108	0.745724	0.970229	0.144914	14.9361	5		1.16937	0.161398	b2065
	b3601	mtlR	DNA-binding repressor	0.606289	0.667051	1.05034	1.18235	1.072	0.915606	0.260395	28.4396	5		0.861865	1.20366	1.14716			1.0709	0.183217	17.1088	3		1.1696	0.364027	b3601
	b2881	xdhD	fused predicted xanthine/hypoxanthine oxidase: molybdopterin-binding subunit/Fe-S binding subunit	0.400281	0.3898	0.561344	0.375009	0.684126	0.482112	0.135809	28.1696	5		0.601328	0.638911	0.523801	0.471725	0.584644	0.564082	0.0662605	11.7466	5		1.17002	0.27221	b2881
	b3343	yheL	predicted intracellular sulfur oxidation protein	0.350987	1.7011	0.480563		0.708126	0.810194	0.612008	75.5384	4		0.907457	0.962789	0.754369	1.12	0.996121	0.948147	0.133468	14.0767	5		1.17027	0.686119	b3343
	b3377	yhfT	predicted inner membrane protein	0.40151		0.53673	0.480388	0.661994	0.520155	0.109622	21.0749	4		0.69631	0.646954		0.649549	0.44862	0.610358	0.110185	18.0525	4		1.17342	0.289852	b3377
	b2900	yqfB	conserved protein	1.44958		0.858801	0.532733	0.979087	0.955051	0.379805	39.7681	4			0.975058	1.04014	1.18762	1.2817	1.12113	0.139164	12.4129	4		1.17389	0.460049	b2900
	b0421	ispA	geranyltranstransferase	0.770713	0.844137	0.823465	0.546804	0.707194	0.738462	0.119523	16.1854	5		0.99864	0.785016	0.638211	0.900532	1.01252	0.866984	0.157079	18.1178	5		1.17404	0.186111	b0421
	b3072	aer	fused signal transducer for aerotaxis sensory component/methyl accepting chemotaxis component	0.407131	0.836655	0.782196	0.732223	0.896494	0.73094	0.191092	26.1434	5		1.07279	0.72601	0.860752	0.774748		0.858576	0.153292	17.8542	4		1.17462	0.302961	b3072
	b1663	mdtK	multidrug efflux system transporter	0.672847	0.493981	1.03191	0.425555	0.538089	0.632476	0.240875	38.0845	5		0.813781	0.620402	0.750748	0.755806	0.77648	0.743443	0.0731169	9.8349	5		1.17545	0.371967	b1663
	b2092	gatC	galactitol-specific enzyme IIC component of PTS	0.460955	0.463197	0.589601	0.785123	0.817973	0.62337	0.171179	27.4603	5		0.658847	0.932203	0.729641	0.805379	0.53808	0.73283	0.148681	20.2886	5		1.17559	0.312424	b2092
	b3639	dfp	fused 4'-phosphopantothenoylcysteine decarboxylase/phosphopantothenoylcysteine synthetase, FMN-binding	0.648624	0.766714	0.985826	0.586066	0.878656	0.773177	0.163486	21.1447	5		0.92206	1.24604		0.722256	0.746107	0.909116	0.241644	26.5801	4		1.17582	0.37924	b3639
	b2517	yfgB	predicted enzyme	0.598502	0.838072	0.369048	0.591953	1.52104	0.783724	0.444306	56.6917	5		0.993583	0.750121	0.835717	0.857011	1.17123	0.921532	0.164658	17.8678	5		1.17584	0.543751	b2517
	b0931	pncB	nicotinate phosphoribosyltransferase	0.305247	0.959492	0.319472	0.282357	0.509395	0.354118	0.104641	29.5498	5		0.433821	0.358116	0.347011	0.436232	0.506841	0.416404	0.065361	15.6965	5		1.17589	0.674697	b0931
	b0631	ybeD	conserved protein	0.878762	7.62872	0.909003	1.20302	1.05327	1.01101	0.148938	14.7316	5		1.58003	1.09991	1.48101	0.780713	1.00824	1.18998	0.333723	28.0444	5		1.17702	0.43788	b0631
	b2061	wzb	protein-tyrosine phosphatase	0.802682	1.13491	1.76005	2.54244	1.07409	1.46283	0.697915	47.7098	5		1.0258	1.73684	2.40318			1.72194	0.688812	40.0021	3		1.17713	0.633	b2061
	b1860	ruvB	ATP-dependent DNA helicase, component of RuvABC resolvasome	1.20823	0.498763	0.943947	0.366221	0.728338	0.7491	0.338549	45.1941	5		0.861351	0.756822	0.944469	0.936185	0.911051	0.881976	0.0771011	8.74187	5		1.17738	0.436131	b1860
	b0171	pyrH	uridylate kinase	0.693043	0.778558	1.06301	0.762601	0.878136	0.835069	0.143552	17.1904	5		1.30428	0.646302	0.872878	1.10955		0.983252	0.285614	29.0479	4		1.17745	0.395073	b0171
	b1018	ycdO	conserved protein	0.756677	1.52793	1.00977		1.10464	1.09975	0.321016	29.1898	4		1.01523	1.01067	1.50507	1.36833	1.57789	1.29544	0.26863	20.7366	5		1.17793	0.367278	b1018
	b1135	rluE	23S rRNA pseudouridine synthase	1.42011	0.908392	0.966704	1.02198	1.12406	1.08825	0.201823	18.5457	5		1.03078	1.42296	1.21654	1.36972	1.38564	1.28513	0.162521	12.6463	5		1.18091	0.129477	b1135
	b1184	umuC	DNA polymerase V, subunit C	4.21538	0.889044	0.966861		1.0142	0.717526	0.0631943	8.80724	4		4.85879	0.834286	0.756275	0.889209	0.910385	0.847539	0.0687769	8.1149	5		1.1812	0.918415	b1184
	b1748	astC	succinylornithine transaminase, PLP-dependent	0.733291	1.30828		0.603259	0.966242	0.902769	0.309247	34.2554	4			1.35819	0.949818		0.891726	1.06658	0.254211	23.8342	3		1.18145	0.477716	b1748
	b3551	bisC	biotin sulfoxide reductase	0.509141		0.46197	0.269239	0.753233	0.498395	0.199079	39.9439	4		0.485204	0.391892	0.487267	0.950957	0.629153	0.588895	0.219431	37.2615	5		1.18158	0.538493	b3551
	b0368	tauD	taurine dioxygenase, 2-oxoglutarate-dependent	1.56828	0.45131	0.496229	1.3559	1.03628	0.981601	0.50102	51.0411	5		0.95331	1.12565		1.94791	0.61609	1.16074	0.565843	48.7485	4		1.1825	0.63692	b0368
	b1752	ydjZ	conserved inner membrane protein	0.795694	2.7328	0.68637	0.364037	0.637086	0.620797	0.183557	29.568	5		0.745932	1.10482	0.578116	0.752231	0.489607	0.734141	0.235589	32.0905	5		1.18258	0.518208	b1752
	b1013	rutR	predicted DNA-binding transcriptional regulator	0.572151	2.88301	0.602215	0.545652	0.790553	0.627643	0.111038	17.6912	5		0.836424	0.618892	0.665984	0.595057	0.999252	0.743122	0.171475	23.0749	5		1.18399	0.503642	b1013
	b3203	hpf	predicted ribosome-associated, sigma 54 modulation protein	0.54325	0.758177	0.77662	1.18898	1.07521	0.868448	0.26069	30.0179	5		0.87084	1.22414	1.0689	0.909608	1.07077	1.02885	0.142025	13.8043	5		1.1847	0.27115	b3203
	b1874	cutC	copper homeostasis protein	0.332287	1.33217	0.480699	1.22587	0.848985	0.844003	0.441021	52.2536	5		0.795268	1.08175	1.09701	0.847597	1.17868	1.00006	0.168198	16.8187	5		1.1849	0.492086	b1874
	b0938	ycbQ	predicted fimbrial-like adhesin protein	1.23359	1.16614	1.27089	1.07611	0.970414	1.14343	0.121814	10.6534	5		1.15489	1.17762	1.31288	1.40587	1.72377	1.35501	0.230142	16.9846	5		1.18504	0.118499	b0938
	b4135	yjdC	predicted transcriptional regulator	0.508536	0.952361	0.616862	0.43898	0.710953	0.645538	0.200423	31.0474	5		1.10648	0.610001	0.708055	0.612443	0.788846	0.765165	0.204767	26.7612	5		1.18531	0.377856	b4135
	b2991	hybF	protein involved with the maturation of hydrogenases 1 and 2	0.560658	1.22641	0.649508	0.598222	0.809611	0.768882	0.272821	35.4828	5		0.901961	0.846215	0.688827	1.14886	0.971741	0.91152	0.168748	18.5128	5		1.18551	0.354791	b2991
	b3405	ompR	DNA-binding response regulator in two-component regulatory system with EnvZ	1.77994	0.955	1.51997	1.14071	1.08497	1.29612	0.342523	26.4268	5		1.79021	2.18221		1.2091	0.964885	1.5366	0.552341	35.9457	4		1.18554	0.482158	b3405
	b4262	yjgQ	conserved inner membrane protein	0.301384	0.413239	0.330624	0.423526	0.609826	0.41572	0.120477	28.9802	5			0.472532	0.424504	0.589248	0.487774	0.493514	0.0692833	14.0388	4		1.18713	0.266777	b4262
	b2414	cysK	cysteine synthase A, O-acetylserine sulfhydrolase A subunit	0.821143	0.954447	1.26779	0.527522	1.41588	0.997356	0.354236	35.5175	5		0.912829	1.98386	0.959011	0.960903	1.10631	1.18458	0.452697	38.2158	5		1.18772	0.488354	b2414
	b0600	ybdL	methionine aminotransferase, PLP-dependent	2.26881	0.409491	1.01552	0.830134	0.693905	0.737261	0.255189	34.6131	5		0.866878	0.761075	1.02537	1.04814	0.676893	0.875671	0.161924	18.4914	5		1.18774	0.63525	b0600
	b4175	hflC	modulator for HflB protease specific for phage lambda cII repressor	0.262629	0.575154	0.373749	0.234646	0.409385	0.371113	0.135551	36.5255	5		0.552361	0.358794	0.409126	0.431527	0.453544	0.441071	0.0714532	16.2	5		1.18851	0.346301	b4175
	b0323	yahI	predicted carbamate kinase-like protein	0.813985	0.406575	0.508496	0.393867	0.570805	0.538746	0.17041	31.6309	5		0.502851		0.663332	0.727153	0.667967	0.640326	0.0961447	15.015	4		1.18855	0.299752	b0323
	b1280	yciM	conserved protein	0.424089	2.22249	0.593261		0.722386	0.579912	0.149596	25.7963	4		0.740728	0.727886	0.712194	0.577855		0.689666	0.0754485	10.9399	4		1.18926	0.521821	b1280
	b3668	uhpB	sensory histidine kinase in two-component regulatory sytem with UhpA	0.799684	0.346099	0.723843	0.869524	0.914591	0.730748	0.226833	31.0411	5		0.880805	0.836312	0.823325	1.21361	0.591243	0.869058	0.223157	25.678	5		1.18927	0.359558	b3668
	b1413	hrpA	ATP-dependent helicase			0.977103	0.496189	0.977846	0.817046	0.277871	34.0092	3		0.63926	1.06562	0.891736	0.991714	1.2712	0.971905	0.232288	23.9002	5		1.18954	0.466637	b1413
	b0103	coaE	dephospho-CoA kinase	1.08717	0.436035	0.971943	0.806359	0.87454	0.83521	0.246932	29.5653	5		0.911026	0.849528	0.967086	1.23196	1.01185	0.99429	0.146138	14.6977	5		1.19047	0.257998	b0103
	b1117	lolD	outer membrane-specific lipoprotein transporter subunit	0.97185		0.507333	0.883294	1.12419	0.871666	0.262475	30.1118	4		1.08751	0.972819	0.844291	1.11791	1.16677	1.03786	0.129606	12.4878	5		1.19066	0.308764	b1117
	b0451	amtB	ammonium transporter	0.310881	0.327329	0.62409	0.390179	0.638274	0.458151	0.160782	35.0936	5		0.360551	0.613853	0.509264	0.665002	0.5806	0.545854	0.118008	21.6189	5		1.19143	0.356754	b0451
	b1754	ynjB	conserved protein	0.694136	1.42763	0.552984	0.486078	0.596986	0.751562	0.385413	51.2816	5		1.38025	0.696854	0.613051			0.896718	0.420842	46.9314	3		1.19314	0.651501	b1754
	b1355	ydaG	Rac prophage; predicted protein			1.12785	3.54526	0.76448	0.946164	0.256939	27.1559	3		29.2562	0.947919	1.0795	1.32683	1.16142	1.12892	0.158565	14.0458	5		1.19315	0.432265	b1355
	b0801	ybiC	predicted dehydrogenase	0.897636	0.879704	0.989656	0.961169	1.10108	0.965849	0.0879625	9.10728	5		0.92934	1.04582	1.20857	1.45427	1.12728	1.15306	0.1975	17.1284	5		1.19383	0.105108	b0801
	b0242	proB	gamma-glutamate kinase	1.16635	0.400418	1.12997	0.554228	0.852775	0.820748	0.340511	41.488	5		0.73283	0.910327	1.23927	1.07446	0.944933	0.980364	0.189288	19.3079	5		1.19448	0.393537	b0242
	b3370	frlA	predicted fructoselysine transporter			1.35052	1.52882	0.930034	1.26979	0.307448	24.2125	3		1.04273	1.95223	1.77491	1.29401	1.52119	1.51701	0.364218	24.0088	5		1.19469	0.351773	b3370
	b0376	ampH	beta-lactamase/D-alanine carboxypeptidase	0.58301	0.878425	0.648194	0.611516	0.775432	0.699315	0.124221	17.7632	5		0.886073	0.810653	0.716805	0.982176	0.782345	0.83561	0.101984	12.2047	5		1.1949	0.095908	b0376
	b3447	ggt	gamma-glutamyltranspeptidase	0.573257		0.453199	0.288642	0.777955	0.523263	0.206012	39.3706	4		0.916421	0.536192	0.341459	0.663726	0.671735	0.625907	0.21029	33.5977	5		1.19616	0.487001	b3447
	b3895	fdhD	formate dehydrogenase formation protein	1.30933	0.638722	1.01131	1.06994	1.11868	1.0296	0.245425	23.837	5		1.13189		1.45217	1.00377	1.3428	1.23266	0.202371	16.4175	4		1.19722	0.216095	b3895
	b3008	metC	cystathionine beta-lyase, PLP-dependent	0.943928		0.485331	0.716562	0.944157	0.772495	0.21943	28.4054	4		1.00723	0.967454	0.732676	0.940387	0.977878	0.925125	0.110211	11.9131	5		1.19758	0.270148	b3008
	b0386	proC	pyrroline-5-carboxylate reductase, NAD(P)-binding	1.1398	0.527975	0.724368	1.13245	1.0788	0.920677	0.278664	30.2673	5		0.854993	1.73207	0.966182	0.965652	0.996351	1.10305	0.355737	32.2503	5		1.19809	0.394648	b0386
	b1730	ydjO	predicted protein		2.90861		0.851506	0.98554	0.918523	0.0947764	10.3184	3		0.762276	1.03194	1.49757	0.912607	1.30301	1.10148	0.297098	26.9726	5		1.19919	0.547035	b1730
	b0063	araB	L-ribulokinase	0.359493	2.29204	0.288943		0.828147	0.492194	0.293074	59.5444	4		0.406039	0.714453	0.51002	1.72224	0.730723	0.590309	0.158671	26.8793	5		1.19934	0.820406	b0063
	b3398	yrfF	predicted inner membrane protein	0.40992		0.781826		0.84844	0.680062	0.236309	34.7482	3			0.678163	0.7804	0.873575	0.930498	0.815659	0.11059	13.5584	4		1.19939	0.432632	b3398
	b3745	viaA	predicted von Willibrand factor containing protein	0.285599	0.704936	0.328957	0.279761	0.564528	0.432756	0.191887	44.3406	5		0.64386	0.495449		0.503815	0.434016	0.519285	0.0886891	17.0791	4		1.19995	0.405632	b3745
	b3637	rpmB	50S ribosomal subunit protein L28	0.397064	1.52765	0.977691	0.238496	0.880693	0.623486	0.361064	57.9105	5		0.956017	0.567374	0.575822	0.724241	0.918339	0.748358	0.183795	24.5597	5		1.20028	0.826908	b3637
	b4019	metH	homocysteine-N5-methyltetrahydrofolate transmethylase, B12-dependent	0.816964	1.1543	0.949386	0.23746	0.929696	0.817562	0.346361	42.3651	5		0.765105	1.22893	1.05216	0.950477	0.910359	0.981406	0.172527	17.5796	5		1.20041	0.381068	b4019
	b0207	dkgB	2,5-diketo-D-gluconate reductase B	0.77765		0.925313	25.2709	1.04527	0.916079	0.13405	14.6331	4		1.1897	1.17771		0.910523	1.12213	1.10002	0.129713	11.7919	4		1.20079	0.403709	b0207
	b2428	murQ	predicted PTS component	1.0238	1.03353	1.09957	0.795373	1.21055	1.03256	0.152075	14.7279	5		0.590674	1.51906	1.31466	1.07003	1.70622	1.24013	0.433396	34.9476	5		1.20102	0.358887	b2428
	b0170	tsf	protein chain elongation factor EF-Ts	0.587409	1.1463	0.559525	0.308802	0.894759	0.699358	0.325021	46.4742	5			0.649039	0.639617	1.06702	1.00682	0.840625	0.228025	27.1256	4		1.20199	0.469662	b0170
	b1993	cobU	bifunctional cobinamide kinase/ cobinamide phosphate guanylyltransferase	1.66152	0.463263	1.21506	1.23378	0.792306	1.07319	0.459065	42.7758	5		1.2375	1.20237	1.21643	1.43519	1.35974	1.29025	0.102216	7.92223	5		1.20226	0.355469	b1993
	b3293	yhdN	conserved protein	0.814825	0.96064	1.12798	0.861025	1.10353	0.973599	0.140325	14.413	5			1.24329		1.03584	1.23262	1.17058	0.116811	9.97887	3		1.20232	0.0848021	b3293
	b3982	nusG	transcription termination factor	0.434312	0.777553	0.639952	0.433843	0.669094	0.590951	0.152107	25.7394	5		0.769614	0.526173	0.587199	0.864284	0.80564	0.710582	0.146095	20.5599	5		1.20244	0.240387	b3982
	b1261	trpB	tryptophan synthase, beta subunit	1.66584	0.5144	1.22219	1.09126	0.85832	1.0704	0.427825	39.9686	5		1.07372	1.56287	1.23693	1.49263	1.07014	1.28726	0.230984	17.9439	5		1.20259	0.356214	b1261
	b4126	yjdI	conserved protein	4.03907	0.680417	0.945286	2.43464	0.803023	1.21584	0.819707	67.419	5			1.46682	1.35656	2.10221	0.925316	1.46273	0.486152	33.236	4		1.20306	0.665056	b4126
	b0274	insB	IS1 transposase InsAB'	0.299119	0.879474	1.07731	1.12342	0.7398	0.823823	0.331467	40.2352	5		1.01363	0.904751	1.16261	0.932644	0.944634	0.991653	0.103625	10.4498	5		1.20372	0.331411	b0274
	b1326	mpaA	murein peptide amidase A		0.740438	0.755628	1.83839	1.12707	1.11538	0.514097	46.0916	4		0.842302	2.21707		0.917888	1.39373	1.34275	0.631927	47.0622	4		1.20385	0.59771	b1326
	b0074	leuA	2-isopropylmalate synthase	0.672255	0.795911	0.440756	0.914484	0.741316	0.712945	0.176103	24.7008	5		1.11409	0.707642	0.71989	1.15532	0.596184	0.858626	0.257007	29.9323	5		1.20434	0.330144	b0074
	b1913	uvrC	excinuclease UvrABC, endonuclease subunit	0.978988	0.78673	0.580907	0.537535	0.723258	0.721484	0.176187	24.4201	5		1.03538	0.902086	0.74235	0.861736	0.803566	0.869023	0.110849	12.7556	5		1.20449	0.158668	b1913
	b4154	frdA	fumarate reductase (anaerobic) catalytic and NAD/flavoprotein subunit	0.489155	0.465195	0.450372	0.462411	0.85527	0.544481	0.174305	32.0131	5		0.637325	0.672165	0.537661		0.776669	0.655955	0.0986157	15.0339	4		1.20473	0.269192	b4154
	b4352	yjiA	predicted GTPase	2.43305			0.642865	0.876958	0.759911	0.165529	21.7827	3		1.00345		0.836438	0.899539	0.922643	0.915518	0.0690213	7.53905	4		1.20477	0.548619	b4352
	b3532	bcsB	regulator of cellulose synthase, cyclic di-GMP binding	0.855851	0.803126	0.755903	2.10117	0.968894	1.09699	0.566928	51.6804	5		2.71448	1.02735	1.09623	0.895511	0.875227	1.32176	0.783947	59.3109	5		1.2049	0.618813	b3532
	b3911	cpxA	sensory histidine kinase in two-component regulatory system with CpxR	0.346774	1.16941	1.1632	1.31607	0.97728	0.994546	0.381544	38.3637	5		0.985894			1.22507	1.38568	1.19888	0.201178	16.7804	3		1.20546	0.360472	b3911
	b2532	trmJ	predicted methyltransferase	0.6158	0.889652	1.00756	0.449886	0.777079	0.747995	0.220585	29.4901	5		0.656603	0.686785	0.82698	1.09499	1.24333	0.901737	0.257834	28.593	5		1.20554	0.341336	b2532
	b2794	queF	conserved protein	0.76268	0.531401	1.14646	0.456538	0.752026	0.729822	0.268895	36.8439	5		0.896166	0.752659	0.911564	0.782593	1.05688	0.879972	0.120673	13.7133	5		1.20574	0.301415	b2794
	b1697	ydiQ	conserved protein	3.71396	0.777599	0.603938		0.74422	0.708586	0.0921515	13.005	4		0.804	0.866704	0.889832	0.916074	0.795383	0.854399	0.0529944	6.20254	5		1.20578	0.479839	b1697
	b3951	pflD	predicted formate acetyltransferase 2 (pyruvate formate lyase II)	0.789836	0.68203	0.185438	0.50716	0.684422	0.569777	0.237596	41.6998	5			0.88978	0.681289		0.490019	0.687029	0.199942	29.1024	3		1.20579	0.488356	b3951
	b3933	ftsN	essential cell division protein	0.556713	1.73883	0.520849	0.642303	0.786243	0.848987	0.507831	59.8161	5			1.37814	0.760173	1.03796	0.918989	1.02381	0.262196	25.6097	4		1.20593	0.52901	b3933
	b1128	ycfD	conserved protein		1.41322	0.54003		0.845236	0.932828	0.443136	47.5045	3		12.1415	1.05381	1.28683	1.17492	0.984432	1.125	0.133551	11.8713	5		1.20601	0.339572	b1128
	b0871	poxB	pyruvate dehydrogenase (pyruvate oxidase), thiamin-dependent, FAD-binding	1.01564	1.05527	1.04993	1.79262	1.06869	1.19643	0.333854	27.9041	5		1.52753	1.4358		1.32383	1.48592	1.44327	0.0880161	6.09838	4		1.20631	0.177622	b0871
	b1786	yeaJ	predicted diguanylate cyclase	0.707853	0.972845	0.67215	0.502805	0.956058	0.762342	0.200188	26.2595	5		0.928357	0.893537	0.875672		0.981522	0.919772	0.0466184	5.06847	4		1.20651	0.155551	b1786
	b3686	ibpB	heat shock chaperone	1.00655	0.671317	1.411	1.17837	0.857873	1.02502	0.285428	27.8461	5			1.16378	1.19428	3.40368	1.35216	1.23674	0.101114	8.17582	4		1.20655	0.261383	b3686
	b2114	metG	methionyl-tRNA synthetase	0.641989	0.639353	0.824877	0.511895	0.794399	0.682502	0.127868	18.7352	5		0.869412	0.89689	0.737271	0.831539	0.785156	0.824054	0.0641537	7.78514	5		1.2074	0.0697101	b2114
	b2807	ygdD	conserved inner membrane protein	1.31719		0.65384	1.00509	1.10787	1.021	0.277089	27.139	4		1.32706	0.977896			1.39408	1.23301	0.223463	18.1234	3		1.20765	0.314475	b2807
	b2221	atoD	acetyl-CoA:acetoacetyl-CoA transferase, alpha subunit	1.40015	0.846545	1.30839	1.18066	1.40072	1.22729	0.231126	18.8322	5		1.056	2.91099	1.19084	1.16844	1.08776	1.4828	0.800313	53.9729	5		1.20819	0.525395	b2221
	b3916	pfkA	6-phosphofructokinase I	0.60878	0.78535	0.489978	0.517932	0.941612	0.66873	0.191279	28.6034	5		0.909223	0.684334		0.806867	0.834655	0.808769	0.0935392	11.5656	4		1.20941	0.200671	b3916
	b2239	glpQ	periplasmic glycerophosphodiester phosphodiesterase	1.0933	0.612847	0.782275	0.945333	0.84269	0.855288	0.179599	20.9987	5		0.96162	1.20693	1.00511	1.00983	0.990045	1.03471	0.0980984	9.48078	5		1.20978	0.0961455	b2239
	b3190	yrbA	predicted DNA-binding transcriptional regulator	2.10626	2.79655	1.03629	0.842594	0.952321	1.5468	0.863827	55.846	5		2.52325	1.60069	1.39951	1.88415	1.95263	1.87205	0.426507	22.7829	5		1.21027	0.47962	b3190
	b2669	stpA	DNA binding protein, nucleoid-associated	2.17063	1.53497	1.48938	0.808449	1.19519	1.43972	0.501017	34.7995	5		1.56485	2.557	1.67965	1.17018		1.74292	0.584942	33.561	4		1.21059	0.441999	b2669
	b0234	yafP	predicted acyltransferase with acyl-CoA N-acyltransferase domain		2.84972	1.04923		0.822923	0.936076	0.160022	17.095	3			1.14595	1.26964	0.86665	1.25491	1.13429	0.186758	16.4648	4		1.21175	0.56492	b0234
	b4006	purH	fused IMP cyclohydrolase/phosphoribosylaminoimidazolecarboxamide formyltransferase	0.575303	0.814659	0.372815		0.844187	0.651741	0.221525	33.9897	4		1.03151	0.776879	0.669046	0.877591	0.595618	0.79013	0.172183	21.7917	5		1.21234	0.34709	b4006
	b1645	ydhK	conserved inner membrane protein	0.320587		0.524161	0.341104	0.63401	0.454966	0.150407	33.0591	4		0.540617	0.475144	0.458619	0.417888	0.865652	0.551584	0.181052	32.824	5		1.21236	0.411067	b1645
	b3052	rfaE	fused heptose 7-phosphate kinase/heptose 1-phosphate adenyltransferase	0.761969		0.471853	0.619702	0.844049	0.674393	0.163775	24.2847	4		1.13297	0.822436	0.577377	0.89846	0.660056	0.81826	0.21711	26.5332	5		1.21333	0.294676	b3052
	b3525	yhjH	EAL domain containing protein involved in flagellar function	1.11504	6.5009	0.382504		0.869585	0.789042	0.372849	47.2534	4		1.43004	0.894868	1.048	0.854145	0.566621	0.958737	0.315782	32.9373	5		1.21506	0.446274	b3525
	b3996	nudC	NADH pyrophosphatase	0.711095	0.74171			0.799254	0.750686	0.0447601	5.96256	3			0.824174	0.783837	1.01384	1.02792	0.912443	0.126421	13.8552	4		1.21548	0.078214	b3996
	b2937	speB	agmatinase	0.854049	1.86861	0.642775	1.07431	1.07008	1.10196	0.464177	42.1227	5		1.40022	1.20302	1.12322	1.34338	1.62834	1.33964	0.195278	14.5769	5		1.21568	0.336393	b2937
	b1661	cfa	cyclopropane fatty acyl phospholipid synthase (unsaturated-phospholipid methyltransferase)	0.472144	0.982706	0.607265	0.331246	1.00052	0.678777	0.301862	44.4714	5		0.88622	0.607028		0.80903	0.998602	0.82522	0.164977	19.9919	4		1.21575	0.388386	b1661
	b2679	proX	glycine betaine transporter subunit	1.07051	1.51237	1.14284	0.996191	1.2448	1.19334	0.200582	16.8084	5		1.22371	4.72013	1.90182	1.54215	1.13583	1.45088	0.347631	23.96	5		1.21581	0.245136	b2679
	b3325	gspD	general secretory pathway component, cryptic	0.568031	0.308888	0.239676	0.608315	0.683183	0.481619	0.195269	40.5443	5		0.781952	0.648316	0.46648	0.542937	0.489467	0.585831	0.130133	22.2134	5		1.21638	0.353916	b3325
	b2656				16.1153	1.45584		0.949649	1.20274	0.357931	29.7595	3		2.75641	0.963181	1.01612	0.934532	1.6476	1.46357	0.78035	53.3183	5		1.21686	0.443655	b2656
	b4219	msrA	methionine sulfoxide reductase A	0.587079	0.732798	0.75838	0.596332	1.17462	0.769843	0.239197	31.0709	5		0.827603	1.04126	0.733435	1.08134	1.00036	0.936799	0.149268	15.9338	5		1.21687	0.228825	b4219
	b0928	aspC	aspartate aminotransferase, PLP-dependent	0.64317	1.5427	0.881302	0.376586	0.894883	0.867728	0.432478	49.8403	5		1.01165	1.09209	1.00397	1.11815		1.05646	0.0572694	5.42086	4		1.21751	0.38692	b0928
	b3266	acrF	multidrug efflux system protein	1.37304		1.30828	1.17199	0.930547	1.19596	0.195781	16.3702	4		1.23309	2.37326	0.766529			1.45763	0.826563	56.7061	3		1.21879	0.641216	b3266
	b3936	rpmE	50S ribosomal subunit protein L31	0.503391	0.939567	0.924624	0.32964	0.658346	0.671113	0.265157	39.51	5		0.873851	0.70845			0.871588	0.817963	0.0948477	11.5956	3		1.21882	0.308392	b3936
	b3750	rbsC	D-ribose transporter subunit	0.870972	1.0579	0.581224		1.18642	0.924129	0.262741	28.4312	4		1.75055	1.43422	0.643587	1.1087	0.696392	1.12669	0.475039	42.1623	5		1.21919	0.446507	b3750
	b0239	frsA	hydrolase, binds to enzyme IIA(Glc)	1.15846	0.343411	0.673756	0.671085	0.71224	0.71179	0.290826	40.8583	5		0.884244	0.727649	1.06022	0.949279	0.717805	0.86784	0.146694	16.9034	5		1.21924	0.325827	b0239
	b0113	pdhR	DNA-binding transcriptional dual regulator	0.13489	0.264173	0.501218	0.429856	0.678934	0.401814	0.210747	52.4488	5		0.712969		0.44674		0.310635	0.490114	0.204644	41.7543	3		1.21975	0.587388	b0113
	b2942	metK	methionine adenosyltransferase 1	0.425988	0.612869	1.10148	0.284253	0.804962	0.64591	0.321362	49.7534	5		0.576633	0.525705	0.927886	0.650706	1.26106	0.788398	0.306463	38.8716	5		1.2206	0.49353	b2942
	b4146	yjeK	predicted lysine aminomutase	0.55579	2.1455		0.274826	0.75248	0.527698	0.240063	45.4925	4		0.694766	0.580421	0.515104	0.533167	0.897517	0.644195	0.157946	24.5184	5		1.22076	0.541607	b4146
	b3656	yicI	predicted alpha-glucosidase		0.696451	1.02056	0.417155	0.622154	0.689079	0.250568	36.3628	4		0.483521	0.944479	1.21153	0.840146	0.726858	0.841307	0.268711	31.9397	5		1.22092	0.410603	b3656
	b2812	ygdL	conserved protein	0.507853	0.757585	0.371517	0.337424	0.496946	0.494265	0.165224	33.4281	5		0.707024	0.507346		0.596818		0.603729	0.100018	16.5667	3		1.22147	0.287786	b2812
	b3499	yhiR	predicted DNA (exogenous) processing protein	1.49004	1.02509	0.675515	0.582956	1.04982	0.964685	0.359246	37.2398	5		1.51017	0.896645	0.917333	1.47802	1.08968	1.17837	0.298017	25.2906	5		1.22151	0.336935	b3499
	b0424	yajL	conserved protein	0.777645	0.742595		0.676877	1.37419	0.892828	0.323617	36.2463	4		1.68484	0.779982	1.1231	0.777975		1.09148	0.427549	39.1717	4		1.22249	0.488689	b0424
	b1429	tehA	potassium-tellurite ethidium and proflavin transporter	1.42788	0.998572	0.745261	1.11222	0.924538	1.04169	0.253757	24.36	5		1.13773	1.37241	1.17108		1.4169	1.27453	0.140551	11.0277	4		1.22352	0.128612	b1429
	b2675	nrdE	ribonucleoside-diphosphate reductase 2, alpha subunit	0.879798	1.12227	0.32233		0.738665	0.765767	0.335396	43.7987	4		3.22044	0.948454	1.16964	0.783559	0.848738	0.937598	0.168904	18.0146	5		1.22439	0.25646	b2675
	b0607	uspG	universal stress protein UP12	1.43757		0.629379	0.672579	0.779481	0.879753	0.377194	42.875	4			0.912255	0.906585	1.25983	1.23013	1.0772	0.194128	18.0215	4		1.22443	0.399261	b0607
	b1464	yddE	conserved protein		7.51904	0.832915	0.86433	0.944196	0.88048	0.0573716	6.51594	4		1.2428	0.991535	1.41128	0.808764	0.936659	1.07821	0.244016	22.6317	5		1.22457	0.44367	b1464
	b3660	yicL	predicted inner membrane protein		2.83395	0.945122	16.2527	0.967514	1.58219	1.08411	68.5192	4		1.19838	2.31323		2.30444		1.93868	0.641134	33.0706	3		1.22531	0.437013	b3660
	b2836	aas	fused 2-acylglycerophospho-ethanolamine acyl transferase/acyl-acyl carrier protein synthetase	0.76462	1.53158	0.424506	0.676232	0.98718	0.876823	0.417821	47.6517	5		1.50942	0.922937	0.943928	1.0734	0.924266	1.07479	0.25087	23.3413	5		1.22578	0.395892	b2836
	b1200	dhaK	dihydroxyacetone kinase, N-terminal domain	0.539394	1.37885	0.656211	0.501576	0.936691	0.802543	0.364473	45.4147	5		0.913566	0.766195	0.966006	1.03979	1.23314	0.983739	0.171688	17.4526	5		1.22578	0.3554	b1200
	b3782			0.652658	0.617971	0.786895	0.515224	0.797514	0.674053	0.11917	17.6796	5		0.827487	0.808024	0.837595	0.974107	0.685731	0.826589	0.102554	12.4069	5		1.2263	0.0626174	b3782
	b1052			0.499524	1.19685	1.98072	0.189034	4.50242	0.966533	0.796708	82.4294	5		0.333351	0.800326	1.66889	0.895988	2.22942	1.18559	0.755275	63.7043	5		1.22665	0.585248	b1052
	b2151	galS	DNA-binding transcriptional repressor	1.1146		1.13084		0.887947	1.04446	0.13579	13.0009	3		1.39815		1.6918	1.28552	0.751247	1.28168	0.392912	30.656	4		1.22712	0.326595	b2151
	b2238			1.16046			1.46794	1.07408	1.23416	0.207016	16.7738	3		2.06983	0.958458	2.84585	0.751461	0.950154	1.51515	0.907026	59.8637	5		1.22768	0.537872	b2238
	b3129	sohA	predicted regulator	0.709719	0.589339	0.751005	0.912805	0.970657	0.786705	0.154834	19.6814	5		0.990486	0.75961	0.92458	0.996994	1.15865	0.966065	0.144038	14.9098	5		1.22799	0.0946646	b3129
	b4039	ubiC	chorismate pyruvate lyase	0.694652	0.707695	0.908809	0.593247	0.785796	0.73804	0.117485	15.9185	5		1.16143	0.887672	0.592461		0.985426	0.906748	0.238184	26.2679	4		1.22859	0.262129	b4039
	b4069	acs	acetyl-CoA synthetase	0.593524		0.49441	0.887503	1.0349	0.752584	0.251567	33.4271	4		0.983596	1.00057	0.504175	1.21016		0.924626	0.298638	32.2983	4		1.2286	0.413053	b4069
	b3582	sgbU	predicted L-xylulose 5-phosphate 3-epimerase	0.490035	0.323789	1.02517		0.48769	0.581671	0.305736	52.5617	4		0.947205	0.650945	0.549105	0.91744	0.50978	0.714895	0.205329	28.7216	5		1.22904	0.48825	b3582
	b4042	dgkA	diacylglycerol kinase	0.757818	51.0686	0.848277	0.698498	0.83805	0.785661	0.0708	9.01152	5		1.14725	0.8681		0.895177	0.952792	0.965831	0.125999	13.0457	4		1.22932	0.381668	b4042
	b3178	hflB	protease, ATP-dependent zinc-metallo	1.04383	0.774043	1.04983	0.819014	0.921829	0.921709	0.126174	13.6891	5		4.42325	0.876401	1.29775	1.05226	1.30592	1.13308	0.207692	18.3298	5		1.22933	0.260438	b3178
	b4392	slt	lytic murein transglycosylase, soluble	0.518829	0.400913	0.526439		0.92963	0.593953	0.231045	38.8996	4		0.800447	0.641997	0.794126	0.787929	0.626636	0.730227	0.0878338	12.0283	5		1.22944	0.331347	b4392
	b3557	insJ	IS150 protein InsA	0.33219	0.585914		3.21914	0.882518	0.600207	0.275442	45.8912	4		0.691475	0.807005	0.466658	0.585167	1.13939	0.73794	0.257405	34.8815	5		1.22947	0.496096	b3557
	b3422	rtcR	sigma 54-dependent transcriptional regulator of rtcBA expression	0.444728	0.40251	1.35087	0.726757	0.691947	0.723362	0.379257	52.4298	5		0.572453		1.03526	0.944827	1.00668	0.889805	0.214908	24.1523	4		1.2301	0.436644	b3422
	b1488	ddpX	D-ala-D-ala dipeptidase, Zn-dependent	0.985353	0.688052			0.548437	0.740614	0.22315	30.1304	3		0.965305	0.87831	1.00469	0.888159	0.819633	0.911219	0.0735953	8.07657	5		1.23036	0.315073	b1488
	b4231	yjfF	predicted sugar transporter subunit: membrane component of ABC superfamily	1.41814	4.20708	1.04049		0.647613	1.03541	0.385287	37.2109	4		0.897016	1.67603	1.27312		1.25237	1.27463	0.318439	24.9827	4		1.23104	0.546481	b4231
	b4038			1.34824	0.725007			1.20671	1.09332	0.326724	29.8837	3			1.93405	1.54104	0.906772	1.00211	1.34599	0.481326	35.7599	4		1.23111	0.446299	b4038
	b1962	yedJ	predicted phosphohydrolase	3.13074			0.79286	0.910744	0.851802	0.0833567	9.78592	3		0.972064	0.649171	1.38736	0.739889	1.49574	1.04885	0.379276	36.1612	5		1.23133	0.539195	b1962
	b1525	yneI	predicted aldehyde dehydrogenase	1.53686	0.604054	0.570441	0.836043	0.783049	0.866089	0.391726	45.2293	5		0.963142	0.97152	1.48123	1.12129	0.796445	1.06673	0.25867	24.2489	5		1.23166	0.371347	b1525
	b4243	yjgF	ketoacid-binding protein	1.2655	1.41625		0.887462	2.03136	1.40014	0.475978	33.9949	4		1.77066	1.67838		1.6054	1.8499	1.72608	0.106704	6.18186	4		1.23279	0.266082	b4243
	b3150	yraP	predicted protein	0.739798		0.7335	0.770689	1.0557	0.824922	0.154709	18.7544	4			1.10483	1.0777	1.04636	0.839497	1.0171	0.120786	11.8755	4		1.23296	0.100768	b3150
	b1501	ydeP	predicted oxidoreductase		0.513027	0.582772	1.66221	1.06782	0.956458	0.531276	55.5462	4		0.952059	1.7851	1.42407	0.742801	0.993456	1.1795	0.41941	35.5583	5		1.23319	0.519787	b1501
	b3448	yhhA	conserved protein	0.757184			0.641154	0.751106	0.716481	0.065306	9.11483	3		1.00369	1.27785	0.668758	0.793991	0.67403	0.883664	0.258825	29.2899	5		1.23334	0.23049	b3448
	b2628	yfjL	CP4-57 prophage; predicted protein	1.64534	1.11048	1.40892	1.3533	0.910131	1.28563	0.283219	22.0295	5		1.06709	1.5205	2.12731		1.63309	1.587	0.435425	27.437	4		1.23441	0.285663	b2628
	b2983	yghQ	predicted inner membrane protein	0.484314	0.641149		0.696159	0.551825	0.593362	0.0939282	15.8298	4		1.29088	0.723549	0.424555	0.646617	0.580873	0.733295	0.330553	45.0778	5		1.23583	0.410098	b2983
	b0432	cyoA	cytochrome o ubiquinol oxidase subunit II	1.20751	0.584579	1.02955	0.62086	0.82486	0.853472	0.26626	31.1973	5		0.871853	0.875182	0.959387	1.33892	1.22931	1.05493	0.215647	20.4418	5		1.23605	0.22655	b0432
	b3514	mdtF	multidrug transporter, RpoS-dependent	0.42661		1.02089		1.08269	0.843399	0.36227	42.9536	3		0.698459	0.961943	1.4702			1.04353	0.392285	37.592	3		1.23729	0.551827	b3514
	b1572	ydfB	Qin prophage; predicted protein			1.10941	1.249	1.07	1.1428	0.0940567	8.23035	3		5.29259	2.05366	1.20352	1.49371	0.905075	1.41399	0.489497	34.6181	5		1.2373	0.260385	b1572
	b3334	gspM	general secretory pathway component, cryptic	1.55443	0.840275	1.05984	0.362891	1.74349	1.11219	0.555032	49.9046	5		1.24215	0.891817		1.4451	1.92581	1.37622	0.431825	31.3776	4		1.2374	0.448608	b3334
	b3235	degS	serine endoprotease, periplasmic	1.27844	0.414902	0.728184	0.568341	0.785015	0.754976	0.326387	43.2315	5			41.4641	0.635318	1.81537	0.352612	0.934433	0.775898	83.0341	4		1.2377	0.38396	b3235
	b2329	aroC	chorismate synthase	0.514517	0.864569	0.894368	1.04284	0.868755	0.837009	0.194566	23.2454	5		0.910089	1.26539	0.886843	1.1879	0.930809	1.03621	0.176678	17.0505	5		1.23799	0.128908	b2329
	b3035	tolC	transport channel		1.1152	1.03763		1.03215	1.06166	0.0464487	4.3751	3		1.03344	1.41294	1.76269	1.0489		1.31449	0.34646	26.357	4		1.23814	0.240943	b3035
	b2960	trmI	tRNA (m7G46) methyltransferase, SAM-dependent	0.878488	1.05577		0.553535	1.14475	0.908137	0.261027	28.7431	4		1.06009	1.05397	0.988762	1.03595	1.48346	1.12444	0.202633	18.0207	5		1.23819	0.225515	b2960
	b0185	accA	acetyl-CoA carboxylase, carboxytransferase, alpha subunit	1.07577	0.644529	0.957767	0.609641	0.860733	0.829687	0.200392	24.1527	5		0.985383	0.898577	1.05854	1.15384	1.04149	1.02756	0.0942267	9.1699	5		1.2385	0.0952924	b0185
	b1194	ycgR	protein involved in flagellar function	0.890226	0.389665		0.641735	0.560465	0.620523	0.20824	33.5589	4		0.764634	1.00924	0.579069	0.732842	0.759408	0.769039	0.154278	20.0612	5		1.23934	0.283829	b1194
	b0483	ybaQ	predicted DNA-binding transcriptional regulator	0.386371	0.495728	0.373504	0.0962897	0.405513	0.351481	0.150459	42.8071	5		0.547171	0.336647	0.31902	0.369224	0.60632	0.435676	0.131702	30.2294	5		1.23954	0.374462	b0483
	b4314	fimA	major type 1 subunit fimbrin (pilin)	1.0355	0.957542	2.16424	1.02205	0.987043	1.23328	0.521316	42.2708	5		0.822472	2.63575	1.42171	1.23877		1.52968	0.778848	50.9159	4		1.24034	0.542294	b4314
	b2831	mutH	methyl-directed mismatch repair protein	0.389362	0.318158	0.563478	0.336016	0.571295	0.435662	0.123099	28.2556	5		0.473261		0.715472	0.515822	0.45769	0.540561	0.119167	22.0451	4		1.24078	0.238989	b2831
	b1782	mipA	scaffolding protein for murein synthesizing machinery	2.0437	1.38669	1.50207	0.793541	1.4758	1.44036	0.444505	30.8606	5		1.74708	1.81543	1.67925	1.54259	2.15505	1.78788	0.228694	12.7913	5		1.24127	0.171232	b1782
	b1073	flgB	flagellar component of cell-proximal portion of basal-body rod	0.752013	1.31838	1.21591	0.99654	1.15668	1.0879	0.221023	20.3164	5		1.2651		1.23743	1.40225	1.49822	1.35075	0.121896	9.02434	4		1.24161	0.0615883	b1073
	b1740	nadE	NAD synthetase, NH3/glutamine-dependent			1.1972	1.44361	2.21144	1.61742	0.528984	32.7055	3		3.95389	1.10546	1.55666	1.48767	1.93946	2.00863	1.12697	56.1064	5		1.24187	0.531904	b1740
	b3455	livG	leucine/isoleucine/valine transporter subunit			1.25367	1.0822	0.766041	1.03397	0.247368	23.924	3			1.23763	1.58956	1.30947	1.00125	1.28448	0.242287	18.8626	4		1.24228	0.24603	b3455
	b1904	yecR	predicted protein	61.8388	0.814526		0.51767	0.940195	0.757464	0.216965	28.6436	4		0.832565	0.726294	1.16785	0.939714	1.04101	0.941486	0.172713	18.3447	5		1.24295	0.396024	b1904
	b2025	hisF	imidazole glycerol phosphate synthase, catalytic subunit with HisH	0.96386	5.76321	0.636444	0.693356	1.10339	0.849263	0.221596	26.0927	5		1.12508	0.958541	0.884161	1.25761		1.05635	0.167773	15.8824	4		1.24384	0.476557	b2025
	b0951	pqiB	paraquat-inducible protein B	0.65537	1.22798	0.916725	0.616281	0.886512	0.860573	0.245254	28.499	5		0.675825	1.14064	1.10498	1.12889	1.30545	1.07116	0.23478	21.9184	5		1.2447	0.202954	b0951
	b3574	yiaJ	predicted DNA-binding transcriptional repressor	0.703857	0.994443	1.34146	1.05763	1.02172	1.02382	0.226539	22.1268	5		1.20393		1.21066		1.4095	1.2747	0.116793	9.1624	3		1.24504	0.0850366	b3574
	b4187	aidB	isovaleryl CoA dehydrogenase	1.32744		0.592573		0.652709	0.857573	0.408024	47.5789	3		1.78171	1.0541	0.518663	0.927254	1.0619	1.06872	0.45585	42.6536	5		1.24622	0.529337	b4187
	b3866	yihI	conserved protein	0.880051		0.629937	0.604254	0.758964	0.718301	0.12732	17.7252	4		0.948258	0.82796	0.861617	0.973919	0.864555	0.895262	0.0624499	6.9756	5		1.24636	0.0613897	b3866
	b2095	gatZ	D-tagatose 1,6-bisphosphate aldolase 2, subunit	1.29024		2.13566	3.71896	0.996008	1.47397	0.591625	40.1382	4		3.42672	1.85478	1.11519	1.58059	1.21181	1.83782	0.9361	50.9354	5		1.24685	0.799451	b2095
	b0433	ampG	muropeptide transporter	0.519805	0.48083	0.478956	0.711573	0.544149	0.547063	0.0959695	17.5427	5				0.71601	0.593879	0.73646	0.682116	0.0770967	11.3026	3		1.24687	0.0785957	b0433
	b1427	rimL	ribosomal-protein-L7/L12-serine acetyltransferase	0.779716	0.489697	0.71723	0.527	0.576687	0.618066	0.124948	20.216	5		0.920035	0.680999			0.711024	0.770686	0.130209	16.8951	3		1.24693	0.175464	b1427
	b3924	fpr	ferredoxin-NADP reductase	0.615628	0.694747	0.570946	0.516761	0.865713	0.652759	0.13572	20.7918	5		1.10567	0.766518	0.534339	0.873083	0.790698	0.814061	0.205894	25.2922	5		1.24711	0.18743	b3924
	b1099	holB	DNA polymerase III, delta prime subunit	0.45626	0.554609	0.709966	1.12589	0.863747	0.742094	0.264566	35.6513	5		0.831228	0.799807	0.789783	1.08327	1.12464	0.925744	0.164051	17.7209	5		1.24748	0.230533	b1099
	b2811	csdE	predicted Fe-S metabolism protein		0.819219	0.408903	0.303651	0.636491	0.542066	0.23116	42.6442	4		1.03284	0.455807	0.556445	0.560415	0.776007	0.676303	0.231016	34.1587	5		1.24764	0.417055	b2811
[truncated: 841 more rows]
