# Supplementary material for: Effects of Kasugamycin on the Translatome of Escherichia coli
Source: PLoS One. 2017 Jan 12;12(1):e0168143. doi: 10.1371/journal.pone.0168143 (PMC5230787; doi:10.1371/journal.pone.0168143)
Supplement: S2 Table — (XLS) [file pone.0168143.s005.xls]

## Sheet: Tabelle1
Table S2. Sensitive transcripts (KEV < 0.5) and selected features taken from RegulonDB.
b-No.	Gene	Transcript	Length	intergenic	Operon	Coordinates 5'-UTR	Strand
		in	5'-UTR	distance	in RegulonDB		5'-UTR
		RegulonDB	[nt]	[nt]
b0995	torR		31			1057177-1057207	reverse
b2112	yehE		85			2190818-2190902	reverse
b2887	ygfT	no		large
b1579	intQ			13	dicB-ydfDE-insD-intQ
b0643	ybeL		26			674216-674241	forward
b0563	tfaX	no		146
b2562	yfhL	no		55
b4149	blc		24			4375745-4375768	reverse
b2079	baeR			-4	mdtABCD-baeSR
b0920	ycbC	no		135
b3375	frlR			99	frlABCDR
b4295	yjhU		58			4518347-4518404	reverse
b4185	yjfM			407	yjfKLMC
b2561	yfhH		53			2696729-2696781	forward
b1824	yobF		27			1905615-1905641	reverse
b3764	yifE	no		118
b3078	ygjI		165			3224092-3224256	forward
b1809	yoaB		47			1891345-1891391	forward
			9			1891383-1891391
b0314	betT		43			328645-328687	forward
b1694	ydiF	no		142
b2154	yeiG		23			2241910-2241932	forward
b0542	renD	no		4
b3773	ilvY		48			3955843-3955890	reverse
b4181	yjfI			126			operon
b0474	adk		37			496363-496399	forward
b1238	tdk		35			1292716-1292750	forward
b3009	yghB		35			3151551-3151585	forward
b3710	mdtL	no		131
b1839	yebY	no		12
b0669	no
b2048	cpsG	no		104
b2772	ugcU	no
b2115	yehH	no		140
b3261	fis			25	dusB-fis
b3180	yhbY		32			3325781-3325812	forward
b3602	yibL		69			3774620-3774688	forward
b1087	yceF		13			1145818-1145830	reverse
b2765	sscR	no		315
b1047	mdoC	no		393
b4336	yjiN	no		40
b1779	gapA		532			1860264-1860795	forward
			525			1860271-1860795
b1824	yobF		27			1905615-1905641	reverse
			203			1905615-1905817
b4117	adiA		36			4338544-4338579	reverse
b0935	ssuD			-4	ssuEADCB
b0937	ssuE		52			996735-996786	reverse
b2412	zipA		175			2529255-2529429	reverse
b1282	yciH				yciSM-pyrF-yciH		operon
b1088	yceD		146			1145872-1146017	forward
b1658	purR		156			1735713-1735868	forward
b2631	yfjO	no		-8
b3922	yiiS		98			4110892-4110990	forward
b0122	yacC		24			136917-136940	reverse
b0946	ycbW		103			1005073-1005175	forward
b0822	ybiV		61			859251-859311	reverse
b1481	bdm		61			1554304-1554364	reverse
b1448	yncA	no		674
b3093	exuT		103			3243024-3243126	forward
			62			3243065-3243126
b2587	kgtP		15			2723768-2723782	reverse
			64			2723768-2723831
						2723768-2723834
b4186	yjfC	no		2
b1201	dhaR		64			1250226-1250289	forward
b4061	yjcC		54			4273441-4273494	forward
b1033	ghrA		63			1097047-1097109	forward
b0785	moaE			1	moaABCDE
b4286	yjhV	no		10
b3357	crp		168			3483975-3484142	forward
			96			3484047-3484142
			90			3484053-3484142
b1109	ndh		94			1165215-1165308	forward
b0899	ycaM		10			946343-946452	forward
			3			946350-946452
			86			946367-946452
			85			946368-946452
b2007	yeeX		57			2077385-2077441	reverse
b0621	dcuC		116			655191-655306	reverse
b2353	tfaS	no		352
b0601	ybdM		180			634599-634778	reverse
b3718	yieK		7			3897416-3897422	reverse
			72			3897416-3897487
b3065	rpsU		136			3208668-3208803	forward
			70			3208734-3208803
			47			3208757-3208803
b0762	ybhT	no		129
b1778	msrB		36			1860453-1860488	reverse
b0884	infA		37			925666-925702	reverse
			243			925666-925908
b0521	ybcF				fdrA-ylbE_1E_2F-ybcF		operon
b3144	yraJ	no		28
b2910	zapA		62			3053573-3053634	forward
b3776	yifN		236			1634391-1634627	reverse
b0082	mraW	no		1
b1181	ycgN		148			1227906-1228053	forward
			81			1227973-1228053
			23			1228031-1228053
b0947	ycbX	no		243
b1755	ynjC			-28	ydjXYZ-ynjABCD
b1651	gloA		37			1725825-1725861	forward
b2123	yehR	no		125
b1826	mgrB		27			1906790-1906816	reverse
b1731	cedA		80			1811687-1811766	reverse
b2582	trxC		61			2716697-2716757	forward
b3151	yraQ		37			3296160-3296196	reverse
			70			3296160-3296229
b1815	yoaD	no		130
b2230	yfaA	no		149
b2277	nuoM			163	nuoABCEFGHIJKLMN
b2384	ypdE	no		-1
b0616	citE			-4	citCDEFXG
b2919	scpB	no		10
b1582	ynfA		7			1653697-1653703	reverse
			18			1653697-1653714
			27			1653697-1653723
b4060	yjcB		24			4273064-4273187	reverse
b0691	ybfG		29			1621874-1621903	reverse
b0382	iraP		68			400543-400610	forward
			24			400587-400610
b1785	yeaI		143			1868267-1868409	forward
			22			1868388-1868409
b1283	osmB		42			1341352-1341393	reverse
			149			1341352-1341500
