# Supplementary material for: Effects of Kasugamycin on the Translatome of Escherichia coli
Source: PLoS One. 2017 Jan 12;12(1):e0168143. doi: 10.1371/journal.pone.0168143 (PMC5230787; doi:10.1371/journal.pone.0168143)
Supplement: S3 Table — (XLS) [file pone.0168143.s006.xls]

## Sheet: Tabelle1
Table S3. Resistant transcripts (KEV >2.0) and selected features taken from RegulonDB.
b-No.	Gene	Transcript	Length	intergenic	Operon	Coordinates 5'-UTR	Strand
		in RegulonDB	5'-UTR	distance			5'-UTR
			[nt]	[nt]
b0828	iaaA		32			865760-865791	forward
b0398	sbcD		26			416176-416201	reverse
b1272	sohB		49			1327308-1327356	forward
			32			1327325-1327356
b3184	yhbE	no		-29
b3712	yieE		41			3891852-3891892	forward
b1538	dcp		28			1504778-1504805	forward
b2953	yggU	no		-4
b1198	dhaM	no		7
b3962	sthA		13			4158813-4158825	reverse
b3306	rpsH	no		35
b4114	eptA	no		103
b2568	lepB		156			2703331-2703486	reverse
			73			2705146-2705218
b1317	ycjU			-4	ycjMNOPQRSTUV-ymjB
b4015	aceA			29	aceBAK
b3955	yijP		47			4148288-4148334	reverse
b4306	yjhP	no		600
b3603	lldP		111			3775312-3775422	forward
b3701	dnaN		28			3880344-3880371	reverse
			242			3880344-3880585
			270			3880344-3880613
			413			3880344-3880756
b0534	sfmF	no		10
b2436	hemF		21			2551227-2551247	forward
b4161	rsgA		58			4389532-4389589	reverse
b2254	arnC	no		3
b4170	mutL		367			4395069-4395435	forward
			313			4395123-4395435
b4290	fecB			44	fecABCDE
b1034	ycdX	no		54
b0565	ompT		33			584856-584888	reverse
b3787	rffD			-4	rfe-wzzE-rffEDGHCA-wzxE-rffT-wzyE-rffM
b0414	ribD			3	nrdR-ribDE-nusB-thiL-pgpA
b3792	wzxE			1	rfe-wzzE-rffEDGHCA-wzxE-rffT-wzyE-rffM
b3183	obgE	no		15
b3772	ilvA		97			3953258-3953354	forward
b2853	ygeI		58			2991603-2991660	forward
			48			2991613-2991660
			36			2991625-2991660
b0115	aceF			14	pdhR-aceEF-lpd
b1211	prfA			41	hemA-prfA-prmC
b0008	talB		48			8191-8238	forward
b3067	rpoD		575			3210495-3211069	forward
			411			3210659-3211069
			360			3210710-3211069
			355			3210715-3211069
b3019	parC		58			3163995-3164052	reverse
b0194	proS		63			218775-218837	reverse
b2604	yfiN			-11	yfiRN
b2097	fbaB		104			2176586-2176689	reverse
b1714	pheS			283 (atten.)	pheMST-ihfA
b2205	napG			6	napFDAGHBC-ccmABCDEFGH
b4391	yjjK		45			4628545-4628589	reverse
b1828	yebQ		120			1908181-1908300	forward
			118			1908183-1908300
b0045	yaaU		216			45592-45807	forward
b3984	rplA			3	rplKAJL-rpoBC
b2757	ygcI	no		2
b2318	truA			-1	usg-truA-dedA
b3201	lptB		549			3341418-3341966	forward
b0054	imp	no		254
b3282	rimN	no		4
b3016
b3205	yhbJ	no		45
b1131	purB			3	hflD-purB
b1101	ptsG		244			1156849-1157092	forward
			104			1156989-1157092
b0184	dnaE			36	bamA-hlpA-lpxD-fabZ-lpxAB-rnhB-dnaE
b3168	infB			24	rimP-nusA-infB
b1375	ynaE	no		large
b1091	fabH		244			1147739-1147982	forward
b2678	proW			-7	proVWX
b4169	amiB			18	yjeF-tsaE-amiB-mutL-miaA-hfq-hflXKC
b2380	ypdA	no		375
b4085	alsE		187			4306501-4306687	reverse
			190			4306501-4306690
b1133	mnmA	no		53
b3313	rplP			12	rpsJ-rplCDWB-rpsS-rplV-rpsC-rplP-rpmC-rpsQ
b0416	nusB			19	nrdR-ribDE-nusB-thiL-pgpA
b3831	udp		41			4014414-4014454	forward
b1076	flgE			24	flgBCDEFGHIJ
b4239	treC			49	treBC
b2350	yfdG		119			2465759-2465877	forward
b1090	plsX			80	rpmF-plsX-fabHDG
b2594	rluD	no		134
b2908	pepP			25	ygfB-pepP-ubiHI
b0955	ycbZ		162			1017522-1017683	reverse
b2280	nuoJ			11	nuoABCEFGHIJKLMN
b4113	basR	no		-4
b1818	manY			62	manXYZ
b2584	yfiQ	no		31
b4254	argI		34			4476334-4476367	reverse
b4375	prfC		71			4607367-4607437	forward
			60			4607379-4607437
b2487	hyfG			-11	hyfABCDEFGHIJR-focB
b4349	hsdM	no		200
b0472	recR			-1	ybaB-recR
b2743	pcm			5	umpG-pcm
b2682	ygaZ		23			2807617-2807639	forward
b3389	aroB			56	aroKB-damX-dam-rpe-gph-trpS
b1865	nudB		43			1946656-1946698	reverse
b3894	fdoG	no		193
b4112	basS		206			4331295-4331500	reverse
b2441	eutB	no		178
b0033	carB		43			30775-30817	forward
b1075	flgD			11	flgBCDEFGHIJ
b0143	pcnB		26			159126-159151	reverse
			46			159126-159171
			70			159126-159195
			266			159126-159391
b2697	alaS		80			2820033-2820112	reverse
b3284	smg		77			3921703-3921779	reverse
b0921	smtA		134			972627-972760	forward
b3733	atpG			50	atpBEFHAGDC
b0523	purE		43			552323-552365	reverse
b3719	yieL	no		26
b1567	ydfW	no		-4
b1212	prmC			-1	hemA-prfA-prmC
b1132	hflD		56			1191854-1191909	reverse
b0882	clpA		185			922303-922487	forward
			173			922315-922487
			55			922433-922487
b2213	ada		23			2308427-2308449	reverse
b3318	rplW			-4	rpsJ-rplCDWB-rpsS-rplV-rpsC-rplP-rpmC-rpsQ
b4052	dnaB		32			4262306-4262337	forward
b2282	nuoH			-4	nuoABCEFGHIJKLMN
b3651	trmH			6	rpoZ-spoT-trmH-recG
b3946	fsaB	no		11
b0312	betB			13	betIBA
b3300	secY			7	rplNXE-rpsNH-rplFR-rpsE-rpmD-rplO-secY-rpmJ
b3194	yrbE	no		7
b2683	ygaH			-11	ygaZH
b3166	truB			-1	metY-rimP-nusA-infB-rbfA-truB-rpsO-pnp
b0081	mraZ		39			89596-89634	forward
b1210	hemA		132			1262806-1262937	forward
			39			1262899-1262937
b1763	topB			4	selD-topB
b3283	yrdD	no		28
b3958	argC		117			4152908-4153024	forward
b0655	gltI	no		249
b2286	nuoC			105	nuoABCEFGHIJKLMN
b3604	lldR			-1	lldPRD
b3415	gntT		155			3544427-3544581	forward
b3196	yrbG		65			3338233-3338297	forward
b0850	ybjC		22			890115-890136	forward
b0742	ybgF			9	tolB-pal-ybgF
b1378	ydbK		48			1438808-1438855	reverse
			63			1438808-1438870
b4183	yjfK	no		50
b4129	lysU		81			4352740-4352820	reverse
			89			4352740-4352828
b0914	msbA			36	ycaI-msbA-lpxK-ycaQ
b2689	yqaA	no
b2684	mprA		24			2808769-2808792	forward
b2208	napF		78			2301519-2301596	reverse
			81			2301519-2301599
			199			2301519-2301717
b3321	rpsJ		173			3451292-3451464	reverse
b0121	speE			105	yacC-speED
b3179	rrmJ	no		125
b0993	torS		5			1055401-1055405	reverse
